# Supplementary material
Source: MDPI journal article supplement (https://www.mdpi.com/1099-4300/16/11/5753)
Supplement: s1 [file s1]

## Sheet: data.v2
Date	M01	M02	M03	M04	M05	M06	M07	M08	M09	M10	M11	M12	M13	M14	M15	M16	M17	M18	P01	P02
2006-05-24	6.92326	22	121224	231711030	82188	178025718	0.0253163	0.182441	0.0997058	0.996507	1	1	0.000145194	0.00653351	-0.189315	2.26329	1.16162e+09	0.385164	2.02013e+10	2.42523e+10
2006-05-25	6.92584	22	122047	234981220	82564	180034268	0.0252999	0.181509	0.0995171	0.996504	1	1	0.000144199	0.00649902	-0.18843	2.26377	1.18132e+09	0.385105	2.02575e+10	2.43142e+10
2006-05-26	6.93654	22	122589	235973270	82355	178645096	0.0252999	0.177757	0.0995003	0.996523	1	1	0.000144094	0.00648601	-0.189134	2.28328	1.19403e+09	0.384652	2.02806e+10	2.43393e+10
2006-05-27	6.93536	22	122463	235475562	82274	178296732	0.0253063	0.177863	0.0995292	0.996532	1	1	0.000144241	0.00649231	-0.189389	2.28283	1.19126e+09	0.38474	2.02788e+10	2.43374e+10
2006-05-28	6.9337	22	122484	235647985	82316	178400590	0.0252248	0.177831	0.0993901	0.996497	1	1	0.000144175	0.00648894	-0.189348	2.28015	1.1921e+09	0.384845	2.02881e+10	24346693647
2006-05-29	6.92705	22	122943	237310418	82668	179584638	0.0252779	0.177911	0.100399	0.996522	1	1	0.000143611	0.00644472	-0.188168	2.2735	1.19518e+09	0.385149	2.03072e+10	2.43662e+10
2006-05-30	6.93045	22	123650	240072937	83140	181638910	0.0253057	0.177831	0.100531	0.99652	1	1	0.000142822	0.00631518	-0.188031	2.274	1.20922e+09	0.384942	2.03506e+10	2.44129e+10
2006-05-31	6.93071	22	123665	239793785	83161	181609309	0.025307	0.177978	0.100414	0.996527	1	1	0.000142936	0.00635755	-0.189079	2.27409	1.20561e+09	0.384952	2.03458e+10	2.44003e+10
2006-06-01	6.90287	21	122858	248691960	84570	190506570	0.025288	0.182376	0.10019	0.996526	1	1	0.000140432	0.00611425	-0.190021	2.34502	1.28923e+09	0.387912	2.10791e+10	2.54777e+10
2006-06-02	6.90891	21	122903	249085284	84520	190513900	0.0252715	0.181896	0.100239	0.996517	1	1	0.000140347	0.00611239	-0.190295	2.34099	1.29047e+09	0.387386	2.11125e+10	2.55136e+10
2006-06-03	6.90984	21	122931	249060187	84482	190330115	0.0253184	0.181656	0.100936	0.996524	1	1	0.000140352	0.00609065	-0.190145	2.34131	1.28999e+09	0.387302	2.111e+10	2.55107e+10
2006-06-04	6.91282	21	123082	249754826	84587	190965857	0.0253273	0.181738	0.101151	0.996524	1	1	0.000140147	0.00608371	-0.189978	2.3413	1.29341e+09	0.387003	2.11396e+10	2.55404e+10
2006-06-05	6.89066	21	123865	252009395	85181	192065221	0.02534	0.181944	0.101119	0.996529	1	1	0.000139419	0.00600362	-0.189018	2.33003	1.30505e+09	0.38874	2.12348e+10	2.5635e+10
2006-06-06	6.88191	21	124084	253162990	85280	192628520	0.025349	0.181587	0.101317	0.996519	1	1	0.00013911	0.00605212	-0.189309	2.31802	1.30998e+09	0.389582	2.12805e+10	2.56833e+10
2006-06-07	6.87299	21	124171	253306715	85325	192365830	0.0252061	0.181293	0.101255	0.996478	1	1	0.000139068	0.00604127	-0.189807	2.31726	1.31109e+09	0.390387	2.13102e+10	2.57448e+10
2006-06-08	6.87276	21	124703	255486151	85790	194870368	0.0251985	0.182805	0.101169	0.996474	1	1	0.000138496	0.00601146	-0.189683	2.31657	1.32243e+09	0.39053	2.13939e+10	2.58293e+10
2006-06-09	6.8565	21	124896	255828481	86084	195711454	0.0251795	0.18392	0.101425	0.996475	1	1	0.000138358	0.00601786	-0.18948	2.3133	1.31504e+09	0.391786	2.141e+10	2.58461e+10
2006-06-10	6.84943	21	125195	257105440	86277	196456665	0.0251909	0.18385	0.101553	0.996472	1	1	0.000138035	0.00618766	-0.189613	2.30512	1.3204e+09	0.392461	2.14433e+10	2.58801e+10
2006-06-11	6.84912	21	124955	256145371	86096	195598958	0.0251117	0.18372	0.10145	0.996446	1	1	0.000138266	0.00618456	-0.189981	2.3044	1.316e+09	0.392408	2.14294e+10	2.58582e+10
2006-06-12	6.85351	21	125883	259818604	86688	198277176	0.0252242	0.183338	0.104365	0.99641	1	1	0.000137335	0.00611975	-0.189823	2.30257	1.33838e+09	0.392245	2.15536e+10	2.60034e+10
2006-06-13	6.85562	21	126085	260675114	86826	198969742	0.0251397	0.183335	0.104209	0.996362	1	1	0.00013707	0.00609959	-0.189904	2.30131	1.34282e+09	0.391939	2.1587e+10	2.60459e+10
2006-06-14	6.86623	22	127246	262097317	87038	200198332	0.0251563	0.183656	0.104142	0.996384	1	1	0.000136852	0.00614895	-0.190156	2.28039	1.32145e+09	0.39157	2.17378e+10	2.62039e+10
2006-06-15	6.84714	22	127433	264488999	86788	201137368	0.0251487	0.183926	0.10413	0.996387	1	1	0.000136169	0.00637109	-0.189132	2.26686	1.33124e+09	0.393005	2.17885e+10	2.62584e+10
2006-06-16	6.83061	21	126546	264090535	86841	200947536	0.0251386	0.183975	0.104012	0.996381	1	1	0.000136136	0.00652852	-0.189593	2.27862	1.35534e+09	0.393825	2.16814e+10	2.61674e+10
2006-06-17	6.82773	21	126325	263199553	86703	200193737	0.0251462	0.183945	0.104044	0.996366	1	1	0.000136397	0.00653607	-0.189644	2.27869	1.35086e+09	0.394166	2.16784e+10	2.61633e+10
2006-06-18	6.82186	21	126396	263332501	86859	200974847	0.0251487	0.184926	0.103631	0.996382	1	1	0.000136327	0.0065362	-0.189247	2.28169	1.30703e+09	0.394644	2.16889e+10	2.61667e+10
2006-06-19	6.81702	21	126543	263985040	86949	201259358	0.0251553	0.184496	0.104292	0.996384	1	1	0.000136191	0.00663199	-0.189258	2.27587	1.31052e+09	0.395188	2.17128e+10	2.61989e+10
2006-06-20	6.78945	20	119798	267538231	78465	204983544	0.0251845	0.18697	0.104306	0.996385	1	1	0.000135196	0.00649248	-0.187846	2.24521	1.32373e+09	0.397487	2.18535e+10	2.63553e+10
2006-06-21	6.78839	20	119303	267918473	78489	205066166	0.0252634	0.186744	0.104458	0.996383	1	1	0.000135059	0.00648723	-0.187904	2.29105	1.35137e+09	0.397475	2.18294e+10	2.63367e+10
2006-06-22	6.7838	20	119566	269004690	78657	205806674	0.0252545	0.186715	0.104362	0.996381	1	1	0.000134763	0.00670367	-0.187661	2.28868	1.35518e+09	0.39776	2.18906e+10	2.6405e+10
2006-06-23	6.77936	20	119548	268768070	78708	205878320	0.0252277	0.187227	0.104123	0.996372	1	1	0.000134857	0.00658875	-0.187982	2.28865	1.35284e+09	0.398283	2.18934e+10	2.64082e+10
2006-06-24	6.77757	20	119501	268515967	78684	205672788	0.0252775	0.187298	0.103033	0.996418	1	1	0.000134922	0.00659077	-0.188198	2.28794	1.351e+09	0.398434	2.18918e+10	2.64028e+10
2006-06-25	6.78085	20	119589	268887534	78677	205403148	0.0251524	0.186481	0.102428	0.996377	1	1	0.000134826	0.00658776	-0.188513	2.29161	1.35636e+09	0.398186	2.19134e+10	2.64244e+10
2006-06-26	6.78675	20	120216	271969725	78942	207754300	0.0251894	0.186061	0.102575	0.996393	1	1	0.000134138	0.00684656	-0.187649	2.29176	1.3735e+09	0.398024	2.1928e+10	2.64416e+10
2006-06-27	6.80439	20	120518	273835319	79109	209596706	0.0252073	0.186063	0.102242	0.996392	1	1	0.000133819	0.00683128	-0.18786	2.30034	1.38673e+09	0.396978	2.19519e+10	2.64647e+10
2006-06-28	6.79828	20	120854	275116278	79296	210073980	0.025215	0.185582	0.103095	0.996399	1	1	0.000133496	0.00680872	-0.187451	2.29996	1.39385e+09	0.397472	2.19932e+10	2.65435e+10
2006-06-29	6.78606	20	121016	275354728	79492	210088175	0.0251629	0.185824	0.102904	0.9964	1	1	0.000133338	0.00679935	-0.187257	2.29648	1.39092e+09	0.398219	2.20043e+10	2.65468e+10
2006-06-30	6.77582	20	123435	278736960	81942	212476577	0.0251387	0.185847	0.1029	0.996401	1	1	0.000132567	0.00702127	-0.185939	2.2584	1.39458e+09	0.399354	2.22627e+10	2.68352e+10
2006-07-01	6.7936	20	122566	273583757	80556	206153414	0.0251515	0.180376	0.102541	0.996398	1	1	0.000133556	0.00689806	-0.188687	2.24211	1.36539e+09	0.396762	2.21605e+10	2.67124e+10
2006-07-02	6.80893	20	122445	273285333	80515	206502826	0.0249978	0.180701	0.101799	0.996355	1	1	0.000133704	0.00688428	-0.189155	2.25112	1.36851e+09	0.395606	2.2146e+10	2.66979e+10
2006-07-03	6.79188	20	121902	273819371	80234	206506502	0.0249673	0.18091	0.102312	0.996327	1	1	0.000133519	0.0069069	-0.188869	2.24063	1.37568e+09	0.396789	2.21635e+10	2.67215e+10
2006-07-04	6.78594	20	121910	273884649	80206	206492043	0.0250221	0.180951	0.102106	0.996344	1	1	0.000133506	0.00690286	-0.189355	2.23986	1.37618e+09	0.397349	2.21643e+10	2.67227e+10
2006-07-05	6.78725	20	122431	276443489	80554	208229168	0.0250425	0.180698	0.102187	0.996358	1	1	0.000132996	0.00686377	-0.189294	2.23763	1.3908e+09	0.397599	2.21877e+10	2.67496e+10
2006-07-06	6.78004	20	122523	276945829	80904	210527165	0.025031	0.182943	0.102054	0.996357	1	1	0.00013292	0.00677251	-0.189538	2.22898	1.38483e+09	0.398446	2.22329e+10	2.68091e+10
2006-07-07	6.77889	20	122646	277450713	81015	210905514	0.0250195	0.183012	0.101904	0.996358	1	1	0.00013279	0.00676576	-0.189751	2.22888	1.38722e+09	0.39856	2.22493e+10	2.68253e+10
2006-07-08	6.78001	20	122675	277619221	81047	211130292	0.0249762	0.183087	0.101813	0.996342	1	1	0.000132768	0.00669152	-0.189499	2.22897	1.38848e+09	0.398517	2.22509e+10	2.68293e+10
2006-07-09	6.78134	20	122638	277550756	81020	211105600	0.0250005	0.183065	0.101777	0.996349	1	1	0.000132777	0.00669415	-0.18952	2.23155	1.38769e+09	0.398376	2.22543e+10	2.68328e+10
2006-07-10	6.75966	20	123350	280099049	81574	212507234	0.0250235	0.183143	0.101714	0.996346	1	1	0.000132078	0.0070316	-0.189428	2.22423	1.38528e+09	0.400012	2.23214e+10	2.69046e+10
2006-07-11	6.75564	20	123331	279993847	81585	212304164	0.0250529	0.185224	0.101831	0.996347	1	1	0.000132085	0.0069716	-0.189936	2.22344	1.38876e+09	0.400339	2.23238e+10	2.69075e+10
2006-07-12	6.75535	20	123853	282323941	81954	214224121	0.0249814	0.185696	0.0994994	0.996357	1	1	0.000131564	0.00691454	-0.189614	2.22095	1.39513e+09	0.400433	2.24843e+10	2.70705e+10
2006-07-13	6.75829	20	124014	283188604	82046	214898448	0.0248164	0.185587	0.104998	0.996193	1	1	0.000131338	0.00690528	-0.189823	2.22178	1.40049e+09	0.400095	2.25101e+10	2.70962e+10
2006-07-14	6.75561	20	124102	283509419	82132	215216362	0.0248227	0.185826	0.105257	0.996211	1	1	0.000131257	0.00694153	-0.18946	2.22112	1.40201e+09	0.400296	2.25247e+10	2.71171e+10
2006-07-15	6.74471	20	124253	283979868	82212	214966431	0.0248203	0.185654	0.104908	0.996213	1	1	0.000131184	0.00692883	-0.188851	2.21478	1.40183e+09	0.401391	2.25511e+10	2.71492e+10
2006-07-16	6.74219	20	124180	283502383	82227	214930076	0.0248392	0.186108	0.104862	0.996224	1	1	0.000131297	0.00693433	-0.188866	2.21521	1.39871e+09	0.401667	2.2573e+10	2.71685e+10
2006-07-17	6.74592	20	124477	284712048	82408	215814728	0.0247936	0.185954	0.105102	0.996238	1	1	0.000131107	0.00692117	-0.188282	2.21589	1.40465e+09	0.401611	2.25956e+10	2.7196e+10
2006-07-18	6.73889	20	125003	286275646	82811	217584548	0.0247592	0.186577	0.10488	0.996243	1	1	0.000130797	0.00684866	-0.18719	2.21892	1.41195e+09	0.402428	2.26246e+10	2.72597e+10
2006-07-19	6.73593	20	125155	287082103	82959	218185891	0.0248096	0.186611	0.105066	0.996246	1	1	0.00013063	0.00683833	-0.186812	2.2245	1.41355e+09	0.402683	2.26357e+10	2.72581e+10
2006-07-20	6.72657	20	125789	289921615	83391	220030910	0.0247511	0.18633	0.105161	0.996223	1	1	0.000130018	0.00678677	-0.187153	2.21744	1.42517e+09	0.403617	2.26881e+10	2.73049e+10
2006-07-21	6.73613	20	126261	290959580	83765	219014475	0.0247222	0.183589	0.105085	0.996218	1	1	0.000129866	0.00675031	-0.187452	2.21533	1.43044e+09	0.402927	2.27003e+10	2.73169e+10
2006-07-22	6.7336	20	126201	290662636	83739	218732848	0.0247109	0.183589	0.105274	0.996215	1	1	0.000129903	0.00675248	-0.187643	2.21369	1.42835e+09	0.403112	2.27004e+10	2.73139e+10
2006-07-23	6.73326	20	126231	290772949	83756	218763902	0.0246525	0.183547	0.10608	0.996179	1	1	0.000129882	0.00675476	-0.187621	2.2135	1.42883e+09	0.403159	2.27026e+10	2.73161e+10
2006-07-24	6.73425	20	126373	292068880	83727	219652998	0.0247142	0.183391	0.106061	0.996233	1	1	0.000129624	0.00676725	-0.187431	2.21609	1.43978e+09	0.403199	2.27722e+10	2.73963e+10
2006-07-25	6.73573	20	128815	295530464	84661	222252136	0.0247268	0.183575	0.105741	0.996233	1	1	0.000128886	0.00670702	-0.186028	2.17894	1.46198e+09	0.403272	2.28131e+10	2.74819e+10
2006-07-26	6.73121	20	128948	296215564	84809	222836620	0.024523	0.183942	0.105644	0.996184	1	1	0.000128775	0.00667874	-0.185888	2.17877	1.46592e+09	0.403858	2.28515e+10	2.75239e+10
2006-07-27	6.72056	20	129089	296377778	84907	222438388	0.0244981	0.18386	0.105817	0.996186	1	1	0.000128671	0.00665739	-0.186237	2.17875	1.46681e+09	0.404663	2.28582e+10	2.75314e+10
2006-07-28	6.71583	20	129452	297874437	85093	223952687	0.0244582	0.184506	0.10356	0.996151	1	1	0.000128329	0.00663696	-0.185632	2.1716	1.47315e+09	0.404985	2.29384e+10	2.76164e+10
2006-07-29	6.71579	20	129412	297683063	85097	224074414	0.0244434	0.184767	0.104491	0.996152	1	1	0.000128377	0.00663907	-0.185523	2.17181	1.47235e+09	0.405018	2.29376e+10	2.76156e+10
2006-07-30	6.7115	20	129568	298251635	85236	224625238	0.024446	0.184945	0.104597	0.996165	1	1	0.000128286	0.00666315	-0.185216	2.17148	1.47552e+09	0.405566	2.29476e+10	2.76257e+10
2006-07-31	6.70398	20	129387	297159223	85191	223874174	0.0244125	0.18449	0.10472	0.996089	1	1	0.000128501	0.0066384	-0.185281	2.17306	1.47018e+09	0.40621	2.29908e+10	2.76698e+10
2006-08-01	6.67146	20	128546	300954686	85172	224077148	0.0243914	0.18402	0.104	0.996083	1	1	0.000127728	0.00655647	-0.185563	2.18865	1.47053e+09	0.409318	2.30885e+10	2.77195e+10
2006-08-02	6.67459	20	128670	301666685	85217	224534650	0.0244151	0.183981	0.103235	0.996102	1	1	0.000127674	0.00664466	-0.185217	2.18688	1.47346e+09	0.409252	2.31286e+10	2.77616e+10
2006-08-03	6.67015	20	128828	302291089	85343	224979908	0.0244201	0.184079	0.103188	0.996107	1	1	0.000127579	0.00666259	-0.185013	2.18362	1.47444e+09	0.409798	2.31773e+10	2.78103e+10
2006-08-04	6.66921	20	128942	302883583	85419	225327770	0.0243915	0.184006	0.103292	0.996101	1	1	0.000127466	0.00664732	-0.184877	2.17994	1.4776e+09	0.409913	2.32267e+10	2.78605e+10
2006-08-05	6.6724	21	131088	303346689	85971	225720642	0.0243192	0.183952	0.103477	0.996058	1	1	0.000127387	0.00664372	-0.18481	2.15578	1.49229e+09	0.409707	2.32259e+10	2.78597e+10
2006-08-06	6.67221	21	131204	303847185	86044	226096618	0.024328	0.183966	0.103917	0.996089	1	1	0.000127328	0.00664361	-0.184854	2.15614	1.49411e+09	0.409862	2.32391e+10	2.78809e+10
2006-08-07	6.67514	21	131732	306278358	86376	227977196	0.0242012	0.183835	0.104187	0.996068	1	1	0.000126852	0.0066137	-0.184602	2.15884	1.50692e+09	0.409724	2.32622e+10	2.79042e+10
2006-08-08	6.66847	21	132226	308404215	86659	229029906	0.0242186	0.183516	0.103562	0.99608	1	1	0.000126435	0.00658557	-0.183605	2.15569	1.51902e+09	0.410491	2.33149e+10	2.79722e+10
2006-08-09	6.66653	21	132284	308506986	86681	229076010	0.0242348	0.183516	0.104177	0.996114	1	1	0.000126432	0.0066636	-0.1834	2.15519	1.52111e+09	0.410747	2.33317e+10	2.79894e+10
2006-08-10	6.65447	21	132808	310514841	86986	229836470	0.0242323	0.183131	0.104341	0.996109	1	1	0.00012603	0.00686955	-0.182418	2.15374	1.52895e+09	0.411882	2.34684e+10	2.81557e+10
2006-08-11	6.65718	21	132832	310834349	86985	229832154	0.0241704	0.18284	0.103507	0.996062	1	1	0.000126005	0.00682904	-0.182225	2.15287	1.53243e+09	0.411745	2.34896e+10	2.81819e+10
2006-08-12	6.65509	21	132944	311251753	87051	229897682	0.0242773	0.182587	0.102077	0.996247	1	1	0.000125915	0.00682892	-0.182187	2.15343	1.53451e+09	0.411948	2.35015e+10	2.81944e+10
2006-08-13	6.65502	21	132931	311184051	87043	229851225	0.0242461	0.182609	0.101998	0.996218	1	1	0.00012593	0.00682963	-0.182194	2.15351	1.53421e+09	0.411962	2.35002e+10	2.81804e+10
2006-08-14	6.65599	21	133235	312647090	87219	230963554	0.024276	0.182681	0.10251	0.996253	1	1	0.000125625	0.00662713	-0.182266	2.1537	1.54135e+09	0.411841	2.3521e+10	2.82011e+10
2006-08-15	6.64657	21	133776	314851498	87609	232672604	0.0243071	0.182409	0.102868	0.996234	1	1	0.00012516	0.00659598	-0.182132	2.15104	1.54958e+09	0.412699	2.36157e+10	2.82977e+10
2006-08-16	6.65261	21	134155	316823603	87783	233819046	0.0242746	0.182254	0.102955	0.996225	1	1	0.000124767	0.00658228	-0.181865	2.15346	1.5613e+09	0.412106	2.36441e+10	2.8338e+10
2006-08-17	6.64973	21	134350	317595617	87961	234467008	0.0242084	0.181881	0.102621	0.996204	1	1	0.00012464	0.00660931	-0.181764	2.15262	1.56403e+09	0.41249	2.36776e+10	2.83725e+10
2006-08-18	6.64901	21	134633	318862111	88191	235651140	0.0242021	0.181663	0.102438	0.996191	1	1	0.000124444	0.00660177	-0.181415	2.15384	1.57101e+09	0.412782	2.38296e+10	2.85299e+10
2006-08-19	6.65371	21	134540	318371289	88101	235600446	0.0241658	0.180724	0.102891	0.99623	1	1	0.000124588	0.00661059	-0.181661	2.14909	1.56869e+09	0.412462	2.38282e+10	2.85435e+10
2006-08-20	6.65064	21	134881	319852883	88321	236547926	0.0241646	0.180543	0.102631	0.996169	1	1	0.000124276	0.00655289	-0.180936	2.14898	1.57535e+09	0.412698	2.38544e+10	2.85788e+10
2006-08-21	6.65378	21	135214	321506354	88537	237906691	0.0239779	0.180362	0.105198	0.996109	1	1	0.000123975	0.00665894	-0.179855	2.14964	1.58223e+09	0.412486	2.38798e+10	2.86037e+10
2006-08-22	6.65131	21	135473	323286085	88757	239078090	0.0239084	0.181754	0.104867	0.996068	1	1	0.000123607	0.00665759	-0.179284	2.14344	1.59147e+09	0.412659	2.39864e+10	2.8716e+10
2006-08-23	6.65151	21	135634	324082989	88668	239603386	0.0239379	0.181708	0.105275	0.996072	1	1	0.000123491	0.00664925	-0.178958	2.1464	1.59613e+09	0.412816	2.39936e+10	2.87232e+10
2006-08-24	6.64466	21	135629	323880523	88700	239352658	0.0238326	0.18164	0.105262	0.996035	1	1	0.000123533	0.00664683	-0.1789	2.14421	1.594e+09	0.413509	2.39976e+10	2.87439e+10
2006-08-25	6.6381	21	135771	325004519	88934	240245366	0.0238069	0.182181	0.104599	0.996034	1	1	0.000123363	0.00665034	-0.178604	2.14758	1.64538e+09	0.414352	2.40487e+10	2.87785e+10
2006-08-26	6.64125	21	135853	325487288	88972	240706839	0.023829	0.182229	0.103597	0.996063	1	1	0.000123248	0.00663507	-0.178582	2.14954	1.64993e+09	0.414035	2.40627e+10	2.87934e+10
2006-08-27	6.64333	21	135818	325391758	88943	240699478	0.0238731	0.18211	0.10337	0.996088	1	1	0.000123292	0.00684956	-0.17906	2.15022	1.64957e+09	0.413908	2.40676e+10	2.87983e+10
2006-08-28	6.6399	21	136120	326802975	89162	241783418	0.0239014	0.182075	0.103075	0.996041	1	1	0.000123083	0.00676508	-0.178648	2.14734	1.65792e+09	0.414417	2.40875e+10	2.88267e+10
2006-08-29	6.6356	21	136143	326723215	89178	241570658	0.0239743	0.181867	0.103207	0.996071	1	1	0.000123094	0.00678194	-0.178612	2.14711	1.65769e+09	0.414802	2.40846e+10	2.88324e+10
2006-08-30	6.61237	21	136245	326696058	89286	241665719	0.0240015	0.181448	0.104355	0.996103	1	1	0.000122987	0.00712979	-0.178521	2.13207	1.64583e+09	0.416595	2.41669e+10	2.89153e+10
2006-08-31	6.6061	21	135879	324877590	88903	238822686	0.0239743	0.181735	0.104159	0.996104	1	1	0.000123223	0.00722496	-0.178489	2.12573	1.63345e+09	0.416649	2.40103e+10	2.87479e+10
2006-09-01	6.57963	19	134124	331519462	90051	243669738	0.0239681	0.182163	0.10393	0.996106	1	1	0.000121997	0.00760963	-0.178828	2.18001	1.66529e+09	0.419361	2.4583e+10	2.93326e+10
2006-09-02	6.58239	19	133851	330272282	89867	242894144	0.0239631	0.182313	0.103842	0.996104	1	1	0.00012216	0.00762672	-0.17849	2.17971	1.66124e+09	0.418832	2.45345e+10	2.92602e+10
2006-09-03	6.58059	19	133885	330380074	89900	242954595	0.0239081	0.182347	0.103061	0.996097	1	1	0.000122117	0.00762456	-0.178526	2.17897	1.66033e+09	0.418905	2.45157e+10	2.92399e+10
2006-09-04	6.57901	19	134178	331752575	90103	243928696	0.0239229	0.182292	0.103848	0.996095	1	1	0.00012185	0.00760371	-0.178489	2.17856	1.6675e+09	0.419014	2.45652e+10	2.92934e+10
2006-09-05	6.5761	19	134558	333457338	90443	245846166	0.0237108	0.183	0.104006	0.996001	1	1	0.000121568	0.00757916	-0.177893	2.17976	1.67618e+09	0.419491	2.46102e+10	2.93435e+10
2006-09-06	6.57276	19	134844	334679395	90526	245414054	0.0236958	0.181657	0.104079	0.995983	1	1	0.000121357	0.00780689	-0.177556	2.17921	1.70044e+09	0.419811	2.46572e+10	2.94393e+10
2006-09-07	6.56218	19	134503	334406058	90487	244921460	0.0236897	0.181575	0.104133	0.995978	1	1	0.000121378	0.0078037	-0.177864	2.19544	1.65283e+09	0.420673	2.46765e+10	2.94629e+10
2006-09-08	6.56015	19	134895	336225920	90750	246077965	0.0237355	0.181418	0.104435	0.995972	1	1	0.000121064	0.00796342	-0.177142	2.19446	1.66216e+09	0.420961	2.46976e+10	2.94854e+10
2006-09-09	6.5593	19	134824	335850227	90708	245820494	0.0237503	0.181439	0.104415	0.995992	1	1	0.000121145	0.00798971	-0.177188	2.19436	1.66004e+09	0.42108	2.46969e+10	2.94855e+10
2006-09-10	6.55726	19	135238	337606303	90993	247464258	0.0237787	0.181677	0.104797	0.995995	1	1	0.000120798	0.00788238	-0.177073	2.18774	1.66779e+09	0.421114	2.4706e+10	2.94952e+10
2006-09-11	6.55411	19	135328	338109304	91059	247683062	0.0237874	0.181683	0.105251	0.996006	1	1	0.000120725	0.00786798	-0.177125	2.18685	1.6682e+09	0.421557	2.47039e+10	2.94955e+10
2006-09-12	6.55419	19	135993	340715148	91436	249699513	0.0237715	0.181558	0.108203	0.995873	1	1	0.000120294	0.00784295	-0.176105	2.16349	1.68073e+09	0.421683	2.47516e+10	2.95521e+10
2006-09-13	6.54719	19	136159	341687467	91634	250664550	0.0237802	0.181493	0.108599	0.995893	1	1	0.000120063	0.00791455	-0.175945	2.16191	1.68529e+09	0.422199	2.47516e+10	2.95532e+10
2006-09-14	6.54693	19	136268	342209305	91704	251021760	0.0237666	0.181487	0.108772	0.99585	1	1	0.000119971	0.00787137	-0.175904	2.16236	1.68814e+09	0.422225	2.47602e+10	2.95605e+10
2006-09-15	6.53889	19	136765	344535941	92053	252417838	0.0237581	0.181395	0.108474	0.995919	1	1	0.000119584	0.00783262	-0.176162	2.15978	1.69894e+09	0.423153	2.48193e+10	2.96263e+10
2006-09-16	6.53894	19	136694	344068456	92012	252211484	0.0238186	0.181434	0.108809	0.995928	1	1	0.000119595	0.00778293	-0.176011	2.16167	1.69779e+09	0.422878	2.48246e+10	2.96317e+10
2006-09-17	6.53697	19	136603	343562904	91999	252224307	0.023884	0.18035	0.108874	0.995929	1	1	0.000119668	0.00778739	-0.176235	2.16111	1.69487e+09	0.42298	2.48204e+10	2.96247e+10
2006-09-18	6.53299	19	136919	345097042	92290	253819697	0.0238533	0.180206	0.109465	0.995939	1	1	0.000119414	0.00776516	-0.175727	2.15904	1.70002e+09	0.423357	2.48407e+10	2.96539e+10
2006-09-19	6.53391	19	137148	346288648	92430	254667824	0.0239301	0.180315	0.109301	0.995944	1	1	0.000119171	0.00776249	-0.175689	2.15881	1.70535e+09	0.423106	2.48466e+10	2.96597e+10
2006-09-20	6.53252	19	138026	351142066	93139	258501301	0.0239105	0.180791	0.10968	0.995869	1	1	0.000118354	0.00769235	-0.174606	2.18746	1.72675e+09	0.423323	24879309646	2.97092e+10
2006-09-21	6.52853	19	137990	350656726	93128	258085322	0.0239438	0.180791	0.109744	0.99586	1	1	0.000118381	0.00769454	-0.174271	2.18879	1.72442e+09	0.42345	2.48812e+10	2.97071e+10
2006-09-22	6.52686	19	139448	351243795	93201	258053715	0.0239697	0.181007	0.109407	0.995819	1	1	0.000118282	0.00783051	-0.174513	2.15151	1.74102e+09	0.423695	2.49593e+10	2.97879e+10
2006-09-23	6.52895	19	139377	350950016	93139	257806131	0.0240868	0.180965	0.109407	0.995829	1	1	0.000118336	0.00783826	-0.174605	2.15288	1.74026e+09	0.423528	2.49526e+10	2.97812e+10
2006-09-24	6.52897	19	139347	350815747	93125	257747655	0.0241081	0.181015	0.109355	0.995746	1	1	0.000118363	0.00783977	-0.174611	2.15259	1.73957e+09	0.423531	2.49529e+10	2.97812e+10
2006-09-25	6.52443	19	139679	352332301	93415	259293373	0.0240886	0.181551	0.109422	0.995711	1	1	0.000118123	0.00770705	-0.174961	2.15025	1.74715e+09	0.424085	2.49947e+10	2.98416e+10
2006-09-26	6.52704	19	140192	352812723	93397	259083336	0.0241088	0.181322	0.109484	0.995656	1	1	0.000118084	0.00768894	-0.174682	2.14982	1.74998e+09	0.424026	2.49871e+10	2.98351e+10
2006-09-27	6.52105	19	140100	352149736	93423	258949029	0.0243294	0.181254	0.109404	0.995522	1	1	0.000118206	0.00768861	-0.174397	2.14912	1.747e+09	0.424727	2.50061e+10	2.98639e+10
2006-09-28	6.5178	19	140268	352855434	93499	259283062	0.0243345	0.181269	0.108973	0.995544	1	1	0.000118151	0.00768047	-0.174198	2.1519	1.75116e+09	0.425305	2.50294e+10	2.99002e+10
2006-09-29	6.50623	19	140371	353109978	93641	259276113	0.0243243	0.180969	0.108961	0.995545	1	1	0.000118041	0.00767042	-0.174023	2.14385	1.74458e+09	0.426194	2.50873e+10	3.00145e+10
2006-09-30	6.50495	19	140511	353718611	93755	259720252	0.0243779	0.181006	0.108843	0.995546	1	1	0.000117989	0.00765449	-0.174129	2.14471	1.74853e+09	0.426547	2.51173e+10	3.00449e+10
2006-10-01	6.51368	19	140760	354193383	93555	261962992	0.0247751	0.181592	0.10906	0.995572	1	1	0.000117953	0.00726348	-0.177415	2.11975	1.73253e+09	0.426022	2.51846e+10	3.00525e+10
2006-10-02	6.52353	19	140622	353776915	93433	262052205	0.0247893	0.181586	0.109048	0.995548	1	1	0.000118104	0.00733933	-0.177879	2.12342	1.73003e+09	0.425254	2.51702e+10	3.00377e+10
2006-10-03	6.52287	19	140664	353945018	93458	262093398	0.024835	0.181551	0.10966	0.995507	1	1	0.000118073	0.00738528	-0.177953	2.12336	1.73084e+09	0.425309	2.51718e+10	3.00399e+10
2006-10-04	6.52297	19	140639	353814701	93440	261991258	0.0248559	0.181543	0.109277	0.995593	1	1	0.000118091	0.00748271	-0.177959	2.12365	1.73014e+09	0.425287	2.51632e+10	3.00314e+10
2006-10-05	6.52495	19	140634	353853870	93429	262060305	0.0248875	0.18155	0.109106	0.995589	1	1	0.000118113	0.0074833	-0.177818	2.12519	1.73126e+09	0.425233	2.51631e+10	3.00314e+10
2006-10-06	6.52464	19	140638	353837019	93434	262057848	0.0248233	0.181561	0.109005	0.995581	1	1	0.000118095	0.00748327	-0.177888	2.12571	1.73127e+09	0.425191	2.51735e+10	3.00413e+10
2006-10-07	6.5249	19	140595	353647483	93407	261952902	0.024902	0.181515	0.109009	0.995624	1	1	0.000118126	0.00748543	-0.177882	2.12569	1.73146e+09	0.425177	2.51704e+10	3.00374e+10
2006-10-08	6.51853	19	140954	355205083	93693	263233646	0.0249427	0.181068	0.109346	0.995639	1	1	0.000117915	0.0074263	-0.177412	2.12411	1.73967e+09	0.425977	2.53409e+10	3.02159e+10
2006-10-09	6.51066	19	141014	356068697	93794	264084293	0.0249427	0.18133	0.109393	0.995638	1	1	0.00011778	0.00742799	-0.17708	2.12732	1.74263e+09	0.426823	2.54657e+10	3.0342e+10
2006-10-10	6.50806	19	141514	358859125	94117	265943214	0.0249256	0.181161	0.109974	0.99564	1	1	0.000117434	0.00781114	-0.176788	2.1244	1.75795e+09	0.427573	2.55429e+10	3.04267e+10
2006-10-11	6.50498	19	141580	358621117	94213	265604725	0.0249454	0.181353	0.109817	0.995612	1	1	0.000117483	0.00781408	-0.176587	2.12803	1.7548e+09	0.427885	2.55165e+10	3.04009e+10
2006-10-12	6.50754	19	142103	361020890	94520	267130990	0.024961	0.182152	0.108061	0.995606	1	1	0.000117118	0.0078337	-0.175726	2.13058	1.77567e+09	0.427847	2.55527e+10	3.04403e+10
2006-10-13	6.50336	19	142328	361885834	94752	268212118	0.025011	0.181925	0.107544	0.995583	1	1	0.000116979	0.00779435	-0.175658	2.13156	1.77967e+09	0.428321	2.55698e+10	3.04556e+10
2006-10-14	6.5053	19	142378	362130905	94772	268478722	0.0249939	0.181944	0.10764	0.995597	1	1	0.000116925	0.00777693	-0.175449	2.13363	1.78078e+09	0.428069	2.55727e+10	3.04645e+10
2006-10-15	6.50785	19	142998	365300664	95268	271847508	0.0252145	0.182087	0.107741	0.995582	1	1	0.000116401	0.00777925	-0.175069	2.13422	1.79687e+09	0.427788	2.56234e+10	3.05282e+10
2006-10-16	6.49911	19	143252	366464495	95353	272339590	0.0253135	0.182331	0.107768	0.995567	1	1	0.000116239	0.0079032	-0.174552	2.12926	1.80023e+09	0.428672	2.56528e+10	3.05637e+10
2006-10-17	6.49775	19	143441	367354737	95515	273449090	0.0253389	0.181792	0.107889	0.995548	1	1	0.000116084	0.00782517	-0.174545	2.13003	1.8069e+09	0.42879	2.56966e+10	3.0607e+10
2006-10-18	6.49951	19	143912	370015451	95787	275276839	0.0253643	0.18178	0.107197	0.995558	1	1	0.000115649	0.0080126	-0.173973	2.12767	1.8203e+09	0.42853	2.57881e+10	3.07041e+10
2006-10-19	6.4998	19	143976	370240356	95807	275275770	0.0254183	0.18153	0.107368	0.995568	1	1	0.000115593	0.00801017	-0.173883	2.1302	1.82337e+09	0.428498	2.57802e+10	3.07302e+10
2006-10-20	6.49734	19	141360	373018770	93836	277373280	0.025459	0.181445	0.107399	0.995579	1	1	0.00011522	0.00801303	-0.173813	2.13682	1.77468e+09	0.428896	2.58466e+10	3.07904e+10
2006-10-21	6.49437	19	141379	371179833	94145	275814246	0.0254184	0.181181	0.107213	0.995615	1	1	0.000115528	0.00803499	-0.17355	2.14661	1.7683e+09	0.429259	2.58308e+10	3.07636e+10
2006-10-22	6.49526	19	141365	371091735	94128	275703940	0.0251996	0.181141	0.106644	0.995638	1	1	0.000115562	0.00803661	-0.173141	2.14803	1.76863e+09	0.429285	2.5824e+10	3.07559e+10
2006-10-23	6.4957	19	141781	373272462	94390	277404685	0.0251588	0.181168	0.10648	0.995588	1	1	0.000115225	0.00799988	-0.173432	2.14964	1.77881e+09	0.42923	2.58477e+10	3.07975e+10
2006-10-24	6.49617	19	141934	374066042	94488	277941700	0.0252362	0.181143	0.104509	0.995685	1	1	0.00011512	0.00799169	-0.173507	2.14976	1.78133e+09	0.429241	2.58586e+10	3.0811e+10
2006-10-25	6.49208	19	142091	375225329	94872	281061346	0.0252656	0.181126	0.104084	0.995699	1	1	0.000114943	0.00798533	-0.173232	2.14505	1.78414e+09	0.429678	2.59052e+10	3.08618e+10
2006-10-26	6.49281	19	142419	376944891	95082	282030294	0.0253647	0.181147	0.103096	0.995682	1	1	0.000114655	0.00806255	-0.173028	2.14562	1.79472e+09	0.429517	2.5997e+10	3.09713e+10
2006-10-27	6.50107	19	142505	377844609	95069	283157286	0.0253554	0.181552	0.103421	0.995777	1	1	0.000114588	0.0079962	-0.174958	2.14604	1.7984e+09	0.428759	2.60121e+10	3.10078e+10
2006-10-28	6.50195	19	142526	377965579	95094	283323051	0.0252349	0.181562	0.10323	0.995758	1	1	0.000114558	0.0080016	-0.174746	2.1463	1.79867e+09	0.42861	2.60095e+10	3.10053e+10
2006-10-29	6.50506	19	142501	377936333	95063	283363706	0.0253206	0.181355	0.1035	0.995783	1	1	0.000114561	0.00800537	-0.17471	2.14719	1.79913e+09	0.428295	2.60059e+10	3.10017e+10
2006-10-30	6.50505	19	142998	380605120	95410	285315602	0.0252944	0.181387	0.103775	0.99573	1	1	0.000114168	0.00796669	-0.174321	2.14764	1.81109e+09	0.428409	2.60705e+10	3.10714e+10
2006-10-31	6.51169	19	142867	380008185	95179	284154190	0.0253011	0.181113	0.105135	0.995731	1	1	0.000114353	0.00795966	-0.173937	2.15147	1.80993e+09	0.428157	2.60904e+10	3.10917e+10
2006-11-01	6.46232	19	144134	384493001	96117	285553667	0.0253523	0.184396	0.105541	0.995741	1	1	0.000113364	0.00770333	-0.177486	2.13278	1.89756e+09	0.431973	2.61741e+10	3.11599e+10
2006-11-02	6.45929	19	144123	384312557	96121	285334596	0.0253786	0.184038	0.105483	0.995742	1	1	0.000113364	0.00780586	-0.177253	2.13181	1.89561e+09	0.432117	2.61612e+10	3.11468e+10
2006-11-03	6.45712	19	144485	386158686	96411	287097367	0.0254764	0.184259	0.105374	0.99574	1	1	0.000113068	0.00777858	-0.176864	2.1302	1.90456e+09	0.432212	2.61983e+10	3.12117e+10
2006-11-04	6.4588	19	144522	386400090	96435	287382055	0.0254381	0.184275	0.104957	0.995758	1	1	0.000113035	0.00777853	-0.176783	2.13086	1.90593e+09	0.432031	2.61931e+10	3.12064e+10
2006-11-05	6.46122	19	144739	386898241	96630	287828162	0.0254146	0.18402	0.105254	0.995775	1	1	0.000112957	0.00777492	-0.176692	2.13138	1.90819e+09	0.431747	2.61931e+10	3.12062e+10
2006-11-06	6.4593	19	145068	389119567	96854	289663841	0.0254282	0.182236	0.105468	0.99582	1	1	0.000112619	0.00773388	-0.177158	2.12221	1.91781e+09	0.431812	2.62382e+10	3.12572e+10
2006-11-07	6.4575	19	145225	389862247	96964	290043665	0.0254128	0.182063	0.106315	0.995863	1	1	0.000112506	0.00772626	-0.177262	2.12256	1.92163e+09	0.432008	2.6247e+10	3.1266e+10
2006-11-08	6.45477	19	145455	391046115	97076	290640070	0.0254111	0.181976	0.106059	0.995873	1	1	0.000112341	0.00772883	-0.177273	2.11931	1.92733e+09	0.432278	2.62664e+10	3.12872e+10
2006-11-09	6.45394	19	145496	391280211	97103	290742478	0.025495	0.178956	0.105935	0.995865	1	1	0.00011235	0.00770715	-0.177772	2.12084	1.84143e+09	0.432521	2.62718e+10	3.12919e+10
2006-11-10	6.44694	19	145548	392206051	97200	291050627	0.0255458	0.178832	0.106097	0.99588	1	1	0.000112226	0.00778594	-0.17749	2.12067	1.83421e+09	0.433255	2.63172e+10	3.13577e+10
2006-11-11	6.44746	19	145475	391810829	97046	290605708	0.0255266	0.178759	0.107043	0.995876	1	1	0.000112307	0.00784267	-0.17734	2.12242	1.83339e+09	0.43331	2.63378e+10	3.13803e+10
2006-11-12	6.45099	19	145481	391740916	97057	290049620	0.0258347	0.178833	0.100999	0.996082	1	1	0.000112347	0.00780923	-0.177326	2.12575	1.83321e+09	0.433064	2.63291e+10	3.13716e+10
2006-11-13	6.43402	19	145579	391277709	97134	288544450	0.0257403	0.181932	0.0998324	0.996016	1	1	0.000112316	0.00780489	-0.176375	2.1242	1.82819e+09	0.434621	2.63514e+10	3.1394e+10
2006-11-14	6.42604	19	145677	391501401	97240	288577031	0.0257238	0.18237	0.099752	0.996026	1	1	0.000112269	0.00781288	-0.176411	2.12129	1.82566e+09	0.435351	2.63482e+10	3.13919e+10
2006-11-15	6.41876	19	146022	393115273	97506	289565114	0.0257447	0.182546	0.100121	0.996046	1	1	0.000112065	0.00812094	-0.176498	2.11812	1.83289e+09	0.436211	2.63834e+10	3.1452e+10
2006-11-16	6.41812	19	146166	394142618	97508	289771896	0.0257737	0.182715	0.0999889	0.99604	1	1	0.000111933	0.00809095	-0.176242	2.12012	1.84743e+09	0.43636	2.6394e+10	3.14773e+10
2006-11-17	6.41659	19	146161	394048611	97511	289716878	0.0257695	0.182705	0.100158	0.996055	1	1	0.000111957	0.00812041	-0.175885	2.11969	1.84578e+09	0.436574	2.64008e+10	3.14888e+10
2006-11-18	6.41672	19	146078	393630152	97439	289260538	0.0257226	0.182691	0.100115	0.996076	1	1	0.000112038	0.00812999	-0.175909	2.11968	1.84738e+09	0.436665	2.63982e+10	3.14857e+10
2006-11-19	6.41638	19	145921	392827587	97331	288625784	0.0257281	0.182657	0.100406	0.996046	1	1	0.000112162	0.00813554	-0.17581	2.12051	1.84373e+09	0.436753	2.63977e+10	3.14847e+10
2006-11-20	6.4041	18	144257	394133728	97602	289214356	0.0257961	0.182465	0.100711	0.996041	1	1	0.000111975	0.00809641	-0.176151	2.1239	1.82655e+09	0.437997	2.64651e+10	3.15621e+10
2006-11-21	6.41126	18	144440	395214593	97656	290005218	0.0257961	0.182241	0.100958	0.99604	1	1	0.000111931	0.00813235	-0.17634	2.11954	1.8357e+09	0.43779	2.65145e+10	3.16134e+10
2006-11-22	6.40861	18	144636	396333484	97779	290564278	0.025852	0.182204	0.101316	0.996066	1	1	0.000111804	0.00820305	-0.176385	2.11752	1.83908e+09	0.438124	2.65362e+10	3.16443e+10
2006-11-23	6.40314	18	144457	396208469	97650	290501438	0.0258408	0.181069	0.101478	0.996066	1	1	0.000111816	0.00821165	-0.176485	2.10784	1.83724e+09	0.438686	2.6551e+10	3.16592e+10
2006-11-24	6.40036	18	144593	396820302	97728	290861340	0.025888	0.181016	0.101578	0.996059	1	1	0.000111724	0.00816596	-0.176729	2.10661	1.83874e+09	0.43896	2.65744e+10	3.16898e+10
2006-11-25	6.40144	18	144648	397029745	97744	290855788	0.0259104	0.180818	0.101745	0.996071	1	1	0.000111733	0.00816508	-0.176601	2.10739	1.83971e+09	0.438992	2.6585e+10	3.17006e+10
2006-11-26	6.40284	18	144508	396332650	97660	290392520	0.0258633	0.180855	0.102236	0.996091	1	1	0.000111833	0.00817365	-0.17667	2.10784	1.83713e+09	0.438881	2.65782e+10	3.16937e+10
2006-11-27	6.40017	18	144615	396879926	97745	291147042	0.0259045	0.180842	0.102397	0.996076	1	1	0.000111817	0.00819913	-0.177255	2.10421	1.83846e+09	0.439385	2.65995e+10	3.17252e+10
2006-11-28	6.3998	18	144745	397570038	97839	291663527	0.0259017	0.18083	0.102246	0.996048	1	1	0.000111745	0.00798541	-0.177423	2.1041	1.84126e+09	0.43954	2.66123e+10	3.17375e+10
2006-11-29	6.40263	18	144706	397460153	97792	291590996	0.0259314	0.180934	0.102369	0.995964	1	1	0.000111777	0.00800339	-0.177257	2.10602	1.84271e+09	0.439379	2.5982e+10	3.06973e+10
2006-11-30	6.39525	18	145012	399500201	98082	292603468	0.0258882	0.180989	0.102307	0.995942	1	1	0.000111575	0.00792703	-0.176976	2.10721	1.85073e+09	0.440507	2.6066e+10	3.08035e+10
2006-12-01	6.37813	18	144827	399143704	97832	291168932	0.0259088	0.180217	0.102351	0.995908	1	1	0.000111783	0.00783252	-0.178837	2.0899	1.84395e+09	0.442918	2.63009e+10	3.11022e+10
2006-12-02	6.39235	18	144194	396039166	97354	289000988	0.0259824	0.179716	0.0992195	0.995848	1	1	0.000112184	0.00790277	-0.178562	2.09619	1.83706e+09	0.441186	2.62356e+10	3.10291e+10
2006-12-03	6.39509	18	144005	395212723	97234	288747932	0.0260711	0.179975	0.0990388	0.995633	1	1	0.000112321	0.00797624	-0.179124	2.09586	1.83359e+09	0.440859	2.62305e+10	3.10239e+10
2006-12-04	6.39796	18	144314	397099274	97421	290078758	0.0260406	0.180034	0.099102	0.995636	1	1	0.000112095	0.00806151	-0.178796	2.09516	1.84136e+09	0.440751	2.62854e+10	3.10814e+10
2006-12-05	6.3839	17	135066	397579152	84498	291562823	0.0260577	0.181109	0.0992067	0.995585	1	1	0.000111963	0.00811909	-0.179476	2.06942	1.91286e+09	0.442003	2.68024e+10	3.16008e+10
2006-12-06	6.37444	17	135354	398841653	84694	292030906	0.02605	0.180995	0.0986843	0.995594	1	1	0.000111739	0.00809895	-0.178876	2.06346	1.91386e+09	0.442795	2.68429e+10	3.16479e+10
2006-12-07	6.37784	17	135492	399553794	84621	292534312	0.0260486	0.180918	0.0996123	0.995621	1	1	0.000111623	0.00809195	-0.178752	2.06506	1.92024e+09	0.442384	2.68673e+10	3.16813e+10
2006-12-08	6.37161	17	135670	400520169	84820	293539958	0.0260472	0.181437	0.0996303	0.995622	1	1	0.000111428	0.00811622	-0.17867	2.06031	1.92249e+09	0.442775	2.68946e+10	3.17135e+10
2006-12-09	6.3717	17	135284	398883953	84778	292483456	0.0260758	0.181644	0.099612	0.995594	1	1	0.000111663	0.00812544	-0.178806	2.06104	1.91451e+09	0.442757	2.68835e+10	3.17361e+10
2006-12-10	6.36885	17	135425	399632755	84870	292968331	0.0260138	0.181588	0.0997079	0.995752	1	1	0.000111531	0.00819797	-0.178832	2.0582	1.91791e+09	0.442919	2.69153e+10	3.17734e+10
2006-12-11	6.36636	17	135363	398834914	84808	292652518	0.0260424	0.181723	0.0979884	0.995798	1	1	0.000111639	0.00832577	-0.179784	2.06078	1.91122e+09	0.443117	2.68487e+10	3.16514e+10
2006-12-12	6.37047	18	139881	401592167	90986	294768901	0.0260438	0.181857	0.0982172	0.995729	1	1	0.000111349	0.00830836	-0.180061	2.06905	1.97373e+09	0.443155	2.69543e+10	3.17821e+10
2006-12-13	6.37418	18	139987	402183652	91084	295725486	0.0260495	0.182247	0.0984795	0.99573	1	1	0.000111289	0.00834235	-0.180516	2.07534	1.97737e+09	0.44293	2.69637e+10	3.17919e+10
2006-12-14	6.38711	22	173545	404436070	127885	297546650	0.0260409	0.182192	0.0985783	0.995732	1	1	0.000111052	0.00829103	-0.180094	2.3077	1.92437e+09	0.442021	2.70034e+10	3.18353e+10
2006-12-15	6.37866	22	174045	406705222	128237	298641625	0.0261884	0.181646	0.0985743	0.995349	1	1	0.000110764	0.00854759	-0.17876	2.30037	1.93023e+09	0.443104	2.71399e+10	3.19806e+10
2006-12-16	6.38825	22	173679	405443314	127715	295545315	0.026187	0.180004	0.0985032	0.995404	1	1	0.000110969	0.008471	-0.17912	2.30323	1.92684e+09	0.442198	2.71006e+10	3.19337e+10
2006-12-17	6.38658	22	173462	404402014	127564	294800086	0.0262288	0.179995	0.0985128	0.995068	1	1	0.000111123	0.00839024	-0.179146	2.30148	1.91965e+09	0.442373	2.70698e+10	3.19023e+10
2006-12-18	6.38277	22	173878	406318570	128419	302306956	0.0262693	0.185755	0.0987697	0.995595	1	1	0.000110926	0.00835065	-0.178739	2.2944	1.92353e+09	0.443089	2.7303e+10	3.21634e+10
2006-12-19	6.38922	22	173935	406440851	128501	303014422	0.026265	0.18344	0.0985418	0.996484	1	1	0.000110949	0.00831983	-0.178864	2.29549	1.9259e+09	0.442621	2.73045e+10	3.21779e+10
2006-12-20	6.38216	22	174581	409020840	128983	304419150	0.0261582	0.183118	0.0985055	0.995296	1	1	0.000110642	0.00849706	-0.178716	2.29344	1.93426e+09	0.44354	2.73717e+10	3.22481e+10
2006-12-21	6.37929	22	174062	406169395	128654	302538915	0.0261325	0.18359	0.0984074	0.995303	1	1	0.000110969	0.00826906	-0.179114	2.29278	1.91837e+09	0.443494	2.7228e+10	3.21286e+10
2006-12-22	6.3774	21	174058	406481046	128659	302676638	0.0261529	0.183582	0.0982454	0.994896	1	1	0.000110929	0.00824594	-0.17924	2.28725	1.91257e+09	0.443676	2.72556e+10	3.21802e+10
2006-12-23	6.37715	21	173907	405744890	128556	302197754	0.0263342	0.183602	0.0983012	0.998077	1	1	0.000111008	0.00825397	-0.179205	2.28822	1.91015e+09	0.443609	2.72364e+10	3.2159e+10
2006-12-24	6.37754	21	173791	405266299	128472	301917362	0.0262694	0.183724	0.0983158	0.997864	1	1	0.000111075	0.0082614	-0.178988	2.28841	1.90805e+09	0.443552	2.72309e+10	3.21533e+10
2006-12-25	6.37497	21	174055	406469588	128659	302597213	0.0262852	0.183606	0.0981997	0.998003	1	1	0.000110976	0.00829179	-0.178958	2.28844	1.914e+09	0.444121	2.73087e+10	3.23671e+10
2006-12-26	6.37746	21	173976	406340289	128551	302191998	0.0262938	0.18349	0.0978773	0.998008	1	1	0.000110945	0.00830001	-0.179534	2.28692	1.91198e+09	0.443522	2.73267e+10	3.2411e+10
2006-12-27	6.37274	21	173978	406039552	128543	301477634	0.0263039	0.183217	0.0979263	0.998097	1	1	0.000110976	0.00830136	-0.17925	2.2866	1.91013e+09	0.443971	2.72877e+10	3.22618e+10
2006-12-28	6.36751	21	173513	407505777	128045	302905972	0.0263876	0.183769	0.0985541	0.998304	1	1	0.000110768	0.00825883	-0.178787	2.2762	1.91332e+09	0.444597	2.75143e+10	3.24948e+10
2006-12-29	6.37057	21	173361	407053028	127900	302486976	0.0263069	0.184049	0.0983905	0.998149	1	1	0.00011085	0.00811647	-0.179088	2.2798	1.91378e+09	0.444396	2.7533e+10	3.2508e+10
2006-12-30	6.3804	21	173185	406599920	127758	302643460	0.0262695	0.184179	0.0982213	0.998166	1	1	0.00011091	0.00823567	-0.178626	2.28314	1.914e+09	0.443427	2.75142e+10	3.24177e+10
2006-12-31	6.42339	22	170067	390206433	125374	291675092	0.0262074	0.184135	0.098404	0.997806	1	1	0.000113171	0.00836095	-0.188631	2.33321	1.85543e+09	0.4386	2.72689e+10	3.20049e+10
2007-01-01	6.56599	19	136808	331887812	93666	242601839	0.0262159	0.170468	0.102847	0.997918	1	1	0.000122073	0.00727968	-0.194489	2.23589	1.61738e+09	0.421167	2.54781e+10	2.95938e+10
2007-01-02	6.56663	19	136672	331392230	93506	242217040	0.026304	0.170244	0.103032	0.998231	1	1	0.000122139	0.00727536	-0.194362	2.22578	1.61324e+09	0.420932	2.55564e+10	2.98462e+10
2007-01-03	6.56697	19	136768	331871455	93569	242550688	0.0263446	0.170336	0.103012	0.998333	1	1	0.000122048	0.00726938	-0.194238	2.2259	1.61549e+09	0.420899	2.55974e+10	2.98872e+10
2007-01-04	6.56644	19	137459	335153628	94210	246676848	0.026391	0.170244	0.102583	0.998456	1	1	0.000121441	0.00723268	-0.193636	2.22747	1.63514e+09	0.420932	2.58216e+10	3.01114e+10
2007-01-05	6.55962	19	137946	337528044	94578	248560288	0.0263997	0.170578	0.102622	0.998343	1	1	0.000121093	0.00725133	-0.193567	2.22625	1.64782e+09	0.421959	2.59611e+10	3.02531e+10
2007-01-06	6.5665	19	137921	337615975	94545	248782618	0.0262271	0.170755	0.107852	0.996576	1	1	0.000121081	0.00750405	-0.193693	2.22974	1.65176e+09	0.421307	2.59794e+10	3.02689e+10
2007-01-07	6.5621	19	137775	336857375	94450	248017287	0.0263959	0.170812	0.108106	0.997659	1	1	0.000121205	0.00750997	-0.193655	2.2279	1.64359e+09	0.421643	2.59752e+10	3.0261e+10
2007-01-08	6.55545	19	138411	339712086	94937	250213574	0.0263947	0.171161	0.108401	0.997252	1	1	0.000120759	0.0076309	-0.193075	2.2255	1.65299e+09	0.422422	2.60555e+10	3.0358e+10
2007-01-09	6.55721	19	138768	341474127	95169	251458986	0.026402	0.171016	0.108471	0.997219	1	1	0.000120446	0.00760961	-0.19343	2.22771	1.66382e+09	0.422319	2.6064e+10	3.03716e+10
2007-01-10	6.56654	19	139174	345588135	95611	254182350	0.0264049	0.170395	0.108511	0.996968	1	1	0.000119847	0.00757101	-0.192683	2.27759	1.68795e+09	0.421853	2.61037e+10	3.04211e+10
2007-01-11	6.57461	19	140235	345541180	95522	253945705	0.0240169	0.170355	0.106187	0.993355	1	1	0.000119954	0.00757854	-0.192856	2.23742	1.69311e+09	0.421488	2.60527e+10	3.03718e+10
2007-01-12	6.55506	19	138948	338691547	94678	248713372	0.0236402	0.17145	0.102859	0.992617	1	1	0.000121232	0.00763075	-0.188563	2.23571	1.66672e+09	0.423705	2.60846e+10	3.04096e+10
2007-01-13	6.55788	19	138762	337904225	94559	248358490	0.0236091	0.171652	0.103923	0.992695	1	1	0.000121411	0.00763073	-0.188489	2.23696	1.66402e+09	0.423555	2.607e+10	3.03943e+10
2007-01-14	6.55871	19	138724	337747529	94535	248283052	0.0236138	0.17165	0.103617	0.99268	1	1	0.000121444	0.00763299	-0.188395	2.23682	1.66321e+09	0.42349	2.60706e+10	3.03948e+10
2007-01-15	6.54975	19	139189	340016880	94937	249771200	0.023634	0.171548	0.103761	0.992728	1	1	0.000121124	0.00772117	-0.188256	2.23112	1.67072e+09	0.424594	2.61855e+10	3.05141e+10
2007-01-16	6.5518	19	139669	342329896	95253	251419275	0.0236447	0.171375	0.103847	0.992734	1	1	0.000120706	0.00785234	-0.187618	2.23377	1.68472e+09	0.424419	2.63774e+10	3.08058e+10
2007-01-17	6.55627	19	139685	342563243	95359	252397119	0.0236388	0.17168	0.103591	0.99274	1	1	0.000120697	0.00785234	-0.187516	2.23606	1.68532e+09	0.42409	2.639e+10	3.08184e+10
2007-01-18	6.55555	19	139827	343062171	95336	252033243	0.0235354	0.172917	0.102585	0.992736	1	1	0.000120652	0.00784575	-0.187597	2.23263	1.68378e+09	0.424247	2.64681e+10	3.09028e+10
2007-01-19	6.55136	19	139804	342909988	95316	251717144	0.0235083	0.173248	0.102332	0.992781	1	1	0.000120733	0.00789718	-0.187061	2.23317	1.68468e+09	0.424804	2.6474e+10	3.09147e+10
2007-01-20	6.54869	19	139697	342502129	95248	251418882	0.023365	0.1734	0.102703	0.992759	1	1	0.000120894	0.00789153	-0.186725	2.23101	1.68259e+09	0.425448	2.65689e+10	3.10205e+10
2007-01-21	6.55094	19	139463	341415121	95085	250712412	0.023399	0.173281	0.102315	0.992759	1	1	0.000121091	0.00769181	-0.186605	2.23159	1.675e+09	0.425263	2.65596e+10	3.10112e+10
2007-01-22	6.54781	19	139947	343796791	95405	252350774	0.0233661	0.173425	0.102241	0.992726	1	1	0.000120709	0.00776674	-0.18592	2.23074	1.68624e+09	0.425718	2.65888e+10	3.10424e+10
2007-01-23	6.54978	19	140174	344975199	95554	253237726	0.023426	0.17339	0.103079	0.99287	1	1	0.000120551	0.00769188	-0.185686	2.23204	1.69271e+09	0.425676	2.6626e+10	3.10877e+10
2007-01-24	6.58681	19	141948	354675068	96600	260678062	0.0234448	0.171883	0.103108	0.992891	1	1	0.00011904	0.0076037	-0.190811	2.25019	1.752e+09	0.422735	2.66331e+10	3.10949e+10
2007-01-25	6.58636	19	142281	356293079	96814	261805086	0.0233957	0.171896	0.102674	0.992891	1	1	0.000118769	0.00738303	-0.191579	2.25155	1.75994e+09	0.422762	2.66478e+10	3.11102e+10
2007-01-26	6.59339	19	142258	355988048	96702	261690736	0.0233664	0.172052	0.102586	0.99285	1	1	0.000118924	0.00737067	-0.190423	2.26018	1.75823e+09	0.422453	2.66471e+10	3.11244e+10
2007-01-27	6.59412	19	142205	355753220	96663	261529444	0.0233358	0.172059	0.102481	0.992809	1	1	0.000118969	0.00737365	-0.190689	2.26055	1.75739e+09	0.422415	2.66371e+10	3.11121e+10
2007-01-28	6.59464	19	142317	356329329	96797	262574234	0.023349	0.172022	0.101984	0.992897	1	1	0.00011886	0.0073504	-0.190708	2.26084	1.76057e+09	0.422345	2.66433e+10	3.11225e+10
2007-01-29	6.60212	20	146228	358451729	97041	264131850	0.023349	0.173055	0.101099	0.992899	1	1	0.000118649	0.00735978	-0.190572	2.13809	1.71283e+09	0.422247	2.66636e+10	3.11458e+10
2007-01-30	6.59454	20	146684	360518056	97441	266710833	0.0233654	0.172804	0.101008	0.99285	1	1	0.000118309	0.00724693	-0.190133	2.13487	1.71966e+09	0.423046	2.67142e+10	3.12094e+10
2007-01-31	6.59088	20	146318	361214637	96873	267193674	0.0234032	0.172572	0.101619	0.992888	1	1	0.000118153	0.00710134	-0.19006	2.1217	1.75203e+09	0.423153	2.67359e+10	3.13379e+10
2007-02-01	6.59955	19	142789	362450175	96968	269500900	0.0234099	0.172544	0.100845	0.992787	1	1	0.000117923	0.00718845	-0.191312	2.24538	1.79804e+09	0.422063	2.68465e+10	3.14571e+10
2007-02-02	6.60753	19	143034	363997033	97110	270933692	0.0233749	0.171474	0.100988	0.992836	1	1	0.0001177	0.00713137	-0.191201	2.24723	1.80634e+09	0.421365	2.68594e+10	3.14703e+10
2007-02-03	6.60874	19	142981	363786683	97074	270855048	0.0232742	0.171466	0.101096	0.992852	1	1	0.000117726	0.0071356	-0.1914	2.24752	1.80545e+09	0.421238	2.69142e+10	3.15255e+10
2007-02-04	6.61242	19	142997	363919742	97066	271049280	0.0233048	0.171437	0.100105	0.992934	1	1	0.00011773	0.00713628	-0.191512	2.24598	1.80979e+09	0.421029	2.69139e+10	3.15252e+10
2007-02-05	6.61083	19	143386	365776915	97363	272639870	0.023299	0.171532	0.0998585	0.992974	1	1	0.000117403	0.00723952	-0.191214	2.24653	1.81915e+09	0.421106	2.69435e+10	3.1555e+10
2007-02-06	6.60344	19	143646	366898018	97581	273711530	0.0232063	0.171864	0.0998456	0.992874	1	1	0.000117219	0.00722174	-0.190586	2.24288	1.82183e+09	0.421876	2.69683e+10	3.15829e+10
2007-02-07	6.5977	19	143742	367274694	97633	273606372	0.0231771	0.171591	0.0982277	0.992953	1	1	0.000117132	0.00723474	-0.190702	2.23871	1.82448e+09	0.422393	2.69817e+10	3.16027e+10
2007-02-08	6.59686	19	144101	369040130	97885	274859062	0.0231045	0.171544	0.098246	0.993203	1	1	0.000116869	0.0072348	-0.191317	2.23919	1.83384e+09	0.422527	2.76288e+10	3.26542e+10
2007-02-09	6.59245	19	143881	367817334	97751	273797716	0.0230847	0.171819	0.0981003	0.993202	1	1	0.000117117	0.00728512	-0.191666	2.24204	1.82647e+09	0.423146	2.76325e+10	3.26659e+10
2007-02-10	6.59584	19	144179	369331500	98002	275688499	0.0230294	0.172451	0.0991517	0.993006	1	1	0.000116911	0.00736551	-0.191032	2.24028	1.83655e+09	0.423027	2.76693e+10	3.27045e+10
2007-02-11	6.59955	19	144113	369120405	97940	275571099	0.0229687	0.172298	0.100362	0.993325	1	1	0.000116909	0.00732688	-0.190838	2.24206	1.83708e+09	0.422554	2.76435e+10	3.26787e+10
2007-02-12	6.6061	19	144720	372427503	98329	278128718	0.0230026	0.172253	0.100673	0.99342	1	1	0.000116448	0.00731098	-0.190477	2.24395	1.85347e+09	0.422147	2.77094e+10	3.27488e+10
2007-02-13	6.60653	19	144884	373294089	98477	279206894	0.0229834	0.173106	0.101024	0.993464	1	1	0.000116309	0.00742762	-0.190025	2.2434	1.85747e+09	0.422105	2.77177e+10	3.27645e+10
2007-02-14	6.60586	19	145045	374099390	98602	279725849	0.0227772	0.173037	0.100725	0.993497	1	1	0.000116161	0.00745644	-0.189985	2.24281	1.86128e+09	0.422074	2.77627e+10	3.28196e+10
2007-02-15	6.60216	19	145235	374944431	98715	279903036	0.0227667	0.172696	0.100714	0.993484	1	1	0.000116037	0.00744386	-0.189846	2.24137	1.8635e+09	0.42241	2.78255e+10	3.29517e+10
2007-02-16	6.59841	19	145002	373536908	98548	278539945	0.0227482	0.174234	0.100223	0.993444	1	1	0.000116187	0.00756422	-0.189143	2.24318	1.856e+09	0.422613	2.78242e+10	3.29535e+10
2007-02-17	6.59993	19	144991	373482623	98540	278487520	0.0227725	0.174226	0.099644	0.993514	1	1	0.000116213	0.0075664	-0.189343	2.24441	1.85671e+09	0.422536	2.78341e+10	3.29634e+10
2007-02-18	6.60276	19	144976	373572398	98532	278796208	0.0227656	0.174307	0.0993342	0.993518	1	1	0.0001162	0.00756711	-0.189535	2.2442	1.85719e+09	0.422227	2.78414e+10	3.29707e+10
2007-02-19	6.60335	19	144894	373184212	98468	278496632	0.0227934	0.174293	0.0994736	0.993521	1	1	0.000116251	0.00757139	-0.189446	2.24462	1.85587e+09	0.422152	2.78363e+10	3.29614e+10
2007-02-20	6.60409	19	144840	372945115	98428	278321998	0.0227761	0.174266	0.0992649	0.993554	1	1	0.000116312	0.00757428	-0.189125	2.24499	1.85533e+09	0.422181	2.78537e+10	3.29788e+10
2007-02-21	6.60035	19	144324	370143351	98120	276136127	0.0227078	0.174371	0.0990326	0.993568	1	1	0.000116708	0.00760444	-0.18971	2.24472	1.84076e+09	0.422354	2.7798e+10	3.29268e+10
2007-02-22	6.60472	19	144203	369759093	98039	276185316	0.0227438	0.174517	0.0988169	0.993586	1	1	0.000116808	0.00761157	-0.189409	2.24499	1.83914e+09	0.422127	2.77932e+10	3.2922e+10
2007-02-23	6.60508	19	144061	369010750	97888	275307688	0.0226938	0.174682	0.0987616	0.993523	1	1	0.000116917	0.0076321	-0.18949	2.245	1.83487e+09	0.422066	2.77734e+10	3.28987e+10
2007-02-24	6.60618	19	144024	368862926	97860	275238468	0.0227171	0.174707	0.098672	0.993577	1	1	0.000116876	0.00763466	-0.189427	2.24525	1.83425e+09	0.421721	2.7771e+10	3.28963e+10
2007-02-25	6.62094	19	143906	369057326	97396	272145982	0.0226763	0.174916	0.0989166	0.993581	1	1	0.000116959	0.007643	-0.187887	2.24673	1.83658e+09	0.420753	2.77936e+10	3.29187e+10
2007-02-26	6.62364	19	144087	370048015	97486	272688694	0.0226821	0.17488	0.0992022	0.993545	1	1	0.000116801	0.00762484	-0.188175	2.2473	1.84172e+09	0.420473	2.77857e+10	3.2911e+10
2007-02-27	6.62137	19	144149	370271139	97531	272744646	0.0225714	0.174863	0.0977943	0.993609	1	1	0.000116753	0.00761673	-0.187637	2.24693	1.8422e+09	0.420657	2.78097e+10	3.29367e+10
2007-02-28	6.62246	19	144469	372084680	97781	274523858	0.02259	0.174856	0.0982168	0.99354	1	1	0.000116479	0.00766304	-0.187165	2.24579	1.85108e+09	0.420606	2.79893e+10	3.31788e+10
2007-03-01	6.63651	19	141418	381293242	95160	283038004	0.0225842	0.175288	0.0982592	0.99354	1	1	0.000115073	0.0075329	-0.185496	2.27692	1.90078e+09	0.419547	2.86992e+10	3.40828e+10
2007-03-02	6.64402	19	141302	378171606	94710	280610592	0.0225657	0.175148	0.0982956	0.993531	1	1	0.00011553	0.00756688	-0.184261	2.26533	1.88486e+09	0.418843	2.86537e+10	3.40353e+10
2007-03-03	6.63584	19	141275	377706244	94705	279818578	0.0225496	0.175004	0.0981108	0.9936	1	1	0.000115522	0.00756363	-0.184455	2.26449	1.8727e+09	0.419337	2.86562e+10	3.40388e+10
2007-03-04	6.62839	19	140963	375798246	94517	278259091	0.0225401	0.175057	0.0991996	0.993631	1	1	0.000115766	0.00757856	-0.184914	2.26198	1.86203e+09	0.419838	2.85834e+10	3.39432e+10
2007-03-05	6.62654	19	141310	377459713	94800	279830360	0.0225194	0.174864	0.0966259	0.993662	1	1	0.000115628	0.00760472	-0.184654	2.26338	1.87177e+09	0.42052	2.86101e+10	3.39716e+10
2007-03-06	6.63007	19	141593	379219230	94997	281247116	0.0225063	0.17572	0.0967462	0.993588	1	1	0.000115389	0.00759028	-0.184582	2.26503	1.88115e+09	0.42034	2.84751e+10	3.38153e+10
2007-03-07	6.61321	19	141571	379600165	95062	280561280	0.0225201	0.175138	0.0969486	0.993549	1	1	0.00011518	0.0076796	-0.183835	2.25281	1.88565e+09	0.4214	2.85901e+10	3.39877e+10
2007-03-08	6.61125	19	141908	381402595	95291	281638784	0.0225588	0.175048	0.0972554	0.993551	1	1	0.000114897	0.00768972	-0.184199	2.25366	1.89393e+09	0.421574	2.86434e+10	3.40413e+10
2007-03-09	6.60273	19	142038	381833313	95434	282046971	0.0225565	0.175248	0.0972779	0.993566	1	1	0.000114792	0.00758282	-0.184297	2.24876	1.8937e+09	0.422226	2.86681e+10	3.40665e+10
2007-03-10	6.59866	19	142158	382450197	96595	292875114	0.0225109	0.182423	0.0954935	0.993359	1	1	0.000114726	0.00762997	-0.183404	2.26437	1.90592e+09	0.423169	2.87246e+10	3.41297e+10
2007-03-11	6.59994	19	142010	381672252	96501	292361544	0.0225271	0.18236	0.0946214	0.993361	1	1	0.000114801	0.00752605	-0.183719	2.26488	1.90236e+09	0.422888	2.87202e+10	3.41251e+10
2007-03-12	6.59627	19	142429	383733544	96793	293788344	0.0225374	0.182408	0.0955665	0.993269	1	1	0.000114473	0.00759879	-0.183299	2.26346	1.91111e+09	0.423133	2.87657e+10	3.41788e+10
2007-03-13	6.59073	19	142576	384406777	96966	294768465	0.0225527	0.182458	0.0968383	0.993395	1	1	0.000114374	0.00765944	-0.183391	2.26102	1.91427e+09	0.423673	2.88025e+10	3.42164e+10
2007-03-14	6.58683	19	142711	385033504	97075	295235739	0.022437	0.182305	0.0972492	0.993365	1	1	0.000114299	0.00765055	-0.183104	2.26028	1.91676e+09	0.424136	2.88371e+10	3.42578e+10
2007-03-15	6.58589	19	143499	389406168	97744	298996461	0.0224544	0.182788	0.0972789	0.993483	1	1	0.000113769	0.00773783	-0.182755	2.26537	1.94452e+09	0.424846	2.89959e+10	3.45279e+10
2007-03-16	6.582	18	136235	389391061	86447	299889050	0.0224428	0.183995	0.0972749	0.993474	1	1	0.00011374	0.00782167	-0.182741	2.20064	1.95437e+09	0.425018	2.89856e+10	3.45034e+10
2007-03-17	6.58469	18	136778	389621850	86437	299980234	0.0224601	0.183814	0.0974043	0.993458	1	1	0.000113719	0.00798874	-0.182983	2.20478	1.95728e+09	0.424825	2.89852e+10	3.45029e+10
2007-03-18	6.58066	18	136489	389669975	86507	300390003	0.0223068	0.18425	0.0975203	0.993504	1	1	0.000113712	0.00802074	-0.182719	2.22021	1.95722e+09	0.42525	2.90074e+10	3.45251e+10
2007-03-19	6.57619	18	136635	390336176	86617	300768928	0.0223103	0.184376	0.0974462	0.993501	1	1	0.000113592	0.00800786	-0.182607	2.21806	1.95747e+09	0.425547	2.90079e+10	3.45257e+10
2007-03-20	6.57039	18	136985	393291678	86870	302585870	0.0222956	0.1841	0.0946176	0.993558	1	1	0.000113149	0.00834807	-0.182255	2.22384	1.96582e+09	0.426114	2.9132e+10	3.46498e+10
2007-03-21	6.56847	18	136828	392745660	86832	302098248	0.0223083	0.184127	0.0946253	0.993554	1	1	0.000113173	0.00836148	-0.182214	2.23037	1.96032e+09	0.426015	2.916e+10	3.46773e+10
2007-03-22	6.5638	18	136817	392538593	86860	302077392	0.0223002	0.184238	0.0948495	0.993552	1	1	0.00011321	0.00836476	-0.181975	2.22802	1.95597e+09	0.426492	2.91997e+10	3.47175e+10
2007-03-23	6.57584	18	136910	393833744	86930	304150223	0.0222887	0.184772	0.0943683	0.99354	1	1	0.000113128	0.00835967	-0.181672	2.22702	1.97478e+09	0.425826	2.92125e+10	3.47347e+10
2007-03-24	6.57546	18	136804	393235681	86855	303613749	0.0222611	0.1847	0.0936568	0.9935	1	1	0.000113227	0.00840014	-0.181501	2.22704	1.97211e+09	0.425923	2.92115e+10	3.47331e+10
2007-03-25	6.57787	18	136871	393739400	86881	304094066	0.0222555	0.184714	0.0950844	0.993508	1	1	0.000113157	0.00836382	-0.180809	2.22848	1.9769e+09	0.42578	2.92355e+10	3.47571e+10
2007-03-26	6.56693	18	136890	394019110	86904	304725530	0.022267	0.184959	0.094345	0.993496	1	1	0.000113097	0.00836039	-0.180567	2.21882	1.96917e+09	0.426762	2.92533e+10	3.47826e+10
2007-03-27	6.5641	18	137008	394712943	87148	305057364	0.0222912	0.184769	0.094289	0.993475	1	1	0.000112991	0.00839446	-0.180424	2.21942	1.9722e+09	0.427114	2.92642e+10	3.4812e+10
2007-03-28	6.56167	18	137319	395214845	87909	305389274	0.0223154	0.184766	0.0945654	0.993488	1	1	0.000112963	0.00836548	-0.17982	2.22234	1.97429e+09	0.427494	2.93077e+10	3.48571e+10
2007-03-29	6.55885	18	137260	394972742	87930	305761409	0.0222796	0.184914	0.0941318	0.993449	1	1	0.000113001	0.00831661	-0.17946	2.21831	1.97272e+09	0.427781	2.93321e+10	3.49356e+10
2007-03-30	6.55016	18	137617	396753251	88199	307195228	0.0223154	0.184968	0.093518	0.99344	1	1	0.000112757	0.00837511	-0.179182	2.21483	1.97838e+09	0.428689	2.93575e+10	3.49744e+10
2007-03-31	6.5653	18	137675	396226468	88521	307596626	0.0223315	0.185183	0.0935344	0.993433	1	1	0.000112829	0.00830022	-0.180081	2.22182	1.96629e+09	0.427144	2.97317e+10	3.53369e+10
2007-04-01	6.56962	18	139412	397787129	89199	310583908	0.0223454	0.186327	0.0935439	0.993443	1	1	0.000112303	0.00837571	-0.179851	2.18964	1.88186e+09	0.425559	2.98657e+10	3.5416e+10
2007-04-02	6.56947	18	139371	397705717	89155	310267082	0.0223329	0.186252	0.0934895	0.993443	1	1	0.000112406	0.0083979	-0.178994	2.1892	1.88332e+09	0.42597	2.98498e+10	3.5392e+10
2007-04-03	6.56152	18	139564	398525368	89547	313471508	0.0222325	0.188614	0.0936623	0.993449	1	1	0.000112261	0.00861137	-0.178601	2.18963	1.88759e+09	0.426678	2.98592e+10	3.54016e+10
2007-04-04	6.5623	18	139543	398500242	89552	313619424	0.0223195	0.188872	0.0941589	0.993499	1	1	0.000112306	0.00852124	-0.178616	2.18894	1.88751e+09	0.426719	2.98642e+10	3.54087e+10
2007-04-05	6.56221	18	140017	401320303	89863	316343466	0.0223323	0.189297	0.0943809	0.993526	1	1	0.000111892	0.00848836	-0.178926	2.18896	1.90146e+09	0.426675	2.99161e+10	3.54616e+10
2007-04-06	6.55884	18	140090	401767001	89943	316830072	0.0223419	0.189004	0.0931118	0.993574	1	1	0.000111783	0.00844526	-0.178892	2.18813	1.90255e+09	0.42684	2.99521e+10	3.54981e+10
2007-04-07	6.56017	18	140035	401485806	89901	316609236	0.0223303	0.189033	0.092941	0.993537	1	1	0.000111844	0.00844908	-0.178949	2.18867	1.90156e+09	0.426793	2.9948e+10	3.5494e+10
2007-04-08	6.56231	18	139934	401108721	89826	316450261	0.0223303	0.189163	0.0929959	0.993532	1	1	0.000111912	0.00845819	-0.177776	2.18928	1.90015e+09	0.42659	2.995e+10	3.54983e+10
2007-04-09	6.5616	18	140268	403026236	90024	317924196	0.0223279	0.189213	0.0929417	0.99352	1	1	0.000111644	0.00846521	-0.177693	2.18859	1.90977e+09	0.426642	2.99764e+10	3.55248e+10
2007-04-10	6.55321	18	140550	406297034	90285	320984212	0.0223291	0.189738	0.0929152	0.993487	1	1	0.0001112	0.00851874	-0.177775	2.19595	1.92291e+09	0.427534	3.01114e+10	3.56895e+10
2007-04-11	6.55583	18	140888	406386618	90291	321463631	0.0223267	0.19	0.0928686	0.993467	1	1	0.000111212	0.00851844	-0.177742	2.15528	1.92232e+09	0.427371	3.00861e+10	3.56624e+10
2007-04-12	6.54774	17	138128	406322275	90208	320914233	0.0222941	0.189763	0.0922986	0.993426	1	1	0.000111197	0.00849221	-0.1777	2.19106	1.9698e+09	0.42806	3.01212e+10	3.56985e+10
2007-04-13	6.54985	17	138255	406599131	90233	321145668	0.0221447	0.189897	0.0899462	0.993386	1	1	0.000111173	0.00848609	-0.177766	2.19267	1.97239e+09	0.42793	3.01224e+10	3.56997e+10
2007-04-14	6.54612	17	138064	405347136	90122	320150210	0.0221736	0.189923	0.0902121	0.993468	1	1	0.000111316	0.00837701	-0.177772	2.19125	1.96534e+09	0.428165	3.01173e+10	3.56945e+10
2007-04-15	6.54212	17	138161	405827657	90196	320414275	0.0221932	0.189634	0.0905489	0.993474	1	1	0.000111269	0.00836029	-0.177372	2.19032	1.96616e+09	0.42861	3.0161e+10	3.57344e+10
2007-04-16	6.53737	17	138520	407647903	90505	322273278	0.0221562	0.190323	0.0904431	0.993487	1	1	0.000110957	0.00843228	-0.178115	2.18978	1.97516e+09	0.428857	3.01954e+10	3.57682e+10
2007-04-17	6.53324	17	138492	407609256	90437	322030033	0.0221654	0.190244	0.0906135	0.993475	1	1	0.000110993	0.00843059	-0.177861	2.1849	1.97167e+09	0.429371	3.02131e+10	3.57903e+10
2007-04-18	6.5209	17	138695	408224372	90606	322130494	0.0221921	0.190215	0.090622	0.993491	1	1	0.000110896	0.00864039	-0.177113	2.18203	1.97442e+09	0.430649	3.04394e+10	3.60609e+10
2007-04-19	6.52068	17	138968	408137307	90596	322011728	0.0221863	0.189871	0.0906016	0.993505	1	1	0.000110948	0.00856944	-0.177072	2.17466	1.97348e+09	0.430801	3.04454e+10	3.60655e+10
2007-04-20	6.50412	17	139253	410236466	90866	323198596	0.0222304	0.189954	0.0906886	0.993514	1	1	0.000110623	0.00865055	-0.176582	2.17256	1.97168e+09	0.432242	3.05226e+10	3.61449e+10
2007-04-21	6.5055	17	139028	409008873	90715	322471086	0.0221991	0.190155	0.0906041	0.993515	1	1	0.00011078	0.0086647	-0.176404	2.17172	1.96565e+09	0.432032	3.04627e+10	36084132719
2007-04-22	6.50892	17	138995	408786114	91037	322783860	0.0220701	0.19058	0.0908281	0.993367	1	1	0.000110835	0.00866317	-0.176502	2.17414	1.97221e+09	0.43175	3.04602e+10	36081550339
2007-04-23	6.5074	17	139486	410589046	91328	325073418	0.0220781	0.191307	0.0910106	0.993397	1	1	0.000110576	0.00870536	-0.175781	2.17416	1.98152e+09	0.431949	3.05159e+10	3.61556e+10
2007-04-24	6.49245	17	139558	410156652	91213	323652201	0.0220871	0.190729	0.0909905	0.993388	1	1	0.000110525	0.00869967	-0.175475	2.17286	1.98016e+09	0.433016	3.05236e+10	3.61669e+10
2007-04-25	6.49317	18	142467	412980616	91598	327181294	0.022108	0.191991	0.0912364	0.993404	1	1	0.000110199	0.00876035	-0.175023	2.1401	2.01877e+09	0.433315	3.05513e+10	3.62106e+10
2007-04-26	6.49363	18	142273	412643370	91487	326243130	0.0221022	0.191438	0.09114	0.993409	1	1	0.000110233	0.00885546	-0.175636	2.13997	2.01674e+09	0.43312	3.05613e+10	3.62238e+10
2007-04-27	6.49314	18	142379	413344448	91549	326739992	0.0220987	0.191387	0.0913343	0.993414	1	1	0.000110156	0.00881852	-0.175772	2.13869	2.0196e+09	0.433279	3.05875e+10	3.6251e+10
2007-04-28	6.476	18	141910	414448779	91901	327608160	0.0221242	0.192191	0.0901926	0.993415	1	1	0.000109916	0.00887914	-0.174683	2.15758	2.00544e+09	0.434475	3.06447e+10	3.63189e+10
2007-04-29	6.47887	18	141721	414705892	91941	327953614	0.0222258	0.192226	0.0887215	0.993446	1	1	0.000109858	0.00887959	-0.173891	2.1807	2.00996e+09	0.434112	3.06414e+10	3.63299e+10
2007-04-30	6.47047	18	141894	417174792	92154	331187936	0.0222223	0.193884	0.0885721	0.993426	1	1	0.000109531	0.00892884	-0.173681	2.18324	2.017e+09	0.435106	3.07033e+10	3.63966e+10
2007-05-01	6.47808	18	141717	416856713	91946	329303381	0.0222376	0.192845	0.0878169	0.99348	1	1	0.000109371	0.00881	-0.173928	2.17853	2.0224e+09	0.43344	3.07315e+10	3.64691e+10
2007-05-02	6.47788	18	141205	413836749	91671	326736738	0.022247	0.192716	0.0891392	0.993504	1	1	0.000109751	0.00875362	-0.17414	2.17846	2.00709e+09	0.433336	3.06325e+10	3.63676e+10
2007-05-03	6.47927	18	141166	413705618	91635	326641324	0.0222212	0.192654	0.0890279	0.993497	1	1	0.000109786	0.00872328	-0.174168	2.17846	2.00821e+09	0.43327	3.06324e+10	3.63676e+10
2007-05-04	6.48149	18	141300	414506993	91723	327189286	0.0221827	0.192556	0.0894848	0.993553	1	1	0.000109681	0.00871634	-0.174096	2.18018	2.01161e+09	0.433056	3.06465e+10	3.63845e+10
2007-05-05	6.48464	18	141336	414854709	91740	327535802	0.0221944	0.192532	0.0898031	0.993566	1	1	0.00010965	0.00871481	-0.173981	2.18118	2.01423e+09	0.432816	3.06454e+10	3.63835e+10
2007-05-06	6.48468	18	141336	414857649	91740	327575618	0.0221697	0.192547	0.0912184	0.993526	1	1	0.000109635	0.0087148	-0.173984	2.18097	2.01428e+09	0.432755	3.06457e+10	3.63837e+10
2007-05-07	6.48078	18	141249	414388239	91716	327018766	0.0221838	0.192492	0.091294	0.993505	1	1	0.000109701	0.00872151	-0.173972	2.18018	2.00741e+09	0.433184	3.0645e+10	3.63816e+10
2007-05-08	6.47191	18	141712	417341477	92071	328671819	0.0220992	0.192156	0.0913826	0.993514	1	1	0.000109334	0.00870646	-0.173619	2.18156	2.01926e+09	0.434208	3.07823e+10	3.65411e+10
2007-05-09	6.4715	18	141797	417903250	92143	329257085	0.0220755	0.192331	0.0915354	0.993544	1	1	0.000109257	0.0086066	-0.173781	2.17925	2.02176e+09	0.434222	3.08442e+10	3.66117e+10
2007-05-10	6.46436	18	142567	422231031	92629	332318052	0.022065	0.192633	0.0914864	0.993539	1	1	0.000108707	0.0085927	-0.173973	2.17589	2.042e+09	0.43503	3.09554e+10	3.67445e+10
2007-05-11	6.46171	18	142504	421688671	92593	331640167	0.0220569	0.192509	0.0915527	0.993548	1	1	0.000108771	0.00855803	-0.173696	2.17551	2.03845e+09	0.435209	3.09245e+10	3.67066e+10
2007-05-12	6.46456	18	142531	422022284	92603	331966417	0.0220382	0.192471	0.0892407	0.993486	1	1	0.000108733	0.00853578	-0.173536	2.17577	2.04095e+09	0.434934	3.09311e+10	3.66778e+10
2007-05-13	6.46475	18	142432	421222265	92512	331464370	0.0215805	0.192567	0.0867147	0.993603	1	1	0.000108836	0.00853703	-0.173732	2.17411	2.03668e+09	0.434895	3.09249e+10	3.66716e+10
2007-05-14	6.47622	18	143200	424486931	92797	333987212	0.0214908	0.192407	0.0865816	0.993525	1	1	0.000108503	0.00847779	-0.173347	2.16908	2.05533e+09	0.434116	3.09468e+10	3.67012e+10
2007-05-15	6.45781	18	142998	425798032	92346	334023668	0.0215217	0.192079	0.0866092	0.993515	1	1	0.000108301	0.00862456	-0.172568	2.14378	2.0607e+09	0.435965	3.10082e+10	3.67938e+10
2007-05-16	6.45603	18	142980	425606947	92356	333686567	0.0215525	0.192147	0.0848578	0.993422	1	1	0.000108373	0.00877544	-0.1727	2.14447	2.06042e+09	0.436439	3.09693e+10	3.67724e+10
2007-05-17	6.4585	18	143054	426214288	92399	334366588	0.0215388	0.192259	0.0848495	0.993428	1	1	0.000108336	0.00876918	-0.173048	2.14404	2.06242e+09	0.436265	3.09943e+10	3.68262e+10
2007-05-18	6.45596	18	143325	427828878	92671	336651716	0.0215297	0.193219	0.0847556	0.993432	1	1	0.000108149	0.00875772	-0.172697	2.14407	2.07086e+09	0.436677	3.10401e+10	3.68734e+10
2007-05-19	6.4587	18	143169	427044197	92573	336208894	0.0214948	0.193251	0.084951	0.993449	1	1	0.000108234	0.00878265	-0.172723	2.14497	2.06819e+09	0.436345	3.10169e+10	3.68495e+10
2007-05-20	6.45183	18	143252	427554958	92639	336288084	0.0214462	0.193188	0.0851201	0.993392	1	1	0.000108156	0.00886667	-0.172822	2.1435	2.0658e+09	0.437018	3.10734e+10	3.69118e+10
2007-05-21	6.44833	17	140390	428512192	92718	336755201	0.0214531	0.192993	0.0850692	0.993394	1	1	0.000108037	0.00902206	-0.172936	2.19317	2.10028e+09	0.437529	3.10888e+10	3.69357e+10
2007-05-22	6.44401	17	140544	429191320	92829	337065126	0.0214611	0.192857	0.0851357	0.993412	1	1	0.000107966	0.00909755	-0.17303	2.19284	2.10212e+09	0.43805	3.10946e+10	3.69427e+10
2007-05-23	6.44583	17	140604	429758737	92846	337605614	0.0214897	0.193086	0.0852817	0.993427	1	1	0.000107914	0.00918284	-0.173072	2.19303	2.10705e+09	0.437992	3.11406e+10	3.69886e+10
2007-05-24	6.45014	17	141588	429674112	92854	337881656	0.0214759	0.192878	0.0851759	0.99341	1	1	0.00010794	0.00920785	-0.173115	2.15638	2.06532e+09	0.437685	3.1095e+10	3.69009e+10
2007-05-25	6.44037	17	141836	430957874	93109	339378725	0.0215012	0.193252	0.08579	0.99346	1	1	0.000107739	0.00942416	-0.172067	2.15236	2.06633e+09	0.438642	3.12158e+10	3.7049e+10
2007-05-26	6.43543	18	141694	429660459	93193	340687638	0.021523	0.195421	0.0851486	0.993416	1	1	0.000107847	0.00953922	-0.171888	2.15243	2.05053e+09	0.439007	3.12171e+10	3.70525e+10
2007-05-27	6.43607	18	141730	429851713	93211	340818574	0.0214811	0.195402	0.0855555	0.993454	1	1	0.000107817	0.0095228	-0.171933	2.15295	2.05147e+09	0.4389	3.12256e+10	3.70628e+10
2007-05-28	6.44305	18	146225	433525710	98535	343753512	0.0214335	0.195431	0.0857427	0.993454	1	1	0.000107443	0.00952991	-0.171856	2.20091	2.10763e+09	0.438565	3.13194e+10	3.71817e+10
2007-05-29	6.44566	18	146371	434524121	98618	344522590	0.0213972	0.195283	0.0848379	0.993419	1	1	0.000107343	0.00941744	-0.171739	2.20267	2.11468e+09	0.438433	3.13285e+10	3.71905e+10
2007-05-30	6.44628	18	146952	438392155	99021	347459055	0.0213975	0.195386	0.0846263	0.993479	1	1	0.000106914	0.00926029	-0.171862	2.20297	2.13229e+09	0.438557	3.13737e+10	3.72453e+10
2007-05-31	6.44743	18	146695	436291843	98797	345691460	0.0213872	0.193974	0.0847107	0.993482	1	1	0.0001071	0.0091951	-0.172263	2.20344	2.12168e+09	0.438165	3.12575e+10	3.7126e+10
2007-06-01	6.43615	18	147538	440108005	99487	349298095	0.0213792	0.194387	0.0846859	0.993478	1	1	0.000106637	0.00920883	-0.172418	2.20928	2.14537e+09	0.439608	3.15087e+10	3.74491e+10
2007-06-02	6.43372	18	146838	435888623	99006	345871789	0.0213861	0.194252	0.0846411	0.993424	1	1	0.000107134	0.00918867	-0.172923	2.20843	2.12462e+09	0.439763	3.13842e+10	3.73266e+10
2007-06-03	6.43407	18	146827	435837059	98993	345790558	0.0213838	0.194225	0.0834883	0.993387	1	1	0.000107137	0.00923137	-0.173107	2.2083	2.12408e+09	0.439721	3.13782e+10	3.73199e+10
2007-06-04	6.43202	18	146948	436747349	98819	343750474	0.0214309	0.192055	0.0835794	0.993378	1	1	0.000107049	0.00903996	-0.173635	2.2047	2.12593e+09	0.439991	3.13899e+10	3.73363e+10
2007-06-05	6.42706	18	147257	438284769	99021	344497656	0.0214389	0.192021	0.0835472	0.993362	1	1	0.00010687	0.00902455	-0.173397	2.20482	2.13404e+09	0.440584	3.13997e+10	3.73481e+10
2007-06-06	6.4235	18	147569	438567583	99044	344206822	0.021429	0.191439	0.0893599	0.993049	1	1	0.000106874	0.00901059	-0.172743	2.20625	2.13464e+09	0.441135	3.15425e+10	3.75349e+10
2007-06-07	6.41809	18	147661	438873326	99094	343916682	0.0214163	0.191085	0.0891275	0.993048	1	1	0.000106849	0.00903252	-0.173009	2.20444	2.1356e+09	0.441854	3.165e+10	3.76426e+10
2007-06-08	6.41682	18	148075	441190925	99398	345871600	0.0214048	0.191192	0.0886755	0.993026	1	1	0.000106623	0.00901559	-0.173002	2.20519	2.14712e+09	0.442247	3.17078e+10	3.77162e+10
2007-06-09	6.41739	18	147781	439500834	99208	344608732	0.0214486	0.19112	0.0887465	0.992955	1	1	0.000106859	0.00913341	-0.172767	2.20488	2.13938e+09	0.442327	3.16856e+10	3.76939e+10
2007-06-10	6.4094	18	147952	440605402	99509	346294136	0.0214544	0.192024	0.0887116	0.992944	1	1	0.000106699	0.00905707	-0.172708	2.20444	2.13744e+09	0.443084	3.17159e+10	3.77255e+10
2007-06-11	6.41063	18	148367	443174572	99791	348586556	0.0214695	0.192622	0.0884758	0.992967	1	1	0.000106368	0.00902945	-0.173145	2.2036	2.14827e+09	0.442823	3.17454e+10	3.7756e+10
2007-06-12	6.40638	18	147568	444312565	100092	350829872	0.0213936	0.194787	0.0882152	0.992784	1	1	0.00010622	0.00900778	-0.172815	2.2171	2.1541e+09	0.443247	3.24026e+10	3.84222e+10
2007-06-13	6.4007	18	147402	443165618	100008	349945796	0.0214229	0.19493	0.0882055	0.992764	1	1	0.000106379	0.00903752	-0.173321	2.21323	2.14577e+09	0.443905	3.2409e+10	3.84262e+10
2007-06-14	6.40193	18	147621	444532360	100142	350949835	0.0213986	0.194787	0.0876763	0.992609	1	1	0.000106238	0.00905622	-0.173146	2.21376	2.15282e+09	0.44388	3.24179e+10	3.84344e+10
2007-06-15	6.39978	18	150860	447556106	100827	356818134	0.0214021	0.198372	0.0877589	0.992664	1	1	0.000105928	0.00897167	-0.172054	2.17074	2.12237e+09	0.444626	3.24602e+10	3.84792e+10
2007-06-16	6.41554	19	152053	447445404	101016	357596607	0.0214125	0.198565	0.0878615	0.992639	1	1	0.000105993	0.00897602	-0.172606	2.20416	2.12811e+09	0.44323	3.24478e+10	3.84618e+10
2007-06-17	6.41326	19	151796	445772412	100858	356198051	0.0214252	0.198543	0.0877754	0.992568	1	1	0.000106202	0.00899368	-0.172646	2.20449	2.12031e+09	0.443492	3.24391e+10	3.84606e+10
2007-06-18	6.40957	19	152256	448468528	101193	358033236	0.0214357	0.198321	0.0879044	0.99256	1	1	0.000105874	0.00896383	-0.172902	2.20243	2.13367e+09	0.443875	3.257e+10	3.86846e+10
2007-06-19	6.40696	19	152477	450182491	101385	359421332	0.0214392	0.198434	0.0876801	0.992454	1	1	0.00010567	0.00893695	-0.172925	2.19644	2.14127e+09	0.444108	3.26005e+10	3.87165e+10
2007-06-20	6.39632	19	152785	452168645	101751	360764007	0.0214107	0.198441	0.0882346	0.992438	1	1	0.00010547	0.00895503	-0.172551	2.1918	2.15017e+09	0.445344	3.28643e+10	3.9016e+10
2007-06-21	6.39387	19	152586	450703983	101657	359953566	0.021406	0.198797	0.0882034	0.992436	1	1	0.000105566	0.00919717	-0.172885	2.18999	2.13994e+09	0.445334	3.28599e+10	3.89671e+10
2007-06-22	6.40038	19	152815	452227355	101786	361303878	0.0213933	0.19865	0.0882354	0.992442	1	1	0.000105431	0.00918208	-0.172928	2.1937	2.1521e+09	0.444894	3.28866e+10	3.89961e+10
2007-06-23	6.40249	19	152796	452224115	101780	361567066	0.0213668	0.198772	0.0882191	0.992432	1	1	0.000105445	0.00918443	-0.173252	2.19366	2.15398e+09	0.444765	3.28848e+10	3.89943e+10
2007-06-24	6.40047	19	152777	452005467	101774	361294294	0.0212942	0.198769	0.0878821	0.992245	1	1	0.000105449	0.00918474	-0.173428	2.1933	2.15243e+09	0.44486	3.28822e+10	3.8999e+10
2007-06-25	6.39917	19	153673	454198278	101977	362951686	0.021337	0.198737	0.087926	0.992248	1	1	0.000105214	0.00943184	-0.173601	2.18715	2.22901e+09	0.445093	3.29318e+10	3.90528e+10
2007-06-26	6.38079	19	150984	451981930	101767	360889485	0.0213509	0.19835	0.0882557	0.992101	1	1	0.000105391	0.00941715	-0.17444	2.20823	2.21916e+09	0.446482	3.2927e+10	3.90512e+10
2007-06-27	6.38144	19	151318	453928583	101974	362365870	0.0213695	0.198277	0.0893334	0.992059	1	1	0.000105133	0.00950897	-0.174789	2.20753	2.22822e+09	0.446253	3.29586e+10	3.90971e+10
2007-06-28	6.38763	19	152014	458492690	102266	364842838	0.0213637	0.197273	0.0893365	0.99205	1	1	0.000104661	0.00948989	-0.174531	2.21087	2.24899e+09	0.445909	3.3027e+10	3.91657e+10
2007-06-29	6.38574	19	152131	459045813	102356	365246571	0.0213428	0.197362	0.0888936	0.991971	1	1	0.000104601	0.00948146	-0.174871	2.21071	2.25105e+09	0.446133	3.30835e+10	3.92302e+10
2007-06-30	6.37859	19	152199	459449605	102159	365404871	0.0214055	0.197479	0.0880066	0.992031	1	1	0.000104524	0.00946384	-0.175342	2.20917	2.24959e+09	0.446837	3.31567e+10	3.93379e+10
2007-07-01	6.41049	19	151155	449670607	100880	355016084	0.0214207	0.1936	0.0851683	0.992044	1	1	0.000105777	0.00938111	-0.180833	2.19621	2.20899e+09	0.443832	3.28912e+10	3.90843e+10
2007-07-02	6.41785	19	152004	450491350	100925	355668022	0.0214417	0.193249	0.0852731	0.991968	1	1	0.000105706	0.00924989	-0.18047	2.21207	2.21594e+09	0.443124	3.28455e+10	3.90403e+10
2007-07-03	6.41333	19	152078	450934450	101016	355785668	0.0214176	0.193163	0.0857863	0.991969	1	1	0.000105684	0.00924022	-0.180589	2.20898	2.21843e+09	0.443742	3.2861e+10	3.90616e+10
2007-07-04	6.41349	19	152308	452315526	101192	357113229	0.0213294	0.193338	0.0876678	0.991926	1	1	0.000105534	0.00927847	-0.180423	2.20817	2.22545e+09	0.443753	3.29437e+10	3.91464e+10
2007-07-05	6.40762	19	152520	453195749	101389	357875900	0.0213446	0.193648	0.0879146	0.992066	1	1	0.000105452	0.00931098	-0.180603	2.20642	2.22978e+09	0.444434	3.29667e+10	3.91758e+10
2007-07-06	6.4039	19	152642	453618882	101380	358057150	0.0213376	0.194249	0.0876983	0.992308	1	1	0.000105391	0.00943249	-0.180005	2.20789	2.23165e+09	0.444849	3.29958e+10	3.92083e+10
2007-07-07	6.40768	19	152610	453657344	101342	358391488	0.0213621	0.194449	0.088043	0.992339	1	1	0.000105388	0.00943384	-0.180489	2.20838	2.23231e+09	0.444416	3.29964e+10	3.92089e+10
2007-07-08	6.40969	19	152735	454563348	101394	359039526	0.0213342	0.194311	0.0880526	0.992334	1	1	0.000105282	0.00943142	-0.180356	2.20775	2.23784e+09	0.444213	3.30187e+10	3.92699e+10
2007-07-09	6.41713	19	153302	458076361	101778	361420397	0.0213635	0.193841	0.087875	0.992342	1	1	0.000104925	0.00944779	-0.180169	2.21316	2.25404e+09	0.443706	3.30362e+10	3.92919e+10
2007-07-10	6.41226	19	153639	460414309	102016	363177146	0.021401	0.19413	0.0880833	0.992387	1	1	0.000104724	0.00945014	-0.179695	2.20561	2.26408e+09	0.444573	3.31029e+10	3.93602e+10
2007-07-11	6.4111	19	153694	460791527	102057	363460544	0.0214223	0.194189	0.0881564	0.992429	1	1	0.000104654	0.00948074	-0.179465	2.20227	2.26335e+09	0.44454	3.31275e+10	3.93978e+10
2007-07-12	6.41302	19	153592	461391071	101885	364752214	0.0214223	0.194783	0.0881098	0.992421	1	1	0.000104625	0.00932361	-0.179121	2.19042	2.26987e+09	0.444541	3.32365e+10	3.95348e+10
2007-07-13	6.41358	19	153743	462355434	101992	365666420	0.0213635	0.194933	0.0877954	0.99237	1	1	0.0001045	0.00940979	-0.179204	2.1914	2.27515e+09	0.444453	3.32449e+10	3.95443e+10
2007-07-14	6.41313	19	153522	461629808	101931	365054137	0.0209748	0.19496	0.0893911	0.992531	1	1	0.000104559	0.00942089	-0.179231	2.20399	2.26983e+09	0.444387	3.32369e+10	3.95024e+10
2007-07-15	6.41071	19	153793	463149855	102132	366265362	0.0210381	0.194987	0.0898121	0.992564	1	1	0.000104419	0.00946616	-0.178883	2.20298	2.27665e+09	0.444783	3.32648e+10	3.95502e+10
2007-07-16	6.39919	18	153213	463009725	102123	367430460	0.0210565	0.196302	0.0900553	0.992547	1	1	0.000104366	0.00952768	-0.178929	2.2041	2.24849e+09	0.445656	3.32884e+10	3.95742e+10
2007-07-17	6.39757	18	153231	463046855	102144	367472014	0.0210785	0.196239	0.0902755	0.992518	1	1	0.00010438	0.00948644	-0.17891	2.20413	2.24905e+09	0.445935	3.32672e+10	3.95607e+10
2007-07-18	6.37843	18	153630	463966125	103024	374479442	0.021111	0.201867	0.0910536	0.992528	1	1	0.00010413	0.00944534	-0.179265	2.20212	2.24896e+09	0.447363	3.33203e+10	3.96677e+10
2007-07-19	6.37547	18	153583	463596872	102959	373567384	0.0210387	0.201246	0.0908171	0.992479	1	1	0.000104212	0.00940357	-0.179434	2.20159	2.24756e+09	0.447883	3.33253e+10	3.96809e+10
2007-07-20	6.3711	18	153815	465125173	103086	374507186	0.0210318	0.20122	0.0908523	0.992498	1	1	0.000103997	0.00920777	-0.179393	2.19544	2.24942e+09	0.448204	3.33618e+10	3.9728e+10
2007-07-21	6.36861	18	153460	462867811	102883	372681032	0.0208843	0.201246	0.0899356	0.992497	1	1	0.000104237	0.00934371	-0.179069	2.19468	2.23886e+09	0.448381	3.33494e+10	3.97136e+10
2007-07-22	6.36709	18	153384	462373452	102839	372222964	0.0208901	0.201262	0.089992	0.992503	1	1	0.000104302	0.00934743	-0.179046	2.19396	2.23634e+09	0.448583	3.33717e+10	3.97359e+10
2007-07-23	6.36055	18	153556	463509972	102994	373726427	0.0208684	0.201782	0.0899922	0.99246	1	1	0.000104132	0.00947015	-0.179416	2.19396	2.24278e+09	0.449246	3.33837e+10	3.97484e+10
2007-07-24	6.36053	18	153705	464430310	103089	374292055	0.0208156	0.201611	0.0895459	0.992419	1	1	0.000104042	0.00937791	-0.179608	2.19443	2.24858e+09	0.449358	3.3409e+10	3.97776e+10
2007-07-25	6.35223	18	152824	465437958	103131	375198410	0.0208262	0.202058	0.088934	0.992342	1	1	0.000103899	0.00932018	-0.179555	2.18849	2.24808e+09	0.450092	3.3495e+10	3.98796e+10
2007-07-26	6.34929	18	152804	464991569	103081	374515953	0.0208043	0.20194	0.0889437	0.992336	1	1	0.000103944	0.00927064	-0.179812	2.18294	2.24004e+09	0.450361	3.3518e+10	3.99167e+10
2007-07-27	6.34863	18	153018	464943383	103557	374625332	0.0208078	0.202033	0.089681	0.992362	1	1	0.000103971	0.00927063	-0.180007	2.18745	2.23883e+09	0.450539	3.35282e+10	3.99339e+10
2007-07-28	6.34628	18	153052	465001919	103582	374520028	0.0208136	0.201967	0.0897836	0.992373	1	1	0.00010394	0.00923603	-0.180006	2.18685	2.23895e+09	0.450664	3.35321e+10	3.99386e+10
2007-07-29	6.34742	18	152938	464394189	103494	374044152	0.0208032	0.201944	0.0912568	0.992288	1	1	0.000104013	0.00924309	-0.180318	2.18731	2.23628e+09	0.450574	3.35275e+10	3.9934e+10
2007-07-30	6.34409	18	153232	466070866	103699	375208564	0.0208008	0.201738	0.0889281	0.992303	1	1	0.000103857	0.00923534	-0.179931	2.18722	2.24299e+09	0.451134	3.36962e+10	4.01058e+10
2007-07-31	6.37062	18	154521	466785004	102540	365302262	0.0208124	0.192427	0.0885582	0.992306	1	1	0.000103947	0.00921065	-0.182291	2.14989	2.25036e+09	0.448847	3.3719e+10	4.01249e+10
2007-08-01	6.36627	18	154799	469863863	101974	364413076	0.0207685	0.189925	0.0894509	0.99232	1	1	0.000103704	0.00882334	-0.182447	2.14563	2.26272e+09	0.449552	3.38769e+10	4.02885e+10
2007-08-02	6.36908	18	154508	468061587	101741	362948950	0.0206541	0.189784	0.0913362	0.992335	1	1	0.000103863	0.00868171	-0.182539	2.14876	2.25437e+09	0.449076	3.38906e+10	4.03045e+10
2007-08-03	6.36569	18	154611	468506841	101830	363244112	0.020629	0.189759	0.091394	0.992317	1	1	0.000103791	0.00866666	-0.182733	2.1475	2.25707e+09	0.449347	3.39109e+10	4.03308e+10
2007-08-04	6.36547	18	154516	467950709	101770	362826658	0.0206205	0.189754	0.0913433	0.992284	1	1	0.000103856	0.0086719	-0.182733	2.1473	2.25425e+09	0.449392	3.39536e+10	4.03735e+10
2007-08-05	6.36525	18	154465	467702897	101713	362460691	0.0204752	0.189659	0.0916279	0.992189	1	1	0.000103894	0.00867367	-0.18279	2.14708	2.25396e+09	0.449486	3.39223e+10	4.03426e+10
2007-08-06	6.35486	18	154190	468558147	101944	363530886	0.0204561	0.190202	0.0914549	0.992247	1	1	0.000103799	0.00861762	-0.183065	2.14829	2.20364e+09	0.450517	3.39596e+10	4.03857e+10
2007-08-07	6.35159	18	154248	469089054	101881	363634220	0.0204799	0.190292	0.0910615	0.992125	1	1	0.000103723	0.00856688	-0.183353	2.14512	2.20581e+09	0.450808	3.39627e+10	4.03924e+10
2007-08-08	6.34464	18	154128	470119255	102040	364237874	0.0204992	0.19067	0.0910289	0.992121	1	1	0.000103612	0.0085398	-0.183191	2.14835	2.20932e+09	0.45153	3.40178e+10	4.04587e+10
2007-08-09	6.34609	18	154184	470613143	102077	364611531	0.0204426	0.190602	0.0908708	0.992078	1	1	0.000103554	0.00851125	-0.183643	2.14715	2.21127e+09	0.451314	3.40225e+10	4.04667e+10
2007-08-10	6.33681	18	154942	474023516	102529	366733464	0.0204233	0.190361	0.0904877	0.992084	1	1	0.000103234	0.00872212	-0.185082	2.13744	2.22879e+09	0.452574	3.43685e+10	4.08192e+10
2007-08-11	6.33932	18	154747	473049272	102384	366059818	0.0203803	0.190347	0.0906377	0.992086	1	1	0.000103326	0.00860951	-0.185251	2.13765	2.22551e+09	0.452246	3.43595e+10	4.08098e+10
2007-08-12	6.33998	18	154743	473098310	102385	366194545	0.0202675	0.190311	0.0903357	0.991938	1	1	0.000103347	0.00855477	-0.185418	2.13754	2.22521e+09	0.452281	3.43628e+10	4.08129e+10
2007-08-13	6.34048	18	155181	475772810	102680	368287761	0.0201521	0.190308	0.0911049	0.992038	1	1	0.000103047	0.00861705	-0.185684	2.13703	2.23797e+09	0.452219	3.4395e+10	40881127590
2007-08-14	6.34042	18	155377	477011729	102801	369120631	0.0201274	0.190191	0.0914115	0.991914	1	1	0.000102911	0.00859409	-0.185725	2.13727	2.24387e+09	0.452229	3.44006e+10	40891245000
2007-08-15	6.33541	18	155930	480138670	103181	371172764	0.0201155	0.192746	0.0915479	0.991926	1	1	0.000102589	0.00872299	-0.185437	2.13458	2.25618e+09	0.452923	3.45516e+10	4.10612e+10
2007-08-16	6.33482	18	155812	479392384	103099	370639853	0.0200942	0.19288	0.091884	0.991881	1	1	0.000102706	0.00880161	-0.185207	2.13478	2.25317e+09	0.453182	3.45982e+10	4.11163e+10
2007-08-17	6.33212	18	155722	478720620	103034	369976659	0.0200831	0.192784	0.0916871	0.991911	1	1	0.000102747	0.00885926	-0.18524	2.13309	2.24696e+09	0.453268	3.46247e+10	4.11289e+10
2007-08-18	6.33096	18	155660	478399803	103012	369638166	0.0200875	0.192724	0.0909349	0.991842	1	1	0.00010279	0.0088568	-0.185336	2.13105	2.24457e+09	0.453396	3.4645e+10	4.11538e+10
2007-08-19	6.33016	18	155524	477560807	102924	368978270	0.0201121	0.192744	0.0909499	0.991857	1	1	0.000102858	0.00886403	-0.185438	2.13028	2.23981e+09	0.453356	3.46501e+10	4.11567e+10
2007-08-20	6.32747	18	156086	480940269	103338	371742078	0.0200855	0.192961	0.0913851	0.991831	1	1	0.000102533	0.00878926	-0.184991	2.12915	2.25697e+09	0.453855	3.47159e+10	4.12197e+10
2007-08-21	6.32305	18	156092	480838232	103321	371554747	0.0200421	0.192934	0.0911984	0.991807	1	1	0.000102503	0.00882707	-0.184708	2.12734	2.25505e+09	0.454186	3.47495e+10	4.13305e+10
2007-08-22	6.31975	18	156263	481756569	103518	373130562	0.0200276	0.193799	0.0912523	0.991779	1	1	0.000102398	0.00879981	-0.184809	2.12607	2.25856e+09	0.45457	3.47793e+10	4.13737e+10
2007-08-23	6.31468	18	156461	482697002	103653	373605104	0.0200153	0.192226	0.0913305	0.991792	1	1	0.0001023	0.00878146	-0.185434	2.1241	2.26044e+09	0.455104	3.47843e+10	4.13859e+10
2007-08-24	6.30688	18	156494	482802946	103728	373435748	0.0199862	0.192286	0.0911253	0.991817	1	1	0.000102243	0.00881222	-0.185213	2.1194	2.25761e+09	0.455736	3.47979e+10	4.14006e+10
2007-08-25	6.30253	18	156512	482859538	103733	373185862	0.0199862	0.192142	0.0918552	0.991828	1	1	0.000102226	0.00883949	-0.185196	2.1153	2.25661e+09	0.456202	3.48006e+10	4.14033e+10
2007-08-26	6.30279	18	156355	481865755	103577	371733992	0.0200444	0.191632	0.0919107	0.991807	1	1	0.000102336	0.00884991	-0.18572	2.11611	2.25197e+09	0.456167	3.47834e+10	4.13859e+10
2007-08-27	6.30148	18	156546	482935218	103706	372486249	0.0200703	0.191583	0.0920063	0.991823	1	1	0.000102258	0.00894145	-0.185819	2.11605	2.2575e+09	0.45647	3.48026e+10	4.14051e+10
2007-08-28	6.29974	18	156498	485144567	103937	373903351	0.0201264	0.191368	0.0939227	0.991837	1	1	0.000102063	0.00890299	-0.185601	2.1236	2.30017e+09	0.456808	3.48276e+10	4.14314e+10
2007-08-29	6.29524	18	156651	485970551	104023	374088964	0.0200839	0.191201	0.0942457	0.99188	1	1	0.000101926	0.00890615	-0.185567	2.11775	2.2957e+09	0.456984	3.48533e+10	4.14495e+10
2007-08-30	6.29204	18	156781	487053521	104167	374752618	0.0201008	0.191147	0.0945943	0.991836	1	1	0.000101848	0.00903522	-0.185648	2.11566	2.30101e+09	0.457508	3.49171e+10	4.15207e+10
2007-08-31	6.28435	18	156338	483803379	103967	372111257	0.0200907	0.191201	0.094572	0.991838	1	1	0.00010218	0.00895096	-0.186327	2.11699	2.28236e+09	0.458224	3.4902e+10	4.15155e+10
2007-09-01	6.27241	18	155990	486783965	103547	378227074	0.020102	0.195206	0.0948697	0.991828	1	1	0.000101954	0.00905984	-0.18688	2.11261	2.3008e+09	0.460166	3.54687e+10	4.28853e+10
2007-09-02	6.26724	18	155012	480466045	102944	373556868	0.0200572	0.1954	0.0949509	0.991831	1	1	0.000102609	0.00908406	-0.187611	2.10888	2.26932e+09	0.460627	3.54206e+10	4.28372e+10
2007-09-03	6.26283	18	155067	482457298	103240	375508117	0.0199404	0.195764	0.0954091	0.991874	1	1	0.000102432	0.00901097	-0.187378	2.12171	2.27712e+09	0.461258	3.54758e+10	4.28996e+10
2007-09-04	6.26051	18	155142	482745620	103290	375514226	0.019937	0.195654	0.0959069	0.991877	1	1	0.000102411	0.00900827	-0.187268	2.12183	2.27511e+09	0.461561	3.55191e+10	4.29527e+10
2007-09-05	6.25926	18	155353	484204422	103536	378277806	0.0199527	0.197015	0.0958138	0.991895	1	1	0.000102282	0.00907346	-0.186602	2.11468	2.28578e+09	0.46186	3.56029e+10	4.32066e+10
2007-09-06	6.25446	18	155279	483288942	103503	376952988	0.0199415	0.196773	0.0956849	0.991868	1	1	0.000102423	0.00918117	-0.187127	2.11762	2.28075e+09	0.46265	3.54666e+10	4.30701e+10
2007-09-07	6.25201	18	155296	483177585	103520	376745011	0.0199247	0.1968	0.0956033	0.991857	1	1	0.000102452	0.00920206	-0.1872	2.11866	2.28086e+09	0.463028	3.54966e+10	4.3107e+10
2007-09-08	6.25365	18	158421	482993034	107587	376553172	0.0196644	0.19668	0.095741	0.991853	1	1	0.000102466	0.00927627	-0.186905	2.15459	2.28302e+09	0.462892	3.5505e+10	4.31148e+10
2007-09-09	6.25518	18	158282	482256429	107492	376061092	0.0196944	0.196696	0.0954701	0.991845	1	1	0.000102551	0.00928547	-0.186857	2.15426	2.28079e+09	0.462759	3.55046e+10	4.31098e+10
2007-09-10	6.24508	19	160575	486610041	108245	380791862	0.0197112	0.197731	0.0952835	0.991846	1	1	0.00010213	0.00944851	-0.185761	2.129	2.30632e+09	0.464382	3.56244e+10	4.32609e+10
2007-09-11	6.24345	19	160867	488042800	108315	382245632	0.0197413	0.19783	0.0955529	0.991873	1	1	0.00010197	0.0094057	-0.185919	2.12435	2.31353e+09	0.464482	3.56427e+10	4.32807e+10
2007-09-12	6.23942	19	161135	489601731	108507	383296614	0.0197168	0.197776	0.0974973	0.99194	1	1	0.000101803	0.00950373	-0.185716	2.12213	2.32148e+09	0.464931	3.56644e+10	4.332e+10
2007-09-13	6.23706	19	160996	488792165	108398	382320930	0.0195295	0.197524	0.101473	0.992105	1	1	0.000101901	0.009519	-0.185895	2.11795	2.31963e+09	0.465341	3.56847e+10	4.33432e+10
2007-09-14	6.2356	19	161187	489849322	108554	383283344	0.0195362	0.197609	0.1016	0.992105	1	1	0.00010181	0.00947889	-0.185887	2.11708	2.32435e+09	0.465602	3.57065e+10	4.33685e+10
2007-09-15	6.2306	19	161287	490237516	108617	383132312	0.0195395	0.19725	0.101995	0.992143	1	1	0.000101756	0.0094686	-0.185812	2.11444	2.32412e+09	0.466107	3.57266e+10	4.33869e+10
2007-09-16	6.22716	19	161010	488405864	108462	381711403	0.0194063	0.197273	0.100035	0.991987	1	1	0.000101953	0.00948259	-0.185746	2.11199	2.31532e+09	0.466498	3.57194e+10	4.33843e+10
2007-09-17	6.22113	19	160979	489102263	108393	381802126	0.0193575	0.197161	0.100514	0.992023	1	1	0.000101888	0.00943579	-0.185742	2.11412	2.31937e+09	0.467301	3.57305e+10	4.34004e+10
2007-09-18	6.22013	19	161243	491054029	108604	383212498	0.019302	0.197092	0.100754	0.992055	1	1	0.000101707	0.00943833	-0.185544	2.11748	2.32775e+09	0.467512	3.5799e+10	4.34702e+10
2007-09-19	6.21983	19	161253	491107852	108617	383134247	0.019275	0.19691	0.100468	0.991896	1	1	0.000101723	0.0095319	-0.185619	2.11807	2.33312e+09	0.467699	3.58124e+10	4.34961e+10
2007-09-20	6.21108	18	159534	494171111	108306	386896867	0.0192674	0.198201	0.098963	0.991899	1	1	0.000101402	0.00950254	-0.185118	2.09843	2.34411e+09	0.468726	3.58615e+10	4.35592e+10
2007-09-21	6.20946	18	159383	493258889	108239	386129023	0.0192608	0.198105	0.0989647	0.991908	1	1	0.000101456	0.009491	-0.185474	2.09536	2.33938e+09	0.468726	3.58565e+10	4.35549e+10
2007-09-22	6.20927	18	159268	492539540	108166	385635440	0.0190495	0.198132	0.0989568	0.991891	1	1	0.000101526	0.00941878	-0.185561	2.09571	2.33651e+09	0.468702	3.58365e+10	4.3534e+10
2007-09-23	6.21945	18	159385	493190940	108097	386101464	0.0189907	0.197732	0.0990845	0.991918	1	1	0.000101501	0.00941186	-0.18551	2.09519	2.34579e+09	0.467781	3.58327e+10	4.35195e+10
2007-09-24	6.21609	18	159578	494099292	108227	386459277	0.0190501	0.197564	0.100061	0.991931	1	1	0.000101379	0.00939984	-0.185084	2.0952	2.3501e+09	0.468086	3.58937e+10	4.35838e+10
2007-09-25	6.2151	20	176004	496609934	126140	388123180	0.0190685	0.197406	0.10015	0.991941	1	1	0.000101176	0.00940151	-0.184543	2.22124	2.36451e+09	0.468543	3.60007e+10	4.40254e+10
2007-09-26	6.2191	20	176271	497872958	126325	389189080	0.0190398	0.197345	0.0978814	0.991917	1	1	0.000101078	0.00937699	-0.184009	2.21914	2.3739e+09	0.468202	3.60479e+10	4.40708e+10
2007-09-27	6.21527	20	176338	497959823	126491	390553607	0.0190301	0.198741	0.0980052	0.991896	1	1	0.000101073	0.00938734	-0.183964	2.21926	2.3743e+09	0.468767	3.6088e+10	4.41209e+10
2007-09-28	6.21285	20	176814	500917129	126792	392421947	0.0189505	0.198386	0.0971966	0.991907	1	1	0.000100803	0.00946377	-0.183623	2.21409	2.38761e+09	0.469258	3.61344e+10	4.41765e+10
2007-09-29	6.21771	20	177076	502652087	126977	394096918	0.0188797	0.198558	0.0969596	0.991848	1	1	0.000100602	0.00946044	-0.183614	2.21433	2.39389e+09	0.468559	3.55e+10	4.33776e+10
2007-09-30	6.21191	20	177232	504001504	127083	395027806	0.0188335	0.19866	0.0972284	0.991852	1	1	0.00010051	0.00940886	-0.183451	2.21495	2.39875e+09	0.46944	3.55894e+10	4.3549e+10
2007-10-01	6.20168	21	179540	499858997	126349	390147721	0.0187301	0.197443	0.0971595	0.991858	1	1	0.000100841	0.00944391	-0.185162	2.09015	2.32378e+09	0.469972	3.55754e+10	4.35289e+10
2007-10-02	6.20506	21	179233	498321068	126168	389139294	0.0188416	0.197452	0.0951688	0.991814	1	1	0.000100959	0.00925226	-0.185003	2.09178	2.31753e+09	0.469389	3.55543e+10	4.35073e+10
2007-10-03	6.20456	21	179206	498123739	126145	388903862	0.0188438	0.197384	0.094707	0.991837	1	1	0.000100984	0.00924977	-0.185177	2.09204	2.30389e+09	0.469522	3.55563e+10	4.35093e+10
2007-10-04	6.20456	21	179206	498123242	126145	388902868	0.0187841	0.197376	0.0946957	0.991843	1	1	0.000100984	0.00924976	-0.185187	2.09204	2.30389e+09	0.469523	3.55567e+10	4.35097e+10
2007-10-05	6.20395	21	179150	497760414	126107	388558944	0.0187744	0.197356	0.0946785	0.991837	1	1	0.000101036	0.00924047	-0.18527	2.09216	2.30211e+09	0.469664	3.55542e+10	4.3507e+10
2007-10-06	6.20419	21	179134	497700549	126095	388525128	0.0186818	0.197359	0.093924	0.991898	1	1	0.000101045	0.00932044	-0.185259	2.09231	2.302e+09	0.469665	3.55553e+10	4.35105e+10
2007-10-07	6.20584	21	179175	498069416	126107	388726362	0.0185945	0.197134	0.094051	0.991923	1	1	0.000100997	0.0093075	-0.185478	2.09201	2.30358e+09	0.469378	3.55696e+10	4.35249e+10
2007-10-08	6.1896	21	179616	499356875	126438	388448927	0.0186364	0.196576	0.0942317	0.991878	1	1	0.000100851	0.00939273	-0.184856	2.08908	2.3071e+09	0.471313	3.56657e+10	4.36294e+10
2007-10-09	6.18949	21	179664	499662295	126447	388588049	0.0186419	0.196503	0.0940796	0.991879	1	1	0.000100837	0.00933716	-0.185151	2.08803	2.3073e+09	0.471376	3.56778e+10	4.36423e+10
2007-10-10	6.1773	21	180182	501743965	126888	390175902	0.0186408	0.196597	0.0941243	0.99188	1	1	0.000100658	0.00930729	-0.185858	2.08619	2.31576e+09	0.473026	3.58814e+10	4.38768e+10
2007-10-11	6.17261	21	179998	500498740	126763	389042525	0.0186386	0.196577	0.0941897	0.991881	1	1	0.000100764	0.00912833	-0.185738	2.08351	2.29896e+09	0.473449	3.58792e+10	4.38763e+10
2007-10-12	6.17676	21	180329	502724112	126739	387963660	0.0186	0.194526	0.09387	0.991856	1	1	0.00010057	0.0091032	-0.185625	2.08217	2.30835e+09	0.473066	3.59369e+10	4.39618e+10
2007-10-13	6.17868	21	180205	502092420	126645	387604953	0.0186151	0.194463	0.0942219	0.991984	1	1	0.000100648	0.00911272	-0.186054	2.08563	2.30779e+09	0.472932	3.59398e+10	4.39604e+10
2007-10-14	6.18445	21	180176	502324837	126511	386863800	0.0185583	0.194057	0.0938197	0.992041	1	1	0.000100628	0.00909727	-0.186136	2.08662	2.30925e+09	0.472221	3.59334e+10	4.3954e+10
2007-10-15	6.18193	21	180899	506384277	127084	390854954	0.018581	0.19405	0.0946699	0.992048	1	1	0.00010025	0.00915464	-0.185641	2.08621	2.33155e+09	0.472753	3.60606e+10	4.41141e+10
2007-10-16	6.1706	21	180930	505771651	127805	398065250	0.0185252	0.198799	0.0944407	0.992049	1	1	0.000100249	0.00923767	-0.185301	2.08391	2.32635e+09	0.4739	3.60822e+10	4.41412e+10
2007-10-17	6.17013	21	180914	505733398	127807	398168000	0.0184402	0.198888	0.0946636	0.99208	1	1	0.000100236	0.00923759	-0.185686	2.08345	2.32567e+09	0.473861	3.60795e+10	4.41419e+10
2007-10-18	6.15881	21	181023	505752460	128057	398977016	0.0184327	0.199838	0.0946146	0.992079	1	1	0.000100238	0.00922828	-0.185631	2.07396	2.31469e+09	0.475056	3.61109e+10	4.42197e+10
2007-10-19	6.15886	21	181052	505914551	128083	399115884	0.0184188	0.199687	0.0949751	0.992073	1	1	0.000100273	0.00919603	-0.185608	2.07455	2.31464e+09	0.475283	3.61155e+10	4.42353e+10
2007-10-20	6.14238	20	175812	503616683	127486	396937824	0.0183347	0.200011	0.0957251	0.992112	1	1	0.000100431	0.00918166	-0.185763	2.17322	2.29184e+09	0.476658	3.61262e+10	4.42421e+10
2007-10-21	6.14713	20	175704	503376391	127311	395981030	0.0180502	0.198996	0.0958359	0.992132	1	1	0.000100422	0.00907101	-0.185883	2.17361	2.29135e+09	0.475862	3.61218e+10	4.42385e+10
2007-10-22	6.14087	20	176006	504593722	127542	396417084	0.0180078	0.198717	0.0967285	0.992114	1	1	0.000100333	0.00904893	-0.185194	2.1732	2.29111e+09	0.476841	3.61806e+10	4.43019e+10
2007-10-23	6.1396	20	176234	505749419	127702	397090862	0.0179862	0.198598	0.0964023	0.992101	1	1	0.000100192	0.00906137	-0.184695	2.17303	2.29659e+09	0.476914	3.62219e+10	4.43461e+10
2007-10-24	6.13807	20	176461	506964212	127880	398076929	0.0178215	0.198716	0.0970535	0.992136	1	1	0.000100067	0.00904378	-0.184294	2.17211	2.30203e+09	0.47703	3.62468e+10	4.43735e+10
2007-10-25	6.14213	20	177258	511412228	128419	401487421	0.0178361	0.198668	0.0987148	0.992273	1	1	9.96703e-05	0.0091853	-0.184025	2.17463	2.32758e+09	0.476823	3.63628e+10	4.44999e+10
2007-10-26	6.14538	20	177498	512873377	128587	402757274	0.0178758	0.198874	0.0983905	0.992263	1	1	9.95049e-05	0.00921176	-0.183889	2.17669	2.33728e+09	0.476371	3.64107e+10	4.45496e+10
2007-10-27	6.14351	20	177422	512161545	128599	402471749	0.0178925	0.199274	0.0988631	0.992266	1	1	9.95829e-05	0.00921722	-0.183822	2.17706	2.33348e+09	0.476668	3.6421e+10	4.45783e+10
2007-10-28	6.1418	20	177473	512415657	128634	402571254	0.0179009	0.199268	0.098935	0.992291	1	1	9.95537e-05	0.00927046	-0.183516	2.17498	2.33299e+09	0.476855	3.64378e+10	4.45952e+10
2007-10-29	6.1455	20	178072	515984344	129053	405401038	0.0178026	0.199175	0.100166	0.992328	1	1	9.92285e-05	0.0092194	-0.182968	2.17728	2.35071e+09	0.476525	3.64968e+10	4.4673e+10
2007-10-30	6.14253	20	178824	519962676	129589	408023596	0.0178487	0.199125	0.101422	0.992366	1	1	9.88529e-05	0.00929596	-0.182769	2.17867	2.36187e+09	0.476963	3.65491e+10	4.47404e+10
2007-10-31	6.15148	20	178499	518880633	129087	405196966	0.0178865	0.197662	0.101715	0.992365	1	1	9.8907e-05	0.00942035	-0.183873	2.17782	2.36002e+09	0.475578	3.65591e+10	4.47527e+10
2007-11-01	6.15607	20	178459	519668159	129194	408815462	0.0178813	0.199089	0.101831	0.992371	1	1	9.90204e-05	0.00960007	-0.182616	2.18613	2.36739e+09	0.476048	3.67737e+10	4.49721e+10
2007-11-02	6.15336	20	178437	519199370	129170	408036447	0.0178855	0.198975	0.102305	0.9924	1	1	9.90365e-05	0.00954358	-0.182175	2.18811	2.36646e+09	0.476272	3.67913e+10	4.50181e+10
2007-11-03	6.15534	20	178429	519286197	129147	408063774	0.0178833	0.198884	0.100647	0.99236	1	1	9.90458e-05	0.00954093	-0.182031	2.18835	2.36729e+09	0.47611	3.68131e+10	4.50339e+10
2007-11-04	6.15635	20	178421	519292014	129139	408123946	0.0178297	0.19887	0.0989492	0.992308	1	1	9.90374e-05	0.00954387	-0.182048	2.18873	2.36746e+09	0.475951	3.68118e+10	4.50326e+10
2007-11-05	6.14868	20	178827	521123324	129792	413523868	0.0178519	0.202057	0.0991253	0.992317	1	1	9.88908e-05	0.00964304	-0.181531	2.18695	2.37477e+09	0.477032	3.6877e+10	4.51097e+10
2007-11-06	6.14679	20	179000	522324741	129900	414245347	0.0178709	0.201919	0.09949	0.992427	1	1	9.87801e-05	0.00965413	-0.181155	2.19174	2.38138e+09	0.477306	3.69562e+10	4.51933e+10
2007-11-07	6.14576	20	179210	523439850	130071	415228160	0.0178952	0.202021	0.0994855	0.992419	1	1	9.86706e-05	0.00967063	-0.181292	2.19225	2.38622e+09	0.477406	3.69821e+10	4.52623e+10
2007-11-08	6.14356	20	179433	524616159	130254	416052337	0.0179005	0.201714	0.0995538	0.992417	1	1	9.8578e-05	0.0096161	-0.18111	2.19357	2.3942e+09	0.477782	3.70534e+10	4.53541e+10
2007-11-09	6.13691	20	179096	524048552	130317	415701263	0.0179068	0.201979	0.100138	0.992461	1	1	9.85663e-05	0.00962549	-0.181541	2.21378	2.38554e+09	0.47823	3.70837e+10	4.54072e+10
2007-11-10	6.13656	20	179083	523938507	130312	415634106	0.0179143	0.202099	0.100752	0.992526	1	1	9.85931e-05	0.00964651	-0.181279	2.21435	2.38635e+09	0.478393	3.70909e+10	4.54139e+10
2007-11-11	6.13164	20	178882	522717448	130203	414811844	0.0178826	0.202338	0.101087	0.992566	1	1	9.86972e-05	0.0096661	-0.181297	2.21362	2.38328e+09	0.47889	3.70819e+10	4.54069e+10
2007-11-12	6.12709	20	179182	524250852	130473	416170152	0.0178126	0.20238	0.100793	0.992745	1	1	9.85867e-05	0.00966933	-0.181191	2.21219	2.38897e+09	0.479612	3.70853e+10	4.54205e+10
2007-11-13	6.12635	20	179416	525631461	130642	417209822	0.0178593	0.202297	0.104785	0.992873	1	1	9.84849e-05	0.00958375	-0.181146	2.2108	2.39338e+09	0.479725	3.71187e+10	4.54572e+10
2007-11-14	6.1252	20	179415	525532760	130635	416933820	0.0179119	0.202191	0.105374	0.992883	1	1	9.85257e-05	0.00967351	-0.181102	2.21032	2.39222e+09	0.479998	3.71273e+10	4.54693e+10
2007-11-15	6.11596	20	179825	528833798	130873	418805167	0.0179076	0.202058	0.105262	0.992878	1	1	9.81909e-05	0.0103858	-0.179967	2.21615	2.4225e+09	0.481053	3.72615e+10	4.56163e+10
2007-11-16	6.11135	20	179726	527953370	130802	417703845	0.0178861	0.201921	0.104972	0.992879	1	1	9.82574e-05	0.0104657	-0.179974	2.21512	2.41589e+09	0.481497	3.72767e+10	4.56341e+10
2007-11-17	6.11063	20	179657	527488983	130760	417372606	0.0178508	0.201966	0.105132	0.99288	1	1	9.82917e-05	0.0104705	-0.180061	2.21468	2.41333e+09	0.48155	3.72401e+10	4.55997e+10
2007-11-18	6.1095	20	179593	527070811	130716	416993078	0.0178712	0.20188	0.105525	0.992882	1	1	9.83399e-05	0.0104788	-0.179876	2.21443	2.41092e+09	0.481747	3.72599e+10	4.56227e+10
2007-11-19	6.10355	20	179808	528402800	130874	417817719	0.0178831	0.201781	0.105603	0.99288	1	1	9.82159e-05	0.0105362	-0.179545	2.20521	2.41257e+09	0.482418	3.72908e+10	4.56549e+10
2007-11-20	6.09503	20	180211	530154698	131196	418747796	0.0178303	0.201766	0.105571	0.992866	1	1	9.81054e-05	0.0106598	-0.179086	2.20371	2.41967e+09	0.483774	3.73871e+10	4.58148e+10
2007-11-21	6.08517	20	180500	530984166	131485	419358870	0.0178583	0.20196	0.105961	0.992873	1	1	9.79026e-05	0.0106739	-0.178709	2.20424	2.42184e+09	0.484307	3.74347e+10	4.58683e+10
2007-11-22	6.08465	20	180721	532225498	131597	419621519	0.0178551	0.201496	0.106367	0.992899	1	1	9.78088e-05	0.0106388	-0.17816	2.20488	2.42599e+09	0.484487	3.74761e+10	4.59198e+10
2007-11-23	6.0818	20	180785	532538776	131631	419496564	0.0178486	0.201429	0.107299	0.992894	1	1	9.78025e-05	0.010645	-0.1782	2.20381	2.42635e+09	0.484943	3.75542e+10	4.59943e+10
2007-11-24	6.08113	20	180816	532641287	131650	419445190	0.0178638	0.201362	0.107691	0.992922	1	1	9.77843e-05	0.010645	-0.178131	2.20411	2.42701e+09	0.484993	3.75506e+10	4.60063e+10
2007-11-25	6.06814	20	180596	531182888	131609	419078864	0.0178758	0.202411	0.107821	0.992928	1	1	9.78149e-05	0.010719	-0.178203	2.18301	2.40362e+09	0.485896	3.75576e+10	4.6011e+10
2007-11-26	6.06271	20	180606	531429241	131617	419186990	0.0178726	0.202522	0.107946	0.992934	1	1	9.78074e-05	0.0106984	-0.177632	2.18264	2.404e+09	0.486659	3.75951e+10	4.6048e+10
2007-11-27	6.06379	20	180951	533452404	131868	420819718	0.0178054	0.202641	0.107582	0.99291	1	1	9.763e-05	0.0106786	-0.177471	2.18307	2.41342e+09	0.486557	3.76141e+10	4.60579e+10
2007-11-28	6.05449	17	158024	534804987	106335	423113678	0.0177534	0.204088	0.108396	0.992942	1	1	9.74489e-05	0.0106637	-0.177124	1.98235	2.39358e+09	0.487342	3.76403e+10	4.61104e+10
2007-11-29	6.05259	17	159257	534637609	106321	422885258	0.0177512	0.204039	0.108361	0.992942	1	1	9.74942e-05	0.0106659	-0.177099	2.01014	2.3938e+09	0.487736	3.76281e+10	4.61006e+10
2007-11-30	6.05597	17	162492	538483210	107794	425596172	0.0177437	0.203891	0.109683	0.992951	1	1	9.73073e-05	0.0107916	-0.177048	2.00972	2.41968e+09	0.48826	3.77755e+10	4.63159e+10
2007-12-01	6.04759	19	173421	540322231	122574	424636598	0.0177524	0.202261	0.109863	0.99296	1	1	9.71218e-05	0.0109655	-0.177477	2.12085	2.4459e+09	0.489172	3.79499e+10	4.63818e+10
2007-12-02	6.05487	19	172742	536691471	122082	422399277	0.0178469	0.203083	0.110156	0.992927	1	1	9.74453e-05	0.0108714	-0.177259	2.12209	2.43169e+09	0.488158	3.78822e+10	4.63134e+10
2007-12-03	6.04495	19	172491	538471735	121880	426468734	0.017849	0.205247	0.110085	0.992924	1	1	9.72952e-05	0.0108823	-0.176667	2.09923	2.4394e+09	0.489504	3.79205e+10	4.63591e+10
2007-12-04	6.04987	19	172868	541253670	122136	428786727	0.0178555	0.205156	0.110091	0.992927	1	1	9.7075e-05	0.01087	-0.176404	2.10359	2.45373e+09	0.489106	3.79414e+10	4.64111e+10
2007-12-05	6.04874	19	173231	543501970	122469	431638224	0.0178544	0.206438	0.110131	0.992927	1	1	9.69003e-05	0.0110323	-0.175699	2.10355	2.46469e+09	0.48942	3.79852e+10	4.6509e+10
2007-12-06	6.05239	19	173410	544884780	122617	433325499	0.0178501	0.206637	0.11021	0.992929	1	1	9.67793e-05	0.0110008	-0.175377	2.10358	2.47228e+09	0.48897	3.80259e+10	4.65621e+10
2007-12-07	6.04631	19	172944	541744379	122317	430738638	0.017822	0.206744	0.110062	0.99294	1	1	9.70528e-05	0.0110284	-0.175925	2.09997	2.45688e+09	0.489628	3.80344e+10	4.65786e+10
2007-12-08	6.04683	19	172968	540901267	122362	429869670	0.017823	0.206578	0.110135	0.992935	1	1	9.7123e-05	0.010942	-0.176208	2.1074	2.45461e+09	0.489516	3.80055e+10	4.65494e+10
2007-12-09	6.04811	19	172900	540530616	122310	429607982	0.0178176	0.206683	0.110557	0.992941	1	1	9.71375e-05	0.0107186	-0.176438	2.10788	2.4546e+09	0.489256	3.79816e+10	4.65249e+10
2007-12-10	6.04082	19	173319	542951986	122702	431982404	0.0179053	0.207473	0.110293	0.992921	1	1	9.69771e-05	0.010714	-0.174998	2.10464	2.43839e+09	0.490569	3.81182e+10	4.66712e+10
2007-12-11	6.04055	19	173303	542928139	122696	432028566	0.0177169	0.207698	0.110927	0.993046	1	1	9.69604e-05	0.0107023	-0.174925	2.10309	2.43566e+09	0.49049	3.80926e+10	4.66457e+10
2007-12-12	6.06622	19	175936	550207709	123481	440878895	0.0176434	0.208807	0.110742	0.993093	1	1	9.65471e-05	0.0108946	-0.174328	2.09432	2.51001e+09	0.489238	3.8142e+10	4.67153e+10
2007-12-13	6.06805	19	175932	550291955	123465	440934738	0.0176541	0.208768	0.110734	0.993086	1	1	9.65835e-05	0.0110389	-0.174028	2.0967	2.51442e+09	0.48933	3.81208e+10	4.67284e+10
2007-12-14	6.06484	19	176039	551063192	123579	441409093	0.0177008	0.208863	0.110765	0.993083	1	1	9.64909e-05	0.0110356	-0.173895	2.09475	2.50952e+09	0.489488	3.81586e+10	4.67678e+10
2007-12-15	6.06391	19	176286	552123586	123719	442560332	0.0176467	0.209224	0.111078	0.993093	1	1	9.63896e-05	0.0111722	-0.173536	2.09436	2.51554e+09	0.489603	3.81709e+10	4.67814e+10
2007-12-16	6.06587	19	175917	550012255	123403	440505119	0.0176595	0.20899	0.11121	0.993097	1	1	9.65097e-05	0.0112531	-0.174339	2.09485	2.50725e+09	0.489027	3.81387e+10	4.67453e+10
2007-12-17	6.06368	19	176246	551939473	123643	441993324	0.0176606	0.208963	0.110781	0.993107	1	1	9.63688e-05	0.0112595	-0.174799	2.09306	2.51479e+09	0.489423	3.83166e+10	4.6932e+10
2007-12-18	6.06644	19	176741	555797186	124048	444653456	0.0176949	0.208619	0.110844	0.993114	1	1	9.60598e-05	0.0112559	-0.174246	2.09746	2.53962e+09	0.489374	3.83741e+10	4.70082e+10
2007-12-19	6.06544	19	176746	555869989	124027	444199583	0.017695	0.208625	0.113679	0.993129	1	1	9.61078e-05	0.0112938	-0.174618	2.0971	2.53747e+09	0.489795	3.85284e+10	4.71694e+10
2007-12-20	6.05096	19	177005	556511244	124296	444529344	0.0176875	0.209018	0.113587	0.993159	1	1	9.59963e-05	0.0113606	-0.17477	2.09284	2.52997e+09	0.491182	3.86468e+10	4.72896e+10
2007-12-21	6.05089	19	176460	553963603	123880	441381482	0.0176204	0.207874	0.113665	0.993163	1	1	9.62073e-05	0.0112099	-0.17554	2.09553	2.51672e+09	0.491076	3.85893e+10	4.72224e+10
2007-12-22	6.05114	19	176220	552513855	123707	440206480	0.0176214	0.20783	0.113369	0.993148	1	1	9.63433e-05	0.0112174	-0.175561	2.09566	2.51011e+09	0.491106	3.85792e+10	4.72185e+10
2007-12-23	6.04832	19	175799	549806997	123406	437792306	0.0176365	0.207663	0.104951	0.993157	1	1	9.6591e-05	0.0112548	-0.1758	2.0935	2.49453e+09	0.491504	3.82777e+10	4.69169e+10
2007-12-24	6.0432	19	175976	550646127	123679	439994754	0.017644	0.209324	0.102623	0.993211	1	1	9.65542e-05	0.0113293	-0.17587	2.09404	2.49921e+09	0.492371	3.83239e+10	4.69627e+10
2007-12-25	6.04649	19	176473	553970050	124017	442786068	0.0176656	0.209262	0.102516	0.993238	1	1	9.62672e-05	0.011371	-0.175639	2.09591	2.5183e+09	0.492106	3.83937e+10	4.70391e+10
2007-12-26	6.04629	19	176530	554361127	124058	443011076	0.0176957	0.208921	0.102795	0.993241	1	1	9.62288e-05	0.0115804	-0.175867	2.09716	2.5214e+09	0.492083	3.84017e+10	4.70454e+10
2007-12-27	6.04765	19	176528	554567560	124056	443428955	0.0176784	0.208953	0.103657	0.99331	1	1	9.62364e-05	0.011689	-0.176339	2.09683	2.52211e+09	0.492038	3.84205e+10	4.70747e+10
2007-12-28	6.0421	19	177036	557089704	124647	447917448	0.0176283	0.210871	0.104187	0.993334	1	1	9.60001e-05	0.011701	-0.176418	2.0974	2.53294e+09	0.492735	3.84923e+10	4.71607e+10
2007-12-29	6.03921	19	176653	555348666	124411	447040862	0.0176316	0.211302	0.104219	0.993349	1	1	9.61518e-05	0.011706	-0.176603	2.09125	2.5235e+09	0.493136	3.84892e+10	4.71473e+10
2007-12-30	6.03558	19	176809	555996885	124698	449623292	0.0176434	0.212944	0.10632	0.993438	1	1	9.6123e-05	0.0117922	-0.176376	2.09061	2.52614e+09	0.493787	3.84898e+10	4.71539e+10
2007-12-31	6.06811	19	174121	540777427	122453	437342402	0.0178852	0.211845	0.105707	0.993417	1	1	9.73693e-05	0.0110845	-0.181319	2.09732	2.46954e+09	0.488932	3.7952e+10	4.6578e+10
2008-01-01	6.1623	19	154931	446166332	108438	358179506	0.0180253	0.205774	0.106609	0.993471	1	1	0.000106244	0.01018	-0.190183	2.1271	2.03084e+09	0.471938	3.4222e+10	4.28308e+10
2008-01-02	6.164	18	154801	446585932	108517	358492056	0.0181643	0.20596	0.109578	0.993502	1	1	0.000106181	0.0103473	-0.189919	2.16273	2.03001e+09	0.471673	3.45759e+10	4.31839e+10
2008-01-03	6.16476	18	155402	450061059	108924	361236138	0.0181542	0.205956	0.110201	0.993535	1	1	0.000105764	0.0103122	-0.190093	2.1628	2.04491e+09	0.471575	3.46682e+10	4.32798e+10
2008-01-04	6.16525	18	155867	452409521	109162	362769712	0.0181497	0.205712	0.110424	0.993537	1	1	0.000105517	0.0103019	-0.190567	2.15647	2.05593e+09	0.471636	3.47119e+10	4.33256e+10
2008-01-05	6.16491	18	155963	452907207	109242	363160962	0.0181149	0.205369	0.110493	0.993539	1	1	0.000105497	0.010404	-0.190451	2.15632	2.05844e+09	0.47186	3.47653e+10	4.33797e+10
2008-01-06	6.15434	18	146847	450640352	99032	361265260	0.0181993	0.205879	0.110982	0.993529	1	1	0.000105709	0.0104159	-0.190725	2.08	2.04662e+09	0.472753	3.47024e+10	4.33173e+10
2008-01-07	6.1539	18	147067	452173171	99199	362387627	0.0182152	0.205811	0.111222	0.993554	1	1	0.000105541	0.0104069	-0.190771	2.07647	2.05047e+09	0.472785	3.47978e+10	4.34139e+10
2008-01-08	6.15115	18	147461	454659652	99551	364742012	0.0182641	0.206178	0.110477	0.993555	1	1	0.000105316	0.010456	-0.190339	2.07475	2.06215e+09	0.473457	3.48589e+10	4.34822e+10
2008-01-09	6.14967	18	147572	455223448	99669	365503016	0.0182937	0.206496	0.110967	0.993561	1	1	0.000105234	0.01036	-0.190141	2.07537	2.06523e+09	0.473567	3.48919e+10	4.35332e+10
2008-01-10	6.14867	18	148251	462434957	99751	371141959	0.018264	0.206314	0.110947	0.99352	1	1	0.000104401	0.0102668	-0.189329	2.07254	2.10126e+09	0.473725	3.50428e+10	4.37057e+10
2008-01-11	6.14554	18	147989	460693884	99593	369909703	0.0189003	0.20658	0.111702	0.993526	1	1	0.000104575	0.0104606	-0.189209	2.0702	2.08997e+09	0.473947	3.50164e+10	4.36796e+10
2008-01-12	6.14593	18	147854	459820561	99493	369156122	0.019135	0.206502	0.11245	0.993643	1	1	0.000104714	0.0106605	-0.189114	2.07142	2.08638e+09	0.474083	3.50293e+10	4.36945e+10
2008-01-13	6.14325	18	147704	458793763	99404	368330846	0.0191733	0.206591	0.112956	0.99365	1	1	0.000104802	0.0106727	-0.189078	2.06876	2.08055e+09	0.474244	3.50184e+10	4.36833e+10
2008-01-14	6.14254	18	147890	459867347	99491	369045220	0.0192459	0.206491	0.113592	0.993673	1	1	0.000104645	0.0106429	-0.189214	2.06745	2.08324e+09	0.47412	3.50415e+10	4.37064e+10
2008-01-15	6.13775	17	148165	461614245	99723	370395880	0.0192757	0.207024	0.113944	0.993673	1	1	0.000104527	0.0107039	-0.189516	2.06544	2.09114e+09	0.475124	3.51094e+10	4.3777e+10
2008-01-16	6.13879	17	148167	461692326	99688	370417127	0.0192857	0.206882	0.11405	0.99368	1	1	0.0001045	0.0108239	-0.189661	2.06496	2.09269e+09	0.474908	3.50484e+10	4.37046e+10
2008-01-17	6.13885	17	148156	461696677	99686	370401299	0.0192625	0.206871	0.114252	0.99368	1	1	0.000104507	0.0108525	-0.189838	2.06545	2.09295e+09	0.474911	3.50678e+10	4.37127e+10
2008-01-18	6.1381	17	148342	462770156	99821	371343912	0.0192647	0.206951	0.11419	0.993688	1	1	0.000104418	0.010824	-0.189873	2.06496	2.09791e+09	0.475136	3.51851e+10	4.38311e+10
2008-01-19	6.13949	17	148150	461669829	99683	370527594	0.0191513	0.206992	0.113095	0.993653	1	1	0.000104524	0.0107808	-0.189843	2.0657	2.09337e+09	0.47491	3.51422e+10	4.37419e+10
2008-01-20	6.13708	17	148161	462542310	99836	371567824	0.0191579	0.207495	0.11308	0.993662	1	1	0.000104438	0.0108449	-0.189733	2.06633	2.0964e+09	0.475246	3.51916e+10	4.38046e+10
2008-01-21	6.12787	17	148248	463052689	99938	371842682	0.0189969	0.207532	0.11254	0.993568	1	1	0.000104339	0.0108216	-0.189819	2.06139	2.09829e+09	0.476149	3.52061e+10	4.38213e+10
2008-01-22	6.12466	17	148465	464241682	100078	372231276	0.0190792	0.207267	0.113797	0.993581	1	1	0.000104188	0.0108025	-0.189692	2.06172	2.10341e+09	0.476497	3.52836e+10	4.3907e+10
2008-01-23	6.12105	17	148691	465250627	100274	372729044	0.0190345	0.20707	0.11421	0.993567	1	1	0.000104039	0.0109185	-0.189597	2.06362	2.1081e+09	0.47687	3.53163e+10	4.39434e+10
2008-01-24	6.1386	17	148871	467114279	100287	375818927	0.0190124	0.207737	0.113655	0.993562	1	1	0.000103987	0.0109109	-0.189632	2.06948	2.16049e+09	0.475867	3.53214e+10	4.39296e+10
2008-01-25	6.1364	17	149025	468083447	100403	376658350	0.0190146	0.207958	0.113634	0.993575	1	1	0.000103951	0.0109168	-0.189813	2.06767	2.16615e+09	0.476508	3.54338e+10	4.40452e+10
2008-01-26	6.13277	17	148666	465687413	100171	374638126	0.0190799	0.207971	0.114366	0.99361	1	1	0.000104207	0.0109945	-0.189894	2.06618	2.15247e+09	0.476881	3.54137e+10	4.40174e+10
2008-01-27	6.13337	17	148669	465733386	100169	374717748	0.0191796	0.207992	0.114423	0.993658	1	1	0.000104187	0.0110053	-0.189837	2.0661	2.15272e+09	0.476719	3.54215e+10	4.40257e+10
2008-01-28	6.13081	17	149021	467732826	100614	378592412	0.0192995	0.209782	0.115437	0.993707	1	1	0.00010396	0.010914	-0.190015	2.06581	2.16222e+09	0.47706	3.54418e+10	4.40455e+10
2008-01-29	6.12707	17	149004	467447322	100616	378268464	0.0193052	0.209812	0.116321	0.993775	1	1	0.00010398	0.0109184	-0.190306	2.065	2.16003e+09	0.477462	3.54664e+10	4.40869e+10
2008-01-30	6.12361	17	149193	468545506	100753	379171283	0.0193787	0.209832	0.116953	0.993813	1	1	0.00010388	0.0109615	-0.190326	2.06231	2.16308e+09	0.47794	3.5565e+10	4.42699e+10
2008-01-31	6.12039	17	149280	465955516	100526	377339092	0.0193731	0.210145	0.116328	0.993802	1	1	0.000104094	0.0107461	-0.191026	2.01421	2.12811e+09	0.477907	3.55572e+10	4.4328e+10
2008-02-01	6.12903	17	148266	462688543	100000	375022142	0.0194291	0.209707	0.116471	0.993807	1	1	0.000104507	0.0109633	-0.190905	2.05844	2.13087e+09	0.477197	3.52181e+10	4.40018e+10
2008-02-02	6.13168	17	147742	459729841	99590	372504338	0.0194264	0.209533	0.117548	0.993794	1	1	0.000104898	0.0110871	-0.190608	2.05792	2.11924e+09	0.477167	3.51566e+10	4.39342e+10
2008-02-03	6.13254	17	147792	460094567	99621	372846884	0.0194775	0.209475	0.117409	0.993821	1	1	0.000104856	0.0110815	-0.190473	2.05788	2.12078e+09	0.477058	3.51432e+10	4.39211e+10
2008-02-04	6.13218	17	147864	460518737	99668	373194274	0.019499	0.209463	0.117371	0.99383	1	1	0.0001048	0.0110791	-0.190507	2.05763	2.12247e+09	0.477072	3.52525e+10	4.40437e+10
2008-02-05	6.13103	17	147799	460056596	99634	372824269	0.0195058	0.20955	0.117313	0.993836	1	1	0.000104839	0.0110821	-0.190285	2.05686	2.11965e+09	0.477129	3.52461e+10	4.40374e+10
2008-02-06	6.13265	17	147748	459802393	99597	372710672	0.0194238	0.209606	0.117446	0.993795	1	1	0.000104871	0.0110925	-0.190198	2.0575	2.12022e+09	0.476967	3.52308e+10	4.40264e+10
2008-02-07	6.13661	17	147673	459423499	99514	372220208	0.0194728	0.20931	0.117631	0.993821	1	1	0.000104912	0.011095	-0.190348	2.06108	2.11878e+09	0.476445	3.52245e+10	4.40079e+10
2008-02-08	6.13534	17	147593	458878145	99475	371837836	0.0194458	0.209357	0.117366	0.993812	1	1	0.000104988	0.0110941	-0.190225	2.06051	2.11522e+09	0.476643	3.52367e+10	4.40197e+10
2008-02-09	6.13524	17	147404	457670367	99354	370942614	0.0194559	0.20942	0.118703	0.993849	1	1	0.000105143	0.0111092	-0.190074	2.061	2.10999e+09	0.476742	3.52251e+10	4.40074e+10
2008-02-10	6.13374	17	147423	457708446	99367	370892985	0.0196745	0.209421	0.120419	0.993947	1	1	0.000105122	0.0110955	-0.190067	2.05982	2.1112e+09	0.476806	3.52359e+10	4.40175e+10
2008-02-11	6.1349	17	147190	456372266	99206	369896938	0.0198819	0.209426	0.123437	0.994053	1	1	0.000105309	0.0112081	-0.189998	2.05955	2.1058e+09	0.47685	3.52455e+10	4.40273e+10
2008-02-12	6.13389	17	147162	456147115	99194	369706386	0.0198749	0.209456	0.123772	0.994103	1	1	0.00010533	0.01121	-0.189942	2.05933	2.10428e+09	0.476944	3.524e+10	4.40218e+10
2008-02-13	6.13456	17	147105	455823304	99141	369464074	0.0199002	0.209455	0.123926	0.994108	1	1	0.000105376	0.0112139	-0.189891	2.0599	2.10319e+09	0.476915	3.523e+10	4.40118e+10
2008-02-14	6.14211	17	147379	457808266	99281	371026112	0.0199037	0.209202	0.123937	0.994109	1	1	0.000105155	0.011114	-0.189792	2.06459	2.11636e+09	0.47614	3.52628e+10	4.40668e+10
2008-02-15	6.14501	17	147593	458849930	99438	371983326	0.0199512	0.209237	0.12405	0.994106	1	1	0.000105047	0.0110967	-0.189517	2.07349	2.12254e+09	0.475878	3.5315e+10	4.4122e+10
2008-02-16	6.14519	17	147433	457887574	99316	371041980	0.0198933	0.209109	0.12426	0.994092	1	1	0.000105123	0.0111008	-0.189665	2.07261	2.11786e+09	0.475687	3.52917e+10	4.40873e+10
2008-02-17	6.14583	17	147389	457634840	99283	370824832	0.0197936	0.209074	0.125128	0.994089	1	1	0.000105178	0.0111319	-0.189674	2.07295	2.11684e+09	0.475766	3.53172e+10	4.41127e+10
2008-02-18	6.14107	17	147650	459080782	99477	371753384	0.0198447	0.208983	0.125052	0.994108	1	1	0.000105007	0.0111108	-0.189958	2.07256	2.12182e+09	0.476326	3.53467e+10	4.41557e+10
2008-02-19	6.14052	17	147807	460091606	99581	372537342	0.0198494	0.209007	0.124717	0.994112	1	1	0.000104887	0.0111083	-0.190021	2.0722	2.12686e+09	0.476411	3.53594e+10	4.41761e+10
2008-02-20	6.13835	17	148339	463316531	99944	374959049	0.0198701	0.209284	0.125052	0.994117	1	1	0.000104511	0.0109887	-0.18971	2.0718	2.14092e+09	0.476676	3.54369e+10	4.42652e+10
2008-02-21	6.13532	17	148251	462711325	99886	374267900	0.0199469	0.209225	0.125733	0.994156	1	1	0.000104523	0.0110494	-0.190174	2.06945	2.13761e+09	0.476774	3.54107e+10	4.42394e+10
2008-02-22	6.13373	17	148349	463043142	99995	374563980	0.0199561	0.209209	0.12593	0.994164	1	1	0.00010452	0.0111465	-0.190252	2.07318	2.14062e+09	0.477171	3.5412e+10	4.42466e+10
2008-02-23	6.13381	17	148311	462823268	99968	374344876	0.0199528	0.209159	0.126141	0.994178	1	1	0.000104551	0.0111439	-0.190271	2.07321	2.13976e+09	0.47718	3.54286e+10	4.42588e+10
2008-02-24	6.13414	17	148277	462622255	99942	374188016	0.0199899	0.209152	0.126127	0.994171	1	1	0.000104576	0.0111468	-0.190227	2.07343	2.13925e+09	0.477158	3.54235e+10	4.42499e+10
2008-02-25	6.13483	18	150931	464635371	100554	375779982	0.0200422	0.20909	0.126349	0.994193	1	1	0.000104431	0.0111165	-0.18969	2.03052	2.1803e+09	0.477635	3.54558e+10	4.42851e+10
2008-02-26	6.12089	18	150493	461622740	100326	373159264	0.0199226	0.209345	0.126197	0.99415	1	1	0.000104742	0.0111396	-0.189953	2.02341	2.16821e+09	0.479068	3.54611e+10	4.42882e+10
2008-02-27	6.11849	18	150671	462569450	100449	373741420	0.019862	0.209291	0.126817	0.994154	1	1	0.000104592	0.0110936	-0.190118	2.02261	2.17244e+09	0.479205	3.54883e+10	4.43138e+10
2008-02-28	6.11803	18	150950	464191858	100681	375580910	0.0198562	0.209714	0.126848	0.994153	1	1	0.000104416	0.011079	-0.190144	2.02269	2.17933e+09	0.479331	3.5562e+10	4.44915e+10
2008-02-29	6.11794	18	150421	460874913	100153	371768451	0.0198446	0.208605	0.126783	0.994145	1	1	0.000104768	0.0107467	-0.19032	2.0249	2.166e+09	0.479253	3.54599e+10	4.4386e+10
2008-03-01	6.10963	17	148263	466116967	100724	375570695	0.0198469	0.208331	0.127464	0.994151	1	1	0.000104301	0.0109134	-0.190735	2.05156	2.22977e+09	0.480905	3.5858e+10	4.48056e+10
2008-03-02	6.11354	17	147815	462571397	100332	372610766	0.0198585	0.208271	0.127021	0.994111	1	1	0.000104712	0.0108696	-0.190651	2.05057	2.21534e+09	0.480443	3.57894e+10	4.4733e+10
2008-03-03	6.11267	17	148152	465216320	100582	374519374	0.0199188	0.20809	0.127268	0.994114	1	1	0.000104437	0.0108422	-0.190733	2.05215	2.22746e+09	0.480681	3.58242e+10	4.47689e+10
2008-03-04	6.10932	17	148354	466319644	100722	375161280	0.0198559	0.207944	0.127482	0.994104	1	1	0.000104277	0.0108655	-0.190905	2.05067	2.23279e+09	0.480915	3.61616e+10	4.51107e+10
2008-03-05	6.09787	16	144441	466651808	92486	375648088	0.0198896	0.208374	0.128718	0.99412	1	1	0.000104197	0.0108823	-0.191101	1.98944	2.13953e+09	0.481971	3.59794e+10	4.49617e+10
2008-03-06	6.09366	16	144614	467612286	92600	376257670	0.0198849	0.208404	0.128663	0.994112	1	1	0.000104093	0.0110065	-0.191511	1.98568	2.14068e+09	0.482468	3.61169e+10	4.51054e+10
2008-03-07	6.09292	16	144735	468537353	92676	376913572	0.019864	0.208326	0.128566	0.994119	1	1	0.000104005	0.0109669	-0.191817	1.98507	2.14455e+09	0.482608	3.61367e+10	4.51285e+10
2008-03-08	6.09345	16	144625	467973736	92621	376494706	0.0198804	0.208321	0.128773	0.994142	1	1	0.000104061	0.010974	-0.191721	1.98451	2.14155e+09	0.482526	3.61246e+10	4.51184e+10
2008-03-09	6.09663	16	144754	468368689	92762	376822454	0.0199401	0.208179	0.129158	0.99417	1	1	0.000104002	0.0109665	-0.191736	1.99036	2.1459e+09	0.48208	3.61272e+10	4.51234e+10
2008-03-10	6.09291	16	145343	472625602	93173	380122484	0.0199459	0.208469	0.129103	0.994227	1	1	0.000103505	0.0109253	-0.191325	1.98498	2.16515e+09	0.482468	3.61955e+10	4.51706e+10
2008-03-11	6.09076	16	145345	473141941	93200	380323022	0.0199902	0.208471	0.132761	0.994232	1	1	0.000103465	0.0109101	-0.19132	1.98309	2.16768e+09	0.482716	3.62177e+10	4.5188e+10
2008-03-12	6.08943	16	145523	474253257	93308	381095292	0.0202543	0.208437	0.133321	0.994404	1	1	0.00010336	0.0108814	-0.191514	1.98224	2.17194e+09	0.482937	3.62418e+10	4.52179e+10
2008-03-13	6.08702	16	145643	474825581	93402	381635428	0.0203515	0.209594	0.134733	0.994496	1	1	0.000103278	0.0108918	-0.191417	1.98124	2.17395e+09	0.483125	3.62582e+10	4.52688e+10
2008-03-14	6.08606	16	145671	474978744	93434	381780344	0.0204135	0.209568	0.134942	0.994522	1	1	0.000103274	0.0108458	-0.191399	1.98095	2.17347e+09	0.483326	3.62759e+10	4.53336e+10
2008-03-15	6.0797	16	145754	475242713	93507	381903538	0.020329	0.209635	0.135953	0.994515	1	1	0.000103268	0.0109678	-0.190628	1.97897	2.17201e+09	0.484233	3.63006e+10	4.53601e+10
2008-03-16	6.08122	16	145511	473841857	93351	380910114	0.020328	0.20972	0.1362	0.994544	1	1	0.000103401	0.0108094	-0.190744	1.97975	2.16664e+09	0.483966	3.62124e+10	4.51625e+10
2008-03-17	6.08201	16	145740	475347287	93512	382108146	0.0203233	0.209624	0.136792	0.994541	1	1	0.000103272	0.0107587	-0.190647	1.98016	2.17297e+09	0.48405	3.65374e+10	4.60785e+10
2008-03-18	6.07789	16	146027	477155430	93625	383360907	0.0203363	0.209571	0.136657	0.99454	1	1	0.000103078	0.0107047	-0.191157	1.97763	2.1804e+09	0.48456	3.65627e+10	4.61067e+10
2008-03-19	6.07636	16	146164	478177604	93729	384031780	0.0203697	0.20946	0.136833	0.994553	1	1	0.000102953	0.010747	-0.191582	1.97834	2.18459e+09	0.484706	3.65255e+10	4.6069e+10
2008-03-20	6.0725	16	146591	480849918	94027	386024181	0.0203495	0.209526	0.136923	0.99456	1	1	0.000102739	0.0106901	-0.19117	1.97602	2.19273e+09	0.485628	3.65907e+10	4.61347e+10
2008-03-21	6.07537	16	146984	481229719	94031	386025186	0.0203388	0.209255	0.137214	0.994559	1	1	0.000102694	0.0106327	-0.191523	1.97443	2.19579e+09	0.485241	3.65685e+10	4.61244e+10
2008-03-22	6.08738	16	146872	480956524	93892	385859544	0.0203496	0.208959	0.137314	0.99457	1	1	0.000102829	0.0106383	-0.191786	1.98245	2.2091e+09	0.484434	3.65482e+10	4.61061e+10
2008-03-23	6.09027	16	146922	481414080	93913	386310260	0.02047	0.209036	0.137916	0.9946	1	1	0.000102779	0.0106171	-0.191861	1.9836	2.21172e+09	0.484086	3.65531e+10	4.6112e+10
2008-03-24	6.08871	16	146997	481826846	93925	386538060	0.0201737	0.208976	0.136139	0.994498	1	1	0.000102754	0.0106064	-0.19207	1.98309	2.21295e+09	0.484355	3.65641e+10	4.61266e+10
2008-03-25	6.08273	16	147216	483038754	94114	387587205	0.0201116	0.209312	0.133616	0.994435	1	1	0.00010266	0.0106149	-0.191893	1.9813	2.21769e+09	0.485314	3.65736e+10	4.61394e+10
2008-03-26	6.07674	16	147386	483788950	94198	387558184	0.0200872	0.209057	0.13371	0.994429	1	1	0.000102569	0.0105436	-0.19222	1.97898	2.22126e+09	0.485999	3.65827e+10	4.61577e+10
2008-03-27	6.07609	16	147520	484581399	94287	388195428	0.0201211	0.209051	0.133562	0.994453	1	1	0.000102497	0.0105354	-0.192454	1.98041	2.22552e+09	0.486171	3.66035e+10	4.61817e+10
2008-03-28	6.07428	16	147778	486433069	94464	389715626	0.0200787	0.209034	0.133311	0.994441	1	1	0.000102314	0.0105984	-0.192214	1.97968	2.23312e+09	0.486475	3.66537e+10	4.62386e+10
2008-03-29	6.07419	16	147633	485427698	94375	388923392	0.0200181	0.209026	0.133593	0.994427	1	1	0.000102436	0.0105812	-0.192266	1.98007	2.22963e+09	0.486569	3.66377e+10	4.62222e+10
2008-03-30	6.07339	16	147667	485594066	94407	389130690	0.0200204	0.209211	0.133675	0.994436	1	1	0.000102382	0.0106226	-0.19237	1.98021	2.22968e+09	0.486487	3.66474e+10	4.62231e+10
2008-03-31	6.07585	16	147683	485560122	94305	387898654	0.0200768	0.20847	0.133837	0.994461	1	1	0.000102355	0.0106931	-0.193214	1.9831	2.23453e+09	0.486066	3.7037e+10	4.66244e+10
2008-04-01	6.07144	16	147473	485131142	94171	388705000	0.0200851	0.209478	0.134343	0.994474	1	1	0.000102453	0.0106918	-0.193882	1.98732	2.24376e+09	0.486833	3.70589e+10	4.6562e+10
2008-04-02	6.06008	16	146812	484300014	94200	387957610	0.020104	0.2099	0.133819	0.994472	1	1	0.000102449	0.0106373	-0.193642	2.00801	2.23561e+09	0.487626	3.70687e+10	4.6576e+10
2008-04-03	6.0648	18	158478	485981103	110678	389627526	0.0199924	0.209946	0.1323	0.994439	1	1	0.000102318	0.0107121	-0.19352	2.12221	2.27534e+09	0.487366	3.71162e+10	4.66362e+10
2008-04-04	6.06308	18	158629	486764748	110780	390047256	0.0200195	0.209838	0.132271	0.994433	1	1	0.000102211	0.010704	-0.19379	2.12139	2.27767e+09	0.487458	3.7122e+10	4.6642e+10
2008-04-05	6.06537	18	158585	486641381	110724	389845354	0.0200313	0.209718	0.132137	0.994436	1	1	0.000102226	0.0107102	-0.193854	2.12111	2.27748e+09	0.487191	3.71393e+10	4.66755e+10
2008-04-06	6.0656	18	159319	486275849	111610	389521852	0.0200289	0.2097	0.13222	0.994437	1	1	0.000102257	0.0107276	-0.193767	2.13474	2.27587e+09	0.487165	3.71307e+10	4.66664e+10
2008-04-07	6.06501	18	159630	488304322	111814	390965144	0.0200254	0.209593	0.132277	0.994438	1	1	0.000102058	0.0107084	-0.194016	2.13186	2.28537e+09	0.487314	3.71481e+10	4.66841e+10
2008-04-08	6.05811	18	160042	490365639	112107	392093590	0.0200349	0.209375	0.132336	0.994438	1	1	0.000101791	0.0106883	-0.193706	2.13025	2.29388e+09	0.488011	3.71848e+10	4.67275e+10
2008-04-09	6.07388	18	161684	492183611	113338	389702212	0.020029	0.205771	0.132353	0.994448	1	1	0.000101753	0.0108354	-0.193694	2.15319	2.30111e+09	0.486957	3.7216e+10	4.6761e+10
2008-04-10	6.06807	18	162123	493490883	113525	390591972	0.0200313	0.205739	0.132338	0.994451	1	1	0.000101669	0.0108063	-0.193753	2.14479	2.30355e+09	0.487979	3.72442e+10	4.68044e+10
2008-04-11	6.06499	18	161936	492467787	113409	389408454	0.0200029	0.205532	0.131967	0.994427	1	1	0.000101743	0.0105218	-0.19387	2.1493	2.29935e+09	0.488176	3.7215e+10	4.67452e+10
2008-04-12	6.06549	18	161931	492430437	113381	389151110	0.020145	0.205349	0.132588	0.994477	1	1	0.000101722	0.0105228	-0.193936	2.14891	2.30015e+09	0.488011	3.72235e+10	4.67529e+10
2008-04-13	6.06508	18	161839	491856666	113317	388712884	0.020064	0.205344	0.132538	0.99447	1	1	0.000101778	0.0105289	-0.193938	2.14863	2.29729e+09	0.488037	3.72235e+10	4.6753e+10
2008-04-14	6.06049	18	161923	492256262	113386	388866452	0.0200711	0.205376	0.132685	0.994492	1	1	0.000101699	0.0105976	-0.19415	2.14519	2.29222e+09	0.488339	3.72296e+10	4.67606e+10
2008-04-15	6.05391	18	162664	496284666	114186	395075227	0.0200878	0.207643	0.132861	0.994511	1	1	0.000101294	0.0106697	-0.193685	2.14431	2.31404e+09	0.489389	3.73224e+10	4.68551e+10
2008-04-16	6.05948	18	163050	498838884	114470	397589288	0.0200879	0.207799	0.133103	0.99453	1	1	0.000101044	0.0108816	-0.193424	2.14689	2.32917e+09	0.48879	3.73661e+10	4.68996e+10
2008-04-17	6.05795	18	163115	499023748	114544	397682104	0.020101	0.207767	0.133303	0.994539	1	1	0.000101024	0.0108691	-0.193126	2.14759	2.33028e+09	0.488982	3.73785e+10	4.69111e+10
2008-04-18	6.06954	18	168496	503178031	118123	401549126	0.0200597	0.207776	0.133296	0.994519	1	1	0.000100689	0.0108268	-0.192866	2.08494	2.30552e+09	0.488161	3.74217e+10	4.69563e+10
2008-04-19	6.07461	19	169411	503207423	119039	401752646	0.0200927	0.207841	0.133238	0.994539	1	1	0.000100707	0.0108335	-0.192765	2.06614	2.30587e+09	0.487675	3.74175e+10	4.6951e+10
2008-04-20	6.07204	19	169490	503541676	119102	401950658	0.0200926	0.207896	0.133399	0.994536	1	1	0.000100652	0.0106812	-0.192569	2.06448	2.30636e+09	0.487881	3.74985e+10	4.70302e+10
2008-04-21	6.06493	19	169398	503108410	118961	401054559	0.0200855	0.207755	0.13375	0.994562	1	1	0.000100681	0.0107085	-0.193123	2.05926	2.29923e+09	0.488578	3.75315e+10	4.70624e+10
2008-04-22	6.06576	19	170392	506385045	119346	403446102	0.0201339	0.207763	0.134476	0.9946	1	1	0.000100325	0.0106791	-0.19296	2.02312	2.31389e+09	0.488317	3.75898e+10	4.71276e+10
2008-04-23	6.06529	19	170619	507678866	119470	404352274	0.0200896	0.207626	0.135791	0.994609	1	1	0.000100222	0.0108579	-0.193143	2.02373	2.32056e+09	0.488505	3.76014e+10	4.71671e+10
2008-04-24	6.06799	19	170915	509555662	119655	405701564	0.0200955	0.207453	0.135947	0.994608	1	1	0.000100047	0.0108968	-0.192799	2.02422	2.32848e+09	0.488226	3.76251e+10	4.71906e+10
2008-04-25	6.07305	19	171404	511239903	120441	404679470	0.0200896	0.20539	0.135765	0.994611	1	1	9.99308e-05	0.0108493	-0.192971	2.04854	2.33967e+09	0.488011	3.76537e+10	4.72276e+10
2008-04-26	6.07402	19	171244	510298031	120333	403998004	0.0201608	0.205411	0.137261	0.994648	1	1	0.000100018	0.0108793	-0.192866	2.04902	2.33509e+09	0.48786	3.76463e+10	4.72106e+10
2008-04-27	6.07642	19	171139	509791175	120240	403541926	0.0204002	0.205257	0.137888	0.994735	1	1	0.000100074	0.0108908	-0.19275	2.05106	2.33435e+09	0.487625	3.7634e+10	4.71983e+10
2008-04-28	6.07261	19	171484	511676209	120536	405409218	0.0203372	0.205626	0.137952	0.994725	1	1	9.98325e-05	0.0109068	-0.192711	2.04762	2.34097e+09	0.487805	3.76742e+10	4.72481e+10
2008-04-29	6.0744	19	171572	512299909	120578	405903450	0.0203433	0.205574	0.137948	0.994723	1	1	9.97462e-05	0.0109017	-0.192863	2.04729	2.34375e+09	0.48747	3.76689e+10	4.72202e+10
2008-04-30	6.0844	19	172325	517181714	121065	410043069	0.0204234	0.205536	0.13844	0.994754	1	1	9.93203e-05	0.0109304	-0.19251	2.05504	2.37065e+09	0.486626	3.78762e+10	4.7496e+10
2008-05-01	6.07012	19	172128	515176432	121133	407970563	0.0204149	0.205898	0.138387	0.994756	1	1	9.93138e-05	0.0108179	-0.193757	2.04632	2.35086e+09	0.487341	3.84956e+10	4.83698e+10
2008-05-02	6.07	19	171591	512007773	120757	405284531	0.0203809	0.205383	0.138465	0.994746	1	1	9.96538e-05	0.010879	-0.193676	2.04591	2.33456e+09	0.48753	3.84176e+10	4.82617e+10
2008-05-03	6.07035	19	171629	512273690	120780	405504564	0.0202557	0.205391	0.137438	0.994684	1	1	9.96255e-05	0.0108759	-0.193691	2.04552	2.33569e+09	0.487465	3.84174e+10	4.82615e+10
2008-05-04	6.06781	19	171753	512848409	120874	405943486	0.0202581	0.205351	0.137359	0.994682	1	1	9.95788e-05	0.0108404	-0.193402	2.0452	2.33818e+09	0.487891	3.84304e+10	4.82788e+10
2008-05-05	6.06524	19	172160	515078249	121169	407530989	0.0202763	0.205336	0.138015	0.994691	1	1	9.94e-05	0.0109795	-0.192886	2.04407	2.35091e+09	0.48846	3.84615e+10	4.83138e+10
2008-05-06	6.06219	19	172198	516084450	121310	408087426	0.0202873	0.205302	0.138206	0.994706	1	1	9.92915e-05	0.0109426	-0.193031	2.04347	2.35508e+09	0.488827	3.84724e+10	4.83277e+10
2008-05-07	6.06263	19	172337	516913003	121397	408626381	0.020291	0.205195	0.138437	0.994719	1	1	9.92275e-05	0.0109456	-0.193065	2.04371	2.35902e+09	0.488879	3.84981e+10	4.83602e+10
2008-05-08	6.04916	19	172496	517188018	121578	408667740	0.0203482	0.205456	0.139577	0.994774	1	1	9.91533e-05	0.0109893	-0.192645	2.03966	2.34718e+09	0.490269	3.85589e+10	4.8441e+10
2008-05-09	6.05048	19	172720	518567403	121719	409757525	0.0204006	0.205473	0.139759	0.994808	1	1	9.89986e-05	0.0109807	-0.19258	2.03979	2.35379e+09	0.490015	3.85792e+10	4.84952e+10
2008-05-10	6.03721	18	166166	517587873	115919	408606186	0.0203629	0.205864	0.14006	0.994818	1	1	9.90617e-05	0.0110694	-0.192217	2.14442	2.41301e+09	0.49138	3.86197e+10	4.85328e+10
2008-05-11	6.04613	18	165876	516217087	115633	407208782	0.0203689	0.205417	0.139095	0.994805	1	1	9.91787e-05	0.0109773	-0.1925	2.14878	2.4105e+09	0.490141	3.85743e+10	4.84819e+10
2008-05-12	6.052	18	166393	519649076	116068	410100892	0.0203408	0.205259	0.139143	0.994798	1	1	9.89164e-05	0.0109411	-0.192381	2.16077	2.42542e+09	0.489948	3.86142e+10	4.85359e+10
2008-05-13	6.0505	18	166494	520313461	116135	410542977	0.0204371	0.20523	0.139824	0.994806	1	1	9.88761e-05	0.0109079	-0.192541	2.15948	2.42784e+09	0.490256	3.86167e+10	4.85473e+10
2008-05-14	6.04926	18	166632	521317883	116184	410645093	0.0204824	0.204752	0.14119	0.99483	1	1	9.87697e-05	0.0109259	-0.192573	2.15985	2.42271e+09	0.490318	3.86702e+10	4.86761e+10
2008-05-15	6.04527	18	167024	523516879	116494	412502465	0.0204872	0.204858	0.140748	0.994827	1	1	9.86364e-05	0.0109875	-0.192654	2.15885	2.43153e+09	0.491161	3.87385e+10	4.87482e+10
2008-05-16	6.04443	18	166908	523682324	116501	412530748	0.0205995	0.204711	0.141858	0.994875	1	1	9.86145e-05	0.0109836	-0.192783	2.18868	2.36791e+09	0.491326	3.8724e+10	4.87334e+10
2008-05-17	6.04324	18	166769	523022869	116444	412062536	0.0205934	0.20475	0.142515	0.9949	1	1	9.86733e-05	0.0109811	-0.192621	2.19296	2.36294e+09	0.491434	3.87022e+10	4.87112e+10
2008-05-18	6.03696	18	166537	521209131	116357	411045776	0.0206094	0.205255	0.142686	0.994893	1	1	9.88384e-05	0.0110045	-0.192641	2.19233	2.35509e+09	0.492201	3.8709e+10	4.8718e+10
2008-05-19	6.04401	18	166949	523407917	116506	413047879	0.0206563	0.20525	0.143907	0.994906	1	1	9.87057e-05	0.0111203	-0.192373	2.16348	2.43089e+09	0.491736	3.87111e+10	4.87213e+10
2008-05-20	6.04435	18	167362	526065608	116763	415072120	0.0206675	0.205117	0.143833	0.994903	1	1	9.8517e-05	0.0112576	-0.191595	2.16437	2.44359e+09	0.492091	3.87749e+10	4.87816e+10
2008-05-21	6.04622	19	173221	525191302	123241	411525896	0.0206421	0.205013	0.143678	0.994886	1	1	9.86078e-05	0.0112666	-0.191936	2.21269	2.43953e+09	0.491982	3.87944e+10	4.88032e+10
2008-05-22	6.04377	19	173295	525456766	123302	411607772	0.0206446	0.205095	0.143637	0.994885	1	1	9.85641e-05	0.0111577	-0.192065	2.21124	2.44067e+09	0.492101	3.88244e+10	4.88846e+10
2008-05-23	6.04442	19	173489	526629773	123439	412522609	0.0206136	0.205232	0.142774	0.994885	1	1	9.84814e-05	0.0111457	-0.192254	2.21124	2.44607e+09	0.492173	3.88456e+10	4.89059e+10
2008-05-24	6.04369	19	173438	526247417	123404	412163197	0.0205809	0.20521	0.142996	0.994863	1	1	9.85067e-05	0.011229	-0.192185	2.21164	2.44443e+09	0.492205	3.88476e+10	4.89081e+10
2008-05-25	5.9918	19	172808	521491291	124855	422508344	0.0205994	0.214944	0.144067	0.994864	1	1	9.8563e-05	0.0112333	-0.191624	2.2224	2.42352e+09	0.496596	3.88645e+10	4.89256e+10
2008-05-26	5.99121	19	173087	523022713	125076	423864236	0.0205554	0.215082	0.144166	0.994854	1	1	9.84194e-05	0.0111275	-0.191913	2.22451	2.43193e+09	0.496739	3.88857e+10	4.89563e+10
2008-05-27	5.98783	19	173244	523677312	125233	424621640	0.0205653	0.215384	0.144515	0.994867	1	1	9.83438e-05	0.0111337	-0.191514	2.22343	2.43155e+09	0.497089	3.89141e+10	4.89978e+10
2008-05-28	5.98813	19	173559	525606261	125462	426223272	0.0206001	0.215405	0.144124	0.994832	1	1	9.81474e-05	0.0111566	-0.191392	2.2222	2.44006e+09	0.496983	3.89458e+10	4.90657e+10
2008-05-29	5.99113	19	173687	526901360	125527	427484071	0.0204327	0.215545	0.143753	0.994802	1	1	9.80574e-05	0.0113002	-0.191036	2.21779	2.44797e+09	0.496855	3.90119e+10	4.91749e+10
2008-05-30	5.98854	19	174041	528900275	125799	429109668	0.0204228	0.215725	0.143937	0.994799	1	1	9.79164e-05	0.0112898	-0.1908	2.21726	2.45625e+09	0.497418	3.91878e+10	4.94126e+10
2008-05-31	5.9892	19	173043	523084758	125123	425195205	0.0204117	0.216742	0.144303	0.994803	1	1	9.84091e-05	0.0114302	-0.190538	2.21611	2.42735e+09	0.496989	3.89602e+10	4.91258e+10
2008-06-01	5.97817	19	175284	524097752	127745	425318308	0.0203896	0.216915	0.143362	0.994781	1	1	9.82717e-05	0.0114655	-0.191332	2.23821	2.40607e+09	0.498111	3.89592e+10	4.90987e+10
2008-06-02	5.97054	19	174906	521454351	127490	422833147	0.0203871	0.216819	0.143016	0.994777	1	1	9.85293e-05	0.0113916	-0.191802	2.23451	2.38777e+09	0.49896	3.89475e+10	4.90893e+10
2008-06-03	5.96296	19	174860	521107603	127566	422560157	0.0203178	0.217032	0.143253	0.994766	1	1	9.85327e-05	0.0114857	-0.192055	2.23879	2.38224e+09	0.499724	3.89404e+10	4.90814e+10
2008-06-04	5.95999	19	174826	522110087	127497	423312215	0.0202781	0.217072	0.143136	0.994746	1	1	9.84373e-05	0.0114816	-0.192212	2.2362	2.38783e+09	0.500194	3.89739e+10	4.91209e+10
2008-06-05	5.9607	19	175006	523198271	127610	423991042	0.0202708	0.217065	0.14348	0.99475	1	1	9.83638e-05	0.0115204	-0.192115	2.23739	2.39457e+09	0.500332	3.90219e+10	4.9188e+10
2008-06-06	5.96258	19	175282	525102340	127655	423620288	0.020256	0.21529	0.143414	0.994754	1	1	9.82253e-05	0.0116197	-0.192518	2.23767	2.40253e+09	0.50027	3.91171e+10	4.93114e+10
2008-06-07	5.9621	19	174993	523242013	127447	422058656	0.0203573	0.215215	0.143725	0.994761	1	1	9.83958e-05	0.0116487	-0.19274	2.23877	2.39474e+09	0.500305	3.90249e+10	4.91382e+10
2008-06-08	5.96202	19	174891	522682058	127360	421467286	0.0203361	0.215073	0.143468	0.994759	1	1	9.84143e-05	0.0116524	-0.192591	2.23786	2.39197e+09	0.500161	3.90095e+10	4.91143e+10
2008-06-09	5.9615	19	174877	522557775	127357	421411486	0.0203386	0.215236	0.143544	0.994775	1	1	9.84177e-05	0.0116438	-0.192501	2.23708	2.39117e+09	0.500169	3.89937e+10	4.90984e+10
2008-06-10	5.95522	19	175323	524770785	127707	422914370	0.0203325	0.215342	0.144819	0.994796	1	1	9.82172e-05	0.0116108	-0.192298	2.23839	2.40704e+09	0.501078	3.90104e+10	4.91152e+10
2008-06-11	5.95403	19	175061	523243727	127522	421730720	0.0203995	0.215202	0.144489	0.994817	1	1	9.8376e-05	0.0115677	-0.192652	2.23686	2.39647e+09	0.501257	3.9037e+10	4.9161e+10
2008-06-12	5.96304	19	175415	525776217	127650	422757714	0.0203496	0.214034	0.146529	0.994798	1	1	9.82091e-05	0.0115575	-0.192967	2.24574	2.4218e+09	0.500715	3.90485e+10	4.91701e+10
2008-06-13	5.95661	19	175533	525922014	127846	423659709	0.0204379	0.214828	0.145787	0.994794	1	1	9.81497e-05	0.0114634	-0.192943	2.24607	2.41861e+09	0.501228	3.91725e+10	4.92961e+10
2008-06-14	5.95648	19	175326	524644543	127720	422856578	0.0203969	0.215	0.145089	0.994761	1	1	9.82616e-05	0.0114825	-0.192887	2.24713	2.41381e+09	0.501224	3.91495e+10	4.92712e+10
2008-06-15	5.95423	19	175434	525157633	127818	423325174	0.0203833	0.215099	0.145006	0.994753	1	1	9.82419e-05	0.0114694	-0.192407	2.246	2.41507e+09	0.501721	3.91714e+10	4.92948e+10
2008-06-16	5.95427	19	175741	526902882	127887	422610788	0.0203958	0.213514	0.145487	0.994766	1	1	9.81263e-05	0.0114766	-0.192634	2.24688	2.4229e+09	0.501928	3.94589e+10	49623793465
2008-06-17	5.95239	19	175883	527766132	128047	423960222	0.0204119	0.214132	0.145511	0.994774	1	1	9.80645e-05	0.0114744	-0.192477	2.24661	2.43419e+09	0.502316	3.94997e+10	4.96645e+10
2008-06-18	5.95068	19	176230	530391374	128243	425815036	0.0204394	0.214037	0.145432	0.994777	1	1	9.78371e-05	0.0114506	-0.192348	2.23849	2.44129e+09	0.502654	3.95613e+10	4.97505e+10
2008-06-19	5.94946	19	176089	529489130	128138	424966420	0.0204345	0.213986	0.145633	0.994781	1	1	9.79164e-05	0.0113828	-0.192276	2.23776	2.43644e+09	0.502765	3.95307e+10	4.97225e+10
2008-06-20	5.94658	19	176372	531137947	128332	425934000	0.0204207	0.213761	0.145566	0.994784	1	1	9.78226e-05	0.0114685	-0.192	2.23531	2.44572e+09	0.503513	3.95768e+10	4.97739e+10
2008-06-21	5.94604	19	175805	527678454	127940	423313788	0.0204233	0.213967	0.146053	0.994815	1	1	9.81565e-05	0.0114875	-0.192093	2.2357	2.43016e+09	0.503649	3.95294e+10	4.97246e+10
2008-06-22	5.94694	19	175724	527282663	127884	423139771	0.0204146	0.214128	0.145739	0.994826	1	1	9.81829e-05	0.0114634	-0.192053	2.23564	2.42935e+09	0.503451	3.95313e+10	4.97261e+10
2008-06-23	5.94296	19	175914	528038861	128026	423348469	0.0204794	0.213987	0.145469	0.994842	1	1	9.80781e-05	0.0115506	-0.191693	2.23551	2.43223e+09	0.503768	3.95456e+10	4.97695e+10
2008-06-24	5.94242	19	175977	528307434	128080	423575748	0.0204858	0.213979	0.145826	0.994834	1	1	9.80474e-05	0.0114958	-0.191642	2.23671	2.43313e+09	0.503788	3.95657e+10	4.98447e+10
2008-06-25	5.93973	19	176096	529019163	128217	424683135	0.020561	0.214403	0.146031	0.994856	1	1	9.80227e-05	0.0115635	-0.191455	2.23447	2.43468e+09	0.504416	3.95931e+10	4.98734e+10
2008-06-26	5.945	19	176480	531712185	128468	426961620	0.0205648	0.214319	0.146055	0.994857	1	1	9.77972e-05	0.0114626	-0.191443	2.23453	2.44882e+09	0.503911	3.96315e+10	4.99117e+10
2008-06-27	5.94568	19	176518	531932722	128494	427146998	0.0205534	0.214269	0.145474	0.994803	1	1	9.77847e-05	0.0115454	-0.191441	2.23507	2.44989e+09	0.503867	3.96501e+10	4.9972e+10
2008-06-28	5.94334	19	176423	531325601	128438	426692254	0.0206097	0.214339	0.145296	0.994828	1	1	9.78243e-05	0.0115463	-0.191316	2.23185	2.44302e+09	0.50404	3.9659e+10	4.99834e+10
2008-06-29	5.94377	19	176226	530172596	128287	425714051	0.0204372	0.21426	0.145269	0.994748	1	1	9.7932e-05	0.0115335	-0.191384	2.23234	2.43882e+09	0.504008	3.96396e+10	4.99638e+10
2008-06-30	5.939	19	176638	532208684	128607	427081628	0.020446	0.214118	0.144993	0.994758	1	1	9.78026e-05	0.0116149	-0.191267	2.23207	2.44653e+09	0.504991	3.99992e+10	5.03397e+10
2008-07-01	5.97362	21	178987	524569709	128727	422882156	0.0204071	0.215127	0.141376	0.994739	1	1	9.84616e-05	0.0116677	-0.192326	2.08576	2.43779e+09	0.500218	4.25336e+10	5.33828e+10
2008-07-02	5.98179	21	178582	522673966	128376	421628332	0.0204448	0.214749	0.141912	0.994751	1	1	9.87078e-05	0.0117042	-0.192313	2.0883	2.43879e+09	0.49956	4.2479e+10	5.33234e+10
2008-07-03	5.98639	21	178695	523788604	128464	423075805	0.0204271	0.214826	0.141726	0.994747	1	1	9.86478e-05	0.0117462	-0.192819	2.08766	2.45049e+09	0.499139	4.26646e+10	5.3538e+10
2008-07-04	5.9837	21	178729	523790757	128486	422766474	0.0203139	0.214639	0.141196	0.994701	1	1	9.86659e-05	0.0117812	-0.19301	2.08772	2.4502e+09	0.499662	4.26749e+10	5.35482e+10
2008-07-05	5.98301	21	178371	521832564	128265	421660784	0.0203289	0.214951	0.141078	0.994712	1	1	9.88758e-05	0.0117951	-0.192964	2.08643	2.4407e+09	0.499862	4.26385e+10	5.35129e+10
2008-07-06	5.98464	21	178252	521263547	128175	421316159	0.0201574	0.215001	0.139618	0.994673	1	1	9.8936e-05	0.011798	-0.192845	2.08674	2.43811e+09	0.499694	4.26271e+10	5.35011e+10
2008-07-07	5.9875	21	178508	522856568	128341	423490640	0.0200438	0.215497	0.139565	0.994632	1	1	9.8842e-05	0.0118903	-0.193152	2.08887	2.4459e+09	0.499629	4.26508e+10	5.35492e+10
2008-07-08	5.98463	21	178724	524188748	128551	424750120	0.0200612	0.215742	0.139685	0.994629	1	1	9.86976e-05	0.0118948	-0.192985	2.08542	2.45134e+09	0.49994	4.2678e+10	5.35766e+10
2008-07-09	5.98244	21	178667	523680332	128522	424292248	0.0200527	0.215708	0.139004	0.994583	1	1	9.87573e-05	0.0119662	-0.192954	2.08528	2.44899e+09	0.500294	4.26995e+10	5.36047e+10
2008-07-10	5.97522	21	178995	525344107	128802	425790111	0.0201134	0.215773	0.139357	0.994607	1	1	9.8576e-05	0.0119652	-0.192957	2.08266	2.45793e+09	0.501112	4.2784e+10	5.36949e+10
2008-07-11	5.97879	21	178970	525261356	128709	425276960	0.020101	0.214665	0.139475	0.994616	1	1	9.85821e-05	0.0119695	-0.192981	2.08477	2.45743e+09	0.500657	4.27816e+10	5.36866e+10
2008-07-12	5.9779	21	178944	525025043	128693	425017954	0.0201203	0.214574	0.139465	0.994691	1	1	9.86005e-05	0.0119088	-0.192933	2.08501	2.45708e+09	0.500762	4.2775e+10	5.36802e+10
2008-07-13	5.9778	21	178845	524461338	128618	424551825	0.0203784	0.214556	0.141544	0.994756	1	1	9.86477e-05	0.0119161	-0.192934	2.08498	2.45453e+09	0.500748	4.2771e+10	5.36743e+10
2008-07-14	5.97298	21	179029	525146726	128841	425806440	0.0203072	0.215466	0.142428	0.994787	1	1	9.85703e-05	0.0119071	-0.192645	2.08468	2.45793e+09	0.501316	4.28744e+10	5.38035e+10
2008-07-15	5.96776	21	179525	527778579	129367	429433058	0.0202708	0.216699	0.1424	0.994768	1	1	9.82814e-05	0.0118696	-0.192738	2.0772	2.46963e+09	0.501734	4.29512e+10	5.38791e+10
2008-07-16	5.96773	21	179278	526427614	129176	428235436	0.0203145	0.21645	0.143953	0.994826	1	1	9.84708e-05	0.011875	-0.193326	2.07734	2.46594e+09	0.502027	4.2842e+10	5.37203e+10
2008-07-17	5.96651	21	179321	526637615	129197	428188315	0.0202318	0.216368	0.142121	0.994801	1	1	9.84738e-05	0.0118959	-0.193474	2.07626	2.46586e+09	0.502283	4.28425e+10	5.37208e+10
2008-07-18	5.96734	21	179175	525917646	129070	427550752	0.0201518	0.216104	0.141844	0.994786	1	1	9.85768e-05	0.0119827	-0.193495	2.0757	2.4642e+09	0.502353	4.28497e+10	5.37256e+10
2008-07-19	5.96747	21	178807	523792483	128815	426014216	0.0200082	0.216305	0.138621	0.994649	1	1	9.88138e-05	0.0120127	-0.193419	2.07604	2.45483e+09	0.502519	4.28318e+10	5.36794e+10
2008-07-20	5.96891	21	178879	524393278	128826	426138980	0.0199565	0.215922	0.138449	0.994631	1	1	9.88041e-05	0.012001	-0.193387	2.07598	2.45669e+09	0.502577	4.22727e+10	5.27538e+10
2008-07-21	5.96673	21	178788	523727867	128761	425474234	0.019948	0.215956	0.138854	0.994625	1	1	9.88537e-05	0.0120094	-0.193431	2.07519	2.45218e+09	0.502742	4.22731e+10	5.2745e+10
2008-07-22	5.96639	21	178799	523776644	128758	425352583	0.0198567	0.215847	0.138741	0.994592	1	1	9.88559e-05	0.0120026	-0.193827	2.07553	2.4523e+09	0.502838	4.23339e+10	5.28091e+10
2008-07-23	5.96668	21	178933	524514081	128844	425781642	0.0198628	0.215711	0.139074	0.994583	1	1	9.88013e-05	0.0119938	-0.193866	2.07632	2.45622e+09	0.502872	4.23462e+10	5.28223e+10
2008-07-24	5.96421	21	178926	524375866	128829	425458210	0.0198629	0.215658	0.139105	0.994609	1	1	9.88092e-05	0.0119884	-0.193894	2.07421	2.45211e+09	0.503164	4.22873e+10	5.27397e+10
2008-07-25	5.95798	21	178915	524065385	128828	424789090	0.0198568	0.215487	0.139281	0.994614	1	1	9.88497e-05	0.011994	-0.193501	2.07243	2.4508e+09	0.504132	4.22824e+10	5.27342e+10
2008-07-26	5.96036	21	178621	522536528	128622	423506818	0.0198863	0.215342	0.139524	0.994622	1	1	9.90359e-05	0.0120156	-0.19333	2.07363	2.44344e+09	0.504075	4.22831e+10	5.27311e+10
2008-07-27	5.96093	21	178509	521876835	128546	423020106	0.0198392	0.215301	0.139088	0.994592	1	1	9.91193e-05	0.0120274	-0.193321	2.0754	2.44164e+09	0.504123	4.22578e+10	5.26818e+10
2008-07-28	5.95985	21	178823	523755933	128765	424452156	0.0198532	0.215234	0.13894	0.994613	1	1	9.89449e-05	0.0119889	-0.193493	2.07374	2.44984e+09	0.504272	4.22702e+10	5.26944e+10
2008-07-29	5.9602	21	178964	524339144	128895	425196758	0.0198136	0.215459	0.137523	0.99461	1	1	9.88917e-05	0.011984	-0.193538	2.07684	2.45242e+09	0.504278	4.22887e+10	5.27225e+10
2008-07-30	5.95899	21	179251	525973067	129119	426473896	0.0197531	0.215424	0.136466	0.994565	1	1	9.87684e-05	0.0118947	-0.19339	2.07675	2.46095e+09	0.504639	4.23213e+10	5.27557e+10
2008-07-31	5.9588	21	179064	524848890	129019	426172059	0.0197555	0.215956	0.136038	0.994542	1	1	9.88406e-05	0.0120151	-0.19375	2.07667	2.45835e+09	0.504469	4.23056e+10	5.27363e+10
2008-08-01	5.96288	21	179651	528061295	129210	427245722	0.0199967	0.214842	0.140107	0.994455	1	1	9.86002e-05	0.0119501	-0.193025	2.08191	2.48973e+09	0.504572	4.23407e+10	5.2696e+10
2008-08-02	5.95359	21	178664	522022300	128504	422047376	0.0200468	0.214632	0.141231	0.994484	1	1	9.90894e-05	0.0121064	-0.192861	2.07401	2.44937e+09	0.505227	4.22177e+10	5.25226e+10
2008-08-03	5.95368	21	178580	521557234	128449	421769688	0.0198581	0.214674	0.140276	0.994358	1	1	9.91336e-05	0.0121121	-0.192834	2.07406	2.44704e+09	0.505218	4.22087e+10	5.25136e+10
2008-08-04	5.95091	21	178536	521157182	128425	421169344	0.0198556	0.214547	0.140381	0.994374	1	1	9.92035e-05	0.0121617	-0.193197	2.07262	2.44915e+09	0.50574	4.22405e+10	5.25684e+10
2008-08-05	5.94957	21	178817	522694591	128641	422489742	0.0197509	0.214656	0.137454	0.994333	1	1	9.90658e-05	0.0122171	-0.193033	2.07196	2.45613e+09	0.505983	4.22695e+10	5.25997e+10
2008-08-06	5.94269	21	178433	522956887	128957	431983349	0.0197834	0.222656	0.138276	0.994341	1	1	9.90153e-05	0.0122081	-0.191809	2.06813	2.45909e+09	0.507016	4.23288e+10	5.26667e+10
2008-08-07	5.94328	21	178492	523402652	128877	430825240	0.019834	0.221468	0.139384	0.994366	1	1	9.89804e-05	0.0122311	-0.191692	2.06865	2.46035e+09	0.506956	4.25201e+10	5.28631e+10
2008-08-08	5.94326	21	178518	523558973	128906	431084880	0.0198515	0.221482	0.139106	0.994375	1	1	9.89676e-05	0.0122534	-0.191604	2.069	2.46143e+09	0.506972	4.2527e+10	5.28715e+10
2008-08-09	5.94559	21	178247	522108094	128635	429489036	0.0198715	0.221048	0.139287	0.99436	1	1	9.91107e-05	0.0122713	-0.191578	2.0689	2.45335e+09	0.506637	4.24856e+10	5.28268e+10
2008-08-10	5.94499	21	178040	521031534	128509	428455268	0.0198867	0.221108	0.139885	0.994383	1	1	9.92198e-05	0.0122684	-0.189934	2.0687	2.44608e+09	0.506795	4.25167e+10	5.28639e+10
2008-08-11	5.94362	21	178062	521068966	128513	428172602	0.0199071	0.220988	0.139209	0.994377	1	1	9.92127e-05	0.0121292	-0.190225	2.06816	2.44618e+09	0.506968	4.24346e+10	5.2799e+10
2008-08-12	5.95987	21	179167	528350449	129304	435136650	0.0199446	0.221199	0.142585	0.99444	1	1	9.85755e-05	0.0120578	-0.189784	2.07668	2.4985e+09	0.50528	4.25067e+10	5.28775e+10
2008-08-13	5.95741	21	179228	528608099	129375	435425170	0.020068	0.221283	0.14265	0.994473	1	1	9.85318e-05	0.0119734	-0.189843	2.07475	2.49756e+09	0.505463	4.25346e+10	5.2929e+10
2008-08-14	5.95453	21	179092	527718071	129294	434670892	0.0200146	0.221226	0.142036	0.994456	1	1	9.86333e-05	0.0121055	-0.19	2.07238	2.49066e+09	0.505934	4.25679e+10	5.29537e+10
2008-08-15	5.95522	21	179317	528969475	129485	435834533	0.0200019	0.221248	0.142025	0.994458	1	1	9.8524e-05	0.0121173	-0.189707	2.07362	2.49734e+09	0.505902	4.26533e+10	5.30426e+10
2008-08-16	5.95757	21	179096	527828640	129325	435118400	0.0200389	0.221367	0.142167	0.994505	1	1	9.86404e-05	0.0121705	-0.189529	2.07421	2.49109e+09	0.505595	4.25455e+10	5.29173e+10
2008-08-17	5.9592	21	178943	527100848	129186	434335193	0.0201117	0.221183	0.142578	0.99453	1	1	9.87188e-05	0.0121802	-0.189283	2.07389	2.48705e+09	0.505459	4.25295e+10	5.28958e+10
2008-08-18	5.95853	21	179302	529342661	129417	436107672	0.0201271	0.221179	0.142325	0.994541	1	1	9.85712e-05	0.012198	-0.189368	2.07139	2.49822e+09	0.505911	4.25466e+10	5.29575e+10
2008-08-19	5.95685	21	179326	529431585	129447	436052074	0.0200992	0.221145	0.141831	0.994519	1	1	9.85381e-05	0.0121637	-0.189745	2.06908	2.49794e+09	0.505979	4.25436e+10	5.2953e+10
2008-08-20	5.95665	22	190414	532117773	143173	438740148	0.0201186	0.221498	0.141725	0.994541	1	1	9.83564e-05	0.0121339	-0.189485	2.21052	2.5136e+09	0.506368	4.2629e+10	5.3042e+10
2008-08-21	5.95547	22	190172	530659600	142980	437340200	0.0201122	0.221341	0.141146	0.994526	1	1	9.85173e-05	0.0121442	-0.189835	2.21128	2.50784e+09	0.506658	4.26324e+10	5.30394e+10
2008-08-22	5.95342	22	190184	530556617	142995	437127547	0.0200955	0.221361	0.141588	0.994569	1	1	9.85586e-05	0.0122321	-0.189731	2.21119	2.49977e+09	0.507085	4.26461e+10	5.30521e+10
2008-08-23	5.95372	22	190070	529947659	142911	436683817	0.0200929	0.221398	0.141613	0.994569	1	1	9.86151e-05	0.0122395	-0.189571	2.21079	2.49683e+09	0.507052	4.26348e+10	5.30387e+10
2008-08-24	5.9544	22	189976	529451616	142838	436445432	0.0200613	0.221501	0.142437	0.994582	1	1	9.86512e-05	0.0122479	-0.189525	2.20895	2.49605e+09	0.506908	4.26317e+10	5.30354e+10
2008-08-25	5.95336	22	190188	530630252	142998	437361600	0.0201498	0.221386	0.143624	0.994611	1	1	9.85719e-05	0.012313	-0.189399	2.20671	2.50132e+09	0.507194	4.26894e+10	5.30965e+10
2008-08-26	5.95233	22	190204	530618461	143012	437264585	0.0201848	0.221378	0.143833	0.994624	1	1	9.8574e-05	0.0123827	-0.189305	2.20614	2.50179e+09	0.507383	4.2709e+10	5.31125e+10
2008-08-27	5.95456	22	190688	533284216	143363	439367424	0.0200783	0.221285	0.14281	0.994581	1	1	9.83133e-05	0.0123492	-0.189457	2.20833	2.51468e+09	0.507011	4.2724e+10	5.31346e+10
2008-08-28	5.95155	22	190777	533572935	143411	439067797	0.0199972	0.221032	0.142254	0.994538	1	1	9.82886e-05	0.0123696	-0.189521	2.20702	2.51572e+09	0.507368	4.27807e+10	5.31928e+10
2008-08-29	5.94646	22	190447	531206797	143184	436837994	0.0199497	0.221171	0.141812	0.994508	1	1	9.85411e-05	0.0124031	-0.189721	2.20935	2.50563e+09	0.508212	4.27705e+10	5.31808e+10
2008-08-30	5.94442	22	190287	530230703	143075	436035013	0.0199446	0.22124	0.141779	0.994511	1	1	9.86383e-05	0.0124593	-0.189842	2.20826	2.49933e+09	0.508536	4.27941e+10	5.32008e+10
2008-08-31	5.94487	22	189711	527178291	142601	433111836	0.019951	0.2209	0.141705	0.994514	1	1	9.8918e-05	0.0124669	-0.189831	2.20785	2.48311e+09	0.508452	4.27708e+10	5.31733e+10
2008-09-01	5.92358	22	189836	526553285	142782	431835508	0.0199806	0.221003	0.142827	0.994532	1	1	9.90238e-05	0.0125182	-0.189116	2.20616	2.4707e+09	0.511459	4.29821e+10	5.3359e+10
2008-09-02	5.92244	22	189124	522668868	142241	428575044	0.0201108	0.22096	0.142973	0.994591	1	1	9.94404e-05	0.0126279	-0.189193	2.20531	2.45128e+09	0.511828	4.29105e+10	5.32757e+10
2008-09-03	5.91906	20	189038	523235879	142339	428945781	0.0202006	0.221056	0.143638	0.994603	1	1	9.93608e-05	0.0126882	-0.189044	2.21951	2.34077e+09	0.512063	4.29187e+10	5.32896e+10
2008-09-04	5.91933	20	188986	522945031	142315	428922053	0.0202495	0.221202	0.143165	0.994625	1	1	9.94149e-05	0.0126799	-0.188918	2.22008	2.34061e+09	0.512203	4.29243e+10	5.32944e+10
2008-09-05	5.91674	20	189104	523423684	142473	429993722	0.0202997	0.221861	0.143166	0.994653	1	1	9.93652e-05	0.0126731	-0.18819	2.21928	2.34221e+09	0.512555	4.29415e+10	5.33152e+10
2008-09-06	5.9179	20	188908	522425202	142303	428991468	0.0203063	0.221706	0.142779	0.994671	1	1	9.94841e-05	0.0126855	-0.18811	2.22011	2.33964e+09	0.512559	4.29195e+10	5.32928e+10
2008-09-07	5.92183	20	188992	522851044	142381	429717071	0.0203326	0.221828	0.142925	0.994671	1	1	9.94465e-05	0.0127489	-0.188072	2.22803	2.34223e+09	0.512054	4.29144e+10	5.32862e+10
2008-09-08	5.88647	20	188939	520668293	142595	428346700	0.019978	0.2235	0.143823	0.994741	1	1	9.93971e-05	0.0126729	-0.187823	2.20035	2.28425e+09	0.514711	4.32051e+10	5.36096e+10
2008-09-09	5.89249	20	189096	522769458	142646	430215284	0.0198872	0.223383	0.142555	0.994684	1	1	9.92116e-05	0.0126594	-0.187775	2.19887	2.30141e+09	0.514111	4.32101e+10	5.36189e+10
2008-09-10	5.88965	20	189539	525188294	143002	432320543	0.019886	0.223408	0.142488	0.994685	1	1	9.89313e-05	0.0126226	-0.187641	2.1961	2.31057e+09	0.514164	4.32593e+10	5.36826e+10
2008-09-11	5.88805	20	189252	523473804	142805	431017293	0.0198189	0.223521	0.141357	0.994679	1	1	9.90877e-05	0.0125819	-0.187471	2.19577	2.30172e+09	0.514351	4.31988e+10	5.36129e+10
2008-09-12	5.88899	20	189348	523950095	142865	431258690	0.0197839	0.22337	0.139685	0.994578	1	1	9.90697e-05	0.0126019	-0.187471	2.19804	2.30493e+09	0.514385	4.3216e+10	5.36526e+10
2008-09-13	5.8887	20	189231	523296431	142781	430761118	0.0195639	0.22343	0.138827	0.994473	1	1	9.91098e-05	0.0125949	-0.187254	2.19794	2.30149e+09	0.5143	4.31919e+10	5.36248e+10
2008-09-14	5.88757	20	189122	522646503	142704	430211006	0.0196416	0.223449	0.139382	0.994532	1	1	9.91802e-05	0.0125251	-0.18726	2.1974	2.29791e+09	0.514486	4.31856e+10	5.36023e+10
2008-09-15	5.88729	20	189245	523249602	142799	430674600	0.019594	0.223397	0.139379	0.994523	1	1	9.91512e-05	0.0125517	-0.187054	2.19848	2.30277e+09	0.514752	4.31964e+10	5.36281e+10
2008-09-16	5.88566	20	189493	524439193	143006	431721236	0.0196154	0.223508	0.139232	0.994543	1	1	9.90111e-05	0.0125709	-0.187181	2.19892	2.30603e+09	0.514803	4.32849e+10	5.37167e+10
2008-09-17	5.88296	20	189512	524355634	143031	431541772	0.0196557	0.223462	0.13962	0.994565	1	1	9.90319e-05	0.0126698	-0.187164	2.19887	2.30398e+09	0.515156	4.37607e+10	5.49804e+10
2008-09-18	5.88051	20	189555	524451427	143079	431615246	0.0195941	0.223524	0.13956	0.994558	1	1	9.90735e-05	0.0127107	-0.187196	2.19892	2.30437e+09	0.51573	4.37979e+10	5.50177e+10
2008-09-19	5.87749	20	189384	523554039	142945	430697438	0.0195802	0.223453	0.139174	0.994558	1	1	9.91811e-05	0.0127187	-0.187194	2.1954	2.30034e+09	0.516264	4.38065e+10	5.50368e+10
2008-09-20	5.87383	20	189572	524247777	143095	430976856	0.0195852	0.223403	0.139001	0.994549	1	1	9.91002e-05	0.0128904	-0.18719	2.19508	2.29943e+09	0.516689	4.37925e+10	5.50217e+10
2008-09-21	5.86782	20	189077	521284387	142731	428229064	0.0195941	0.223227	0.138394	0.994566	1	1	9.93759e-05	0.0129678	-0.187084	2.19148	2.28176e+09	0.517405	4.37735e+10	5.49977e+10
2008-09-22	5.86636	20	190165	527271690	143555	433069172	0.0195941	0.223239	0.138635	0.99459	1	1	9.86903e-05	0.0129052	-0.188859	2.18671	2.30519e+09	0.516912	4.37718e+10	5.49936e+10
2008-09-23	5.86801	20	189981	528994430	143304	434674528	0.0195992	0.223405	0.138015	0.994599	1	1	9.85352e-05	0.0128707	-0.188812	2.20078	2.31185e+09	0.516753	4.38019e+10	5.50258e+10
2008-09-24	5.86677	20	189976	528961899	143299	434563047	0.0196789	0.223331	0.138272	0.994637	1	1	9.8576e-05	0.0129032	-0.189199	2.20049	2.31302e+09	0.517178	4.38072e+10	5.50338e+10
2008-09-25	5.8597	20	190165	529977907	143421	434719114	0.0196815	0.223171	0.138225	0.994641	1	1	9.84785e-05	0.0131331	-0.189276	2.18661	2.30734e+09	0.518061	4.38672e+10	5.50899e+10
2008-09-26	5.86086	20	190173	530082478	143423	434847556	0.0196562	0.223181	0.137993	0.994642	1	1	9.84674e-05	0.0129922	-0.189116	2.18688	2.30822e+09	0.517899	4.38833e+10	5.50999e+10
2008-09-27	5.864	20	190328	531076430	143536	435865213	0.0197672	0.223203	0.137956	0.994709	1	1	9.83578e-05	0.012956	-0.189245	2.18953	2.31664e+09	0.517409	4.38737e+10	5.50854e+10
2008-09-28	5.86313	20	190436	531629676	143631	436424370	0.0197564	0.22324	0.138337	0.994715	1	1	9.83072e-05	0.0130662	-0.189319	2.18969	2.31951e+09	0.517535	4.38778e+10	5.50856e+10
2008-09-29	5.86398	20	190358	531311669	143572	436276864	0.0197679	0.223313	0.139227	0.994706	1	1	9.83471e-05	0.0130769	-0.189446	2.18957	2.31981e+09	0.517441	4.38844e+10	5.50926e+10
2008-09-30	5.86327	20	190495	532037249	143672	436764290	0.0197352	0.223219	0.13909	0.994682	1	1	9.83169e-05	0.0131732	-0.189315	2.18965	2.31938e+09	0.517703	4.3926e+10	5.51413e+10
2008-10-01	5.85678	20	190084	529004658	143483	435126494	0.0197139	0.224094	0.139275	0.994686	1	1	9.84333e-05	0.0132069	-0.189199	2.18744	2.42008e+09	0.517705	4.38534e+10	5.50602e+10
2008-10-02	5.86026	20	189711	527195018	143184	433751084	0.0197557	0.22416	0.136146	0.994706	1	1	9.86298e-05	0.0132196	-0.18898	2.1886	2.41239e+09	0.517329	4.37564e+10	5.49411e+10
2008-10-03	5.86293	21	190016	527513473	143195	434046596	0.0197114	0.224093	0.138808	0.994702	1	1	9.86374e-05	0.0132312	-0.188786	2.16293	2.45284e+09	0.517258	4.37588e+10	5.49436e+10
2008-10-04	5.86441	21	189999	527489044	143178	434090318	0.0196479	0.224096	0.138319	0.994667	1	1	9.86446e-05	0.0132332	-0.18858	2.16432	2.45469e+09	0.517134	4.37581e+10	5.49427e+10
2008-10-05	5.86465	21	190016	527589607	143183	434164670	0.0196798	0.224066	0.138564	0.994667	1	1	9.86354e-05	0.0132314	-0.188609	2.16429	2.45511e+09	0.517105	4.38723e+10	5.50567e+10
2008-10-06	5.86357	21	190389	529539610	143451	435449780	0.0196977	0.22385	0.139401	0.994666	1	1	9.85088e-05	0.0132956	-0.188914	2.16562	2.46479e+09	0.517615	4.38872e+10	5.50719e+10
2008-10-07	5.86538	21	190801	531912360	143738	437360700	0.0197336	0.223801	0.139217	0.994673	1	1	9.82926e-05	0.0132665	-0.188784	2.1675	2.47507e+09	0.517421	4.39217e+10	5.5107e+10
2008-10-08	5.86674	21	191591	535042026	144437	440542380	0.0197426	0.224557	0.139275	0.994676	1	1	9.80747e-05	0.0133696	-0.188719	2.17156	2.48858e+09	0.517573	4.40556e+10	5.52909e+10
2008-10-09	5.85362	21	191226	532423349	144177	437573770	0.0197374	0.224797	0.139187	0.994677	1	1	9.82377e-05	0.01341	-0.189147	2.16183	2.45977e+09	0.518681	4.4089e+10	5.53327e+10
2008-10-10	5.84945	21	191693	534888691	144605	440329850	0.019722	0.225503	0.13905	0.994682	1	1	9.80161e-05	0.013275	-0.189126	2.16123	2.47076e+09	0.519309	4.41368e+10	5.53891e+10
2008-10-11	5.85013	21	191422	533290482	144401	438988530	0.0197702	0.225545	0.139096	0.994706	1	1	9.81457e-05	0.013292	-0.188569	2.16325	2.46357e+09	0.5191	4.41139e+10	5.53421e+10
2008-10-12	5.85071	21	191309	532711379	144308	438472048	0.0196276	0.225502	0.139577	0.994648	1	1	9.82236e-05	0.0133045	-0.188524	2.16415	2.46174e+09	0.519197	4.41037e+10	5.53318e+10
2008-10-13	5.85466	21	191601	534573822	144491	439841206	0.0196797	0.225476	0.139622	0.994674	1	1	9.80791e-05	0.0132851	-0.188527	2.1666	2.47211e+09	0.518814	4.41348e+10	5.5365e+10
2008-10-14	5.85341	21	191637	534696819	144518	439825846	0.019639	0.225379	0.140153	0.994674	1	1	9.80793e-05	0.0133585	-0.188677	2.16661	2.47249e+09	0.519056	4.41173e+10	5.53479e+10
2008-10-15	5.84741	21	191936	536047413	144810	441355046	0.0196865	0.22581	0.140628	0.994684	1	1	9.80155e-05	0.0133509	-0.188115	2.16458	2.47754e+09	0.520148	4.41738e+10	5.54096e+10
2008-10-16	5.85259	21	191993	536680727	144770	441336730	0.0196814	0.225096	0.14095	0.994682	1	1	9.80193e-05	0.0132749	-0.18787	2.16381	2.47982e+09	0.519655	4.41509e+10	5.5389e+10
2008-10-17	5.85663	21	191832	535861489	144459	438369074	0.0196621	0.22295	0.140852	0.994681	1	1	9.8122e-05	0.0132644	-0.188179	2.16801	2.47781e+09	0.51917	4.41228e+10	5.53566e+10
2008-10-18	5.85518	21	191875	535887647	144600	439626634	0.019693	0.223867	0.14133	0.994678	1	1	9.81094e-05	0.0132633	-0.187831	2.16951	2.48123e+09	0.519369	4.41299e+10	5.53634e+10
2008-10-19	5.85452	21	191739	535114513	144498	438974099	0.0197266	0.223893	0.14148	0.994704	1	1	9.81362e-05	0.013174	-0.18787	2.16885	2.47709e+09	0.519211	4.41238e+10	5.53559e+10
2008-10-20	5.85231	21	192139	537130238	144835	441359588	0.0197395	0.224461	0.141386	0.994693	1	1	9.79271e-05	0.0131351	-0.187572	2.16772	2.48584e+09	0.519363	4.41943e+10	5.54239e+10
2008-10-21	5.85073	21	191984	537144212	144622	440508154	0.0195596	0.223931	0.140452	0.994625	1	1	9.78764e-05	0.0130658	-0.187369	2.17381	2.48575e+09	0.5194	4.42379e+10	5.5469e+10
2008-10-22	5.85207	21	192366	539330552	144908	442212075	0.0195026	0.223734	0.141889	0.994597	1	1	9.76755e-05	0.0130742	-0.186972	2.17616	2.49562e+09	0.519259	4.4356e+10	5.55944e+10
2008-10-23	5.85471	21	192445	539891721	144950	442630827	0.0194681	0.223642	0.140756	0.994561	1	1	9.76559e-05	0.0130911	-0.186806	2.17653	2.49882e+09	0.519083	4.43909e+10	5.56442e+10
2008-10-24	5.85167	21	192462	539770456	144987	442566127	0.0193735	0.223749	0.140477	0.994548	1	1	9.76597e-05	0.0130946	-0.186654	2.17536	2.49707e+09	0.519432	4.44323e+10	5.56792e+10
2008-10-25	5.85095	21	192492	539227303	145041	442087039	0.0194458	0.223741	0.140933	0.994581	1	1	9.7746e-05	0.0131098	-0.186697	2.18497	2.51232e+09	0.519767	4.44803e+10	5.5718e+10
2008-10-26	5.85272	21	192413	538913738	144962	441741135	0.0196071	0.223586	0.142122	0.994604	1	1	9.77238e-05	0.0131119	-0.18698	2.18501	2.51018e+09	0.519267	4.44723e+10	5.57084e+10
2008-10-27	5.84932	21	192401	539077414	144917	441339220	0.0196059	0.223221	0.141751	0.9946	1	1	9.76972e-05	0.0131056	-0.186772	2.1837	2.50825e+09	0.519618	4.44973e+10	5.57311e+10
2008-10-28	5.84653	21	192633	540169924	145146	442686090	0.0196435	0.223723	0.141613	0.994591	1	1	9.75991e-05	0.0130831	-0.186604	2.18192	2.51402e+09	0.520027	4.45404e+10	5.57901e+10
2008-10-29	5.84442	21	192708	540213535	145227	442714173	0.0195928	0.223691	0.143402	0.994563	1	1	9.75452e-05	0.0130692	-0.186712	2.1819	2.51297e+09	0.520034	4.45728e+10	5.58336e+10
2008-10-30	5.84021	21	192916	541175019	145382	443118282	0.019585	0.223424	0.143318	0.994576	1	1	9.74744e-05	0.0130996	-0.18696	2.17776	2.51413e+09	0.520672	4.46634e+10	5.59472e+10
2008-10-31	5.83767	21	191974	536023880	144647	438532416	0.0195384	0.223337	0.144016	0.994579	1	1	9.79273e-05	0.0131855	-0.187159	2.1739	2.48962e+09	0.520978	4.45193e+10	5.57841e+10
2008-11-01	5.82572	21	191381	531537286	144167	433136393	0.0194759	0.222417	0.143559	0.99456	1	1	9.82722e-05	0.0134562	-0.186433	2.17913	2.44514e+09	0.522255	4.45517e+10	5.57321e+10
2008-11-02	5.82611	21	190720	528037619	143626	429851134	0.0194656	0.222194	0.143981	0.994562	1	1	9.85772e-05	0.0134911	-0.186839	2.17864	2.42955e+09	0.522056	4.44761e+10	5.56546e+10
2008-11-03	5.82389	21	190797	528385365	143692	430072868	0.0194012	0.222198	0.145616	0.99464	1	1	9.85409e-05	0.0134651	-0.187093	2.17682	2.43101e+09	0.522301	4.45063e+10	5.56955e+10
2008-11-04	5.82092	21	190987	529606696	143820	430822212	0.0194219	0.2222	0.14619	0.99465	1	1	9.83954e-05	0.0133803	-0.187098	2.1707	2.42624e+09	0.522538	4.46085e+10	5.58023e+10
2008-11-05	5.81999	21	191172	530621227	143958	431564438	0.0193941	0.222115	0.146312	0.994633	1	1	9.83121e-05	0.013351	-0.186767	2.16945	2.42294e+09	0.522759	4.46324e+10	5.58366e+10
2008-11-06	5.81733	21	191169	530379497	143971	431297042	0.0193927	0.222124	0.146307	0.994632	1	1	9.83669e-05	0.0132642	-0.186435	2.16996	2.42179e+09	0.523339	4.46385e+10	5.58509e+10
2008-11-07	5.81395	21	191147	529992603	143954	430637382	0.0193566	0.22196	0.146274	0.99464	1	1	9.83815e-05	0.0132681	-0.186371	2.16925	2.41905e+09	0.523756	4.46425e+10	5.58561e+10
2008-11-08	5.81217	21	190956	528810152	143817	429606844	0.019317	0.221884	0.146211	0.99462	1	1	9.84778e-05	0.013276	-0.186296	2.1685	2.41247e+09	0.52389	4.46126e+10	5.58239e+10
2008-11-09	5.81299	21	190728	527631415	143646	428762252	0.019339	0.221945	0.146837	0.994616	1	1	9.86237e-05	0.0132929	-0.186128	2.16888	2.40756e+09	0.523967	4.45827e+10	5.57844e+10
2008-11-10	5.81026	21	190986	528793625	143886	429952902	0.0192863	0.222308	0.146781	0.994593	1	1	9.8542e-05	0.0131537	-0.186152	2.16824	2.4117e+09	0.524466	4.49123e+10	5.64312e+10
2008-11-11	5.80839	21	191083	528936514	143980	430012116	0.0193208	0.222295	0.146121	0.994605	1	1	9.85275e-05	0.0132951	-0.18613	2.16477	2.41277e+09	0.524705	4.49227e+10	5.64518e+10
2008-11-12	5.80722	21	191216	529535434	144094	430561673	0.0194131	0.222382	0.144738	0.994452	1	1	9.8473e-05	0.0133065	-0.186133	2.1648	2.41065e+09	0.524924	4.50016e+10	5.72426e+10
2008-11-13	5.81476	21	191247	530223307	143664	425725119	0.0195604	0.216911	0.144641	0.994461	1	1	9.84456e-05	0.0132336	-0.186831	2.16766	2.41846e+09	0.523995	4.50352e+10	5.72759e+10
2008-11-14	5.8191	21	191671	532742559	143976	427979066	0.0196657	0.216933	0.144133	0.994455	1	1	9.82224e-05	0.013299	-0.185692	2.17005	2.4295e+09	0.523495	4.5071e+10	5.73053e+10
2008-11-15	5.81948	21	191836	533565047	144106	428719588	0.0200117	0.216954	0.137057	0.994448	1	1	9.81319e-05	0.0133342	-0.185255	2.17127	2.43564e+09	0.523417	4.49866e+10	5.73803e+10
2008-11-16	5.82014	20	191157	531264297	143729	425991786	0.0201635	0.216429	0.137218	0.994449	1	1	9.83272e-05	0.0132034	-0.185715	2.19747	2.3853e+09	0.523173	4.55105e+10	5.81408e+10
2008-11-17	5.85988	20	193703	546914414	145526	439944974	0.0202442	0.216148	0.137334	0.994444	1	1	9.70336e-05	0.0130429	-0.189506	2.23365	2.48727e+09	0.518726	4.55337e+10	5.81597e+10
2008-11-18	5.85864	20	194175	549523464	145886	442001838	0.0202538	0.216211	0.137458	0.994446	1	1	9.67817e-05	0.0129521	-0.189615	2.23261	2.49783e+09	0.518755	4.55726e+10	5.82008e+10
2008-11-19	5.85347	20	194209	549117989	145918	441115522	0.0202688	0.21601	0.137965	0.994459	1	1	9.67729e-05	0.0129641	-0.18965	2.2337	2.49602e+09	0.519188	4.55749e+10	5.81963e+10
2008-11-20	5.84991	20	194550	550789756	146204	442504991	0.020243	0.216087	0.138439	0.994464	1	1	9.66224e-05	0.0131044	-0.189979	2.23215	2.50217e+09	0.519646	4.57419e+10	5.83942e+10
2008-11-21	5.84529	20	194292	549151947	146040	441238330	0.020302	0.216262	0.138833	0.994462	1	1	9.67329e-05	0.0131663	-0.190348	2.22835	2.48935e+09	0.520013	4.57056e+10	5.83561e+10
2008-11-22	5.84599	20	194284	549137183	146032	441256735	0.0203541	0.216241	0.138665	0.994463	1	1	9.67416e-05	0.0131663	-0.190359	2.22844	2.49048e+09	0.51996	4.57158e+10	5.83624e+10
2008-11-23	5.84776	20	194174	548582890	145944	440880902	0.0204801	0.216207	0.138258	0.994462	1	1	9.67622e-05	0.0132225	-0.190266	2.23005	2.49002e+09	0.519577	4.56755e+10	5.83192e+10
2008-11-24	5.84893	20	194300	549413953	146053	441906224	0.0205471	0.216383	0.138374	0.994463	1	1	9.66937e-05	0.0132143	-0.190412	2.2295	2.49378e+09	0.51951	4.56897e+10	5.83266e+10
2008-11-25	5.84325	20	194145	550403072	145952	444428824	0.0205251	0.217415	0.138401	0.994456	1	1	9.66439e-05	0.0132501	-0.190009	2.2257	2.49833e+09	0.52059	4.5715e+10	5.83423e+10
2008-11-26	5.84337	20	194318	551778504	146029	445267308	0.0205839	0.217368	0.138594	0.994464	1	1	9.65585e-05	0.0133056	-0.190225	2.22403	2.5527e+09	0.520866	4.57511e+10	5.83734e+10
2008-11-27	5.83849	20	194238	550916369	146105	445925666	0.0205797	0.21907	0.138673	0.994468	1	1	9.66129e-05	0.0132605	-0.190158	2.22356	2.54801e+09	0.521425	4.57501e+10	5.83723e+10
2008-11-28	5.83501	20	194330	551470692	146200	445986666	0.0206343	0.218886	0.147529	0.994533	1	1	9.65641e-05	0.0133053	-0.190078	2.23026	2.53535e+09	0.521859	4.57928e+10	5.84118e+10
2008-11-29	5.83391	20	194045	549763655	145989	444544178	0.0207404	0.218869	0.147837	0.994541	1	1	9.67077e-05	0.0133306	-0.190434	2.23024	2.5285e+09	0.521967	4.57772e+10	5.83953e+10
2008-11-30	5.83118	20	194230	550627467	146151	445287801	0.0207209	0.218989	0.147478	0.994522	1	1	9.66538e-05	0.0133222	-0.19043	2.22907	2.53106e+09	0.522504	4.58104e+10	5.84289e+10
2008-12-01	5.80928	20	194320	551998096	146293	446403992	0.0208155	0.219426	0.147422	0.994528	1	1	9.62727e-05	0.0134661	-0.188127	2.22493	2.53762e+09	0.524133	4.58548e+10	5.84013e+10
2008-12-02	5.83099	20	194757	555508854	146550	450082188	0.0210915	0.219365	0.147629	0.994545	1	1	9.60061e-05	0.0135661	-0.188131	2.24512	2.57522e+09	0.521585	4.55874e+10	5.81214e+10
2008-12-03	5.83099	20	194762	555588729	146548	450097423	0.021117	0.219183	0.147424	0.994523	1	1	9.60184e-05	0.0134764	-0.188501	2.24516	2.57381e+09	0.52171	4.55808e+10	5.81191e+10
2008-12-04	5.83014	20	194687	555105560	146494	449660320	0.0211029	0.219181	0.147567	0.994527	1	1	9.6067e-05	0.0135849	-0.188706	2.24519	2.57224e+09	0.521891	4.55805e+10	5.81189e+10
2008-12-05	5.82898	20	194953	556444361	146692	450536710	0.0210275	0.219002	0.148365	0.994552	1	1	9.59897e-05	0.0136222	-0.189159	2.24563	2.57947e+09	0.522309	4.56029e+10	5.81524e+10
2008-12-06	5.83198	20	194934	556569095	146634	450343222	0.0210585	0.218468	0.148072	0.994516	1	1	9.59599e-05	0.0135181	-0.188996	2.24589	2.58021e+09	0.52179	4.56265e+10	5.81695e+10
2008-12-07	5.8322	20	194739	555462741	146489	449492236	0.0210853	0.218481	0.148606	0.994519	1	1	9.60602e-05	0.0134958	-0.188935	2.24609	2.57563e+09	0.521795	4.56089e+10	5.81516e+10
2008-12-08	5.83324	20	194957	557253599	146616	450906437	0.0209638	0.218423	0.147129	0.99449	1	1	9.5936e-05	0.0134669	-0.189406	2.24194	2.58514e+09	0.521853	4.572e+10	5.82711e+10
2008-12-09	5.8295	20	195011	557219304	146671	450659646	0.0209567	0.218313	0.147035	0.99448	1	1	9.59746e-05	0.0134416	-0.189348	2.24103	2.58345e+09	0.522597	4.57425e+10	5.82902e+10
2008-12-10	5.82535	20	195713	561099436	147267	454404312	0.0208966	0.218805	0.145811	0.994409	1	1	9.57206e-05	0.013615	-0.189798	2.2388	2.59932e+09	0.523635	4.58793e+10	5.84378e+10
2008-12-11	5.82683	20	195640	560837530	147074	452456060	0.0208937	0.217143	0.14629	0.994433	1	1	9.57481e-05	0.0134412	-0.189878	2.23882	2.59839e+09	0.523408	4.58279e+10	5.8381e+10
2008-12-12	5.8283	20	195743	561626359	147140	453148074	0.0209036	0.21709	0.144344	0.994448	1	1	9.56845e-05	0.0135888	-0.189411	2.23818	2.6011e+09	0.523227	4.58377e+10	5.83906e+10
2008-12-13	5.82664	20	195438	559688022	146927	451594647	0.0209373	0.217139	0.144625	0.994449	1	1	9.58635e-05	0.0135082	-0.189445	2.23954	2.59373e+09	0.523485	4.57133e+10	5.82661e+10
2008-12-14	5.82782	20	195403	559478058	146900	451478283	0.0209038	0.217138	0.145049	0.994458	1	1	9.5872e-05	0.0135181	-0.189508	2.24098	2.59369e+09	0.523274	4.5717e+10	5.82637e+10
2008-12-15	5.82082	20	196012	562280240	147802	459084080	0.0209334	0.222575	0.1449	0.994454	1	1	9.55955e-05	0.0136754	-0.188536	2.24029	2.6063e+09	0.524187	4.6532e+10	5.92928e+10
2008-12-16	5.82242	20	196061	562677048	147833	459483814	0.0210392	0.222527	0.146058	0.994468	1	1	9.55025e-05	0.0135754	-0.18883	2.24221	2.60869e+09	0.523675	4.65251e+10	5.92865e+10
2008-12-17	5.82304	20	196040	562494050	147824	459428300	0.021028	0.222236	0.145388	0.994515	1	1	9.55178e-05	0.0135753	-0.188967	2.24468	2.61028e+09	0.523636	4.65231e+10	5.9287e+10
2008-12-18	5.82235	20	196114	562751534	147896	459723932	0.0210294	0.222406	0.144597	0.994541	1	1	9.55405e-05	0.0135901	-0.189282	2.24654	2.61311e+09	0.524059	4.65929e+10	5.93572e+10
2008-12-19	5.82128	20	192331	562567408	144086	459403564	0.0210308	0.222308	0.144607	0.994542	1	1	9.5518e-05	0.0135409	-0.189196	2.21477	2.61214e+09	0.523973	4.65876e+10	5.93416e+10
2008-12-20	5.81734	20	192285	562105593	144055	458736348	0.0210636	0.222199	0.145036	0.994546	1	1	9.55369e-05	0.013515	-0.189596	2.21168	2.60567e+09	0.524438	4.65201e+10	5.92735e+10
2008-12-21	5.8282	20	192095	559352828	143913	456145701	0.0209861	0.221652	0.147216	0.994585	1	1	9.57747e-05	0.0135721	-0.189699	2.25951	2.59692e+09	0.52293	4.6393e+10	5.91397e+10
2008-12-22	5.82526	20	192370	560686209	144122	456954168	0.0210672	0.221524	0.148898	0.994628	1	1	9.56442e-05	0.0134676	-0.189775	2.25933	2.60296e+09	0.523288	4.64338e+10	5.92205e+10
2008-12-23	5.82668	20	192475	561388636	144189	457496304	0.0211395	0.221488	0.149186	0.994645	1	1	9.55996e-05	0.0135433	-0.189683	2.26011	2.60681e+09	0.523204	4.64504e+10	5.92388e+10
2008-12-24	5.8286	20	192613	562302959	144281	458254648	0.0213202	0.221398	0.148415	0.994557	1	1	9.55121e-05	0.0135439	-0.189459	2.26103	2.61366e+09	0.522902	4.64552e+10	5.92559e+10
2008-12-25	5.82692	20	192775	563030981	144430	459002296	0.0213158	0.221603	0.148313	0.994552	1	1	9.54903e-05	0.0137172	-0.189691	2.26208	2.61708e+09	0.523348	4.65406e+10	5.93609e+10
2008-12-26	5.82074	20	188512	560735868	140130	456863337	0.0216206	0.221525	0.147113	0.994586	1	1	9.56861e-05	0.0136746	-0.189789	2.2564	2.57003e+09	0.524251	4.64981e+10	5.93167e+10
2008-12-27	5.82069	20	188543	558632593	140262	455300996	0.0220682	0.221936	0.147742	0.994615	1	1	9.58632e-05	0.0135949	-0.19024	2.25692	2.53946e+09	0.524184	4.64368e+10	5.92446e+10
2008-12-28	5.81983	20	188400	557663755	140161	454470326	0.0220149	0.221918	0.148673	0.99461	1	1	9.59269e-05	0.0136211	-0.190278	2.25809	2.53432e+09	0.524186	4.65263e+10	5.93333e+10
2008-12-29	5.81972	20	188247	556686290	140064	453835156	0.0223141	0.221929	0.149026	0.994614	1	1	9.60098e-05	0.0136003	-0.190387	2.25952	2.53183e+09	0.524246	4.65248e+10	5.93204e+10
2008-12-30	5.81859	20	188444	557625001	140267	455175782	0.0222884	0.222894	0.14806	0.994532	1	1	9.59235e-05	0.0136279	-0.190578	2.26113	2.53779e+09	0.524403	4.65716e+10	5.94003e+10
2008-12-31	5.8422	20	185653	540643829	138198	442464883	0.022293	0.222747	0.147736	0.994542	1	1	9.69929e-05	0.01345	-0.189294	2.26825	2.46417e+09	0.518532	4.62311e+10	5.90533e+10
2009-01-01	5.97612	19	152812	444852122	107235	365713758	0.0223846	0.218498	0.146056	0.994476	1	1	0.00010569	0.0118572	-0.1802	2.11274	2.05346e+09	0.494333	4.36476e+10	5.60714e+10
2009-01-02	5.97569	18	147484	441326939	102537	362183136	0.0224347	0.217778	0.145576	0.994469	1	1	0.00010612	0.0119121	-0.179493	2.1078	2.04118e+09	0.494354	4.35661e+10	5.59844e+10
2009-01-03	5.97716	18	147435	441072671	102505	362119546	0.0227355	0.217921	0.145155	0.994481	1	1	0.000106167	0.0119246	-0.179635	2.10947	2.04125e+09	0.494261	4.35973e+10	5.6037e+10
2009-01-04	5.97479	18	147694	442641562	102675	363170981	0.0228791	0.217809	0.1446	0.994477	1	1	0.000105944	0.0118828	-0.18	2.10566	2.04913e+09	0.494376	4.36899e+10	5.6136e+10
2009-01-05	5.9677	18	148216	445245814	103100	365460164	0.0229074	0.218042	0.143684	0.99447	1	1	0.000105555	0.0119221	-0.179994	2.10557	2.05673e+09	0.494881	4.37789e+10	5.62254e+10
2009-01-06	5.96526	18	148407	446522249	103206	366186810	0.0229642	0.217903	0.144009	0.994485	1	1	0.00010541	0.0121904	-0.180417	2.10538	2.06368e+09	0.495279	4.3843e+10	5.62923e+10
2009-01-07	5.9605	18	148560	447259974	103345	366746868	0.0231691	0.21801	0.144597	0.994517	1	1	0.000105279	0.0121755	-0.180723	2.10546	2.06377e+09	0.495659	4.38832e+10	5.63467e+10
2009-01-08	5.96065	18	148743	448294178	103469	367697026	0.0231963	0.218067	0.144538	0.99452	1	1	0.000105178	0.0121437	-0.18134	2.10829	2.06968e+09	0.495793	4.39651e+10	5.64324e+10
2009-01-09	5.95706	18	148487	448243660	103555	368264044	0.0231562	0.218617	0.142485	0.994547	1	1	0.000105193	0.0120842	-0.181688	2.13863	2.05006e+09	0.496271	4.39508e+10	5.64116e+10
2009-01-10	5.95908	17	144810	449492492	96078	369489420	0.0206528	0.218632	0.125713	0.994411	1	1	0.000105069	0.0120145	-0.181513	2.07991	2.05876e+09	0.496187	4.40423e+10	5.65021e+10
2009-01-11	5.96055	17	144659	448652418	95973	368872746	0.0202138	0.218629	0.124749	0.99429	1	1	0.000105186	0.0120319	-0.181269	2.07946	2.05397e+09	0.496075	4.40288e+10	5.64877e+10
2009-01-12	5.96057	17	144961	450630984	96186	370867764	0.0204888	0.218875	0.123746	0.994253	1	1	0.000104949	0.012081	-0.181399	2.07901	2.06544e+09	0.496083	4.40737e+10	5.65768e+10
2009-01-13	5.95957	17	144974	450628326	96227	370893104	0.0203709	0.218958	0.124675	0.994319	1	1	0.000104958	0.0120783	-0.181658	2.07904	2.06447e+09	0.496258	4.40681e+10	5.6568e+10
2009-01-14	5.95855	17	145009	450770854	96249	370913471	0.0204069	0.21894	0.125088	0.994266	1	1	0.00010496	0.0120218	-0.18165	2.07913	2.06513e+09	0.496452	4.40745e+10	5.65768e+10
2009-01-15	5.95606	17	145230	452049305	96408	371831410	0.0203982	0.218825	0.124801	0.994269	1	1	0.000104817	0.0120687	-0.181937	2.07836	2.07041e+09	0.496801	4.4171e+10	5.669e+10
2009-01-16	5.95921	17	145089	451334194	96301	371085868	0.0204725	0.218699	0.124483	0.994269	1	1	0.000104887	0.0121024	-0.182514	2.07708	2.06575e+09	0.49624	4.41554e+10	5.66813e+10
2009-01-17	5.96086	17	144920	450359231	96185	370312391	0.0207811	0.218694	0.12601	0.994295	1	1	0.000105024	0.0121171	-0.182673	2.078	2.06161e+09	0.496154	4.41507e+10	5.66767e+10
2009-01-18	5.96053	17	144846	449895106	96140	369962485	0.0207406	0.21868	0.126173	0.99429	1	1	0.000105087	0.012123	-0.182564	2.07784	2.0592e+09	0.496237	4.41578e+10	5.66883e+10
2009-01-19	5.95821	17	144834	449720066	96140	369649266	0.0208596	0.218592	0.126376	0.994307	1	1	0.000105146	0.0120775	-0.182709	2.0767	2.05632e+09	0.496725	4.41471e+10	5.66916e+10
2009-01-20	5.96034	17	144947	451126810	96274	370585476	0.0208686	0.218548	0.129605	0.994406	1	1	0.000105101	0.0120677	-0.182799	2.08062	2.06519e+09	0.497136	4.42416e+10	5.67903e+10
2009-01-21	5.97371	17	144940	452138220	96274	372595992	0.0207131	0.219182	0.130658	0.994475	1	1	0.000105087	0.0120305	-0.182995	2.08044	2.08676e+09	0.49596	4.42489e+10	5.67977e+10
2009-01-22	5.97874	17	144943	452298256	96259	372984195	0.0208396	0.219216	0.130216	0.994465	1	1	0.000105092	0.0120215	-0.182852	2.08307	2.08762e+09	0.495468	4.44951e+10	5.71323e+10
2009-01-23	5.97983	17	144937	452307647	96255	373021594	0.0208118	0.219231	0.129246	0.994452	1	1	0.000105083	0.0120094	-0.182703	2.08374	2.08788e+09	0.495309	4.45081e+10	5.71458e+10
2009-01-24	5.97615	17	144749	451074379	96153	372075291	0.0210243	0.219406	0.128838	0.994438	1	1	0.000105199	0.0119224	-0.183039	2.08024	2.07891e+09	0.495587	4.4494e+10	5.71317e+10
2009-01-25	5.97656	17	144680	450664636	96105	371760271	0.0210851	0.21942	0.12857	0.994446	1	1	0.000105236	0.0119282	-0.183084	2.08046	2.07703e+09	0.495497	4.44903e+10	5.71269e+10
2009-01-26	5.97952	17	144603	450227192	96034	371592544	0.0212582	0.219482	0.129179	0.994528	1	1	0.000105258	0.0119402	-0.182927	2.07796	2.07495e+09	0.494953	4.44765e+10	5.71097e+10
2009-01-27	5.97947	17	144547	449856350	95995	371262607	0.0212377	0.219459	0.128892	0.994438	1	1	0.000105304	0.0119455	-0.182928	2.07834	2.07354e+09	0.494978	4.44715e+10	5.71043e+10
2009-01-28	5.97882	17	144435	449148020	95925	370662688	0.021318	0.219451	0.127893	0.994366	1	1	0.000105398	0.0119546	-0.183055	2.07819	2.0706e+09	0.495119	4.44394e+10	5.70722e+10
2009-01-29	5.97933	17	144342	448599972	95866	370217194	0.0213554	0.219435	0.128365	0.994356	1	1	0.000105443	0.0119624	-0.183004	2.07817	2.06809e+09	0.494969	4.44338e+10	5.70623e+10
2009-01-30	5.98224	17	144400	449038331	95940	370793313	0.0214483	0.219616	0.128438	0.994358	1	1	0.000105398	0.0119593	-0.182837	2.07918	2.07023e+09	0.494613	4.44534e+10	5.70855e+10
2009-01-31	5.98157	17	143880	445842318	95602	368046576	0.0213746	0.219616	0.12849	0.994303	1	1	0.000105739	0.0119263	-0.182861	2.07981	2.05582e+09	0.49453	4.43634e+10	5.69821e+10
2009-02-01	5.97525	17	144094	444568825	96377	366459296	0.0215143	0.21921	0.129492	0.994354	1	1	0.000105735	0.0118997	-0.183492	2.08253	2.04245e+09	0.494534	4.45528e+10	5.71698e+10
2009-02-02	5.95138	17	143280	438664383	95877	360941648	0.0215116	0.219458	0.129145	0.994356	1	1	0.00010635	0.0119201	-0.182967	2.0668	1.99428e+09	0.496828	4.45166e+10	5.71389e+10
2009-02-03	5.95178	17	143319	438910454	95903	361136173	0.0214666	0.21941	0.12947	0.994404	1	1	0.000106331	0.0119196	-0.182902	2.06675	1.99543e+09	0.496844	4.45229e+10	5.71444e+10
2009-02-04	5.95273	17	143376	439414557	95925	361451685	0.0214267	0.219299	0.129597	0.99441	1	1	0.000106294	0.0118817	-0.182989	2.06513	1.99703e+09	0.496828	4.45571e+10	5.72331e+10
2009-02-05	5.95123	17	143016	438581344	95035	360733112	0.0214706	0.219281	0.129877	0.994436	1	1	0.000106422	0.0118806	-0.183126	2.06239	1.99404e+09	0.497181	4.4558e+10	5.72432e+10
2009-02-06	5.94732	17	142202	438220390	95022	360430080	0.0215777	0.219524	0.130033	0.994479	1	1	0.00010648	0.0120079	-0.183309	2.07742	1.99108e+09	0.497654	4.4573e+10	5.72627e+10
2009-02-07	5.94718	17	142190	438138338	95015	360369176	0.0216464	0.219545	0.128874	0.994365	1	1	0.000106477	0.0120089	-0.183467	2.07728	1.99072e+09	0.497611	4.45868e+10	5.72726e+10
2009-02-08	5.94923	17	142243	438577964	95047	360884140	0.0217137	0.219643	0.12785	0.994356	1	1	0.000106441	0.0121143	-0.183425	2.07769	1.99753e+09	0.497435	4.48633e+10	5.77023e+10
2009-02-09	5.95473	17	142564	440720719	95227	362494554	0.021736	0.219255	0.130626	0.994545	1	1	0.000106224	0.0120937	-0.183421	2.08141	2.00889e+09	0.49703	4.4874e+10	5.7722e+10
2009-02-10	5.95453	17	142959	443172578	95440	364178959	0.0218245	0.218922	0.130274	0.994536	1	1	0.000105976	0.0122163	-0.184075	2.08042	2.01942e+09	0.497271	4.52865e+10	5.81346e+10
2009-02-11	5.95663	18	147493	443619422	102717	364327824	0.0218924	0.218724	0.130179	0.994594	1	1	0.000105926	0.0122322	-0.184188	2.11973	2.02132e+09	0.497009	4.52279e+10	5.8077e+10
2009-02-12	5.95704	18	147753	445250685	102888	365645168	0.0219333	0.218678	0.130313	0.994595	1	1	0.000105733	0.0122066	-0.184225	2.12004	2.0276e+09	0.496958	4.52607e+10	5.81103e+10
2009-02-13	5.95524	18	147768	445261951	102901	365569619	0.0219902	0.218662	0.129393	0.99454	1	1	0.000105732	0.0122145	-0.184516	2.11973	2.02596e+09	0.497206	4.52861e+10	5.81371e+10
2009-02-14	5.95496	18	147708	444877153	102864	365295810	0.021928	0.218693	0.129359	0.994536	1	1	0.000105785	0.0122172	-0.18441	2.11967	2.02412e+09	0.497278	4.52895e+10	5.81405e+10
2009-02-15	5.95609	18	147880	445908602	102981	366152395	0.0220685	0.218679	0.129244	0.994461	1	1	0.000105654	0.0121502	-0.184799	2.12115	2.02861e+09	0.497081	4.53298e+10	5.81832e+10
2009-02-16	5.95585	18	148107	447276492	103188	367790104	0.0219668	0.219301	0.127523	0.994429	1	1	0.000105493	0.0121555	-0.185064	2.12148	2.03574e+09	0.49715	4.53316e+10	5.81895e+10
2009-02-17	5.95584	18	148127	447421362	103206	367895820	0.0217906	0.219272	0.127603	0.994411	1	1	0.000105498	0.01218	-0.185148	2.12163	2.03648e+09	0.497276	4.53414e+10	5.81954e+10
2009-02-18	5.96056	18	148965	449970594	103504	370193220	0.0218199	0.219201	0.127386	0.994299	1	1	0.000105242	0.012259	-0.185086	2.09783	2.07576e+09	0.496966	4.55386e+10	5.8444e+10
2009-02-19	5.96005	18	149042	450371515	103564	370465928	0.0218093	0.219188	0.127498	0.994329	1	1	0.000105225	0.0122271	-0.185079	2.09858	2.07036e+09	0.497171	4.55651e+10	5.84712e+10
2009-02-20	5.95781	18	149213	451521554	103669	371263204	0.0217681	0.219026	0.127149	0.994323	1	1	0.000105122	0.0122421	-0.185269	2.09868	2.0743e+09	0.497609	4.56264e+10	5.85364e+10
2009-02-21	5.96267	18	149050	450862527	103543	371115546	0.0218081	0.218996	0.129957	0.994267	1	1	0.00010519	0.0121912	-0.185434	2.09884	2.07129e+09	0.496838	4.56069e+10	5.85167e+10
2009-02-22	5.9621	18	148970	450379701	103485	370666902	0.0218042	0.218964	0.12991	0.99427	1	1	0.000105246	0.0121971	-0.185694	2.09843	2.06902e+09	0.496913	4.56088e+10	5.85185e+10
2009-02-23	5.9622	19	159658	451194049	115661	370996922	0.0218973	0.218189	0.129915	0.994249	1	1	0.000105177	0.0121869	-0.185736	2.15236	2.07525e+09	0.497137	4.56435e+10	5.86305e+10
2009-02-24	5.95994	19	159806	451829970	115758	371202580	0.0218415	0.217873	0.129889	0.994234	1	1	0.000105082	0.0121754	-0.185721	2.15277	2.07837e+09	0.497422	4.56581e+10	5.8645e+10
2009-02-25	5.95881	19	159910	452404959	115925	372739747	0.021799	0.218985	0.130655	0.994225	1	1	0.000105001	0.012154	-0.185833	2.15218	2.08302e+09	0.497502	4.56916e+10	5.86915e+10
2009-02-26	5.95194	19	159904	452029998	115934	371903471	0.0218764	0.218698	0.131351	0.99425	1	1	0.000105019	0.012068	-0.186317	2.15073	2.07992e+09	0.49824	4.56899e+10	5.86921e+10
2009-02-27	5.95248	19	159908	452070845	115939	371948190	0.0220237	0.218668	0.131464	0.994256	1	1	0.000105045	0.0121511	-0.186522	2.15176	2.08101e+09	0.498348	4.56832e+10	5.8686e+10
2009-02-28	5.9501	19	159984	452403704	116012	372225324	0.0221406	0.218759	0.131685	0.994259	1	1	0.000105005	0.0122307	-0.186588	2.1489	2.07748e+09	0.498613	4.5677e+10	5.86804e+10
2009-03-01	5.96668	19	160226	456538710	115950	372811108	0.0220318	0.21523	0.130808	0.994234	1	1	0.000104684	0.0119703	-0.186929	2.18059	2.11005e+09	0.497578	4.60794e+10	5.88504e+10
2009-03-02	5.97916	19	160069	456310908	115743	372461216	0.0220399	0.214431	0.131427	0.994256	1	1	0.000104693	0.0118759	-0.186184	2.18362	2.11511e+09	0.49593	4.60488e+10	5.88074e+10
2009-03-03	5.9673	19	160040	455552832	115819	372155109	0.0221473	0.215206	0.13132	0.99426	1	1	0.000104725	0.0118777	-0.186186	2.17972	2.10349e+09	0.497144	4.60973e+10	5.88514e+10
2009-03-04	5.97017	19	159937	455034442	115740	371826113	0.0221145	0.215167	0.13016	0.994191	1	1	0.000104809	0.0118936	-0.185922	2.18255	2.10201e+09	0.496951	4.60903e+10	5.88357e+10
2009-03-05	5.9686	19	160061	455651939	115854	372291538	0.0222386	0.215258	0.130931	0.994188	1	1	0.000104758	0.0118811	-0.186206	2.1823	2.10595e+09	0.497241	4.61644e+10	5.89051e+10
2009-03-06	5.96842	19	160154	456154517	115930	372781166	0.0224649	0.215364	0.130795	0.994188	1	1	0.000104698	0.0117743	-0.1862	2.18145	2.10909e+09	0.497252	4.62273e+10	5.89819e+10
2009-03-07	5.97238	19	160021	455497978	115812	372183581	0.0224228	0.215199	0.130582	0.994183	1	1	0.000104787	0.0118032	-0.186362	2.18477	2.10516e+09	0.496809	4.61349e+10	5.88775e+10
2009-03-08	5.97192	19	159904	454799400	115728	371586336	0.0224656	0.215189	0.130888	0.994176	1	1	0.000104881	0.0118118	-0.186304	2.18534	2.10189e+09	0.496953	4.61314e+10	5.88643e+10
2009-03-09	5.97104	19	160071	455986277	115908	372823538	0.0224027	0.215573	0.131305	0.994187	1	1	0.000104756	0.0118011	-0.186236	2.1913	2.10388e+09	0.497072	4.61657e+10	5.89061e+10
2009-03-10	5.96825	19	160276	456880013	116199	375082684	0.0222812	0.217709	0.131901	0.994212	1	1	0.000104718	0.0118995	-0.186275	2.19259	2.10693e+09	0.49783	4.62153e+10	5.89557e+10
2009-03-11	5.96693	19	160101	455229525	116077	373078844	0.0221637	0.217328	0.133646	0.994211	1	1	0.00010493	0.0118596	-0.186159	2.19742	2.10137e+09	0.498043	4.6215e+10	5.89556e+10
2009-03-12	5.96654	19	160257	456085051	116188	373686717	0.0222637	0.217235	0.136987	0.994091	1	1	0.000104831	0.0118468	-0.186354	2.19785	2.10547e+09	0.498114	4.6225e+10	5.89574e+10
2009-03-13	5.96644	19	160297	456298890	116218	373822964	0.0221843	0.217107	0.136841	0.994136	1	1	0.0001048	0.0118443	-0.186502	2.19776	2.10599e+09	0.498069	4.62217e+10	5.89536e+10
2009-03-14	5.96647	19	160218	455858444	116159	373450684	0.0221474	0.217108	0.137066	0.994167	1	1	0.00010483	0.0118097	-0.186648	2.19769	2.10409e+09	0.497965	4.62189e+10	5.89481e+10
2009-03-15	5.96563	19	160382	456753349	116281	374154698	0.0221872	0.217051	0.138195	0.99418	1	1	0.000104753	0.0118053	-0.186768	2.19747	2.10863e+09	0.498223	4.6234e+10	5.89623e+10
2009-03-16	5.96286	17	144769	456540903	96672	374113431	0.0221381	0.217527	0.137961	0.994149	1	1	0.000104773	0.0116996	-0.18698	2.0797	2.10592e+09	0.498504	4.63153e+10	5.90516e+10
2009-03-17	5.96246	17	144773	456584393	96677	374144482	0.0219754	0.217715	0.139257	0.994146	1	1	0.000104756	0.0116111	-0.187003	2.07941	2.10576e+09	0.498476	4.63274e+10	5.9071e+10
2009-03-18	5.95421	17	147747	456394682	98474	373714230	0.0219436	0.217719	0.138012	0.994121	1	1	0.000104765	0.0115994	-0.187101	2.10825	2.10163e+09	0.499375	4.63371e+10	5.90808e+10
2009-03-19	5.95461	17	147732	456277969	98459	373666918	0.0219342	0.21774	0.137741	0.994093	1	1	0.000104767	0.0115975	-0.187023	2.10983	2.10233e+09	0.499256	4.63117e+10	5.90543e+10
2009-03-20	5.94706	17	147577	458574988	98969	377767968	0.0218632	0.219755	0.138255	0.994126	1	1	0.000104486	0.0117196	-0.186475	2.05784	2.11056e+09	0.500231	4.71195e+10	6.03602e+10
2009-03-21	5.95207	19	159570	457041811	115310	375570593	0.0220763	0.218804	0.138252	0.994074	1	1	0.000104703	0.0116491	-0.186485	2.14593	2.04365e+09	0.499779	4.70528e+10	6.02944e+10
2009-03-22	5.95192	19	159452	456293206	115222	374867020	0.0221448	0.218782	0.138366	0.994046	1	1	0.000104814	0.0116404	-0.186484	2.14697	2.04202e+09	0.499938	4.70468e+10	6.02797e+10
2009-03-23	5.95205	19	159536	456745391	115277	375163954	0.0221393	0.218622	0.142311	0.994146	1	1	0.00010479	0.0116071	-0.186575	2.14741	2.04364e+09	0.50007	4.70937e+10	6.03301e+10
2009-03-24	5.9491	18	159509	457182194	115349	375274552	0.0221968	0.218524	0.143002	0.994124	1	1	0.000104729	0.0116265	-0.186809	2.16177	2.01877e+09	0.50038	4.71034e+10	6.03393e+10
2009-03-25	5.9517	18	159616	457972749	115416	376023972	0.0221942	0.218441	0.143511	0.994149	1	1	0.000104698	0.0118057	-0.186626	2.16179	2.02208e+09	0.50036	4.71099e+10	6.03442e+10
2009-03-26	5.95029	18	159642	458011538	115437	375964876	0.0221147	0.218376	0.143529	0.994154	1	1	0.000104678	0.01183	-0.186788	2.16241	2.02251e+09	0.500524	4.7115e+10	6.03487e+10
2009-03-27	5.95017	18	159648	458150626	115439	376230462	0.0220956	0.218438	0.143123	0.994137	1	1	0.00010465	0.0118344	-0.186788	2.16365	2.02402e+09	0.500487	4.71198e+10	6.03697e+10
2009-03-28	5.95023	18	159604	458228560	115400	376380044	0.0221423	0.218564	0.141898	0.994142	1	1	0.000104633	0.0118327	-0.186622	2.16041	2.02467e+09	0.500449	4.71296e+10	6.03794e+10
2009-03-29	5.94642	17	146833	456902475	98642	375328858	0.0221243	0.218487	0.141126	0.994156	1	1	0.000104759	0.0115886	-0.186726	2.05762	2.0965e+09	0.500736	4.71176e+10	60363923154
2009-03-30	5.94578	17	147018	458255298	98774	376302852	0.0222148	0.218416	0.141066	0.99416	1	1	0.000104608	0.011573	-0.186515	2.05608	2.10133e+09	0.500825	4.71508e+10	6.03854e+10
2009-03-31	5.93891	17	146564	455516286	98479	374087086	0.0221763	0.218646	0.140211	0.994099	1	1	0.000104874	0.0116112	-0.186613	2.04517	2.08713e+09	0.501392	4.68226e+10	5.99861e+10
2009-04-01	5.95176	17	147382	458568408	98771	377251956	0.0221983	0.219413	0.140514	0.994048	1	1	0.000104544	0.0118457	-0.18735	2.05334	2.11938e+09	0.499993	4.69476e+10	6.01021e+10
2009-04-02	5.95222	17	147083	456832064	98562	375851398	0.0222012	0.219455	0.140001	0.994015	1	1	0.000104663	0.0118814	-0.187406	2.05216	2.1123e+09	0.499486	4.69202e+10	6.00664e+10
2009-04-03	5.94269	17	146897	455364677	98492	374588694	0.0223469	0.219848	0.140482	0.994037	1	1	0.000104806	0.0118879	-0.187459	2.04402	2.0937e+09	0.500469	4.70445e+10	6.0195e+10
2009-04-04	5.94249	17	146790	454687751	98419	374020477	0.0224378	0.219869	0.139537	0.99405	1	1	0.0001049	0.0119	-0.187444	2.04436	2.09087e+09	0.500584	4.70261e+10	6.01663e+10
2009-04-05	5.94479	17	146826	455084083	98450	374584324	0.0224664	0.219963	0.1399	0.994102	1	1	0.000104849	0.0118971	-0.187531	2.04401	2.09375e+09	0.500255	4.70348e+10	6.01752e+10
2009-04-06	5.9422	17	146741	454444470	98394	373898732	0.0224567	0.219932	0.13996	0.994105	1	1	0.000104944	0.0118993	-0.187628	2.04344	2.08776e+09	0.500695	4.70237e+10	6.01616e+10
2009-04-07	5.94235	17	146730	454162642	98412	374015024	0.022447	0.220111	0.139689	0.994099	1	1	0.000104992	0.0119284	-0.187537	2.0448	2.08814e+09	0.500777	4.70403e+10	6.01767e+10
2009-04-08	5.93873	17	146822	454693709	98505	374205793	0.0224525	0.22012	0.139746	0.994099	1	1	0.00010493	0.0119366	-0.187547	2.04254	2.08854e+09	0.501262	4.70578e+10	6.01927e+10
2009-04-09	5.94284	17	147162	456259708	98705	375016416	0.0224484	0.219672	0.139779	0.9941	1	1	0.000104785	0.0118807	-0.187694	2.04508	2.088e+09	0.500902	4.70802e+10	6.02149e+10
2009-04-10	5.94278	17	146995	459648382	98240	377684054	0.0224414	0.219463	0.139645	0.994099	1	1	0.000104393	0.0118636	-0.187661	2.04577	2.1037e+09	0.500904	4.70805e+10	6.02286e+10
2009-04-11	5.94363	17	146822	458605686	98146	377171139	0.0223792	0.219563	0.140125	0.994202	1	1	0.00010447	0.0119442	-0.187671	2.04434	2.09837e+09	0.500583	4.7067e+10	6.02141e+10
2009-04-12	5.94781	17	146780	458485326	98120	377203662	0.0222447	0.219476	0.145755	0.994449	1	1	0.000104519	0.01195	-0.187685	2.04612	2.0983e+09	0.500229	4.70668e+10	6.02139e+10
2009-04-13	5.94694	17	146670	458935260	98174	377513488	0.0224085	0.219474	0.146004	0.994496	1	1	0.000104512	0.0119725	-0.187711	2.06182	2.10046e+09	0.50059	4.71225e+10	6.0293e+10
2009-04-14	5.94314	17	146702	458937569	98255	377741830	0.0223879	0.21957	0.146471	0.994471	1	1	0.000104503	0.0119916	-0.187931	2.06159	2.10032e+09	0.501062	4.71173e+10	6.02881e+10
2009-04-15	5.93977	17	146886	459637597	98543	380069813	0.0225898	0.221318	0.147274	0.994489	1	1	0.000104478	0.0120619	-0.188016	2.06465	2.1047e+09	0.501939	4.72156e+10	6.03888e+10
2009-04-16	5.94446	17	146380	458448471	98096	378949482	0.0224686	0.220989	0.147526	0.994499	1	1	0.000104657	0.0121327	-0.187701	2.06945	2.10139e+09	0.501577	4.72212e+10	6.03955e+10
2009-04-17	5.94324	17	146274	457911464	97981	378408454	0.0225064	0.220953	0.147869	0.99452	1	1	0.000104726	0.0120521	-0.187677	2.07008	2.0986e+09	0.501759	4.72615e+10	6.04356e+10
2009-04-18	5.9442	17	146251	458206993	97979	378683384	0.0224741	0.221043	0.147937	0.994519	1	1	0.000104695	0.0120317	-0.187308	2.06649	2.10176e+09	0.501628	4.82628e+10	6.18297e+10
2009-04-19	5.9446	17	146154	457647633	97920	378246155	0.0223747	0.220991	0.148044	0.994485	1	1	0.000104758	0.0119468	-0.187298	2.06684	2.09937e+09	0.501566	4.82418e+10	6.18087e+10
2009-04-20	5.93731	17	146303	458266290	98039	378418255	0.0222738	0.220932	0.148482	0.994486	1	1	0.00010467	0.0119255	-0.18764	2.06589	2.10012e+09	0.502368	4.82913e+10	6.18591e+10
2009-04-21	5.93393	17	146168	457194244	97992	377619542	0.0222342	0.221191	0.147337	0.994392	1	1	0.000104765	0.0119272	-0.18797	2.06849	2.09432e+09	0.502704	4.82754e+10	6.18311e+10
2009-04-22	5.93469	17	146221	457621732	98003	377786401	0.0220456	0.220842	0.147798	0.994397	1	1	0.000104706	0.0119218	-0.187945	2.06815	2.09563e+09	0.502573	4.82854e+10	6.18318e+10
2009-04-23	5.92963	17	146233	458041615	97944	377876660	0.0220456	0.220849	0.148237	0.994411	1	1	0.000104612	0.011918	-0.187976	2.06763	2.09495e+09	0.502943	4.83759e+10	6.19207e+10
2009-04-24	5.92945	17	146291	458396362	98000	378208004	0.0220186	0.220815	0.148245	0.994415	1	1	0.000104579	0.0119168	-0.187834	2.0668	2.09699e+09	0.502998	4.83797e+10	6.1924e+10
2009-04-25	5.92165	17	146257	457866998	97959	377367120	0.022099	0.220733	0.148578	0.994406	1	1	0.000104575	0.0119156	-0.187881	2.06389	2.08584e+09	0.503631	4.84219e+10	6.19685e+10
2009-04-26	5.91931	17	146069	456655942	97834	376395778	0.0220882	0.220976	0.148687	0.994399	1	1	0.000104682	0.0119341	-0.188135	2.06191	2.07975e+09	0.50377	4.84197e+10	6.19624e+10
2009-04-27	5.91868	17	146006	458226637	98057	378374714	0.0220646	0.221982	0.150651	0.994485	1	1	0.000104505	0.0119115	-0.187874	2.06266	2.08711e+09	0.503926	4.84515e+10	6.19985e+10
2009-04-28	5.91315	17	145978	457871749	98053	378032383	0.0222674	0.222138	0.150457	0.994374	1	1	0.000104553	0.0121086	-0.187679	2.05873	2.08168e+09	0.504667	4.8588e+10	6.21406e+10
2009-04-29	5.91675	17	146053	458223878	98114	378469406	0.0221657	0.222099	0.150506	0.994377	1	1	0.000104569	0.0121215	-0.187812	2.05939	2.08511e+09	0.504511	4.86046e+10	6.21536e+10
2009-04-30	5.90786	17	146315	459449037	98269	379284522	0.0221548	0.222268	0.150757	0.994375	1	1	0.00010439	0.0121367	-0.187748	2.05221	2.08323e+09	0.505408	4.86727e+10	6.22834e+10
2009-05-01	5.93519	18	155264	460686745	110323	378939850	0.0221548	0.219239	0.15026	0.994375	1	1	0.000104411	0.0121112	-0.187874	2.16171	2.10961e+09	0.503236	4.9267e+10	6.29347e+10
2009-05-02	5.94197	18	155089	459955186	110179	378341240	0.022126	0.219031	0.150822	0.994396	1	1	0.000104484	0.0120966	-0.187744	2.1629	2.10748e+09	0.502367	4.91973e+10	6.28081e+10
2009-05-03	5.94193	18	155076	459878797	110170	378281754	0.0220625	0.21905	0.152576	0.994421	1	1	0.0001045	0.0120977	-0.187767	2.16293	2.10717e+09	0.50242	4.91982e+10	6.2809e+10
2009-05-04	5.94039	18	155314	461238228	110354	379419882	0.0219283	0.219072	0.153526	0.994432	1	1	0.000104352	0.012074	-0.188001	2.16199	2.11301e+09	0.502645	4.92508e+10	6.28616e+10
2009-05-05	5.88123	18	155312	458552598	110671	376886804	0.0221476	0.220993	0.153478	0.994436	1	1	0.000104155	0.0121315	-0.187585	2.1211	2.10016e+09	0.507335	4.9314e+10	6.2958e+10
2009-05-06	5.87576	18	155294	458125879	110699	376495422	0.0221793	0.22105	0.153636	0.994401	1	1	0.000104226	0.0121936	-0.187587	2.12011	2.0975e+09	0.508151	4.93765e+10	6.30361e+10
2009-05-07	5.87656	18	155363	458555736	110739	376864180	0.0222305	0.22112	0.153577	0.994404	1	1	0.000104174	0.0121075	-0.187328	2.1206	2.0993e+09	0.508032	4.94113e+10	6.30704e+10
2009-05-08	5.87145	18	155536	459330995	110860	377072326	0.0223424	0.220848	0.153495	0.994407	1	1	0.000104087	0.0120709	-0.187637	2.11952	2.10271e+09	0.508718	4.94331e+10	6.31259e+10
2009-05-09	5.86898	18	155312	457963667	110719	376067325	0.0224129	0.220845	0.153479	0.994405	1	1	0.000104232	0.0120852	-0.187796	2.11748	2.09592e+09	0.508961	4.9433e+10	6.31255e+10
2009-05-10	5.86447	18	155311	457759009	110779	376396253	0.0224255	0.2217	0.153734	0.994398	1	1	0.000104263	0.012117	-0.187947	2.11539	2.09371e+09	0.509638	4.94748e+10	6.31658e+10
2009-05-11	5.86335	18	155237	457231778	110718	375812986	0.0222567	0.221585	0.153627	0.994307	1	1	0.000104344	0.0121065	-0.187683	2.11584	2.0917e+09	0.509879	4.94842e+10	6.31743e+10
2009-05-12	5.84941	17	145999	455779632	98328	374435164	0.022336	0.222027	0.160797	0.994371	1	1	0.000104446	0.0121085	-0.187611	2.01715	2.07366e+09	0.511176	4.95203e+10	6.32044e+10
2009-05-13	5.84747	17	145954	455263341	98301	373929682	0.0223554	0.221979	0.159714	0.994365	1	1	0.000104543	0.0121101	-0.187703	2.01784	2.0705e+09	0.511632	4.95131e+10	6.31967e+10
2009-05-14	5.84494	17	145983	455357891	98321	373921816	0.0224788	0.222005	0.159746	0.994357	1	1	0.00010454	0.0121883	-0.187638	2.0157	2.06592e+09	0.511952	4.95262e+10	6.32114e+10
2009-05-15	5.83434	17	146028	455552767	98672	377383658	0.0225271	0.225897	0.159749	0.994349	1	1	0.000104492	0.0122724	-0.18642	2.0141	2.0615e+09	0.513245	4.98952e+10	6.37094e+10
2009-05-16	5.83482	17	145785	453114221	98586	375391883	0.0226078	0.225791	0.159847	0.994347	1	1	0.000104721	0.0122101	-0.186384	2.0179	2.05161e+09	0.512949	4.983e+10	6.36415e+10
2009-05-17	5.83529	17	145659	452351474	98501	374808088	0.0224957	0.225741	0.159291	0.994289	1	1	0.000104803	0.0122212	-0.186241	2.01798	2.04887e+09	0.512855	5.00172e+10	6.38286e+10
2009-05-18	5.8326	17	145783	454834024	98785	376587572	0.0225484	0.225616	0.159574	0.994313	1	1	0.000104491	0.0123273	-0.18571	2.01671	2.06004e+09	0.51312	5.00645e+10	6.38799e+10
2009-05-19	5.8304	17	145794	454735088	98804	376521876	0.0226265	0.225622	0.159954	0.994354	1	1	0.000104513	0.0123307	-0.185663	2.01695	2.05957e+09	0.513532	5.00643e+10	6.3871e+10
2009-05-20	5.8222	17	146097	456352387	99020	377557234	0.0227017	0.225757	0.159849	0.994348	1	1	0.000104302	0.0124747	-0.185204	2.01247	2.06657e+09	0.514484	5.02275e+10	6.40404e+10
2009-05-21	5.82167	17	146088	456383791	98995	377389472	0.0226819	0.225589	0.160421	0.994393	1	1	0.000104285	0.0125037	-0.18511	2.01064	2.06631e+09	0.5145	5.01739e+10	6.39821e+10
2009-05-22	5.81779	17	146085	456225214	99018	377137096	0.0226494	0.225587	0.161742	0.994402	1	1	0.000104335	0.0125722	-0.18512	2.00812	2.06583e+09	0.515188	5.01814e+10	6.39896e+10
2009-05-23	5.82004	17	146057	456110614	98997	377179028	0.0226254	0.225589	0.16175	0.994394	1	1	0.000104357	0.0125769	-0.185185	2.01079	2.0696e+09	0.514982	5.01837e+10	6.39918e+10
2009-05-24	5.81929	17	145955	455468863	98929	376612766	0.0226692	0.225567	0.164019	0.99441	1	1	0.000104407	0.0125601	-0.185121	2.00976	2.06582e+09	0.514945	5.01674e+10	6.39742e+10
2009-05-25	5.81807	17	146056	456101413	98979	376937414	0.0226692	0.225419	0.164026	0.994418	1	1	0.000104407	0.0125659	-0.185074	2.0098	2.06852e+09	0.515488	5.02354e+10	6.40439e+10
2009-05-26	5.81618	16	142640	456681676	92924	377582756	0.022527	0.225536	0.164573	0.994409	1	1	0.00010431	0.0126489	-0.184437	1.94897	2.06808e+09	0.515529	5.02421e+10	6.40509e+10
2009-05-27	5.80929	16	142607	455995411	92900	376721752	0.0225524	0.225341	0.164746	0.994487	1	1	0.000104394	0.0126655	-0.184289	1.94865	2.06472e+09	0.516622	5.02626e+10	6.4074e+10
2009-05-28	5.80873	16	142538	455515003	92850	376342874	0.0227089	0.225249	0.164797	0.994482	1	1	0.000104431	0.0126194	-0.184202	1.94993	2.06668e+09	0.516605	5.02526e+10	6.40639e+10
2009-05-29	5.81106	16	142363	454534056	92761	375639436	0.0226948	0.225236	0.164898	0.994518	1	1	0.000104532	0.0125199	-0.183923	1.95079	2.06374e+09	0.516258	5.02456e+10	6.40501e+10
2009-05-30	5.80853	16	142158	453101792	92640	374386768	0.0227104	0.225205	0.16522	0.994521	1	1	0.000104714	0.0125205	-0.18397	1.95027	2.0573e+09	0.516714	5.02268e+10	6.40305e+10
2009-05-31	5.81205	16	141812	451056133	92256	371122145	0.0227104	0.223382	0.164234	0.994492	1	1	0.00010493	0.012396	-0.184073	1.95411	2.05129e+09	0.516184	5.01919e+10	6.39928e+10
2009-06-01	5.79472	16	140994	447764498	92094	367492228	0.0227972	0.223148	0.16428	0.994483	1	1	0.000105503	0.0128248	-0.183889	1.97695	2.02237e+09	0.51972	5.11501e+10	6.49236e+10
2009-06-02	5.80203	17	141222	446599610	91846	366702964	0.0227758	0.223122	0.163927	0.99448	1	1	0.000105678	0.0127591	-0.183614	1.99707	2.01729e+09	0.518856	5.11357e+10	6.48636e+10
2009-06-03	5.80164	17	141369	447434264	91930	367266928	0.0228416	0.223006	0.165074	0.994458	1	1	0.000105565	0.0126848	-0.183577	1.99768	2.02089e+09	0.518831	5.11618e+10	6.48925e+10
2009-06-04	5.80115	17	141435	447900963	91991	367629572	0.0228216	0.223051	0.165148	0.994465	1	1	0.000105504	0.0125465	-0.183528	1.99777	2.02888e+09	0.518888	5.11564e+10	6.48883e+10
2009-06-05	5.79761	17	141562	448780610	92877	368783492	0.0228528	0.22376	0.164899	0.994463	1	1	0.000105362	0.0125066	-0.183217	1.9974	2.03246e+09	0.519193	5.12146e+10	6.49557e+10
2009-06-06	5.79848	17	141538	448703581	92854	368739308	0.0228685	0.223794	0.165492	0.994493	1	1	0.000105363	0.0125588	-0.183303	1.99746	2.03222e+09	0.519051	5.11962e+10	6.49487e+10
2009-06-07	5.80007	17	141365	447529263	92714	367826406	0.0228929	0.223853	0.167148	0.9945	1	1	0.000105507	0.0126017	-0.183193	1.99901	2.02728e+09	0.518874	5.1187e+10	6.49306e+10
2009-06-08	5.79477	17	141452	447911995	92800	367950954	0.0229715	0.223972	0.167141	0.9945	1	1	0.000105476	0.0126491	-0.183246	1.99676	2.0264e+09	0.51963	5.12112e+10	6.49551e+10
2009-06-09	5.79007	18	148493	447261456	103944	366869412	0.0230617	0.223669	0.167427	0.994503	1	1	0.000105563	0.0126551	-0.183037	2.07326	1.97419e+09	0.520318	5.13637e+10	6.51057e+10
2009-06-10	5.78956	18	148817	448806349	104139	368141206	0.0230676	0.223663	0.168048	0.994514	1	1	0.000105455	0.0126359	-0.183151	2.07359	1.98042e+09	0.520731	5.14521e+10	6.51934e+10
2009-06-11	5.78653	18	148827	448643691	104217	368657532	0.0229967	0.224278	0.168168	0.99452	1	1	0.000105438	0.0126715	-0.183309	2.07384	1.97897e+09	0.52098	5.14384e+10	6.51753e+10
2009-06-12	5.78392	18	148729	447936945	104166	368151044	0.023096	0.224431	0.165533	0.994373	1	1	0.000105537	0.01265	-0.183101	2.07217	1.97368e+09	0.521409	5.14455e+10	65186775620
2009-06-13	5.78713	18	148517	446674704	104020	367374308	0.02284	0.224558	0.165286	0.99438	1	1	0.000105674	0.0126107	-0.182625	2.0741	1.96918e+09	0.520906	5.14292e+10	65170641130
2009-06-14	5.78662	18	148356	445701242	103902	366499004	0.0225669	0.224522	0.16508	0.994354	1	1	0.000105817	0.012624	-0.182423	2.07414	1.96511e+09	0.521121	5.14273e+10	6.51667e+10
2009-06-15	5.7913	18	149094	450601309	104413	370915318	0.0223595	0.224604	0.165169	0.994364	1	1	0.000105317	0.0126366	-0.181559	2.0771	1.99403e+09	0.521076	5.16699e+10	6.54225e+10
2009-06-16	5.78668	17	148447	450891855	104399	371263646	0.0223861	0.224998	0.164939	0.994373	1	1	0.000105223	0.0127319	-0.181441	2.11205	2.08784e+09	0.521297	5.17078e+10	6.54618e+10
2009-06-17	5.78227	17	148201	449321945	104229	369768816	0.0224015	0.224874	0.16479	0.994374	1	1	0.000105394	0.0126735	-0.181599	2.10858	2.07763e+09	0.521814	5.17059e+10	6.54609e+10
2009-06-18	5.78002	17	148278	449651310	104301	370093170	0.0223973	0.225002	0.163652	0.99437	1	1	0.000105366	0.0127095	-0.181426	2.10869	2.07923e+09	0.522227	5.17452e+10	6.55019e+10
2009-06-19	5.78028	17	148177	449167086	104207	369733372	0.0225768	0.224931	0.163331	0.994371	1	1	0.000105407	0.0126406	-0.181527	2.1084	2.0759e+09	0.522106	5.1728e+10	6.54868e+10
2009-06-20	5.77949	17	148182	449177477	104218	369774094	0.0225656	0.225039	0.163912	0.994374	1	1	0.000105422	0.0127876	-0.181825	2.11029	2.07619e+09	0.52235	5.17424e+10	65493414255
2009-06-21	5.77828	17	147904	447428318	104025	368296241	0.0225129	0.225137	0.162946	0.99439	1	1	0.000105606	0.0128134	-0.181984	2.11104	2.06897e+09	0.52244	5.16645e+10	6.54142e+10
2009-06-22	5.77003	17	148141	448226918	104213	368423971	0.0225609	0.225029	0.162766	0.994396	1	1	0.000105544	0.0129072	-0.181822	2.1116	2.07255e+09	0.523774	5.17e+10	6.54511e+10
2009-06-23	5.76781	17	148232	448629495	104284	368628304	0.0224381	0.224983	0.163406	0.994411	1	1	0.000105543	0.0129311	-0.18131	2.11144	2.07391e+09	0.524323	5.174e+10	6.54936e+10
2009-06-24	5.76689	17	148161	448126532	104240	368150944	0.0224975	0.224965	0.162903	0.994177	1	1	0.000105652	0.0128584	-0.181102	2.11138	2.07142e+09	0.524692	5.2409e+10	6.64552e+10
2009-06-25	5.76109	17	148164	447819723	104306	368150870	0.0224748	0.225339	0.162517	0.994176	1	1	0.000105727	0.0128512	-0.180859	2.1091	2.06776e+09	0.525624	5.23914e+10	6.6415e+10
2009-06-26	5.76824	17	148188	448159296	104334	368981860	0.0224734	0.225549	0.162363	0.99417	1	1	0.000105771	0.0127962	-0.180344	2.11582	2.0763e+09	0.525168	5.2439e+10	6.64733e+10
2009-06-27	5.76351	17	147717	445138174	104011	366393998	0.0224848	0.225603	0.162676	0.994181	1	1	0.000106143	0.0127207	-0.180526	2.11564	2.06363e+09	0.525889	5.2425e+10	6.64587e+10
2009-06-28	5.76488	17	147612	444527093	103933	365878973	0.0225335	0.225469	0.164254	0.994263	1	1	0.000106249	0.0127302	-0.180497	2.11751	2.06315e+09	0.525934	5.24222e+10	6.64554e+10
2009-06-29	5.75987	17	147507	444069859	103866	365441262	0.0226492	0.225578	0.16289	0.994124	1	1	0.000106325	0.0128151	-0.180588	2.11409	2.05899e+09	0.526747	5.24557e+10	6.64962e+10
2009-06-30	5.7574	17	147975	446958462	104189	367726277	0.0226692	0.225709	0.162441	0.994095	1	1	0.000106056	0.0128819	-0.180112	2.11323	2.07123e+09	0.527461	5.26422e+10	6.6728e+10
2009-07-01	5.7555	17	146186	436827499	103028	361002830	0.0226992	0.228313	0.162612	0.994092	1	1	0.000107004	0.0132755	-0.179562	2.11534	2.02583e+09	0.526325	5.23874e+10	6.64084e+10
2009-07-02	5.76048	17	146049	436212168	102914	360576206	0.0226993	0.228128	0.162403	0.994091	1	1	0.000107037	0.0132458	-0.179744	2.11855	2.02753e+09	0.525395	5.23587e+10	6.63751e+10
2009-07-03	5.76034	17	146127	436626852	102967	360860522	0.0226463	0.228203	0.162853	0.994151	1	1	0.000106992	0.0132341	-0.179664	2.11799	2.029e+09	0.525418	5.23966e+10	6.6415e+10
2009-07-04	5.75885	17	145906	435309857	102814	359733210	0.0227725	0.228215	0.161834	0.994084	1	1	0.000107169	0.0132451	-0.179577	2.11702	2.02258e+09	0.525706	5.23824e+10	6.64004e+10
2009-07-05	5.76282	17	146757	435326545	102739	359576314	0.0227568	0.227862	0.162199	0.994101	1	1	0.000107225	0.0132762	-0.179686	2.09244	2.02753e+09	0.525582	5.23824e+10	6.63999e+10
2009-07-06	5.7598	17	146918	436585777	102791	360298165	0.0226577	0.227762	0.162355	0.994106	1	1	0.000107044	0.0132509	-0.179721	2.08365	2.02131e+09	0.525822	5.2484e+10	6.65034e+10
2009-07-07	5.75626	17	146069	436601601	102847	360224786	0.0227943	0.227906	0.162235	0.994136	1	1	0.000107054	0.0132238	-0.180273	2.10914	2.01885e+09	0.526316	5.24837e+10	6.65025e+10
2009-07-08	5.75679	17	146225	437492428	102925	360828569	0.0227512	0.227862	0.163185	0.994144	1	1	0.000106944	0.0131134	-0.180013	2.10784	2.02268e+09	0.526234	5.24995e+10	6.65178e+10
2009-07-09	5.75347	17	146154	436885491	102892	360205254	0.0228678	0.227755	0.164705	0.994153	1	1	0.000107031	0.0131186	-0.179916	2.10806	2.01977e+09	0.526795	5.25257e+10	6.65448e+10
2009-07-10	5.75681	17	146679	439839464	103307	362972052	0.0228375	0.227936	0.16482	0.994158	1	1	0.000106721	0.0131959	-0.179813	2.10772	2.03718e+09	0.526615	5.27209e+10	6.6746e+10
2009-07-11	5.7543	17	146379	437729273	103122	361249401	0.0228476	0.228059	0.164579	0.994126	1	1	0.000106913	0.0132309	-0.17977	2.10857	2.02679e+09	0.52659	5.26952e+10	6.67193e+10
2009-07-12	5.75611	17	146650	438079741	103381	361677220	0.0229936	0.22807	0.164981	0.994134	1	1	0.00010688	0.0131708	-0.179767	2.10869	2.0289e+09	0.526392	5.27041e+10	6.67295e+10
2009-07-13	5.75599	17	146187	439563673	103547	362755967	0.0228824	0.22799	0.158907	0.994143	1	1	0.000106694	0.0132137	-0.179912	2.1842	2.0345e+09	0.526383	5.27685e+10	6.6805e+10
2009-07-14	5.75623	17	146473	440507200	103667	363468896	0.0227705	0.227894	0.159063	0.994078	1	1	0.000106568	0.0132076	-0.179737	2.17355	2.04103e+09	0.526347	5.28034e+10	6.68412e+10
2009-07-15	5.75444	17	146795	442294525	103911	365058551	0.0227734	0.228199	0.159247	0.994118	1	1	0.000106371	0.0132658	-0.179832	2.17484	2.0512e+09	0.526626	5.29589e+10	6.70273e+10
2009-07-16	5.74981	17	146701	441796265	103831	364294597	0.0228204	0.228025	0.159569	0.99412	1	1	0.000106399	0.013389	-0.179967	2.17239	2.04764e+09	0.527252	5.30066e+10	6.70814e+10
2009-07-17	5.7505	17	146808	442276460	103914	364693578	0.0228188	0.22792	0.159497	0.994135	1	1	0.000106361	0.0133773	-0.179941	2.17386	2.05026e+09	0.527298	5.30737e+10	6.71558e+10
2009-07-18	5.75169	17	146837	442511091	103932	364942557	0.022755	0.227955	0.158912	0.994129	1	1	0.000106333	0.0132036	-0.179881	2.17459	2.0516e+09	0.527117	5.32546e+10	6.74115e+10
2009-07-19	5.75018	17	146715	441610449	103867	364284118	0.022704	0.228056	0.158011	0.994106	1	1	0.000106418	0.0131989	-0.179934	2.1753	2.04773e+09	0.527184	5.32485e+10	6.74052e+10
2009-07-20	5.74305	17	147009	443700020	104082	365869866	0.0226303	0.228121	0.158304	0.994115	1	1	0.000106154	0.0131341	-0.179845	2.16995	2.05305e+09	0.528202	5.33174e+10	6.74831e+10
2009-07-21	5.74454	17	146965	443458673	104040	365621794	0.0223987	0.228066	0.158529	0.994127	1	1	0.000106207	0.0132807	-0.179842	2.17339	2.05559e+09	0.528164	5.33308e+10	6.74392e+10
2009-07-22	5.74578	17	147195	444911562	104196	366809554	0.0223741	0.227914	0.160273	0.994117	1	1	0.000106	0.0132606	-0.179877	2.17435	2.06176e+09	0.527796	5.35456e+10	6.76584e+10
2009-07-23	5.74429	17	147237	445011220	104262	367169096	0.0223293	0.228248	0.160099	0.994121	1	1	0.000106013	0.0132668	-0.17975	2.17437	2.06245e+09	0.528197	5.35782e+10	6.7696e+10
2009-07-24	5.74246	17	147121	444369079	104181	366539624	0.0223933	0.228223	0.159543	0.994106	1	1	0.000106132	0.0132813	-0.179866	2.17043	2.05803e+09	0.528666	5.35252e+10	6.76616e+10
2009-07-25	5.74262	17	147043	444024527	104116	366246930	0.0224529	0.228195	0.160407	0.994128	1	1	0.000106185	0.0132848	-0.180382	2.17088	2.0573e+09	0.528769	5.3532e+10	6.76667e+10
2009-07-26	5.7435	17	147003	443878186	104092	366266620	0.0224115	0.228315	0.16086	0.994173	1	1	0.000106191	0.0132885	-0.180441	2.17042	2.05597e+09	0.52853	5.34961e+10	6.76108e+10
2009-07-27	5.74366	17	147161	444819161	104207	367068120	0.0223947	0.228342	0.161833	0.994245	1	1	0.000106054	0.0132414	-0.180546	2.17045	2.06042e+09	0.528383	5.35291e+10	6.76404e+10
2009-07-28	5.74364	17	147320	445818752	104325	367931244	0.022285	0.228455	0.161383	0.994248	1	1	0.000105925	0.0132535	-0.180621	2.16996	2.06444e+09	0.528347	5.35558e+10	6.76734e+10
2009-07-29	5.74167	17	147174	444807850	104242	367011316	0.0221932	0.228437	0.161702	0.994079	1	1	0.000106078	0.0132815	-0.180191	2.16946	2.05933e+09	0.528788	5.3585e+10	6.77175e+10
2009-07-30	5.74027	17	147455	446415730	104441	368221724	0.0221682	0.228405	0.161988	0.994081	1	1	0.000105882	0.0135053	-0.179745	2.16898	2.06654e+09	0.528946	5.3616e+10	6.77628e+10
2009-07-31	5.74377	17	147458	446472930	104437	368362561	0.0221293	0.228253	0.161349	0.994068	1	1	0.000105836	0.0135014	-0.17931	2.17019	2.06717e+09	0.528239	5.36198e+10	6.7775e+10
2009-08-01	5.74492	17	147491	444988080	104407	367849404	0.0221225	0.229249	0.161164	0.994071	1	1	0.000106107	0.0134235	-0.178854	2.14619	2.05502e+09	0.528477	5.38042e+10	6.79619e+10
2009-08-02	5.75073	17	147062	442294032	104084	365621738	0.0221252	0.229121	0.160806	0.994085	1	1	0.000106433	0.0133074	-0.178719	2.14947	2.04263e+09	0.527699	5.36501e+10	6.78077e+10
2009-08-03	5.75215	18	148552	442831687	104151	365912409	0.0221712	0.228948	0.161195	0.994021	1	1	0.00010644	0.0134364	-0.178798	2.04639	1.99612e+09	0.527892	5.37903e+10	6.80238e+10
2009-08-04	5.74967	18	148671	443426291	104238	366317962	0.0220485	0.228875	0.162444	0.994037	1	1	0.000106368	0.0134241	-0.179189	2.0457	1.99657e+09	0.528218	5.38028e+10	6.80364e+10
2009-08-05	5.74846	18	148756	443904196	104289	366627784	0.0220777	0.228837	0.163245	0.994075	1	1	0.000106329	0.0135594	-0.17923	2.04467	1.99968e+09	0.528465	5.38365e+10	6.80777e+10
2009-08-06	5.74728	18	148781	444027298	104304	366412543	0.0220444	0.228466	0.163075	0.994104	1	1	0.000106336	0.0136012	-0.179305	2.04342	1.99986e+09	0.528709	5.39282e+10	6.81704e+10
2009-08-07	5.74637	18	148849	444385536	104355	366591190	0.0220237	0.22839	0.163211	0.994122	1	1	0.000106298	0.0135854	-0.179513	2.04366	2.00203e+09	0.528887	5.39396e+10	6.81911e+10
2009-08-08	5.74686	18	148771	443994986	104299	366360350	0.0219914	0.228555	0.16197	0.994045	1	1	0.000106336	0.0135908	-0.179422	2.04269	1.99699e+09	0.528774	5.39265e+10	6.81653e+10
2009-08-09	5.74469	18	148648	443184322	104223	365650826	0.0220038	0.228677	0.16237	0.994044	1	1	0.000106412	0.013512	-0.179469	2.04132	1.99095e+09	0.528943	5.39064e+10	6.81308e+10
2009-08-10	5.74043	18	149045	445498123	104455	367232345	0.0219686	0.228558	0.162467	0.994041	1	1	0.000106219	0.0134959	-0.179439	2.03971	2.00108e+09	0.530023	5.41122e+10	6.83541e+10
2009-08-11	5.73706	18	148888	444593687	104356	366349624	0.021863	0.228638	0.16242	0.994041	1	1	0.000106314	0.0135326	-0.179555	2.03709	1.99914e+09	0.530437	5.41582e+10	6.83986e+10
2009-08-12	5.73485	18	149085	445636659	104521	367185572	0.0218814	0.228745	0.163566	0.993898	1	1	0.00010616	0.0135708	-0.179739	2.0356	2.0016e+09	0.530546	5.40939e+10	6.8318e+10
2009-08-13	5.7311	18	148915	444488907	104443	366590204	0.0217134	0.229148	0.168995	0.993907	1	1	0.000106274	0.0135331	-0.179771	2.03366	1.99379e+09	0.530942	5.42409e+10	6.84667e+10
2009-08-14	5.72666	18	148946	444786721	104447	366496754	0.0216889	0.228966	0.168638	0.993874	1	1	0.000106198	0.0136001	-0.179809	2.02957	1.99153e+09	0.531326	5.42782e+10	6.85238e+10
2009-08-15	5.72643	18	148911	444340474	104433	366167512	0.0216685	0.228995	0.168619	0.993872	1	1	0.0001063	0.0135291	-0.179704	2.031	1.99457e+09	0.531623	5.43204e+10	6.8563e+10
2009-08-16	5.7268	18	148711	443228643	104263	365199696	0.0216577	0.228938	0.16874	0.993799	1	1	0.000106412	0.0135635	-0.179969	2.03141	1.98828e+09	0.531448	5.42494e+10	6.84781e+10
2009-08-17	5.72949	18	148946	444720701	104412	366420442	0.0216524	0.228893	0.169336	0.993801	1	1	0.000106234	0.0135523	-0.180242	2.03341	1.99529e+09	0.531105	5.42894e+10	6.85205e+10
2009-08-18	5.73124	18	149157	445999867	104558	367458790	0.0213478	0.228687	0.167761	0.993671	1	1	0.000106129	0.01354	-0.179861	2.03503	2.00238e+09	0.531113	5.43341e+10	6.8579e+10
2009-08-19	5.7308	18	149146	445965431	104551	367439822	0.0213747	0.228646	0.168316	0.993684	1	1	0.000106122	0.0134328	-0.179883	2.03434	2.00185e+09	0.531113	5.43579e+10	6.86028e+10
2009-08-20	5.71586	18	149246	445873150	104623	366324876	0.0213	0.228402	0.168388	0.993692	1	1	0.000106066	0.0134856	-0.179983	2.03257	1.99752e+09	0.532829	5.44242e+10	6.86727e+10
2009-08-21	5.71553	18	149035	444634328	104447	365036332	0.0212867	0.228138	0.168301	0.993696	1	1	0.000106221	0.0135149	-0.1799	2.0319	1.9909e+09	0.532865	5.64211e+10	7.06671e+10
2009-08-22	5.71903	18	148925	444122152	104293	363988209	0.0212947	0.227395	0.16812	0.993712	1	1	0.000106305	0.0135278	-0.179818	2.03531	1.99129e+09	0.532555	5.64168e+10	7.06628e+10
2009-08-23	5.71731	18	148704	443632646	104164	363256896	0.020974	0.227146	0.168424	0.993826	1	1	0.000106352	0.0135198	-0.179902	2.05061	1.9605e+09	0.532723	5.64126e+10	7.06536e+10
2009-08-24	5.71552	18	148753	443850010	104221	363468851	0.0208373	0.227217	0.167825	0.993719	1	1	0.000106331	0.0135108	-0.179803	2.04974	1.96117e+09	0.533012	5.64258e+10	7.06675e+10
2009-08-25	5.70938	18	148839	444013657	104290	363691962	0.0207772	0.227482	0.167969	0.993691	1	1	0.000106358	0.0135773	-0.180315	2.04556	1.95688e+09	0.534198	5.648e+10	7.07242e+10
2009-08-26	5.70822	18	148748	443069453	104192	362918586	0.0207038	0.227463	0.168425	0.993797	1	1	0.000106537	0.0138316	-0.180307	2.0469	1.95314e+09	0.534764	5.64753e+10	7.07275e+10
2009-08-27	5.70875	18	148921	444107345	104316	363820204	0.0206856	0.227549	0.168492	0.993796	1	1	0.000106433	0.0138097	-0.179909	2.04621	1.95942e+09	0.534809	5.64075e+10	7.06606e+10
2009-08-28	5.70842	18	148992	444509044	104370	364146728	0.0206401	0.227592	0.168452	0.993871	1	1	0.000106452	0.0138158	-0.179921	2.04658	1.96164e+09	0.535192	5.64245e+10	7.06773e+10
2009-08-29	5.70482	18	148608	441952990	104128	362148060	0.0204856	0.227442	0.163589	0.993377	1	1	0.000106749	0.0138521	-0.179817	2.04707	1.94771e+09	0.535619	5.64092e+10	7.06568e+10
2009-08-30	5.7053	18	148571	441777251	104104	362021887	0.0204933	0.227472	0.164091	0.993427	1	1	0.000106774	0.0138164	-0.179746	2.04736	1.94737e+09	0.535558	5.64395e+10	7.06847e+10
2009-08-31	5.71618	18	148739	443046392	104135	363287745	0.0204947	0.227292	0.164547	0.993434	1	1	0.000106671	0.0137814	-0.179339	2.05365	1.95741e+09	0.534201	5.64304e+10	7.06742e+10
2009-09-01	5.71051	18	149217	445883473	104431	364605995	0.0205037	0.226328	0.164293	0.99338	1	1	0.000106304	0.0139979	-0.179721	2.04803	1.96869e+09	0.534936	5.77298e+10	7.31429e+10
2009-09-02	5.7072	18	148964	444200109	104274	363118518	0.0204961	0.226236	0.164604	0.993328	1	1	0.000106504	0.0140343	-0.179335	2.04878	1.96038e+09	0.535406	5.77026e+10	7.30562e+10
2009-09-03	5.70677	18	148877	444166548	104188	363001488	0.0205026	0.226236	0.162819	0.993342	1	1	0.000106516	0.014035	-0.179354	2.04592	1.96106e+09	0.535482	5.77206e+10	7.30763e+10
2009-09-04	5.70655	18	148917	444434599	104225	363194440	0.0204884	0.226206	0.162008	0.993319	1	1	0.00010648	0.0141048	-0.179497	2.04547	1.96237e+09	0.535508	5.77468e+10	7.31009e+10
2009-09-05	5.70841	18	148851	444151610	104158	362868695	0.020522	0.226135	0.16392	0.993331	1	1	0.000106512	0.0141101	-0.179802	2.04766	1.96391e+09	0.535297	5.7737e+10	7.3094e+10
2009-09-06	5.7092	18	148838	444141747	104141	362828718	0.020522	0.226113	0.163319	0.99328	1	1	0.00010651	0.0140855	-0.179949	2.04757	1.96369e+09	0.53519	5.7733e+10	7.30891e+10
2009-09-07	5.7087	18	149399	445599740	104311	363947965	0.0205311	0.226062	0.162068	0.993259	1	1	0.000106357	0.0140522	-0.179908	2.00143	1.96998e+09	0.535389	5.77348e+10	7.30949e+10
2009-09-08	5.70758	18	149587	446654341	104457	364881575	0.0205829	0.226164	0.161608	0.99321	1	1	0.000106251	0.0140663	-0.180352	2.00217	1.97435e+09	0.53566	5.77512e+10	7.31124e+10
2009-09-09	5.70536	18	149908	448481287	104691	366424945	0.0206193	0.226285	0.161826	0.993211	1	1	0.000106013	0.0142771	-0.180055	1.99988	1.98032e+09	0.535921	5.77946e+10	7.31559e+10
2009-09-10	5.70052	18	149866	449746082	104888	367265348	0.0206037	0.226236	0.161748	0.993218	1	1	0.000105872	0.0142541	-0.1801	2.04561	1.98382e+09	0.536662	5.78235e+10	7.31809e+10
2009-09-11	5.70019	18	149630	448361098	104719	366115667	0.0205595	0.22621	0.16177	0.993252	1	1	0.000106021	0.0142847	-0.180081	2.04682	1.98065e+09	0.536656	5.78118e+10	7.31599e+10
2009-09-12	5.7008	18	149671	448623378	104743	366438042	0.020597	0.226326	0.172014	0.993162	1	1	0.000105983	0.0142837	-0.179887	2.04721	1.98172e+09	0.536539	5.78134e+10	7.31503e+10
2009-09-13	5.70142	18	149572	448028737	104668	365917892	0.0206492	0.226296	0.171933	0.993095	1	1	0.000106078	0.0143155	-0.179625	2.04867	1.97939e+09	0.536607	5.78078e+10	7.31228e+10
2009-09-14	5.70127	18	149753	449089277	104785	366639010	0.0206415	0.226459	0.171837	0.993103	1	1	0.000105965	0.0143018	-0.179408	2.04878	1.98543e+09	0.536699	5.78276e+10	7.31524e+10
2009-09-15	5.70005	18	150168	451788162	105067	368672871	0.0206403	0.226344	0.172484	0.992926	1	1	0.000105681	0.0142354	-0.179312	2.04481	1.9985e+09	0.537047	5.80114e+10	7.33351e+10
2009-09-16	5.70498	18	150502	453904213	105245	369980516	0.020673	0.225785	0.169655	0.992799	1	1	0.000105424	0.0143777	-0.179159	2.04641	2.01283e+09	0.536347	5.80659e+10	73386098436
2009-09-17	5.70365	18	150384	453150951	105166	369286302	0.0206468	0.22575	0.169241	0.992802	1	1	0.000105524	0.0143853	-0.17917	2.04605	2.00856e+09	0.536583	5.80942e+10	73505855785
2009-09-18	5.70573	18	150419	453675736	105156	369694098	0.0206403	0.225635	0.172525	0.992745	1	1	0.000105466	0.0143832	-0.179226	2.04653	2.01151e+09	0.536352	5.81193e+10	7.35278e+10
2009-09-19	5.70577	18	150358	453247396	105097	369294902	0.0206495	0.225667	0.172601	0.992744	1	1	0.00010551	0.0143991	-0.179374	2.04663	2.00975e+09	0.536331	5.81138e+10	7.35223e+10
2009-09-20	5.70353	18	150236	452423072	105035	368722596	0.0206639	0.225736	0.173747	0.992676	1	1	0.000105642	0.0142716	-0.179589	2.04576	2.00459e+09	0.536841	5.81499e+10	7.35624e+10
2009-09-21	5.70046	18	150126	451677038	104991	368107563	0.02069	0.22572	0.174156	0.992675	1	1	0.000105721	0.0144471	-0.179357	2.04293	1.99868e+09	0.537175	5.81566e+10	7.35677e+10
2009-09-22	5.69893	18	150232	452345417	105077	368737234	0.0206743	0.225938	0.173719	0.992748	1	1	0.000105675	0.0144544	-0.179158	2.04161	2.00142e+09	0.537562	5.81932e+10	7.36159e+10
2009-09-23	5.69801	18	150487	453852674	105223	369831440	0.020715	0.225867	0.174027	0.992563	1	1	0.000105464	0.0144111	-0.178856	2.03879	2.00614e+09	0.537462	5.82051e+10	7.36283e+10
2009-09-24	5.6965	18	150655	454739915	105342	370453342	0.0207006	0.225871	0.174031	0.992571	1	1	0.00010535	0.0144044	-0.17855	2.03922	2.00979e+09	0.537617	5.82349e+10	7.36878e+10
2009-09-25	5.69655	18	150908	456112559	105570	371641483	0.0207006	0.225944	0.174108	0.992563	1	1	0.000105227	0.0144261	-0.178353	2.04069	2.01558e+09	0.53776	5.83072e+10	7.37903e+10
2009-09-26	5.69521	18	150653	454564637	105385	370208619	0.0206954	0.225781	0.174564	0.992562	1	1	0.000105366	0.0145445	-0.178575	2.03956	2.00971e+09	0.537747	5.82518e+10	7.37343e+10
2009-09-27	5.69422	18	150632	454342233	105356	369849117	0.0206678	0.225672	0.174977	0.992742	1	1	0.000105437	0.0146141	-0.17822	2.04042	2.00344e+09	0.538133	5.82628e+10	7.37456e+10
2009-09-28	5.6907	18	150565	454277163	105258	369401478	0.0206955	0.225496	0.169687	0.992607	1	1	0.00010545	0.0145315	-0.178207	2.03221	2.00299e+09	0.538669	5.82954e+10	7.3776e+10
2009-09-29	5.68299	17	148561	452154751	105078	367553867	0.0207073	0.225352	0.169745	0.992603	1	1	0.000105675	0.0143945	-0.178191	2.1396	2.05669e+09	0.539581	5.82462e+10	7.37168e+10
2009-09-30	5.68121	17	148827	453734498	105273	368794816	0.0207127	0.225372	0.170089	0.992594	1	1	0.000105544	0.0144816	-0.178498	2.13889	2.06334e+09	0.54011	5.83151e+10	7.37844e+10
2009-10-01	5.69428	17	148145	449969740	104616	364887732	0.0207009	0.223168	0.169961	0.992602	1	1	0.000105963	0.0146259	-0.178479	2.1421	2.05165e+09	0.538077	5.82483e+10	7.3514e+10
2009-10-02	5.69543	17	147841	447843121	104362	362969644	0.0206654	0.222663	0.169108	0.992651	1	1	0.00010622	0.0145826	-0.178378	2.14156	2.04127e+09	0.537909	5.81601e+10	7.34224e+10
2009-10-03	5.69569	17	147829	447792737	104354	362961514	0.0207166	0.222747	0.168836	0.992571	1	1	0.000106218	0.0145812	-0.178329	2.1416	2.04108e+09	0.537821	5.81569e+10	7.34192e+10
2009-10-04	5.69562	17	147817	447715837	104345	362887805	0.0207482	0.222744	0.169256	0.992427	1	1	0.000106229	0.0145824	-0.17828	2.14164	2.04074e+09	0.53784	5.81565e+10	7.34188e+10
2009-10-05	5.69705	17	147875	448113360	104378	363199392	0.020768	0.222686	0.169033	0.992413	1	1	0.000106187	0.0145782	-0.178187	2.14301	2.04429e+09	0.537686	5.8242e+10	7.35046e+10
2009-10-06	5.6974	17	147794	447641024	104317	362777840	0.0207667	0.222575	0.168632	0.992193	1	1	0.000106254	0.0146271	-0.178095	2.14295	2.04235e+09	0.537674	5.82382e+10	7.3501e+10
2009-10-07	5.6968	17	147728	447236882	104270	362420035	0.0207576	0.222544	0.16883	0.992205	1	1	0.000106301	0.0145418	-0.177987	2.14273	2.04041e+09	0.537755	5.82372e+10	7.35e+10
2009-10-08	5.69704	17	147623	446400010	104196	361656407	0.0207641	0.222513	0.168234	0.992201	1	1	0.000106403	0.0145146	-0.177922	2.14315	2.04015e+09	0.537705	5.82544e+10	7.35173e+10
2009-10-09	5.70283	17	148310	448354143	104434	363695586	0.0207312	0.222716	0.168103	0.992211	1	1	0.000106136	0.0142885	-0.177809	2.09176	2.05416e+09	0.536717	5.82063e+10	7.34702e+10
2009-10-10	5.69911	17	148981	448990960	104299	363977300	0.02073	0.222593	0.167577	0.992213	1	1	0.000106081	0.0143557	-0.178032	2.01675	2.00966e+09	0.537425	5.82775e+10	7.35413e+10
2009-10-11	5.69454	17	147924	446987977	104128	362340584	0.0206957	0.222776	0.167352	0.992305	1	1	0.00010628	0.0144442	-0.178063	2.08472	2.04536e+09	0.537812	5.82448e+10	7.34972e+10
2009-10-12	5.69016	17	148063	447500399	104250	362567814	0.0207494	0.222757	0.165417	0.992534	1	1	0.000106229	0.0144063	-0.178238	2.08496	2.04713e+09	0.538485	5.82898e+10	7.35488e+10
2009-10-13	5.68877	17	148198	448247608	104369	363364498	0.0207086	0.223305	0.165118	0.992504	1	1	0.000106134	0.014389	-0.178158	2.08444	2.04998e+09	0.538685	5.82034e+10	7.34725e+10
2009-10-14	5.68961	17	148444	449814696	104558	364751767	0.02076	0.223395	0.165402	0.992494	1	1	0.000105912	0.0145178	-0.178317	2.08578	2.05766e+09	0.538423	5.82507e+10	7.35231e+10
2009-10-15	5.68682	17	148651	451169118	104775	366121737	0.0207428	0.223823	0.165321	0.992506	1	1	0.000105738	0.0144545	-0.178235	2.08484	2.06354e+09	0.538729	5.84499e+10	7.37153e+10
2009-10-16	5.68462	17	148495	450063931	104728	365647630	0.0207375	0.224365	0.164938	0.992439	1	1	0.000105881	0.0144043	-0.178389	2.08423	2.06111e+09	0.539087	5.84305e+10	7.36919e+10
2009-10-17	5.68643	17	148372	449349035	104665	365255538	0.0207375	0.224506	0.164706	0.992366	1	1	0.000105988	0.0144071	-0.178312	2.08446	2.05717e+09	0.538924	5.8428e+10	7.36894e+10
2009-10-18	5.68597	17	148226	448669392	104590	364742962	0.0207336	0.224577	0.164459	0.992405	1	1	0.000106083	0.0144121	-0.178078	2.08335	2.05357e+09	0.539057	5.84202e+10	7.36716e+10
2009-10-19	5.6819	17	148009	448134136	104546	364151312	0.0207389	0.224455	0.164546	0.992292	1	1	0.000106178	0.0143445	-0.178185	2.08901	2.04776e+09	0.539748	5.84255e+10	7.36676e+10
2009-10-20	5.68608	17	148439	450680624	104762	365891200	0.0207613	0.224055	0.165089	0.992309	1	1	0.000105921	0.0144001	-0.178165	2.09005	2.06034e+09	0.539442	5.854e+10	7.38205e+10
2009-10-21	5.69589	17	148516	451817204	104698	366188280	0.0207812	0.222627	0.165675	0.992458	1	1	0.000105856	0.0143432	-0.178161	2.09293	2.06593e+09	0.538497	5.86255e+10	7.38968e+10
2009-10-22	5.69265	17	148548	451918786	104722	366077296	0.0207654	0.222587	0.165798	0.992466	1	1	0.000105854	0.0142679	-0.1784	2.09098	2.06401e+09	0.538985	5.86208e+10	7.38904e+10
2009-10-23	5.69254	17	148620	452340230	104768	366336346	0.0207285	0.222417	0.169467	0.99267	1	1	0.000105759	0.0142497	-0.178392	2.09125	2.06671e+09	0.53874	5.86643e+10	7.39343e+10
2009-10-24	5.69548	17	148585	452286405	104722	366260871	0.0207986	0.222219	0.163567	0.992431	1	1	0.000105789	0.0142388	-0.178189	2.09273	2.06947e+09	0.538481	5.86391e+10	7.38873e+10
2009-10-25	5.69343	17	148487	451621391	104664	365658098	0.0208052	0.222245	0.163561	0.992327	1	1	0.000105887	0.0142386	-0.177877	2.0915	2.06485e+09	0.538906	5.86628e+10	7.39097e+10
2009-10-26	5.68942	17	148589	452020220	104766	366054178	0.0208199	0.222346	0.163469	0.992509	1	1	0.000105864	0.014147	-0.177896	2.08895	2.0643e+09	0.539584	5.8676e+10	7.39244e+10
2009-10-27	5.68974	17	148742	452979064	104865	366735639	0.0208252	0.222045	0.163429	0.992445	1	1	0.000105772	0.0141353	-0.1775	2.0888	2.06822e+09	0.539646	5.87014e+10	7.39492e+10
2009-10-28	5.68882	17	148853	453480336	104946	367181676	0.0208306	0.222185	0.161736	0.992343	1	1	0.000105726	0.0140353	-0.177359	2.08964	2.07254e+09	0.539889	5.87597e+10	7.40217e+10
2009-10-29	5.68658	17	148564	451651258	104768	365880560	0.0208586	0.222221	0.162088	0.992629	1	1	0.000105998	0.01414	-0.177448	2.08963	2.06471e+09	0.540536	5.88001e+10	7.40619e+10
2009-10-30	5.68404	17	148637	451951127	104840	366156603	0.0208506	0.222176	0.162056	0.992552	1	1	0.000106013	0.0141571	-0.17762	2.0888	2.06545e+09	0.541145	5.8901e+10	7.41768e+10
2009-10-31	5.69019	17	148197	449216978	104521	364039674	0.0208639	0.222029	0.162339	0.992537	1	1	0.000106292	0.0142022	-0.177493	2.09926	2.0583e+09	0.540131	5.88474e+10	7.4114e+10
2009-11-01	5.69507	17	149308	451536794	104866	365503604	0.0208933	0.221123	0.162695	0.992542	1	1	0.000106058	0.0137866	-0.177899	2.08593	2.07821e+09	0.539751	5.90454e+10	7.43125e+10
2009-11-02	5.69099	17	149226	451070180	104825	364580206	0.0208759	0.220771	0.163631	0.992252	1	1	0.000106123	0.0136719	-0.177777	2.08184	2.07154e+09	0.540292	5.90477e+10	7.43075e+10
2009-11-03	5.68732	17	149155	450635742	104763	363910019	0.0208427	0.220765	0.160209	0.992751	1	1	0.000106213	0.0136937	-0.177695	2.07999	2.06784e+09	0.541052	5.90724e+10	7.43364e+10
2009-11-04	5.685	17	149068	450022623	104701	363292215	0.0208882	0.220724	0.158856	0.993094	1	1	0.000106302	0.0138101	-0.177333	2.07891	2.06436e+09	0.541495	5.90901e+10	7.43935e+10
2009-11-05	5.68456	17	149258	451132783	104833	364124479	0.0208762	0.220606	0.158888	0.993193	1	1	0.00010619	0.0137162	-0.177605	2.07903	2.06971e+09	0.541667	5.9104e+10	7.44076e+10
2009-11-06	5.68403	17	149422	451735968	104926	364669056	0.0208534	0.220737	0.158699	0.993179	1	1	0.000106139	0.0135975	-0.177588	2.08014	2.0731e+09	0.541916	5.91197e+10	7.44198e+10
2009-11-07	5.68454	17	149210	450630416	104777	363947600	0.0208708	0.220819	0.158731	0.993168	1	1	0.000106289	0.0136678	-0.177918	2.0784	2.06663e+09	0.541985	5.9106e+10	7.44074e+10
2009-11-08	5.68508	17	149198	450601402	104766	363995198	0.0208963	0.220856	0.159001	0.993134	1	1	0.000106325	0.0136972	-0.178113	2.07896	2.06366e+09	0.542147	5.90846e+10	7.43848e+10
2009-11-09	5.68407	17	149341	451452377	104898	364991242	0.0208802	0.221188	0.159252	0.993183	1	1	0.000106263	0.0136846	-0.178251	2.07863	2.0671e+09	0.542526	5.91019e+10	7.43938e+10
2009-11-10	5.6811	17	149778	454085214	105195	366868144	0.0208215	0.221293	0.158005	0.993025	1	1	0.000105954	0.013765	-0.178617	2.07625	2.07955e+09	0.542921	5.91699e+10	7.44758e+10
2009-11-11	5.68736	17	149923	455233051	105310	367728320	0.0208012	0.221105	0.158799	0.992706	1	1	0.000105829	0.0137497	-0.178554	2.07805	2.08771e+09	0.54213	5.92197e+10	7.45187e+10
2009-11-12	5.68988	17	150051	456226949	105402	368826370	0.0208991	0.22131	0.163398	0.992611	1	1	0.000105695	0.0136379	-0.178414	2.07604	2.09074e+09	0.541576	5.9253e+10	7.4552e+10
2009-11-13	5.68682	17	149960	455549052	105341	368044588	0.0208938	0.221166	0.163445	0.992879	1	1	0.000105832	0.013557	-0.178534	2.07534	2.08595e+09	0.542333	5.92594e+10	7.45557e+10
2009-11-14	5.68782	17	149836	454837519	105225	367333737	0.0208965	0.22116	0.163452	0.992882	1	1	0.000105929	0.0135823	-0.178628	2.07604	2.08335e+09	0.542288	5.92563e+10	7.45526e+10
2009-11-15	5.68391	17	149782	454956432	105270	367213041	0.0209046	0.221008	0.165313	0.992844	1	1	0.000105947	0.0137126	-0.178653	2.07392	2.07967e+09	0.543025	5.93373e+10	7.46499e+10
2009-11-16	5.68669	17	150110	456258614	105530	368363288	0.0209154	0.220814	0.163651	0.992807	1	1	0.000105771	0.0136817	-0.178428	2.07485	2.08904e+09	0.542497	5.93781e+10	7.46902e+10
2009-11-17	5.68408	17	150219	456625945	105670	368652902	0.0209437	0.220916	0.166308	0.993367	1	1	0.0001057	0.0136785	-0.178392	2.07076	2.08997e+09	0.542704	5.93982e+10	7.47026e+10
2009-11-18	5.6846	17	150395	457676672	105794	369518374	0.0209993	0.220919	0.167072	0.993228	1	1	0.000105585	0.0136396	-0.178416	2.07243	2.09667e+09	0.542708	5.94394e+10	7.47487e+10
2009-11-19	5.68471	17	150324	457469509	105733	369347270	0.0209898	0.220893	0.167332	0.993152	1	1	0.000105629	0.0135391	-0.178315	2.06966	2.09403e+09	0.542812	5.94707e+10	7.47838e+10
2009-11-20	5.69238	17	150711	460328214	105940	371416880	0.0209843	0.22038	0.166767	0.992904	1	1	0.000105454	0.0136969	-0.177956	2.06986	2.10893e+09	0.542697	6.01806e+10	7.55053e+10
2009-11-21	5.69258	17	150429	458680828	105743	370143681	0.0210442	0.220428	0.167542	0.993216	1	1	0.000105645	0.0137495	-0.177734	2.06959	2.10093e+09	0.542661	6.0159e+10	7.5481e+10
2009-11-22	5.69238	17	150370	458303208	105702	369832386	0.0210565	0.220433	0.167537	0.993271	1	1	0.000105697	0.0137555	-0.177812	2.06998	2.09954e+09	0.54274	6.01561e+10	7.54772e+10
2009-11-23	5.69044	17	150523	459230686	105808	370507427	0.0210977	0.220366	0.167556	0.993443	1	1	0.000105596	0.0136764	-0.177648	2.06883	2.10321e+09	0.543039	6.019e+10	7.55107e+10
2009-11-24	5.68931	17	150637	459862517	105895	370983779	0.0211169	0.220471	0.167323	0.993454	1	1	0.000105548	0.0136944	-0.177332	2.06852	2.10555e+09	0.543326	6.01958e+10	7.55009e+10
2009-11-25	5.68993	17	150804	460926111	106003	371806674	0.0211486	0.220917	0.166558	0.993586	1	1	0.000105433	0.0134411	-0.17721	2.06879	2.1103e+09	0.543219	6.02483e+10	7.55579e+10
2009-11-26	5.69314	17	150998	462418672	106129	373164972	0.0211624	0.22095	0.166755	0.993575	1	1	0.000105262	0.0134773	-0.177352	2.06789	2.11533e+09	0.542679	6.02984e+10	75609534305
2009-11-27	5.69269	17	150932	462019888	106105	373067972	0.0211444	0.221139	0.166623	0.993571	1	1	0.000105327	0.0135873	-0.177316	2.06758	2.11406e+09	0.542834	6.03495e+10	7.56592e+10
2009-11-28	5.69244	17	150904	461854705	106098	373129830	0.0211431	0.221886	0.166749	0.993639	1	1	0.000105329	0.0134798	-0.177362	2.0671	2.11332e+09	0.542752	6.0346e+10	7.56562e+10
2009-11-29	5.69142	17	150768	460974261	106002	372366210	0.021179	0.221836	0.166856	0.993678	1	1	0.000105425	0.0135046	-0.177496	2.06669	2.10932e+09	0.542893	6.03506e+10	7.56492e+10
2009-11-30	5.68476	17	151105	462752915	106277	373750670	0.0211818	0.22218	0.168314	0.993572	1	1	0.00010524	0.013627	-0.177737	2.06257	2.11351e+09	0.543965	6.05286e+10	7.58348e+10
2009-12-01	5.69187	17	151777	468137296	106646	378010116	0.0213112	0.221879	0.168712	0.993624	1	1	0.000104616	0.0139127	-0.176987	2.06481	2.14133e+09	0.542843	6.98559e+10	8.95216e+10
2009-12-02	5.69574	17	151085	464373916	106104	374657532	0.0213461	0.221372	0.169263	0.993726	1	1	0.000105002	0.0140391	-0.17763	2.06325	2.12679e+09	0.54197	6.96875e+10	8.93244e+10
2009-12-03	5.69667	17	151062	464959431	106061	375256515	0.0213503	0.221576	0.169253	0.993726	1	1	0.000104936	0.0136949	-0.177772	2.0572	2.12536e+09	0.541851	6.97224e+10	8.93621e+10
2009-12-04	5.6966	17	151061	464953552	106063	375283088	0.0214089	0.221711	0.169356	0.993717	1	1	0.000104961	0.0137049	-0.177738	2.05727	2.12574e+09	0.542042	6.97326e+10	8.93729e+10
2009-12-05	5.69609	17	151043	464766109	106041	374969468	0.0214048	0.221754	0.169266	0.993788	1	1	0.000104969	0.0139032	-0.177487	2.05759	2.1257e+09	0.542073	6.92467e+10	8.88803e+10
2009-12-06	5.69473	17	150928	464001068	105962	374251354	0.0213965	0.221706	0.170377	0.993818	1	1	0.000105056	0.0138338	-0.177697	2.05704	2.12162e+09	0.542255	6.92275e+10	8.88604e+10
2009-12-07	5.69207	17	150994	464220567	106022	374391774	0.0214077	0.2217	0.170532	0.993831	1	1	0.000105049	0.0137699	-0.177726	2.05662	2.12291e+09	0.542736	6.91712e+10	8.88034e+10
2009-12-08	5.68993	17	151080	464700343	106087	374692505	0.0214106	0.221626	0.17086	0.993862	1	1	0.000105036	0.0137966	-0.17763	2.05401	2.12286e+09	0.543165	6.92023e+10	8.88321e+10
2009-12-09	5.69065	17	151020	464395235	106039	374490934	0.0213198	0.221605	0.173422	0.993726	1	1	0.000105057	0.0137974	-0.177821	2.05494	2.12277e+09	0.542993	6.92022e+10	8.88372e+10
2009-12-10	5.68981	17	150932	465053839	105704	373839962	0.0214046	0.220654	0.175075	0.993574	1	1	0.000105015	0.0136615	-0.177953	2.05313	2.1317e+09	0.543344	6.92945e+10	8.89191e+10
2009-12-11	5.69177	17	150931	464995731	105664	373649736	0.021332	0.220536	0.175113	0.993382	1	1	0.000104978	0.013651	-0.1778	2.05235	2.13353e+09	0.542862	6.92448e+10	8.88713e+10
2009-12-12	5.69087	17	150764	463904387	105548	372638192	0.0213362	0.220507	0.174721	0.993309	1	1	0.000105092	0.013685	-0.177848	2.05249	2.12848e+09	0.542911	6.92301e+10	8.88511e+10
2009-12-13	5.69111	17	150610	462979659	105421	371685606	0.0213236	0.220209	0.174562	0.993303	1	1	0.000105184	0.0137191	-0.177899	2.05287	2.12489e+09	0.542797	6.92074e+10	8.88277e+10
2009-12-14	5.6892	17	150664	463187010	105480	371946853	0.0213763	0.220355	0.174587	0.993293	1	1	0.000105175	0.0136982	-0.177916	2.05296	2.12561e+09	0.543188	6.92493e+10	8.88817e+10
2009-12-15	5.68215	17	150907	464137397	105723	372935240	0.0213665	0.220925	0.174623	0.993293	1	1	0.000105166	0.0135835	-0.177632	2.05195	2.12905e+09	0.544717	6.93402e+10	8.89728e+10
2009-12-16	5.68218	17	150768	463268509	105645	372408408	0.021419	0.221075	0.174071	0.993174	1	1	0.00010526	0.0133822	-0.177913	2.05267	2.12526e+09	0.544695	6.93348e+10	8.90973e+10
2009-12-17	5.68106	17	150746	463176833	105655	372442146	0.02147	0.221227	0.174086	0.993114	1	1	0.000105272	0.0133728	-0.177976	2.05184	2.12423e+09	0.544841	6.9454e+10	8.92208e+10
2009-12-18	5.68502	17	151061	465171172	105886	374409736	0.021579	0.221404	0.173786	0.993049	1	1	0.000105095	0.0132852	-0.177816	2.056	2.1377e+09	0.544735	6.95071e+10	8.92578e+10
2009-12-19	5.68936	17	150845	464144133	105740	374024406	0.0215762	0.221605	0.173656	0.993135	1	1	0.000105224	0.0133054	-0.177593	2.0566	2.13382e+09	0.54419	6.93609e+10	8.91093e+10
2009-12-20	5.69064	17	151080	465048778	105957	375100706	0.0217018	0.22188	0.172666	0.99311	1	1	0.000105098	0.0133093	-0.177633	2.06068	2.14018e+09	0.543867	6.94116e+10	8.91599e+10
2009-12-21	5.68924	17	150954	464062014	105865	373992969	0.0217638	0.221697	0.161355	0.99281	1	1	0.000105204	0.0132924	-0.177582	2.06097	2.13582e+09	0.544163	6.81562e+10	8.79406e+10
2009-12-22	5.68631	17	151119	464695148	105950	373076591	0.0218022	0.220554	0.162567	0.992967	1	1	0.000105178	0.0132972	-0.177967	2.06487	2.14109e+09	0.544745	6.81926e+10	8.80191e+10
2009-12-23	5.68634	17	151096	464551852	105935	372966506	0.0218122	0.22052	0.163267	0.992985	1	1	0.000105211	0.0132848	-0.178237	2.06493	2.14046e+09	0.544842	6.81736e+10	8.79735e+10
2009-12-24	5.68545	17	151246	465424914	106053	373686396	0.0218052	0.220604	0.163268	0.992922	1	1	0.000105126	0.0133423	-0.17799	2.06493	2.14332e+09	0.545015	6.83819e+10	8.81996e+10
2009-12-25	5.6859	17	151222	465389112	105988	373184919	0.0219702	0.220081	0.163353	0.992249	1	1	0.000105185	0.0133609	-0.178288	2.06505	2.14418e+09	0.545294	6.84838e+10	8.83106e+10
2009-12-26	5.6872	17	150810	462952184	105700	371469608	0.0220843	0.220206	0.163115	0.993526	1	1	0.000105468	0.0134038	-0.178335	2.06532	2.13367e+09	0.545164	6.84317e+10	8.82316e+10
2009-12-27	5.68807	17	150743	462587327	105654	371255680	0.0221159	0.220245	0.163582	0.994832	1	1	0.000105499	0.0133317	-0.17833	2.06595	2.132e+09	0.544998	6.84244e+10	8.8227e+10
2009-12-28	5.68725	17	150887	463464422	105724	371589878	0.0221302	0.219852	0.163819	0.994811	1	1	0.00010542	0.0133517	-0.178076	2.06615	2.13482e+09	0.545243	6.85445e+10	8.83162e+10
2009-12-29	5.68782	17	150921	463728125	105711	371373830	0.0221375	0.219476	0.163865	0.995444	1	1	0.000105382	0.0135403	-0.178012	2.0667	2.13618e+09	0.545074	6.86253e+10	8.84043e+10
2009-12-30	5.68795	17	151089	464756604	105817	372002968	0.0222488	0.219453	0.161987	0.996701	1	1	0.000105323	0.0137312	-0.17806	2.0669	2.1397e+09	0.545377	6.86774e+10	8.84355e+10
2009-12-31	5.72474	17	149967	453528360	105195	364161456	0.0222242	0.21908	0.161868	0.996166	1	1	0.000106621	0.0137036	-0.176327	2.06073	2.10639e+09	0.539873	6.81004e+10	8.78204e+10
2010-01-01	5.86927	16	125221	366052798	82032	295051457	0.0222619	0.215264	0.160438	0.996692	1	1	0.000118031	0.0138323	-0.16765	2.06205	1.73266e+09	0.516864	6.13074e+10	8.11418e+10
2010-01-02	5.87676	16	125020	365208376	81870	294591193	0.0223476	0.215248	0.159799	0.997677	1	1	0.000118222	0.0138284	-0.167563	2.06293	1.72876e+09	0.516136	6.12452e+10	81079548853
2010-01-03	5.87624	16	125156	365962800	81960	295151026	0.0224436	0.215296	0.160958	0.998005	1	1	0.000118112	0.013855	-0.167675	2.06251	1.73194e+09	0.516247	6.1253e+10	81087332703
2010-01-04	5.87558	16	125515	368022959	82212	296832598	0.0224598	0.215185	0.161035	0.99807	1	1	0.000117725	0.013804	-0.167946	2.06106	1.74031e+09	0.516036	6.14512e+10	8.13511e+10
2010-01-05	5.87443	16	125814	369662263	82402	297969066	0.0226321	0.214984	0.161437	0.998318	1	1	0.00011749	0.0139536	-0.168129	2.06239	1.749e+09	0.516373	6.15856e+10	8.14836e+10
2010-01-06	5.87939	16	126029	370832358	82534	298989132	0.0225108	0.215153	0.159872	0.998178	1	1	0.000117353	0.0139291	-0.168112	2.06611	1.75628e+09	0.515971	6.16396e+10	8.15567e+10
2010-01-07	5.87616	16	125960	370298748	82512	298646641	0.0226167	0.215359	0.160578	0.998272	1	1	0.000117434	0.0139489	-0.168647	2.06532	1.75324e+09	0.516336	6.16601e+10	8.15815e+10
2010-01-08	5.87345	16	126035	370853605	82575	299199722	0.0227335	0.215475	0.160225	0.99837	1	1	0.000117394	0.0138891	-0.169441	2.06116	1.75482e+09	0.516898	6.17336e+10	8.16551e+10
2010-01-09	5.87375	16	125919	370213234	82541	298761860	0.0225859	0.215581	0.161059	0.998263	1	1	0.00011746	0.0138972	-0.169499	2.06047	1.75147e+09	0.516713	6.16304e+10	8.15511e+10
2010-01-10	5.86968	16	125913	370088258	82571	298770136	0.0207273	0.215972	0.156318	0.993671	1	1	0.00011749	0.013908	-0.169559	2.06077	1.75112e+09	0.51735	6.1657e+10	8.1577e+10
2010-01-11	5.85931	16	125709	368776629	82488	297560958	0.0204018	0.216028	0.154547	0.993812	1	1	0.000117676	0.0138925	-0.170061	2.05463	1.73954e+09	0.518574	6.16408e+10	8.15573e+10
2010-01-12	5.85832	16	125887	369832805	82612	298456042	0.0203745	0.216125	0.151583	0.993801	1	1	0.000117502	0.0139264	-0.169865	2.05455	1.74463e+09	0.518733	6.16879e+10	8.16197e+10
2010-01-13	5.85524	16	125905	369835642	82644	298377644	0.0202582	0.216066	0.152208	0.993853	1	1	0.000117511	0.013878	-0.170713	2.05413	1.7441e+09	0.519193	6.17118e+10	8.1648e+10
2010-01-14	5.84447	15	122272	369483889	77482	297770203	0.020244	0.216209	0.152163	0.993857	1	1	0.000117477	0.013874	-0.170753	2.01591	1.69351e+09	0.520046	6.17105e+10	8.16468e+10
2010-01-15	5.84251	15	121574	372915878	75587	300526867	0.0202422	0.21607	0.151607	0.993811	1	1	0.000116952	0.0139384	-0.171386	2.00484	1.71025e+09	0.520397	6.18591e+10	8.18037e+10
2010-01-16	5.84965	16	126627	372117156	84358	300208392	0.0201019	0.216097	0.15128	0.993823	1	1	0.000117127	0.0139039	-0.171883	2.0668	1.68961e+09	0.519872	6.14215e+10	8.05789e+10
2010-01-17	5.85013	16	126583	371883637	84330	300034122	0.0200638	0.216107	0.150939	0.993779	1	1	0.000117147	0.0138732	-0.171844	2.06683	1.68876e+09	0.519732	6.14169e+10	8.05743e+10
2010-01-18	5.84726	16	126749	372822725	84436	300904524	0.0200151	0.216467	0.150933	0.993747	1	1	0.000117022	0.0140511	-0.17202	2.06599	1.69341e+09	0.520274	6.14537e+10	8.06191e+10
2010-01-19	5.84369	16	126700	372331326	84412	300361479	0.0199722	0.216428	0.15115	0.993741	1	1	0.000117144	0.0141692	-0.172322	2.06594	1.69074e+09	0.520981	6.14469e+10	8.06101e+10
2010-01-20	5.84381	16	126589	374783665	84672	302269612	0.019942	0.215989	0.151765	0.993725	1	1	0.000116707	0.0141885	-0.172976	2.14002	1.69871e+09	0.520716	6.15457e+10	8.07147e+10
2010-01-21	5.84033	16	126454	373899752	84594	301428568	0.0198726	0.215674	0.152164	0.993731	1	1	0.000116882	0.0142698	-0.17318	2.13863	1.69226e+09	0.52133	6.15376e+10	8.07086e+10
2010-01-22	5.84028	16	126595	374689694	84685	301957372	0.0199385	0.215539	0.153993	0.993834	1	1	0.000116783	0.0142457	-0.173417	2.13927	1.69682e+09	0.521473	6.16289e+10	8.08003e+10
2010-01-23	5.84152	16	126730	374504377	84667	301857966	0.0198113	0.215514	0.153839	0.993842	1	1	0.000116811	0.0142507	-0.17334	2.13619	1.69694e+09	0.521346	6.16109e+10	8.07765e+10
2010-01-24	5.84716	16	126758	374932250	84677	302459050	0.0198193	0.215508	0.153402	0.993815	1	1	0.000116798	0.014248	-0.173323	2.13761	1.70008e+09	0.520857	6.16102e+10	8.07754e+10
2010-01-25	5.817	16	125938	371945442	84548	299775145	0.0198784	0.216353	0.153906	0.993827	1	1	0.000117105	0.0143242	-0.17347	2.09313	1.66294e+09	0.523883	6.16227e+10	8.07843e+10
2010-01-26	5.82282	16	126268	373899709	84737	301086557	0.0199408	0.215995	0.153638	0.99382	1	1	0.000116828	0.0142733	-0.173262	2.099	1.67532e+09	0.523316	6.16522e+10	8.08025e+10
2010-01-27	5.8267	16	126479	375271989	84871	302309778	0.019893	0.216008	0.148311	0.993209	1	1	0.000116626	0.0142515	-0.17329	2.10049	1.68255e+09	0.522879	6.16831e+10	8.08361e+10
2010-01-28	5.82541	16	126756	376910029	85058	303592106	0.019886	0.215997	0.148039	0.993214	1	1	0.00011641	0.0142946	-0.173433	2.09839	1.68869e+09	0.523243	6.17765e+10	8.09334e+10
2010-01-29	5.82674	16	126931	378123604	85162	304537544	0.0198618	0.215933	0.147985	0.993195	1	1	0.000116209	0.0142511	-0.173485	2.09758	1.69432e+09	0.523015	6.18052e+10	8.09772e+10
2010-01-30	5.82372	16	126954	378193188	85247	305179146	0.0196969	0.216668	0.148166	0.993204	1	1	0.000116197	0.0142822	-0.173477	2.09613	1.69021e+09	0.523431	6.18174e+10	8.09896e+10
2010-01-31	5.82532	16	126969	377832401	85238	304711922	0.0196354	0.21641	0.15195	0.9934	1	1	0.000116193	0.0142669	-0.173668	2.08946	1.68936e+09	0.522875	6.18161e+10	8.0984e+10
2010-02-01	5.83583	16	127159	379445149	85308	306333962	0.0197556	0.216677	0.150989	0.9933	1	1	0.000116016	0.0142779	-0.17294	2.0945	1.70179e+09	0.521843	6.18377e+10	8.09409e+10
2010-02-02	5.83529	16	127116	379210640	85290	306223417	0.0196484	0.21672	0.15216	0.993325	1	1	0.000116015	0.0143153	-0.173018	2.09378	1.70056e+09	0.521758	6.18409e+10	8.09457e+10
2010-02-03	5.83402	16	127189	379660201	85373	306885098	0.0197926	0.21715	0.152324	0.99332	1	1	0.000115937	0.0143909	-0.172883	2.09138	1.7008e+09	0.521843	6.18443e+10	8.09491e+10
2010-02-04	5.83419	16	129794	380670181	85188	307510538	0.0197719	0.21692	0.152366	0.993311	1	1	0.000115763	0.0144526	-0.173038	2.03398	1.70761e+09	0.521732	6.18605e+10	8.09654e+10
2010-02-05	5.83769	16	130041	382233745	85346	308836074	0.0195912	0.216868	0.154574	0.993421	1	1	0.000115588	0.0145543	-0.172923	2.0356	1.71637e+09	0.521588	6.19044e+10	8.10142e+10
2010-02-06	5.84069	16	130051	382296616	85335	308755394	0.0197377	0.216678	0.15514	0.993481	1	1	0.000115567	0.0145365	-0.172787	2.03785	1.71695e+09	0.521104	6.18996e+10	8.09957e+10
2010-02-07	5.83965	16	129958	381693879	85286	308188784	0.0197857	0.216626	0.156888	0.993496	1	1	0.00011566	0.0146371	-0.172775	2.03763	1.71475e+09	0.521247	6.1896e+10	8.09811e+10
2010-02-08	5.8363	16	130121	382677306	85423	308946604	0.0199747	0.21676	0.157291	0.993457	1	1	0.00011551	0.0146119	-0.173089	2.03513	1.71822e+09	0.52166	6.19223e+10	8.10064e+10
2010-02-09	5.83454	16	130187	382962278	85476	309036806	0.0199535	0.216602	0.15456	0.993415	1	1	0.000115481	0.0147372	-0.17352	2.03498	1.71961e+09	0.521964	6.19344e+10	8.10199e+10
2010-02-10	5.83421	16	130375	384078479	85604	309902833	0.0200503	0.216581	0.15564	0.993493	1	1	0.000115298	0.0148357	-0.173618	2.03542	1.72452e+09	0.521937	6.19809e+10	8.10585e+10
2010-02-11	5.83507	16	130250	383331585	85528	309323859	0.0200645	0.216547	0.154956	0.993396	1	1	0.000115365	0.0145525	-0.173644	2.03591	1.72178e+09	0.521615	6.19509e+10	8.10272e+10
2010-02-12	5.83483	16	130147	382714224	85459	308814738	0.0201496	0.216578	0.155055	0.993402	1	1	0.000115485	0.0145619	-0.173744	2.03622	1.71928e+09	0.521786	6.19414e+10	8.1017e+10
2010-02-13	5.84705	16	130148	383047450	85182	305982735	0.0201684	0.213129	0.156607	0.993407	1	1	0.000115543	0.0145497	-0.17398	2.04467	1.73632e+09	0.520694	6.19299e+10	8.10048e+10
2010-02-14	5.84641	16	130111	382804197	85169	305765586	0.0201077	0.213122	0.152934	0.993312	1	1	0.00011558	0.0145535	-0.174022	2.04472	1.73537e+09	0.520789	6.19153e+10	8.09901e+10
2010-02-15	5.84428	16	130069	382464522	85157	305378397	0.020012	0.213127	0.153549	0.993362	1	1	0.000115626	0.0143699	-0.174199	2.04431	1.7335e+09	0.521033	6.22988e+10	8.16236e+10
2010-02-16	5.8438	16	129972	381898039	85093	304932623	0.0199805	0.213127	0.153552	0.993331	1	1	0.000115703	0.0143962	-0.174089	2.04352	1.73058e+09	0.52103	6.22793e+10	8.15834e+10
2010-02-17	5.84678	16	130005	382159955	85103	305084734	0.0201047	0.212978	0.152782	0.99329	1	1	0.000115676	0.014395	-0.174144	2.0461	1.73537e+09	0.520745	6.23049e+10	8.16089e+10
2010-02-18	5.84982	16	129938	381890271	85048	304952211	0.0200882	0.212899	0.152661	0.99329	1	1	0.000115748	0.0143755	-0.174211	2.04721	1.73601e+09	0.520547	6.23283e+10	8.16323e+10
2010-02-19	5.84945	16	129844	381331922	84993	304522145	0.0201479	0.212929	0.152677	0.993279	1	1	0.000115803	0.0143873	-0.174253	2.047	1.7336e+09	0.520464	6.22944e+10	8.15633e+10
2010-02-20	5.84703	16	129817	381040570	84966	304111019	0.0202436	0.212857	0.152692	0.993321	1	1	0.000115844	0.0143898	-0.174336	2.04754	1.73199e+09	0.52073	6.23286e+10	8.15992e+10
2010-02-21	5.8428	16	129658	379898525	84869	303009830	0.020284	0.212794	0.152774	0.993343	1	1	0.000115985	0.0144063	-0.174246	2.04653	1.72593e+09	0.521111	6.23209e+10	8.15919e+10
2010-02-22	5.84281	16	129825	380832035	84974	303653836	0.0202959	0.212694	0.153878	0.99335	1	1	0.000115847	0.0143884	-0.174328	2.04666	1.73048e+09	0.521147	6.23354e+10	8.16068e+10
2010-02-23	5.84099	16	129909	381247618	85018	303912726	0.0202801	0.212653	0.154042	0.993364	1	1	0.000115799	0.0143702	-0.174489	2.04552	1.73221e+09	0.521452	6.23649e+10	8.16362e+10
2010-02-24	5.83959	16	129925	381423076	84984	303943082	0.0203972	0.212538	0.152865	0.993302	1	1	0.000115787	0.0143626	-0.17476	2.04354	1.7332e+09	0.521727	6.23641e+10	8.1563e+10
2010-02-25	5.83684	16	129966	381576762	85037	303946794	0.0204708	0.212482	0.152785	0.993252	1	1	0.00011577	0.0143558	-0.174897	2.04135	1.7331e+09	0.522102	6.23988e+10	8.15982e+10
2010-02-26	5.82995	16	129861	381393049	85438	309046724	0.020303	0.218061	0.15226	0.993262	1	1	0.000115735	0.0143028	-0.174874	2.04388	1.7214e+09	0.522967	6.24137e+10	8.16132e+10
2010-02-27	5.83106	16	129727	380665984	85459	308571374	0.0199243	0.21823	0.152098	0.993219	1	1	0.000115825	0.0143165	-0.174911	2.04402	1.7185e+09	0.522702	6.23899e+10	8.1589e+10
2010-02-28	5.8283	16	129819	381151661	85536	308963516	0.0198709	0.218382	0.158946	0.993826	1	1	0.000115707	0.0143031	-0.174986	2.04247	1.71809e+09	0.522823	6.23936e+10	8.15934e+10
2010-03-01	5.80564	15	126999	381598191	85848	309750480	0.0198863	0.219766	0.158942	0.993801	1	1	0.000115655	0.0143068	-0.175618	2.11054	1.71191e+09	0.525799	6.42597e+10	8.43926e+10
2010-03-02	5.81357	16	128404	380520889	85668	309025568	0.0199052	0.219786	0.159566	0.993794	1	1	0.000115796	0.0144341	-0.175952	2.11389	1.71325e+09	0.524722	6.38046e+10	8.39299e+10
2010-03-03	5.81397	16	128442	380880225	85674	309306328	0.0198289	0.219707	0.158623	0.993804	1	1	0.000115749	0.0144321	-0.175957	2.11316	1.71573e+09	0.524678	6.37909e+10	8.3912e+10
2010-03-04	5.81434	16	128560	381569920	85749	309809264	0.0198065	0.219545	0.158095	0.993807	1	1	0.000115631	0.0144203	-0.176126	2.11298	1.71885e+09	0.524581	6.37921e+10	8.39128e+10
2010-03-05	5.81419	16	128735	382560174	85876	310668540	0.019747	0.219567	0.158075	0.993797	1	1	0.000115518	0.0144494	-0.176334	2.11336	1.7231e+09	0.524746	6.38214e+10	8.39421e+10
2010-03-06	5.81219	16	128502	380829668	85692	309245824	0.0197506	0.219583	0.15858	0.993838	1	1	0.000115812	0.0144505	-0.176319	2.11144	1.71504e+09	0.525156	6.37965e+10	8.39076e+10
2010-03-07	5.81215	16	128479	380694589	85676	309134826	0.019577	0.219586	0.159313	0.993836	1	1	0.000115822	0.0143978	-0.176303	2.11152	1.71452e+09	0.525112	6.37925e+10	8.39037e+10
2010-03-08	5.81293	16	128696	382077171	85802	310181004	0.0194287	0.219496	0.159515	0.993844	1	1	0.000115632	0.0144949	-0.176199	2.11289	1.72214e+09	0.52513	6.41824e+10	8.42957e+10
2010-03-09	5.81079	16	128867	383003373	85917	310860266	0.0192764	0.21944	0.160496	0.993855	1	1	0.000115514	0.0145621	-0.176273	2.11238	1.72615e+09	0.52552	6.44977e+10	8.46184e+10
2010-03-10	5.79971	16	129255	384673584	86189	311299344	0.0193545	0.218975	0.160177	0.993857	1	1	0.000115163	0.0145547	-0.175549	2.11084	1.73441e+09	0.526821	6.46409e+10	8.47716e+10
2010-03-11	5.80033	16	129178	383980762	86372	310684851	0.0194604	0.218888	0.161187	0.993923	1	1	0.000115262	0.0145564	-0.175565	2.11257	1.73215e+09	0.526748	6.46399e+10	8.48221e+10
2010-03-12	5.7984	16	129515	383852739	86905	310589903	0.0194063	0.218963	0.167467	0.994052	1	1	0.000115308	0.0145989	-0.175539	2.12815	1.73127e+09	0.527121	6.46557e+10	8.48444e+10
2010-03-13	5.77657	16	124734	380217232	83403	307096724	0.0193874	0.219248	0.167683	0.994143	1	1	0.000115706	0.0146265	-0.175647	2.08443	1.70259e+09	0.529082	6.46462e+10	8.48349e+10
2010-03-14	5.77588	16	124716	380105747	83396	307039467	0.0194288	0.219342	0.168709	0.994165	1	1	0.000115726	0.0146684	-0.175591	2.08471	1.70198e+09	0.529222	6.46425e+10	8.48312e+10
2010-03-15	5.76958	16	125167	382608894	83647	308660874	0.0194436	0.21916	0.168932	0.994172	1	1	0.000115349	0.0146111	-0.175762	2.08082	1.71137e+09	0.530044	6.47127e+10	8.49099e+10
2010-03-16	5.76933	16	125278	383257171	83720	309076874	0.0194097	0.219067	0.167358	0.994067	1	1	0.000115254	0.0145206	-0.175665	2.08046	1.71557e+09	0.530054	6.47457e+10	8.49492e+10
2010-03-17	5.76899	16	125229	382968826	83689	308854811	0.0191257	0.219106	0.168404	0.994119	1	1	0.000115327	0.014526	-0.175827	2.08022	1.71395e+09	0.530231	6.47348e+10	8.49374e+10
2010-03-18	5.76813	16	125721	385841669	83962	310599584	0.019177	0.218421	0.168434	0.99411	1	1	0.000114862	0.014418	-0.176074	2.07978	1.72786e+09	0.530195	6.47557e+10	8.49591e+10
2010-03-19	5.76775	16	125774	386149904	83967	310415000	0.0192307	0.218029	0.168835	0.994119	1	1	0.00011483	0.014375	-0.176403	2.07927	1.73089e+09	0.530359	6.47892e+10	8.49927e+10
2010-03-20	5.76479	16	126010	387487282	84142	311441249	0.0190562	0.218055	0.168724	0.994124	1	1	0.000114598	0.0143424	-0.176086	2.07974	1.7362e+09	0.530716	6.48979e+10	8.51044e+10
2010-03-21	5.76281	16	125767	386019150	83998	310485175	0.0189421	0.218442	0.169243	0.994182	1	1	0.000114793	0.0143673	-0.176201	2.07762	1.72722e+09	0.530782	6.48913e+10	8.50978e+10
2010-03-22	5.76598	16	126309	389240640	84379	313065420	0.0186876	0.217856	0.169498	0.994196	1	1	0.000114335	0.0143696	-0.175952	2.08677	1.74695e+09	0.530551	6.49344e+10	8.51964e+10
2010-03-23	5.76167	16	126351	389351031	84443	313336534	0.0186326	0.218256	0.170813	0.994234	1	1	0.00011432	0.0144517	-0.175818	2.08559	1.74545e+09	0.531141	6.49503e+10	8.52162e+10
2010-03-24	5.76129	16	126416	389727663	84487	313663518	0.0186185	0.218285	0.167376	0.994102	1	1	0.000114254	0.0144369	-0.175961	2.08478	1.74714e+09	0.531125	6.49628e+10	8.52319e+10
2010-03-25	5.76219	16	126714	391331524	84657	315006173	0.0186051	0.218358	0.1675	0.994136	1	1	0.000114054	0.0144365	-0.176235	2.08407	1.75584e+09	0.531253	6.50052e+10	8.52734e+10
2010-03-26	5.76238	16	127001	392352342	84793	315944124	0.0185456	0.218449	0.164149	0.994094	1	1	0.000113959	0.0144004	-0.176097	2.08631	1.75763e+09	0.531412	6.50151e+10	8.52803e+10
2010-03-27	5.76249	16	126834	391351777	84678	315174884	0.0184651	0.218474	0.170111	0.994175	1	1	0.000114135	0.0143761	-0.176123	2.08624	1.7535e+09	0.531557	6.49984e+10	8.52563e+10
2010-03-28	5.76345	16	126800	391148435	84652	314998562	0.0182986	0.218299	0.173014	0.994207	1	1	0.000114177	0.0143843	-0.175968	2.08757	1.75352e+09	0.531486	6.50056e+10	8.52378e+10
2010-03-29	5.76501	16	127101	393070109	84837	316427702	0.0181026	0.218087	0.171071	0.994155	1	1	0.000113906	0.0143825	-0.176162	2.08695	1.76315e+09	0.531336	6.50223e+10	8.52541e+10
2010-03-30	5.76744	16	127238	394448794	84864	317700836	0.0181753	0.218017	0.171656	0.994164	1	1	0.000113746	0.0143912	-0.176215	2.08976	1.77075e+09	0.531325	6.50782e+10	8.53439e+10
2010-03-31	5.76367	16	127415	394123503	85334	318271736	0.0183111	0.219021	0.171778	0.994203	1	1	0.000113655	0.0141037	-0.176198	2.09402	1.76106e+09	0.531203	6.50782e+10	85330753763
2010-04-01	5.74641	16	127351	393077633	85318	316988596	0.0183024	0.219034	0.171929	0.994209	1	1	0.00011366	0.0136698	-0.175979	2.09286	1.75389e+09	0.532848	6.51065e+10	8.53783e+10
2010-04-02	5.74921	16	128247	392193940	85181	316306848	0.0180193	0.219097	0.172659	0.994271	1	1	0.000113738	0.0137938	-0.176087	2.07226	1.75471e+09	0.53226	6.51241e+10	8.53948e+10
2010-04-03	5.74908	16	128016	390843605	85028	315305515	0.0180049	0.21912	0.171874	0.994234	1	1	0.000113959	0.0138196	-0.175879	2.072	1.74894e+09	0.532392	6.51143e+10	8.53847e+10
2010-04-04	5.74931	16	128006	390792245	85022	315289430	0.0179877	0.219161	0.17233	0.994277	1	1	0.000113949	0.0138218	-0.175908	2.07202	1.74873e+09	0.532281	6.51049e+10	8.53703e+10
2010-04-05	5.75157	16	128137	391683485	85102	316036788	0.0178524	0.219099	0.168752	0.994134	1	1	0.00011383	0.0138925	-0.175684	2.07316	1.7533e+09	0.532006	6.5125e+10	8.53838e+10
2010-04-06	5.7486	16	128256	392286969	85196	316447811	0.0177132	0.219217	0.1687	0.994147	1	1	0.000113743	0.0138957	-0.176222	2.07187	1.75526e+09	0.532423	6.5189e+10	8.54632e+10
2010-04-07	5.74692	16	128266	392373504	85216	316407186	0.0177494	0.219065	0.169637	0.994203	1	1	0.000113743	0.0139243	-0.176369	2.07114	1.75582e+09	0.532749	6.51996e+10	8.54767e+10
2010-04-08	5.74663	16	128413	393294721	85327	317138642	0.0178117	0.21902	0.169697	0.994203	1	1	0.000113595	0.0139368	-0.176417	2.07085	1.75999e+09	0.532779	6.52852e+10	8.55746e+10
2010-04-09	5.74846	16	128472	393621176	85343	317448823	0.0176893	0.219269	0.169697	0.994207	1	1	0.000113588	0.0140823	-0.176147	2.071	1.76195e+09	0.532661	6.53045e+10	8.56041e+10
2010-04-10	5.75136	16	128690	394291586	85409	317946562	0.0175702	0.218824	0.169624	0.994207	1	1	0.000113532	0.0140026	-0.176253	2.078	1.76863e+09	0.532514	6.53106e+10	8.56067e+10
2010-04-11	5.75344	16	129403	393558755	85400	318488902	0.0175281	0.219874	0.169123	0.994206	1	1	0.000113639	0.0139931	-0.176182	2.06038	1.76352e+09	0.532266	6.53001e+10	8.55947e+10
2010-04-12	5.75086	16	129733	395469938	85615	319884756	0.0176024	0.219775	0.167358	0.994423	1	1	0.000113409	0.0140992	-0.176698	2.05936	1.77147e+09	0.532851	6.53589e+10	8.56558e+10
2010-04-13	5.7506	16	129871	396194213	85686	320445409	0.0176141	0.21962	0.168061	0.994442	1	1	0.000113269	0.0140868	-0.176752	2.06115	1.77648e+09	0.532745	6.53918e+10	8.56929e+10
2010-04-14	5.73894	16	129791	395323989	85724	319660728	0.0176025	0.220018	0.167703	0.994436	1	1	0.000113332	0.0141728	-0.176728	2.0512	1.76096e+09	0.533891	6.53951e+10	8.56986e+10
2010-04-15	5.73533	16	130093	397164352	85932	321132521	0.0175574	0.220109	0.167867	0.994436	1	1	0.000113169	0.0142143	-0.176925	2.05002	1.77017e+09	0.534965	6.54841e+10	8.57889e+10
2010-04-16	5.73688	16	129981	396597043	85859	320811538	0.017447	0.220187	0.167718	0.994427	1	1	0.000113289	0.0143257	-0.177567	2.05092	1.76873e+09	0.534972	6.55434e+10	8.58663e+10
2010-04-17	5.73699	16	129900	396132862	85809	320505188	0.0173345	0.220323	0.168366	0.994463	1	1	0.000113352	0.0142553	-0.177516	2.05077	1.76662e+09	0.534935	6.5532e+10	8.58543e+10
2010-04-18	5.7377	16	129914	396114134	85790	320449120	0.0171185	0.220314	0.172284	0.994502	1	1	0.000113371	0.014277	-0.177549	2.05498	1.7679e+09	0.534941	6.56298e+10	8.59534e+10
2010-04-19	5.73781	16	130077	397066169	85925	321191103	0.0172417	0.220169	0.172552	0.994523	1	1	0.000113246	0.0142796	-0.177601	2.05515	1.77197e+09	0.534993	6.56488e+10	8.60202e+10
2010-04-20	5.74005	18	154821	399927120	114106	323853030	0.0172075	0.22033	0.171009	0.99447	1	1	0.000112939	0.0142144	-0.17791	2.21336	1.81844e+09	0.535477	6.58753e+10	8.62541e+10
2010-04-21	5.7363	18	154764	399462885	114068	323269764	0.0174207	0.220227	0.171262	0.99436	1	1	0.000112997	0.014273	-0.178188	2.2114	1.81479e+09	0.535979	6.58794e+10	8.62528e+10
2010-04-22	5.72827	18	154770	399376654	114173	323984272	0.0174411	0.221285	0.173258	0.99435	1	1	0.00011292	0.0142385	-0.178348	2.19857	1.80188e+09	0.536671	6.58805e+10	8.62449e+10
2010-04-23	5.72875	18	154852	399816385	114243	324480730	0.0173998	0.22151	0.175029	0.9944	1	1	0.000112849	0.0141275	-0.178298	2.19859	1.80415e+09	0.536569	6.59176e+10	8.62806e+10
2010-04-24	5.72623	18	154718	399099650	114166	324041987	0.0173935	0.221783	0.17518	0.994425	1	1	0.000112937	0.0141374	-0.178353	2.19489	1.79747e+09	0.536837	6.59147e+10	8.62763e+10
2010-04-25	5.72917	18	154761	399371741	114177	324168154	0.0172865	0.221557	0.175712	0.994428	1	1	0.000112932	0.0141388	-0.178249	2.19941	1.80433e+09	0.53679	6.59148e+10	8.62741e+10
2010-04-26	5.72922	18	155161	401475053	114469	325802889	0.0172314	0.221458	0.176341	0.994461	1	1	0.000112648	0.0141366	-0.178318	2.1974	1.81195e+09	0.536879	6.59563e+10	8.63303e+10
2010-04-27	5.7271	18	155254	401869316	114549	326114980	0.0171939	0.221488	0.177035	0.994476	1	1	0.000112667	0.0144036	-0.178562	2.19685	1.81343e+09	0.537543	6.59735e+10	8.63397e+10
2010-04-28	5.7264	18	155291	402159368	114564	326232760	0.017148	0.221354	0.177193	0.994486	1	1	0.00011265	0.0140937	-0.178586	2.19577	1.814e+09	0.537766	6.59947e+10	8.63597e+10
2010-04-29	5.72516	18	155343	402411656	114598	326322220	0.0171992	0.221175	0.177224	0.994486	1	1	0.000112634	0.0140834	-0.178954	2.19366	1.81429e+09	0.538013	6.60449e+10	8.64115e+10
2010-04-30	5.72487	18	155556	403546432	114767	327383264	0.0171263	0.221302	0.176935	0.994473	1	1	0.000112489	0.0140665	-0.17846	2.19439	1.81982e+09	0.538196	6.6183e+10	8.65677e+10
2010-05-01	5.73783	18	155584	404391404	114724	328258752	0.0171356	0.221117	0.177156	0.99451	1	1	0.000112345	0.0133197	-0.177884	2.19874	1.82528e+09	0.536215	6.63602e+10	8.66795e+10
2010-05-02	5.73793	18	155106	401949840	114393	326572655	0.01699	0.221446	0.176901	0.994504	1	1	0.000112715	0.0133631	-0.177817	2.19807	1.81316e+09	0.536255	6.62998e+10	8.66097e+10
2010-05-03	5.73805	18	155131	402094318	114411	326698088	0.0169285	0.221494	0.176904	0.994506	1	1	0.000112698	0.0133433	-0.177776	2.19799	1.81376e+09	0.536242	6.63018e+10	8.66117e+10
2010-05-04	5.7321	18	155252	402492067	114536	327057006	0.0168893	0.221666	0.176572	0.994511	1	1	0.00011262	0.0134106	-0.177584	2.19711	1.81426e+09	0.536954	6.63336e+10	8.66436e+10
2010-05-05	5.69185	18	151651	383575129	111890	310099388	0.0169089	0.221054	0.17511	0.994488	1	1	0.00011563	0.0136886	-0.168076	2.20146	1.73393e+09	0.544105	6.63641e+10	8.66741e+10
2010-05-06	5.69178	18	151841	384495867	112036	310878270	0.0169098	0.220952	0.174344	0.994478	1	1	0.000115477	0.0136524	-0.168414	2.20261	1.73874e+09	0.544077	6.64333e+10	8.67572e+10
2010-05-07	5.6898	18	151842	384428344	112057	310936313	0.0168945	0.221756	0.175017	0.994482	1	1	0.000115524	0.0137382	-0.168484	2.20164	1.73769e+09	0.544572	6.64225e+10	8.67467e+10
2010-05-08	5.69297	18	151804	384377833	111990	310655846	0.0169048	0.221439	0.172333	0.99433	1	1	0.000115493	0.0137535	-0.168303	2.20323	1.73872e+09	0.543974	6.64278e+10	8.67516e+10
2010-05-09	5.69659	19	152105	384423970	111960	310959324	0.0169027	0.221717	0.172293	0.994335	1	1	0.000115471	0.0135805	-0.16825	2.15148	1.72794e+09	0.543376	6.64205e+10	8.67047e+10
2010-05-10	5.70089	19	152920	388498145	112510	314409440	0.0169151	0.221766	0.172448	0.994351	1	1	0.000114867	0.0135403	-0.168265	2.14603	1.74835e+09	0.542802	6.65181e+10	8.68067e+10
2010-05-11	5.70005	19	152922	388441149	112520	314388848	0.0168659	0.221851	0.17231	0.994388	1	1	0.000114889	0.0135215	-0.168771	2.14457	1.74556e+09	0.542981	6.64865e+10	8.67756e+10
2010-05-12	5.69791	19	153085	389160529	112633	314763290	0.016193	0.221768	0.173122	0.994407	1	1	0.000114816	0.0134997	-0.168794	2.14396	1.74881e+09	0.543459	6.65282e+10	8.68234e+10
2010-05-13	5.69674	19	153096	389214053	112652	314884536	0.0161536	0.221829	0.173463	0.994366	1	1	0.000114821	0.0134713	-0.168846	2.14201	1.74749e+09	0.543664	6.65398e+10	8.68362e+10
2010-05-14	5.69867	19	153141	389545897	112681	315242177	0.0161488	0.221885	0.173437	0.994361	1	1	0.000114791	0.0134647	-0.168676	2.14279	1.74921e+09	0.543513	6.65479e+10	8.68482e+10
2010-05-15	5.70006	19	153373	390774748	112844	316240936	0.0161869	0.221921	0.173479	0.994404	1	1	0.000114612	0.0134474	-0.168446	2.14328	1.75476e+09	0.543297	6.66015e+10	8.69008e+10
2010-05-16	5.69941	19	153200	389862792	112722	315530139	0.0161372	0.222036	0.174727	0.994359	1	1	0.000114698	0.0134664	-0.168557	2.14391	1.75155e+09	0.543151	6.66029e+10	8.68873e+10
2010-05-17	5.69811	19	153418	390907401	112906	316546436	0.0161685	0.222399	0.175462	0.994354	1	1	0.000114548	0.0134757	-0.168508	2.14372	1.75449e+09	0.543352	6.66635e+10	8.69508e+10
2010-05-18	5.69725	19	153681	392184170	113101	317507682	0.0161783	0.222387	0.176167	0.994351	1	1	0.000114397	0.0134333	-0.168478	2.14306	1.75947e+09	0.543694	6.67259e+10	8.70229e+10
2010-05-19	5.69686	19	153731	392358034	113108	317407413	0.0162177	0.222151	0.176534	0.994363	1	1	0.000114433	0.0135062	-0.168971	2.14236	1.7614e+09	0.544036	6.67924e+10	8.70882e+10
2010-05-20	5.68952	19	153951	393055399	113290	317627028	0.0162078	0.22214	0.176175	0.994363	1	1	0.00011438	0.0135309	-0.169187	2.14033	1.76316e+09	0.545367	6.69043e+10	8.72043e+10
2010-05-21	5.68857	19	153942	392990005	113305	317602035	0.0161999	0.222223	0.175766	0.994357	1	1	0.000114373	0.0135297	-0.169151	2.13872	1.76108e+09	0.545418	6.68934e+10	8.71893e+10
2010-05-22	5.68562	19	153875	392452139	113257	316937028	0.016203	0.222076	0.175936	0.994365	1	1	0.000114412	0.0135532	-0.168622	2.13887	1.75889e+09	0.545708	6.68901e+10	8.7186e+10
2010-05-23	5.68793	19	153848	392478023	113236	317138938	0.0162441	0.222221	0.177929	0.994413	1	1	0.000114422	0.0135171	-0.168535	2.13828	1.75822e+09	0.545372	6.69021e+10	8.71979e+10
2010-05-24	5.68428	19	153828	392426232	113261	317444688	0.0162259	0.222589	0.178072	0.994395	1	1	0.000114479	0.0136267	-0.168742	2.13324	1.75605e+09	0.546183	6.69287e+10	8.72296e+10
2010-05-25	5.6833	19	154232	394498851	113594	319480501	0.0162858	0.222947	0.178538	0.994444	1	1	0.000114154	0.0134965	-0.169103	2.13196	1.76349e+09	0.546176	6.73159e+10	8.76216e+10
2010-05-26	5.68209	19	154339	395017701	113686	319982698	0.0163158	0.223025	0.179829	0.994451	1	1	0.000114037	0.0135039	-0.169062	2.13187	1.76627e+09	0.546157	6.73685e+10	8.76779e+10
2010-05-27	5.6818	19	154461	395600447	113778	320435402	0.0162979	0.223036	0.179799	0.994454	1	1	0.000113971	0.0134806	-0.169455	2.13137	1.76786e+09	0.546285	6.74173e+10	8.7735e+10
2010-05-28	5.67594	19	154822	397069719	114092	321712836	0.01633	0.223313	0.179565	0.994474	1	1	0.000113746	0.0135358	-0.169459	2.13036	1.77096e+09	0.547128	6.74875e+10	8.78093e+10
2010-05-29	5.67534	19	154707	396423812	114007	321135064	0.0163608	0.22328	0.17953	0.994464	1	1	0.000113855	0.0135448	-0.169404	2.13007	1.76835e+09	0.547307	6.74698e+10	8.77914e+10
2010-05-30	5.67509	19	154826	397211723	114085	321829702	0.0163618	0.223364	0.179139	0.994471	1	1	0.000113739	0.0135389	-0.169233	2.12959	1.7725e+09	0.547349	6.75208e+10	8.79081e+10
2010-05-31	5.66787	19	154408	394764341	113931	321173839	0.0163678	0.224493	0.179189	0.994478	1	1	0.000114047	0.0133822	-0.169964	2.12156	1.74843e+09	0.548066	6.74514e+10	8.78379e+10
2010-06-01	5.66701	19	155317	399130870	114482	323596692	0.0163867	0.223911	0.173718	0.994432	1	1	0.00011362	0.0133866	-0.169021	2.12601	1.77796e+09	0.549513	6.87241e+10	8.91037e+10
2010-06-02	5.66829	19	154928	397071349	114193	321870072	0.0163897	0.223772	0.174083	0.994437	1	1	0.000113942	0.0134289	-0.168161	2.1285	1.7705e+09	0.549374	6.86901e+10	8.90571e+10
2010-06-03	5.66865	19	155047	397633637	114270	322177974	0.0163204	0.223407	0.173711	0.994454	1	1	0.000113896	0.0134927	-0.168195	2.12983	1.77409e+09	0.549556	6.87105e+10	8.90783e+10
2010-06-04	5.67269	19	155252	398790855	114380	323048266	0.0162994	0.223395	0.175121	0.994448	1	1	0.000113745	0.0135563	-0.1681	2.13246	1.78025e+09	0.549009	6.87417e+10	8.91076e+10
2010-06-05	5.6847	19	155606	401119524	114609	325316448	0.0163223	0.223305	0.175203	0.994444	1	1	0.000113488	0.013589	-0.16814	2.1382	1.79321e+09	0.547735	6.8761e+10	8.91199e+10
2010-06-06	5.68944	19	155624	401116315	114560	324715130	0.016265	0.222762	0.176241	0.99442	1	1	0.000113498	0.0136263	-0.168227	2.14699	1.79892e+09	0.547033	6.87472e+10	8.9106e+10
2010-06-07	5.68604	19	154454	401822384	113293	325112518	0.0162147	0.222693	0.166337	0.994346	1	1	0.000113394	0.0137111	-0.168306	2.12669	1.80115e+09	0.547492	6.86499e+10	8.90102e+10
2010-06-08	5.68264	19	154652	402663539	113456	325734153	0.0161782	0.222695	0.165644	0.994327	1	1	0.000113294	0.013723	-0.168349	2.12598	1.80341e+09	0.548117	6.86901e+10	8.90506e+10
2010-06-09	5.6809	19	154686	402743632	113484	325713944	0.0162397	0.222667	0.166181	0.994369	1	1	0.0001133	0.0137258	-0.168531	2.12536	1.80332e+09	0.548444	6.88218e+10	8.91762e+10
2010-06-10	5.67582	19	155209	405701416	113893	328316118	0.0161753	0.222498	0.165888	0.994334	1	1	0.000112884	0.0137315	-0.168063	2.1244	1.81351e+09	0.549138	6.95012e+10	8.99694e+10
2010-06-11	5.67047	19	155170	405115863	113855	327325988	0.0160932	0.222268	0.166876	0.994339	1	1	0.000112934	0.0137451	-0.168149	2.12261	1.80691e+09	0.549599	6.9493e+10	8.99598e+10
2010-06-12	5.7416	19	158972	429148004	116338	348234476	0.0160725	0.221044	0.169004	0.994388	1	1	0.000109813	0.0133556	-0.177127	2.12862	1.92734e+09	0.54011	6.9532e+10	9e+10
2010-06-13	5.74158	19	159037	429497769	116390	348541946	0.0159897	0.221082	0.166496	0.994301	1	1	0.00010977	0.0133455	-0.177209	2.12816	1.92831e+09	0.540095	6.97115e+10	9.01774e+10
2010-06-14	5.74167	19	159046	429574691	116405	348727457	0.0160172	0.221327	0.167288	0.994324	1	1	0.000109745	0.0132906	-0.177038	2.12842	1.92923e+09	0.540019	6.97097e+10	9.01749e+10
2010-06-15	5.74796	19	159382	430818863	116764	350793558	0.0159656	0.221883	0.167122	0.9943	1	1	0.000109675	0.0134135	-0.176823	2.15572	1.93309e+09	0.539583	6.97543e+10	9.02202e+10
2010-06-16	5.74502	19	158911	428210235	116442	348814140	0.0159951	0.222024	0.16753	0.994305	1	1	0.000109971	0.0134306	-0.177059	2.15332	1.91737e+09	0.539729	6.96742e+10	9.01327e+10
2010-06-17	5.74835	19	159212	430004273	116663	350545746	0.0159872	0.222347	0.167478	0.994309	1	1	0.000109697	0.0134102	-0.176778	2.15313	1.92411e+09	0.538982	6.96925e+10	9.01498e+10
2010-06-18	5.74167	19	159433	430980581	116834	351060074	0.0159686	0.222461	0.167912	0.9943	1	1	0.000109581	0.0133285	-0.177287	2.14751	1.92524e+09	0.539928	6.97192e+10	9.01794e+10
2010-06-19	5.7425	19	159411	430902134	116819	351047827	0.0159152	0.222402	0.169306	0.994333	1	1	0.000109563	0.0132408	-0.177243	2.14787	1.92498e+09	0.539676	6.97277e+10	9.01875e+10
2010-06-20	5.74068	19	159620	431962183	116982	351907118	0.0159192	0.222628	0.169882	0.994343	1	1	0.000109432	0.0130722	-0.177333	2.14521	1.9274e+09	0.53993	6.9775e+10	9.02278e+10
2010-06-21	5.73745	19	159535	431367079	116939	351428373	0.0159309	0.222611	0.170065	0.994333	1	1	0.000109555	0.0131834	-0.177374	2.14306	1.92251e+09	0.540588	6.98448e+10	9.02963e+10
2010-06-22	5.73727	19	159710	432409182	117055	352101362	0.0160538	0.222171	0.17149	0.994411	1	1	0.00010942	0.0131654	-0.177313	2.14335	1.93082e+09	0.540646	6.99355e+10	9.039e+10
2010-06-23	5.73529	19	159646	431908525	117025	351652487	0.0159835	0.222207	0.171269	0.994381	1	1	0.000109503	0.0132702	-0.177746	2.14403	1.92813e+09	0.540976	6.99654e+10	9.042e+10
2010-06-24	5.73449	19	159703	432199667	117067	351903336	0.0159915	0.222273	0.172026	0.994394	1	1	0.00010946	0.0132627	-0.177585	2.14339	1.92899e+09	0.54105	6.99844e+10	9.04391e+10
2010-06-25	5.73305	19	160006	433852696	117345	353870597	0.0160185	0.223242	0.170872	0.99444	1	1	0.000109253	0.013248	-0.177216	2.14396	1.93699e+09	0.541355	7.00357e+10	9.04869e+10
2010-06-26	5.73237	19	159919	433378738	117289	353554478	0.0160127	0.223415	0.171382	0.994423	1	1	0.000109287	0.0132133	-0.177106	2.14395	1.93472e+09	0.541308	7.00209e+10	9.04706e+10
2010-06-27	5.7312	19	159715	432233262	117212	353449350	0.0160176	0.224172	0.171968	0.994425	1	1	0.000109435	0.0132334	-0.176828	2.14351	1.92806e+09	0.541574	7.00131e+10	9.04353e+10
2010-06-28	5.72639	19	160130	434124046	117506	354421814	0.016074	0.22381	0.173449	0.994446	1	1	0.00010917	0.0131871	-0.176549	2.14274	1.93827e+09	0.542296	7.00586e+10	9.04842e+10
2010-06-29	5.72643	19	160389	435679879	117686	355665614	0.0161244	0.223877	0.170394	0.994475	1	1	0.000108978	0.0131744	-0.176532	2.13953	1.94492e+09	0.542319	7.00908e+10	9.05136e+10
2010-06-30	5.72194	19	160716	437175272	117962	356778328	0.0160818	0.223743	0.165379	0.994459	1	1	0.000108913	0.0130803	-0.176024	2.1402	1.95038e+09	0.543641	7.02989e+10	9.07206e+10
2010-07-01	5.73713	18	148073	432046888	104420	350358269	0.0160719	0.221222	0.165462	0.99446	1	1	0.000109516	0.0131652	-0.17706	2.07852	1.93706e+09	0.540815	6.80808e+10	8.77521e+10
2010-07-02	5.72033	18	147135	425951057	103797	344972362	0.0160689	0.221414	0.165841	0.994471	1	1	0.000110207	0.013215	-0.17748	2.06594	1.89754e+09	0.54258	6.80395e+10	8.76921e+10
2010-07-03	5.72023	18	147049	425455219	103733	344564180	0.0161254	0.221417	0.170316	0.994511	1	1	0.000110253	0.0132244	-0.177491	2.06613	1.89551e+09	0.542503	6.80997e+10	8.77526e+10
2010-07-04	5.72048	18	147086	425683286	103758	344749372	0.0160411	0.2214	0.170835	0.994469	1	1	0.000110206	0.013207	-0.177661	2.06571	1.89599e+09	0.542349	6.79286e+10	87575907843
2010-07-05	5.72661	18	147556	428728438	104056	347492138	0.0160392	0.22154	0.171148	0.99449	1	1	0.000109861	0.0132483	-0.177232	2.06707	1.9104e+09	0.541763	6.80317e+10	8.76778e+10
2010-07-06	5.72684	18	147721	429727236	104169	348269246	0.0160062	0.221585	0.170203	0.994456	1	1	0.000109743	0.013225	-0.177134	2.06656	1.91543e+09	0.541735	6.80412e+10	8.76883e+10
2010-07-07	5.72121	18	147754	429935653	104191	348163426	0.0160299	0.22161	0.170214	0.994438	1	1	0.000109702	0.0133195	-0.177105	2.05887	1.91497e+09	0.542441	6.8108e+10	8.78516e+10
2010-07-08	5.71801	18	147834	430326077	104302	348887626	0.01602	0.221997	0.169773	0.994425	1	1	0.000109594	0.0132081	-0.17681	2.05739	1.91529e+09	0.542616	6.81211e+10	8.78716e+10
2010-07-09	5.71929	18	147934	430984108	104372	349513959	0.0159963	0.221999	0.168597	0.994429	1	1	0.000109524	0.0131732	-0.176824	2.05781	1.91816e+09	0.542509	6.81246e+10	8.78886e+10
2010-07-10	5.71778	18	147994	431291628	104433	349853987	0.0159993	0.222177	0.169495	0.994497	1	1	0.00010947	0.0131094	-0.176527	2.05723	1.91888e+09	0.542629	6.81648e+10	8.79337e+10
2010-07-11	5.71858	18	147882	430719854	104353	349478894	0.0160162	0.222248	0.168768	0.994528	1	1	0.000109518	0.0131166	-0.176421	2.05692	1.91628e+09	0.54237	6.81429e+10	8.79048e+10
2010-07-12	5.71742	18	148218	432599651	104586	350791172	0.0160344	0.222134	0.169498	0.994548	1	1	0.000109278	0.0133252	-0.17653	2.05515	1.92441e+09	0.542561	6.81884e+10	8.79525e+10
2010-07-13	5.71746	18	148441	434010226	104767	352406362	0.0161138	0.22289	0.16354	0.994457	1	1	0.000109114	0.0134229	-0.176297	2.05492	1.93203e+09	0.542662	6.8234e+10	8.79982e+10
2010-07-14	5.71531	18	148458	434199689	104807	352613044	0.0160373	0.223004	0.164853	0.994418	1	1	0.000109078	0.0134216	-0.176513	2.05088	1.93194e+09	0.542919	6.82324e+10	8.79955e+10
2010-07-15	5.71228	18	149039	437285336	105243	354936916	0.0160815	0.222959	0.165188	0.994448	1	1	0.000108656	0.0134358	-0.175834	2.05225	1.94338e+09	0.543149	6.84025e+10	8.81681e+10
2010-07-16	5.71043	18	148968	437002488	105308	355308876	0.0160766	0.223613	0.165196	0.994447	1	1	0.000108659	0.0136274	-0.17629	2.04605	1.93719e+09	0.543314	6.84302e+10	8.81939e+10
2010-07-17	5.714	18	148880	436780297	105249	355504189	0.0161424	0.223867	0.165685	0.994496	1	1	0.00010871	0.0134303	-0.177234	2.04616	1.93615e+09	0.542813	6.84147e+10	8.81747e+10
2010-07-18	5.71173	18	148824	436324354	105229	355217248	0.0162299	0.22386	0.165879	0.994543	1	1	0.000108767	0.0134411	-0.177431	2.04595	1.93153e+09	0.543129	6.84202e+10	8.81756e+10
2010-07-19	5.71077	18	148940	436957829	105307	355644984	0.0161307	0.223788	0.164633	0.994508	1	1	0.000108683	0.0134801	-0.177757	2.04459	1.93291e+09	0.5432	6.85669e+10	8.83222e+10
2010-07-20	5.71027	18	149436	439749253	105656	357826943	0.0161425	0.223794	0.164588	0.994508	1	1	0.00010834	0.0134243	-0.177934	2.04507	1.94533e+09	0.543311	6.86328e+10	8.83902e+10
2010-07-21	5.71117	18	149480	439960258	105696	358065583	0.0161573	0.223783	0.168412	0.994523	1	1	0.000108254	0.0134059	-0.178018	2.04446	1.94601e+09	0.542842	6.86425e+10	8.84032e+10
2010-07-22	5.71078	18	149471	439930461	105689	358080467	0.0161445	0.224025	0.168012	0.994506	1	1	0.000108247	0.0133253	-0.178119	2.04402	1.94623e+09	0.542856	6.86508e+10	8.8412e+10
2010-07-23	5.70681	18	148770	439766123	105706	357742211	0.0161513	0.223992	0.166206	0.994536	1	1	0.000108284	0.0133236	-0.178248	2.08912	1.94374e+09	0.543511	6.87832e+10	8.85487e+10
2010-07-24	5.70616	18	148659	439078595	105631	357192032	0.0161357	0.224042	0.167848	0.994535	1	1	0.000108389	0.0133332	-0.17811	2.08902	1.94044e+09	0.543696	6.87649e+10	8.85267e+10
2010-07-25	5.70506	18	148654	438994298	105632	357110280	0.0160571	0.224085	0.167984	0.994489	1	1	0.000108421	0.0133144	-0.178225	2.08837	1.93973e+09	0.543977	6.87703e+10	8.85277e+10
2010-07-26	5.70463	18	148871	440236115	105790	358055454	0.0161013	0.224143	0.168302	0.994508	1	1	0.000108276	0.013539	-0.17837	2.08833	1.94543e+09	0.544053	6.881e+10	8.85772e+10
2010-07-27	5.70471	18	148982	440879821	105869	358579002	0.0160608	0.22415	0.167241	0.994487	1	1	0.00010819	0.0135619	-0.178515	2.08818	1.94843e+09	0.544031	6.88266e+10	8.85915e+10
2010-07-28	5.70273	18	149105	441436038	105956	358835131	0.0160875	0.224045	0.170983	0.994519	1	1	0.000108146	0.0133763	-0.178638	2.08766	1.95088e+09	0.544447	6.88487e+10	8.86218e+10
2010-07-29	5.70211	18	149065	441175327	105951	358838134	0.0159211	0.224284	0.170469	0.994424	1	1	0.000108217	0.0133715	-0.178622	2.08732	1.94609e+09	0.544698	6.88905e+10	8.86535e+10
2010-07-30	5.69976	18	149163	441632216	106040	359223777	0.0159065	0.22457	0.169885	0.994428	1	1	0.00010819	0.0134069	-0.178233	2.08539	1.94668e+09	0.545192	6.89326e+10	8.87004e+10
2010-07-31	5.7013	18	148868	439907899	105821	357863453	0.0159065	0.224489	0.168115	0.994444	1	1	0.000108365	0.0135247	-0.178399	2.084	1.93686e+09	0.544624	6.87803e+10	8.85441e+10
2010-08-01	5.7068	18	149380	443315277	106171	360620019	0.0159319	0.224229	0.172068	0.994468	1	1	0.000108047	0.0133573	-0.178807	2.08666	1.95607e+09	0.544488	6.88871e+10	8.86119e+10
2010-08-02	5.69741	18	149260	442514282	106154	360231844	0.0159933	0.224592	0.171741	0.994524	1	1	0.000108078	0.01331	-0.179043	2.0758	1.94029e+09	0.545397	6.90059e+10	8.87269e+10
2010-08-03	5.69347	18	149189	441853448	106105	359407258	0.0159175	0.224487	0.172236	0.994484	1	1	0.000108171	0.0133578	-0.179333	2.07504	1.93758e+09	0.546036	6.9005e+10	8.87261e+10
2010-08-04	5.69372	18	149248	442227566	106148	359758124	0.0159155	0.224476	0.171894	0.994488	1	1	0.000108123	0.0133063	-0.179335	2.07474	1.93904e+09	0.546002	6.90216e+10	8.87644e+10
2010-08-05	5.69425	18	149573	444045174	106377	361154460	0.0159086	0.224548	0.172063	0.994498	1	1	0.000107908	0.0132747	-0.179045	2.07653	1.94698e+09	0.546001	6.90807e+10	8.88248e+10
2010-08-06	5.69661	18	149915	446080536	106614	362801602	0.0158773	0.224463	0.172461	0.994492	1	1	0.000107665	0.0133045	-0.179407	2.07829	1.95616e+09	0.545649	6.91279e+10	8.88744e+10
2010-08-07	5.69661	18	149805	445439725	106535	362263336	0.0159028	0.224404	0.176455	0.994482	1	1	0.000107756	0.0133141	-0.179242	2.07839	1.95363e+09	0.545736	6.91432e+10	8.88897e+10
2010-08-08	5.69574	18	149789	445300042	106524	362088764	0.015854	0.224414	0.174388	0.994494	1	1	0.00010776	0.0133182	-0.17937	2.07852	1.95314e+09	0.54579	6.91275e+10	8.88675e+10
2010-08-09	5.69601	18	149914	446105190	106603	362658420	0.0158707	0.224319	0.175097	0.994506	1	1	0.000107673	0.0134025	-0.17904	2.07871	1.95763e+09	0.545807	6.91357e+10	8.88784e+10
2010-08-10	5.69287	18	150337	448427840	106911	364362184	0.0158256	0.22427	0.174457	0.994487	1	1	0.000107367	0.0134425	-0.179044	2.07797	1.96833e+09	0.546201	6.92178e+10	8.89658e+10
2010-08-11	5.69384	18	150272	448075354	106892	364589234	0.0160597	0.22462	0.175028	0.994601	1	1	0.000107445	0.0134471	-0.179134	2.0797	1.96603e+09	0.546263	6.90786e+10	8.88318e+10
2010-08-12	5.6856	17	149677	447712512	106937	364170974	0.0161683	0.224659	0.176045	0.994729	1	1	0.000107503	0.0134742	-0.179529	2.0628	1.95844e+09	0.547471	6.9056e+10	8.88119e+10
2010-08-13	5.68562	17	149629	447428258	106880	363658876	0.0161937	0.224525	0.173178	0.99477	1	1	0.000107533	0.0134502	-0.179703	2.06316	1.96099e+09	0.547463	6.90519e+10	8.88116e+10
2010-08-14	5.68597	17	149531	446885599	106810	363263342	0.0161583	0.224551	0.173428	0.994764	1	1	0.000107588	0.0135129	-0.179738	2.06307	1.95833e+09	0.54736	6.8994e+10	8.87318e+10
2010-08-15	5.6837	17	149602	447063776	106900	363658996	0.0161613	0.224821	0.173101	0.994778	1	1	0.00010761	0.0138744	-0.179224	2.06453	1.95921e+09	0.548016	6.90329e+10	8.87615e+10
2010-08-16	5.68355	17	149764	448336107	107062	364688742	0.0161871	0.225133	0.172661	0.994784	1	1	0.000107486	0.0138254	-0.178937	2.06497	1.96518e+09	0.548196	6.91562e+10	8.88937e+10
2010-08-17	5.68255	17	149869	448899568	107139	365082536	0.0160761	0.225095	0.172304	0.994724	1	1	0.000107408	0.0138229	-0.179077	2.06474	1.96732e+09	0.5483	6.91979e+10	8.8934e+10
2010-08-18	5.67992	17	149946	449263289	107208	365370314	0.0160703	0.225177	0.17251	0.994744	1	1	0.000107379	0.0138249	-0.179085	2.06321	1.9675e+09	0.548747	6.9241e+10	8.8976e+10
2010-08-19	5.6757	17	149997	449215285	107233	364777622	0.0160088	0.224873	0.131918	0.994733	1	1	0.00010733	0.0138216	-0.179202	2.0641	1.96903e+09	0.549144	6.92806e+10	8.90094e+10
2010-08-20	5.67818	17	150379	451055967	107438	366122124	0.016001	0.224997	0.131868	0.994732	1	1	0.000107247	0.0137706	-0.179145	2.06484	1.98252e+09	0.549613	6.93775e+10	8.91105e+10
2010-08-21	5.67685	17	150137	449663414	107276	365109374	0.0160138	0.225141	0.131268	0.994734	1	1	0.00010739	0.013676	-0.179019	2.06287	1.97473e+09	0.549672	7.02006e+10	9.05858e+10
2010-08-22	5.67927	17	150178	449997635	107296	365428563	0.0160286	0.225115	0.130845	0.994712	1	1	0.000107343	0.0136885	-0.179083	2.06483	1.97795e+09	0.549323	7.02206e+10	9.06039e+10
2010-08-23	5.6791	17	150397	451272350	107457	366482453	0.0160851	0.225125	0.131708	0.994783	1	1	0.000107175	0.0136875	-0.179068	2.06462	1.98342e+09	0.549222	7.0272e+10	9.06568e+10
2010-08-24	5.67854	17	150471	451728895	107515	366908686	0.0159487	0.22519	0.131509	0.994736	1	1	0.000107106	0.0136932	-0.179083	2.06318	1.98484e+09	0.54922	7.02705e+10	9.0656e+10
2010-08-25	5.68283	17	150825	454007266	107753	368850600	0.0159645	0.224475	0.13084	0.994757	1	1	0.000106831	0.0136843	-0.179049	2.06419	1.99642e+09	0.548562	7.03338e+10	90727167775
2010-08-26	5.67897	17	150866	454489438	107850	369143340	0.0158263	0.22443	0.128918	0.9947	1	1	0.000106707	0.0136337	-0.179209	2.0635	1.99321e+09	0.54867	7.0384e+10	9.0777e+10
2010-08-27	5.67733	17	150935	454788714	107900	369245382	0.0158166	0.22418	0.12896	0.994704	1	1	0.000106656	0.0136348	-0.179054	2.0629	1.99408e+09	0.548872	7.0427e+10	9.08274e+10
2010-08-28	5.67222	17	150901	454236059	107900	368655750	0.0158185	0.224228	0.129315	0.994718	1	1	0.000106671	0.0136338	-0.179301	2.06061	1.98865e+09	0.54933	7.04229e+10	9.08234e+10
2010-08-29	5.67322	17	150972	454747395	107957	369245236	0.0157823	0.224358	0.129488	0.99471	1	1	0.000106583	0.0136596	-0.179202	2.06012	1.99078e+09	0.549058	7.04311e+10	9.0831e+10
2010-08-30	5.67107	17	151280	456371954	108168	370184353	0.0158048	0.224013	0.129591	0.994708	1	1	0.000106393	0.0136161	-0.179352	2.06055	1.99817e+09	0.549405	7.05512e+10	9.09633e+10
2010-08-31	5.67331	17	151043	455041617	107991	369308364	0.0158156	0.224162	0.129621	0.994726	1	1	0.00010654	0.0136481	-0.179954	2.06217	1.99217e+09	0.549051	7.04336e+10	9.08366e+10
2010-09-01	5.67009	17	151760	459463398	108483	372575931	0.0157435	0.224077	0.130217	0.994669	1	1	0.000105992	0.0135871	-0.180343	2.06709	2.01269e+09	0.549372	7.07762e+10	9.13121e+10
2010-09-02	5.67074	17	151293	456705051	108115	369989430	0.0157692	0.223992	0.13269	0.994637	1	1	0.000106235	0.0135057	-0.180378	2.06826	2.00245e+09	0.548841	7.07456e+10	9.12669e+10
2010-09-03	5.66761	17	151507	458036820	108292	370999032	0.0156415	0.224029	0.131368	0.994576	1	1	0.000106071	0.0135325	-0.180562	2.06683	2.00668e+09	0.549277	7.09882e+10	9.152e+10
2010-09-04	5.66825	17	151440	457655764	108233	370595816	0.0155988	0.223914	0.130752	0.994528	1	1	0.000106116	0.0136307	-0.180827	2.06737	2.00528e+09	0.549157	7.09889e+10	9.15208e+10
2010-09-05	5.66464	17	151425	457220267	108220	369835962	0.0154491	0.223773	0.129717	0.994508	1	1	0.000106137	0.0135251	-0.180636	2.06737	2.00322e+09	0.549679	7.10212e+10	9.15555e+10
2010-09-06	5.6625	17	151505	457767662	108265	370044356	0.0154023	0.223911	0.129914	0.994517	1	1	0.000106125	0.0134904	-0.180678	2.06729	2.0053e+09	0.550306	7.10961e+10	9.16305e+10
2010-09-07	5.66051	17	151579	458110582	108327	370277234	0.0153592	0.223923	0.130133	0.99454	1	1	0.000106113	0.0135712	-0.180915	2.06722	2.00671e+09	0.550784	7.11159e+10	9.16554e+10
2010-09-08	5.65953	17	151686	458680043	108387	370418830	0.0152092	0.223633	0.129773	0.99449	1	1	0.000106055	0.0136712	-0.181338	2.06662	2.00939e+09	0.550977	7.11053e+10	9.16409e+10
2010-09-09	5.66048	17	151706	458756597	108401	370495546	0.0151144	0.223593	0.129253	0.994514	1	1	0.000106074	0.0136696	-0.181181	2.06659	2.00962e+09	0.550915	7.1112e+10	9.16538e+10
2010-09-10	5.65746	17	152059	460820043	108702	372532806	0.0151154	0.223952	0.129363	0.994513	1	1	0.000105819	0.0136795	-0.18063	2.06449	2.01773e+09	0.551354	7.13307e+10	9.19059e+10
2010-09-11	5.65663	17	151799	459237517	108522	371290614	0.0150504	0.22399	0.128967	0.994558	1	1	0.000105953	0.0135972	-0.180605	2.0636	2.00995e+09	0.551186	7.13105e+10	9.18819e+10
2010-09-12	5.65451	17	151679	458416479	108451	370658964	0.0149786	0.224047	0.128446	0.99482	1	1	0.000106059	0.0136803	-0.180821	2.06264	2.00541e+09	0.551549	7.13091e+10	9.18796e+10
2010-09-13	5.65172	17	151770	458766442	108509	370608018	0.0149723	0.223935	0.128278	0.994782	1	1	0.000106025	0.0137629	-0.18103	2.06215	2.00732e+09	0.552006	7.13433e+10	9.19139e+10
2010-09-14	5.65316	17	151829	459027158	108564	370992628	0.0150414	0.223945	0.128046	0.994735	1	1	0.000106028	0.0137878	-0.181007	2.06742	2.00867e+09	0.551988	7.13563e+10	9.19269e+10
2010-09-15	5.64953	17	152170	460895072	108818	372354856	0.0150239	0.223989	0.126165	0.994741	1	1	0.000105819	0.0137501	-0.181165	2.06679	2.01661e+09	0.552632	7.1441e+10	9.20267e+10
2010-09-16	5.64897	17	152128	460633079	108801	372279181	0.0150144	0.224078	0.126407	0.994651	1	1	0.000105832	0.01377	-0.181592	2.06487	2.01316e+09	0.55257	7.14237e+10	9.19969e+10
2010-09-17	5.64835	17	152220	461231617	108832	372066974	0.0149975	0.223496	0.126158	0.99464	1	1	0.000105769	0.0137885	-0.181901	2.06647	2.0119e+09	0.552628	7.18663e+10	9.26917e+10
2010-09-18	5.64752	17	152208	461091724	108850	372213625	0.0150734	0.223734	0.12806	0.994634	1	1	0.000105779	0.0137926	-0.181782	2.06577	2.00964e+09	0.552704	7.18766e+10	9.2702e+10
2010-09-19	5.64777	17	152211	461112534	108851	372242466	0.0150942	0.223713	0.128442	0.994618	1	1	0.000105791	0.0137465	-0.182045	2.06576	2.00967e+09	0.552761	7.18619e+10	9.26873e+10
2010-09-20	5.63439	17	152652	463627068	109277	373798247	0.0151084	0.223783	0.128884	0.994628	1	1	0.000105503	0.0137563	-0.182163	2.06086	2.07968e+09	0.554756	7.19901e+10	9.28609e+10
2010-09-21	5.63457	17	152489	462702532	109153	373009832	0.0150769	0.223704	0.129601	0.994608	1	1	0.000105656	0.0137962	-0.182308	2.06095	2.07546e+09	0.55498	7.19203e+10	9.27934e+10
2010-09-22	5.62954	17	152286	461136272	109018	371437344	0.0150883	0.223549	0.130781	0.99461	1	1	0.000105823	0.013997	-0.182173	2.06046	2.06697e+09	0.555664	7.19184e+10	9.27899e+10
2010-09-23	5.6307	17	152276	461086825	109002	371347730	0.0150959	0.22349	0.13115	0.994614	1	1	0.000105801	0.0140395	-0.18211	2.06169	2.06653e+09	0.555358	7.18671e+10	9.27384e+10
2010-09-24	5.63137	17	152029	459629368	108833	370333262	0.0150883	0.22361	0.130059	0.994579	1	1	0.000106002	0.014076	-0.182148	2.06254	2.06009e+09	0.55544	7.1872e+10	9.2743e+10
2010-09-25	5.63041	17	152148	460270738	108915	370713263	0.0150747	0.223594	0.129785	0.994582	1	1	0.00010594	0.0140582	-0.182166	2.06222	2.06312e+09	0.555681	7.19128e+10	9.28487e+10
2010-09-26	5.63105	17	152319	461331951	109031	371568051	0.0150152	0.223587	0.129941	0.994605	1	1	0.000105788	0.0140454	-0.182436	2.06194	2.06741e+09	0.555452	7.19171e+10	9.25219e+10
2010-09-27	5.62828	17	152354	461393119	109077	371659038	0.0150532	0.223713	0.128964	0.994587	1	1	0.000105807	0.0140916	-0.182643	2.0615	2.0679e+09	0.556049	7.19364e+10	9.2557e+10
2010-09-28	5.62709	17	152466	462016530	109163	372142270	0.0149845	0.22369	0.130526	0.994666	1	1	0.000105758	0.0142011	-0.18254	2.06073	2.07014e+09	0.556366	7.2016e+10	9.2623e+10
2010-09-29	5.6239	17	152488	461970224	109198	371997368	0.0150056	0.223724	0.130951	0.994659	1	1	0.000105733	0.0138964	-0.182933	2.05974	2.06934e+09	0.556695	7.19999e+10	9.25874e+10
2010-09-30	5.619	17	152742	463297912	109367	372874468	0.014997	0.223559	0.130837	0.994654	1	1	0.000105623	0.0138446	-0.182855	2.0567	2.07226e+09	0.55764	7.21472e+10	9.28925e+10
2010-10-01	5.63761	18	152782	461652418	108952	370636004	0.0150453	0.221728	0.130454	0.994654	1	1	0.000105838	0.01327	-0.183554	2.04445	2.02347e+09	0.555089	7.24847e+10	9.3202e+10
2010-10-02	5.6406	18	152586	460671143	108797	369931603	0.01503	0.221775	0.130436	0.994642	1	1	0.000105948	0.0132376	-0.183264	2.04527	2.02038e+09	0.554618	7.24324e+10	93149627726
2010-10-03	5.64008	18	152632	460916958	108830	370084456	0.0150114	0.221786	0.1297	0.994663	1	1	0.000105912	0.0132334	-0.183374	2.04463	2.02082e+09	0.554638	7.2437e+10	93154251566
2010-10-04	5.63983	18	152605	460752530	108812	369956959	0.0150296	0.221845	0.138031	0.994678	1	1	0.000105939	0.0132429	-0.183409	2.04461	2.02023e+09	0.554734	7.24368e+10	9.31541e+10
2010-10-05	5.64067	18	152674	461253600	108863	370380492	0.0150681	0.221818	0.139813	0.99465	1	1	0.000105883	0.0132222	-0.183442	2.04468	2.02311e+09	0.55463	7.2446e+10	9.31634e+10
2010-10-06	5.641	18	152663	461208730	108852	370333924	0.0151087	0.221803	0.140172	0.99465	1	1	0.000105893	0.0132233	-0.183407	2.04468	2.02305e+09	0.554611	7.24589e+10	9.31763e+10
2010-10-07	5.6411	18	152651	461144328	108841	370261079	0.0151	0.22178	0.139954	0.994655	1	1	0.000105897	0.0132001	-0.183437	2.04493	2.02295e+09	0.554587	7.24634e+10	9.31808e+10
2010-10-08	5.63969	18	153100	463773752	109166	372327604	0.0151593	0.221757	0.140897	0.994635	1	1	0.000105575	0.0133681	-0.18322	2.0444	2.03495e+09	0.554646	7.26954e+10	9.34133e+10
2010-10-09	5.64093	18	153323	465106342	109314	373332196	0.0151661	0.221675	0.141589	0.994608	1	1	0.000105429	0.0133339	-0.183357	2.04642	2.04316e+09	0.554534	7.27188e+10	9.34369e+10
2010-10-10	5.64433	18	153945	465821351	109385	374078046	0.0151895	0.221945	0.141471	0.994581	1	1	0.000105361	0.0133211	-0.182987	2.01239	2.05091e+09	0.554165	7.2764e+10	9.34711e+10
2010-10-11	5.64646	18	154061	466578166	109471	374884532	0.0151788	0.222071	0.140954	0.994597	1	1	0.000105296	0.0134162	-0.182916	2.01375	2.05629e+09	0.553997	7.27781e+10	9.34817e+10
2010-10-12	5.64358	18	154051	466267432	109478	374550734	0.015248	0.222163	0.139762	0.994758	1	1	0.000105385	0.0135598	-0.183076	2.01356	2.0535e+09	0.554728	7.2767e+10	9.3469e+10
2010-10-13	5.64168	18	153956	465602843	109419	373975078	0.0153033	0.222111	0.141141	0.994767	1	1	0.000105476	0.0135512	-0.183065	2.0126	2.04999e+09	0.555075	7.27532e+10	9.34543e+10
2010-10-14	5.64122	18	153938	465492343	109409	373900225	0.0153111	0.222027	0.140756	0.994734	1	1	0.000105492	0.0135565	-0.183189	2.01251	2.04944e+09	0.555159	7.27685e+10	9.34322e+10
2010-10-15	5.63471	18	154317	467420068	109717	375379663	0.0152954	0.222272	0.140842	0.994738	1	1	0.000105358	0.0136554	-0.182901	2.01135	2.05426e+09	0.55663	7.29668e+10	9.36432e+10
2010-10-16	5.63584	18	154012	465772482	109504	374271156	0.015326	0.222404	0.140873	0.994796	1	1	0.000105534	0.0136856	-0.183223	2.01076	2.04598e+09	0.556352	7.29637e+10	9.36395e+10
2010-10-17	5.63674	18	154009	465774908	109505	374370776	0.0153982	0.222771	0.141026	0.994796	1	1	0.00010552	0.0135055	-0.183295	2.01078	2.04586e+09	0.55616	7.29378e+10	9.36154e+10
2010-10-18	5.6315	18	154160	466500862	109606	374884676	0.0155449	0.222811	0.142251	0.994794	1	1	0.000105433	0.0135649	-0.183337	2.00672	2.04597e+09	0.556886	7.30234e+10	9.37023e+10
2010-10-19	5.63029	18	154188	466545921	109717	375956618	0.0155165	0.224409	0.142561	0.994735	1	1	0.000105442	0.0135254	-0.182885	2.00692	2.05495e+09	0.557203	7.30262e+10	9.36917e+10
2010-10-20	5.62602	18	154508	468511878	109944	377897118	0.0155296	0.224887	0.142872	0.994737	1	1	0.00010528	0.0135634	-0.181973	2.00688	2.06341e+09	0.558233	7.35571e+10	9.49296e+10
2010-10-21	5.63049	18	154583	469102821	109965	378355221	0.0155236	0.224682	0.142372	0.994777	1	1	0.000105225	0.0136163	-0.182	2.00456	2.06777e+09	0.557654	7.34984e+10	9.48525e+10
2010-10-22	5.62765	18	154585	468938167	109978	378124554	0.0155851	0.224611	0.142663	0.994785	1	1	0.000105335	0.0136259	-0.182018	2.00411	2.06554e+09	0.55856	7.357e+10	9.49268e+10
2010-10-23	5.62741	18	154438	468047023	109875	377417176	0.015592	0.224248	0.142236	0.994842	1	1	0.000105441	0.0136387	-0.181917	2.00464	2.06241e+09	0.558637	7.3593e+10	9.49436e+10
2010-10-24	5.62602	18	154322	467350861	109794	376848302	0.0155618	0.2243	0.142092	0.99483	1	1	0.000105524	0.0136506	-0.181774	2.00348	2.05907e+09	0.558863	7.35801e+10	9.49243e+10
2010-10-25	5.62496	18	154617	469004854	110017	378174894	0.01558	0.224299	0.142533	0.994837	1	1	0.000105378	0.013769	-0.181827	2.0043	2.06569e+09	0.559228	7.3651e+10	9.50024e+10
2010-10-26	5.62374	18	154681	469338834	110073	378479388	0.0155576	0.224295	0.142449	0.994842	1	1	0.000105328	0.0137128	-0.182035	2.00381	2.06557e+09	0.559316	7.36526e+10	9.50098e+10
2010-10-27	5.62085	18	154649	468952339	110049	377909378	0.0155839	0.224165	0.142826	0.99476	1	1	0.000105384	0.013736	-0.18179	2.00341	2.06391e+09	0.559845	7.36862e+10	9.5043e+10
2010-10-28	5.61782	18	154626	468627476	110044	377561342	0.0156185	0.224171	0.14255	0.994782	1	1	0.000105533	0.0137642	-0.181664	2.0039	2.06207e+09	0.560943	7.37343e+10	9.50902e+10
2010-10-29	5.61364	18	154428	467191683	109911	376113826	0.0154438	0.224227	0.142362	0.994779	1	1	0.00010573	0.0138933	-0.181951	2.00345	2.05635e+09	0.561802	7.37767e+10	9.51469e+10
2010-10-30	5.61272	18	154475	467404376	109948	376249978	0.0154538	0.224255	0.142581	0.994783	1	1	0.000105683	0.0138836	-0.181812	2.00284	2.05695e+09	0.561824	7.37681e+10	9.51229e+10
2010-10-31	5.61148	16	146500	464553406	100510	373839744	0.0154659	0.224171	0.141623	0.994719	1	1	0.000105963	0.0138852	-0.181965	2.03384	2.07977e+09	0.561661	7.36368e+10	9.49388e+10
2010-11-01	5.61298	16	147268	469964700	101026	377345307	0.0154942	0.22305	0.141773	0.994686	1	1	0.000105476	0.013721	-0.18231	2.02873	2.10328e+09	0.562267	7.38089e+10	9.51487e+10
2010-11-02	5.62454	17	148921	470714335	100894	377176614	0.0155778	0.222774	0.142285	0.994673	1	1	0.000105405	0.0136609	-0.182222	2.01244	2.09062e+09	0.560747	7.3387e+10	9.45232e+10
2010-11-03	5.6197	17	148926	470455045	100919	376661390	0.015396	0.222735	0.142316	0.994597	1	1	0.000105379	0.0136482	-0.181767	2.01015	2.08811e+09	0.561258	7.33917e+10	9.45289e+10
2010-11-04	5.61752	17	148859	469909522	100877	376124679	0.0154616	0.22272	0.143001	0.994577	1	1	0.00010546	0.0136943	-0.181988	2.00936	2.08489e+09	0.561721	7.35828e+10	9.46891e+10
2010-11-05	5.61558	17	148905	470037257	100903	376076443	0.0154535	0.222765	0.142914	0.994562	1	1	0.000105491	0.0135611	-0.182144	2.0092	2.08461e+09	0.562304	7.36098e+10	9.47248e+10
2010-11-06	5.61536	17	148797	469365516	100831	375539022	0.0154697	0.222765	0.143304	0.994539	1	1	0.000105548	0.0135716	-0.182125	2.00888	2.08147e+09	0.562238	7.35921e+10	9.46907e+10
2010-11-07	5.61548	17	148775	469230080	100814	375419904	0.0154244	0.222763	0.143506	0.994534	1	1	0.000105545	0.0135869	-0.1821	2.00866	2.08074e+09	0.562096	7.35864e+10	9.4685e+10
2010-11-08	5.61349	17	149109	471025228	101032	376733121	0.015388	0.222716	0.142419	0.994539	1	1	0.000105355	0.0136248	-0.181911	2.01048	2.0867e+09	0.562482	7.36186e+10	9.47161e+10
2010-11-09	5.61186	17	149116	471034358	101047	376702978	0.0153453	0.222722	0.143153	0.994555	1	1	0.000105376	0.0136193	-0.181967	2.00955	2.08641e+09	0.562855	7.36279e+10	9.47251e+10
2010-11-10	5.60752	17	149527	473216167	101387	378110286	0.0153942	0.222569	0.143661	0.994497	1	1	0.000105147	0.0137319	-0.182367	2.00677	2.09364e+09	0.563558	7.3706e+10	9.48073e+10
2010-11-11	5.60977	17	149553	473624303	101412	378704361	0.015312	0.222647	0.142936	0.994474	1	1	0.000105134	0.0134509	-0.182938	2.00589	2.0942e+09	0.563273	7.37051e+10	9.48e+10
2010-11-12	5.60804	17	149469	473041274	101353	378034611	0.0150983	0.222544	0.143753	0.994522	1	1	0.000105213	0.0135441	-0.182955	2.00522	2.092e+09	0.563622	7.37181e+10	9.48062e+10
2010-11-13	5.61485	18	159171	473324224	114096	378424848	0.0151846	0.222467	0.148386	0.994645	1	1	0.000105183	0.0136179	-0.182962	2.10468	2.14323e+09	0.562734	7.37096e+10	9.47672e+10
2010-11-14	5.61577	18	159148	473255418	114077	378400722	0.0151555	0.22246	0.147602	0.994623	1	1	0.000105157	0.0136354	-0.182834	2.10458	2.14283e+09	0.562411	7.37058e+10	9.47627e+10
2010-11-15	5.60639	18	159165	475089322	114042	379972482	0.0151747	0.222754	0.14782	0.994568	1	1	0.000104959	0.0138614	-0.182462	2.09428	2.13328e+09	0.564134	7.37716e+10	9.48367e+10
2010-11-16	5.60725	18	159063	474796824	113990	380283204	0.0151506	0.222914	0.147554	0.994581	1	1	0.00010501	0.0138919	-0.182939	2.0912	2.12578e+09	0.564136	7.36761e+10	9.47224e+10
2010-11-17	5.60784	18	158987	474482740	113914	379964829	0.0151215	0.222808	0.147854	0.994491	1	1	0.000105109	0.0139287	-0.183141	2.08957	2.12175e+09	0.564367	7.36966e+10	9.47397e+10
2010-11-18	5.60708	18	159261	475951317	114115	381045304	0.0151185	0.222849	0.147852	0.994492	1	1	0.000104988	0.013933	-0.183247	2.09138	2.12818e+09	0.564739	7.37767e+10	9.48278e+10
2010-11-19	5.60477	18	159250	475755012	114119	380822084	0.0151165	0.222837	0.14789	0.994491	1	1	0.000105035	0.0138973	-0.183353	2.09073	2.12693e+09	0.565241	7.38131e+10	9.48187e+10
2010-11-20	5.60304	18	159248	475680847	114113	380603894	0.0151346	0.222725	0.14853	0.994516	1	1	0.000105049	0.0138774	-0.18336	2.09094	2.12693e+09	0.565546	7.38351e+10	9.48427e+10
2010-11-21	5.60194	18	158936	473691359	113893	378908158	0.0151295	0.222557	0.148563	0.994488	1	1	0.000105256	0.0138939	-0.183526	2.09095	2.11748e+09	0.565593	7.38127e+10	9.48189e+10
2010-11-22	5.60107	18	159136	474856854	114029	379727746	0.0152014	0.222515	0.148413	0.994527	1	1	0.000105141	0.013984	-0.183715	2.08997	2.12153e+09	0.565826	7.38946e+10	9.49331e+10
2010-11-23	5.60032	18	159233	475449769	114104	380232955	0.0152115	0.222632	0.148349	0.994553	1	1	0.000105043	0.0139869	-0.183861	2.08945	2.12551e+09	0.565803	7.39576e+10	9.50072e+10
2010-11-24	5.59562	18	159188	474905113	114114	379973882	0.0152452	0.222961	0.149277	0.99459	1	1	0.000105087	0.01401	-0.183972	2.08843	2.12252e+09	0.566401	7.39635e+10	9.50268e+10
2010-11-25	5.58924	18	159310	475310965	114234	380203976	0.0152412	0.222865	0.149459	0.994579	1	1	0.00010506	0.0141095	-0.184053	2.08544	2.12225e+09	0.567443	7.40241e+10	9.50992e+10
2010-11-26	5.58823	18	159352	475516344	114267	380322372	0.0152309	0.222791	0.149903	0.994522	1	1	0.000105054	0.0140812	-0.184182	2.08562	2.12252e+09	0.567726	7.40445e+10	9.51364e+10
2010-11-27	5.58918	18	159273	475160319	114190	379898878	0.0152483	0.222694	0.149597	0.994541	1	1	0.000105086	0.0141009	-0.184261	2.0853	2.1208e+09	0.567491	7.40274e+10	9.51177e+10
2010-11-28	5.58979	18	159309	475430714	114210	380138877	0.0152676	0.222714	0.149986	0.994531	1	1	0.000105038	0.0140963	-0.18431	2.08575	2.12245e+09	0.567307	7.40306e+10	9.51222e+10
2010-11-29	5.58734	18	159462	476243247	114333	380811863	0.0152645	0.222805	0.149793	0.994529	1	1	0.000104947	0.0140957	-0.18464	2.08551	2.12529e+09	0.567683	7.41561e+10	9.52608e+10
2010-11-30	5.58165	18	159878	478385471	114630	382197730	0.0152635	0.222736	0.149805	0.994528	1	1	0.000104756	0.014203	-0.184468	2.08347	2.12992e+09	0.568842	7.42732e+10	9.53806e+10
2010-12-01	5.59408	18	160376	481062832	114798	382049214	0.0152502	0.220377	0.149599	0.994526	1	1	0.000104521	0.014313	-0.185056	2.11173	2.14016e+09	0.567411	7.44123e+10	9.5499e+10
2010-12-02	5.60555	18	162132	479553384	116616	380769596	0.0152573	0.2198	0.149731	0.994526	1	1	0.000104697	0.0143307	-0.185651	2.15037	2.1346e+09	0.56564	7.42847e+10	9.53524e+10
2010-12-03	5.6026	18	162187	479740581	116667	380839457	0.015242	0.21973	0.149458	0.994528	1	1	0.000104642	0.0143466	-0.18573	2.15017	2.13553e+09	0.565934	7.43266e+10	9.53895e+10
2010-12-04	5.60418	18	161939	478410481	116489	379978247	0.0152369	0.219817	0.149436	0.994524	1	1	0.00010481	0.0143633	-0.185656	2.15149	2.13107e+09	0.56581	7.43049e+10	9.53659e+10
2010-12-05	5.6003	18	161833	477201588	116443	378873501	0.0152297	0.219773	0.149863	0.994552	1	1	0.00010495	0.0144453	-0.186059	2.15746	2.1342e+09	0.566384	7.42932e+10	9.53524e+10
2010-12-06	5.59954	18	162136	478965634	116550	380331548	0.0152206	0.219813	0.149802	0.994544	1	1	0.00010476	0.014567	-0.186163	2.15759	2.14264e+09	0.566486	7.43384e+10	9.54051e+10
2010-12-07	5.59367	18	162209	478756230	116605	379435172	0.0152002	0.219519	0.149609	0.994558	1	1	0.000104737	0.0147181	-0.186446	2.16044	2.14476e+09	0.567048	7.43714e+10	9.54318e+10
2010-12-08	5.58891	18	162284	479007672	116672	379461860	0.0152114	0.219642	0.149641	0.994547	1	1	0.000104721	0.0147447	-0.186063	2.15838	2.14406e+09	0.567803	7.44316e+10	9.54881e+10
2010-12-09	5.58746	18	162211	478517390	116633	379173404	0.0152165	0.219828	0.150531	0.994521	1	1	0.000104784	0.0146923	-0.185974	2.15784	2.14046e+09	0.568048	7.46438e+10	9.57027e+10
2010-12-10	5.58269	18	162674	480962353	116984	380910559	0.0151708	0.219729	0.150134	0.994555	1	1	0.000104522	0.0148419	-0.186646	2.15691	2.15098e+09	0.568889	7.49192e+10	9.59778e+10
2010-12-11	5.58718	18	162255	478785944	116653	379337524	0.0151355	0.219799	0.149384	0.994671	1	1	0.000104772	0.0148787	-0.186953	2.15826	2.14345e+09	0.56825	7.48558e+10	9.59103e+10
2010-12-12	5.58523	17	151802	478619201	103890	379252786	0.0150348	0.219952	0.148684	0.994642	1	1	0.000104772	0.0149195	-0.186996	2.06272	2.11527e+09	0.568413	7.48253e+10	9.58518e+10
2010-12-13	5.58559	17	152048	480113217	104039	380374458	0.0150589	0.219939	0.149231	0.994661	1	1	0.000104633	0.0148113	-0.187253	2.06307	2.12107e+09	0.568489	7.58938e+10	9.69228e+10
2010-12-14	5.58472	18	155447	480551396	106374	380521447	0.0150609	0.219807	0.149228	0.994671	1	1	0.000104626	0.0149741	-0.186503	2.03222	2.12616e+09	0.568934	7.60111e+10	9.7005e+10
2010-12-15	5.58726	18	159173	483779747	112007	383044934	0.0150941	0.219518	0.147471	0.994626	1	1	0.000104362	0.0150336	-0.186655	2.01255	2.14764e+09	0.569235	7.61158e+10	9.71172e+10
2010-12-16	5.58746	18	158979	482548068	111886	382151514	0.0150931	0.219619	0.147369	0.994619	1	1	0.000104534	0.0150509	-0.186787	2.01182	2.14169e+09	0.569397	7.61643e+10	9.7181e+10
2010-12-17	5.58346	18	158944	482275376	111885	381601208	0.015063	0.219512	0.14782	0.99463	1	1	0.000104558	0.0151344	-0.187003	2.01079	2.13949e+09	0.569986	7.62074e+10	9.72459e+10
2010-12-18	5.58292	18	158933	482302944	111890	381572558	0.0150822	0.219503	0.148095	0.994562	1	1	0.000104508	0.0150857	-0.187071	2.00914	2.13918e+09	0.569818	7.49676e+10	9.50337e+10
2010-12-19	5.58742	18	158807	481589983	111782	381337146	0.0150943	0.219582	0.145046	0.994576	1	1	0.000104567	0.0151049	-0.18715	2.0094	2.13739e+09	0.569058	7.49357e+10	9.49979e+10
2010-12-20	5.58442	18	159288	485152129	112241	384258902	0.0151134	0.219744	0.145777	0.994665	1	1	0.000104204	0.0151833	-0.187068	2.00856	2.15148e+09	0.569696	7.50814e+10	9.515e+10
2010-12-21	5.58424	18	159924	486609147	113059	385082396	0.0151316	0.21947	0.147803	0.994663	1	1	0.000103929	0.0151858	-0.187685	2.01041	2.15782e+09	0.569093	7.50408e+10	9.51119e+10
2010-12-22	5.58121	18	159971	486861635	113142	385447246	0.0151469	0.219699	0.149685	0.994638	1	1	0.000103939	0.0152157	-0.18761	2.01065	2.15646e+09	0.569796	7.51681e+10	9.52634e+10
2010-12-23	5.5834	18	160217	488454477	113295	386582998	0.0151703	0.219692	0.148108	0.994667	1	1	0.000103778	0.0151979	-0.18772	2.01106	2.16605e+09	0.569497	7.52195e+10	9.52922e+10
2010-12-24	5.57914	18	160328	487786582	113278	386311724	0.015153	0.220001	0.147429	0.994762	1	1	0.000103858	0.0152012	-0.187428	2.00704	2.16082e+09	0.570161	7.52692e+10	9.53722e+10
2010-12-25	5.57781	18	160270	487375293	113246	386024326	0.0151916	0.220076	0.14629	0.994748	1	1	0.00010388	0.0151976	-0.187646	2.00622	2.15868e+09	0.570228	7.53885e+10	9.5493e+10
2010-12-26	5.5777	18	160071	486113106	113108	385049193	0.0151967	0.220055	0.146157	0.994742	1	1	0.000104016	0.0152364	-0.187687	2.0063	2.15278e+09	0.570244	7.53519e+10	9.54565e+10
2010-12-27	5.57695	18	160214	486857901	113179	385468164	0.0151957	0.219994	0.146255	0.994689	1	1	0.000103975	0.0152211	-0.187568	2.00649	2.15613e+09	0.570576	7.53428e+10	9.54514e+10
2010-12-28	5.57734	18	160467	488441045	113343	386574620	0.0152112	0.219844	0.146375	0.994606	1	1	0.000103816	0.0152919	-0.187481	2.00632	2.16298e+09	0.570572	7.54152e+10	9.55413e+10
2010-12-29	5.57473	18	160515	488507927	113380	386357869	0.0152245	0.219705	0.146323	0.994705	1	1	0.000103799	0.0153111	-0.187399	2.0056	2.16297e+09	0.570943	7.54289e+10	9.55536e+10
2010-12-30	5.57456	18	160832	490413339	113596	387523023	0.0152071	0.219459	0.146331	0.994707	1	1	0.000103592	0.0154433	-0.187514	2.00538	2.17122e+09	0.570893	7.56274e+10	9.60815e+10
2010-12-31	5.60413	20	173737	477088638	127396	377163545	0.0152	0.218375	0.145987	0.994707	1	1	0.0001049	0.0153604	-0.187213	2.17715	2.1545e+09	0.565846	7.50727e+10	9.54837e+10
2011-01-01	5.73782	19	162694	418545650	119474	329374693	0.0151746	0.212366	0.145655	0.994708	1	1	0.00011078	0.0141412	-0.188227	2.26171	1.89007e+09	0.538558	7.26443e+10	9.25359e+10
2011-01-02	5.73949	19	163104	416936345	119954	328352038	0.0152987	0.212398	0.147073	0.994593	1	1	0.000110971	0.0141404	-0.18822	2.26443	1.88154e+09	0.538134	7.26028e+10	9.24845e+10
2011-01-03	5.7402	19	163266	417818639	120070	329058334	0.0153028	0.212292	0.145662	0.994602	1	1	0.000110854	0.0141237	-0.187997	2.26508	1.88627e+09	0.538062	7.26505e+10	9.25331e+10
2011-01-04	5.74162	19	163741	420280407	120409	330908814	0.0153559	0.212321	0.144452	0.994676	1	1	0.0001106	0.0148286	-0.187695	2.2658	1.89783e+09	0.538227	7.30605e+10	9.29682e+10
2011-01-05	5.74174	19	164133	422376276	120706	332696732	0.0153882	0.212357	0.144844	0.994674	1	1	0.000110401	0.0151082	-0.187213	2.26601	1.90839e+09	0.538619	7.32363e+10	9.31669e+10
2011-01-06	5.74232	19	164433	424091682	120935	334117780	0.0153466	0.212324	0.145269	0.994649	1	1	0.000110249	0.0155466	-0.186803	2.26896	1.9169e+09	0.538964	7.35628e+10	9.34952e+10
2011-01-07	5.73762	19	164537	424721482	121011	334517540	0.0153748	0.212241	0.145915	0.994648	1	1	0.000110158	0.0155162	-0.186871	2.26007	1.91642e+09	0.539481	7.36723e+10	9.36066e+10
2011-01-08	5.7372	19	164454	424271712	120940	334042176	0.0154366	0.212189	0.146812	0.994652	1	1	0.000110213	0.0154969	-0.186805	2.2604	1.91463e+09	0.539503	7.36825e+10	9.36151e+10
2011-01-09	5.73744	19	164316	423591882	120827	333409356	0.0154905	0.212098	0.146726	0.994657	1	1	0.000110306	0.0154271	-0.186904	2.26065	1.91197e+09	0.539505	7.36678e+10	9.35998e+10
2011-01-10	5.75022	19	165882	432044847	121933	339894854	0.0154937	0.211555	0.146295	0.99462	1	1	0.00010926	0.0151958	-0.187127	2.27523	1.95778e+09	0.537989	7.38684e+10	9.38059e+10
2011-01-11	5.74672	19	166158	432698527	121935	339664574	0.0172002	0.211162	0.137752	0.994161	1	1	0.000109162	0.0152654	-0.186903	2.25801	1.96292e+09	0.538641	7.43156e+10	9.4251e+10
2011-01-12	5.7394	19	166673	435181127	122368	341248279	0.018475	0.211288	0.13793	0.993916	1	1	0.000108691	0.0152263	-0.188217	2.26012	1.97148e+09	0.538818	7.43523e+10	9.42878e+10
2011-01-13	5.74223	19	166742	435678356	122357	341073038	0.018422	0.210699	0.132267	0.993926	1	1	0.00010862	0.0152282	-0.188243	2.26175	1.97697e+09	0.538387	7.43118e+10	9.35658e+10
2011-01-14	5.74051	19	166715	435477220	122335	340787720	0.0184515	0.210727	0.132669	0.994007	1	1	0.000108671	0.0153203	-0.188435	2.26104	1.97631e+09	0.538746	7.43259e+10	9.35772e+10
2011-01-15	5.73429	19	166563	435217115	122252	340446415	0.0185575	0.210818	0.130535	0.993947	1	1	0.000108684	0.0153391	-0.188655	2.26512	1.97305e+09	0.539497	7.4362e+10	9.3614e+10
2011-01-16	5.73429	19	166367	434228589	122104	339600774	0.0187404	0.210674	0.130051	0.993835	1	1	0.000108773	0.0153244	-0.188889	2.26459	1.96889e+09	0.539327	7.43294e+10	9.35794e+10
2011-01-17	5.73217	19	166746	435904554	122385	340626798	0.0186231	0.210552	0.130782	0.994119	1	1	0.000108499	0.0152569	-0.18904	2.26465	1.97445e+09	0.539235	7.43696e+10	9.36273e+10
2011-01-18	5.73073	19	166813	436219350	122440	340849902	0.0185497	0.210587	0.130327	0.994149	1	1	0.000108512	0.0152266	-0.188997	2.263	1.97482e+09	0.539655	7.44501e+10	9.37167e+10
2011-01-19	5.69896	18	157160	433941356	112544	341131809	0.0185646	0.213091	0.125287	0.994165	1	1	0.000108496	0.0151734	-0.189362	2.16041	1.9518e+09	0.542316	7.44443e+10	9.37122e+10
2011-01-20	5.68674	18	157347	434064545	112682	340157210	0.0185385	0.212811	0.125671	0.994172	1	1	0.000108397	0.0151793	-0.189356	2.16024	1.95154e+09	0.543593	7.47474e+10	9.39928e+10
2011-01-21	5.68774	18	157368	434210661	112689	340233714	0.0185148	0.212377	0.125584	0.994176	1	1	0.000108379	0.0151661	-0.189348	2.16187	1.95373e+09	0.543442	7.47939e+10	9.40547e+10
2011-01-22	5.68819	18	157319	433894217	112668	340135698	0.0184686	0.212489	0.129962	0.994186	1	1	0.000108428	0.015118	-0.189183	2.16338	1.95276e+09	0.543439	7.47936e+10	9.40562e+10
2011-01-23	5.68808	18	157242	433464305	112612	339791448	0.0185013	0.212507	0.130592	0.994196	1	1	0.000108467	0.0151254	-0.189145	2.16321	1.95054e+09	0.543372	7.47806e+10	9.40416e+10
2011-01-24	5.68595	18	157112	433442257	112628	339760742	0.0186291	0.212527	0.12982	0.994183	1	1	0.000108478	0.0149997	-0.189738	2.17258	1.9481e+09	0.543605	7.47161e+10	9.3973e+10
2011-01-25	5.6886	18	157458	435542837	112871	341683174	0.0185625	0.212568	0.130686	0.994104	1	1	0.000108227	0.014962	-0.189753	2.17218	1.95692e+09	0.543308	7.49225e+10	9.41797e+10
2011-01-26	5.68828	18	157484	435588408	112904	341867672	0.0187148	0.212691	0.131003	0.994004	1	1	0.000108223	0.0148201	-0.18996	2.17269	1.95763e+09	0.543396	7.46795e+10	9.38048e+10
2011-01-27	5.69292	18	157669	436789586	113007	342740984	0.0187808	0.212444	0.132181	0.993942	1	1	0.000108144	0.0149686	-0.189957	2.17646	1.96921e+09	0.543156	7.47741e+10	9.38986e+10
2011-01-28	5.69124	18	157744	437154363	113059	342897891	0.0187358	0.212587	0.130939	0.99396	1	1	0.000108113	0.0149187	-0.189633	2.17532	1.97076e+09	0.543501	7.47876e+10	9.3916e+10
2011-01-29	5.69165	18	157605	436269116	112976	342365756	0.0187359	0.212666	0.13073	0.993965	1	1	0.000108229	0.0149353	-0.189648	2.17496	1.96674e+09	0.543472	7.47665e+10	9.38906e+10
2011-01-30	5.69123	18	157694	436800754	113051	342888248	0.0187165	0.212775	0.13092	0.993914	1	1	0.000108167	0.0149476	-0.189777	2.17432	1.96891e+09	0.543508	7.4828e+10	9.39408e+10
2011-01-31	5.69177	18	157570	436067387	112957	342226921	0.0187378	0.212705	0.128836	0.993855	1	1	0.000108255	0.0149495	-0.189766	2.17504	1.96622e+09	0.54345	7.47607e+10	9.3793e+10
2011-02-01	5.69436	18	157329	435138287	112674	341239078	0.0186787	0.211919	0.128484	0.99374	1	1	0.000108274	0.0147045	-0.189386	2.16822	1.96005e+09	0.542541	7.47458e+10	9.37487e+10
2011-02-02	5.69582	18	156980	433350783	112418	339929694	0.0184754	0.211978	0.12642	0.993818	1	1	0.000108446	0.0148428	-0.189375	2.16915	1.95215e+09	0.542014	7.47085e+10	9.37083e+10
2011-02-03	5.69392	18	156866	432644380	112344	339351624	0.018522	0.211939	0.126098	0.993912	1	1	0.000108521	0.0148322	-0.189281	2.16807	1.94844e+09	0.542229	7.46669e+10	9.36667e+10
2011-02-04	5.69367	18	156813	432345353	112307	339121402	0.0185607	0.211952	0.12645	0.993915	1	1	0.000108572	0.014837	-0.189283	2.16808	1.94721e+09	0.542333	7.4664e+10	9.36638e+10
2011-02-05	5.6858	18	156453	429997647	112079	337115608	0.0187533	0.212052	0.126488	0.994108	1	1	0.000108829	0.0148671	-0.189509	2.16528	1.93313e+09	0.543197	7.4636e+10	9.36275e+10
2011-02-06	5.68144	18	156420	429667359	112083	336910095	0.0187024	0.212267	0.125868	0.993966	1	1	0.000108829	0.0147992	-0.189461	2.16124	1.92699e+09	0.543571	7.46278e+10	9.36173e+10
2011-02-07	5.68117	18	156417	429647341	112082	336919255	0.0186176	0.212293	0.123355	0.993943	1	1	0.000108829	0.0148117	-0.189404	2.161	1.92668e+09	0.543591	7.46297e+10	9.36192e+10
2011-02-08	5.68137	18	156473	429941877	112128	337203102	0.0185904	0.212313	0.123679	0.993811	1	1	0.000108791	0.0148073	-0.189277	2.16126	1.92784e+09	0.543555	7.46993e+10	9.36927e+10
2011-02-09	5.68089	18	156443	429765786	112095	337009694	0.0185805	0.212288	0.120635	0.994092	1	1	0.000108793	0.0148103	-0.189207	2.16109	1.92717e+09	0.543511	7.47042e+10	9.36964e+10
2011-02-10	5.68127	18	156599	430703594	112191	337680454	0.0185414	0.212121	0.118019	0.99396	1	1	0.000108735	0.0147801	-0.18942	2.16103	1.93178e+09	0.543772	7.47956e+10	9.39088e+10
2011-02-11	5.68102	18	156639	430894311	112225	337872710	0.0187961	0.212176	0.122286	0.99474	1	1	0.000108728	0.0147961	-0.1895	2.16058	1.93203e+09	0.543904	7.45572e+10	9.33507e+10
2011-02-12	5.67774	18	156673	430855338	112250	337556276	0.0188379	0.212105	0.122651	0.994839	1	1	0.000108721	0.014793	-0.189569	2.16026	1.93196e+09	0.544299	7.45728e+10	9.33664e+10
2011-02-13	5.6779	18	156660	430797481	112241	337532383	0.0188299	0.212118	0.122938	0.994882	1	1	0.000108732	0.0148484	-0.18958	2.16031	1.93172e+09	0.544287	7.45687e+10	9.33623e+10
2011-02-14	5.67473	18	156842	431606058	112363	337783716	0.018787	0.212063	0.120461	0.995067	1	1	0.000108619	0.0148213	-0.189708	2.15987	1.93715e+09	0.544804	7.45996e+10	9.33955e+10
2011-02-15	5.67312	18	150784	433866027	106686	339606086	0.0188032	0.212028	0.120861	0.995116	1	1	0.000108298	0.0148414	-0.189736	2.18571	1.95368e+09	0.544562	7.46251e+10	9.34226e+10
2011-02-16	5.67161	18	150753	433680312	106683	339475229	0.0186289	0.212082	0.121281	0.9951	1	1	0.000108315	0.0148288	-0.189822	2.1845	1.95239e+09	0.544752	7.46372e+10	9.34673e+10
2011-02-17	5.67043	18	150907	434502092	106805	340167724	0.0186243	0.212148	0.120405	0.995098	1	1	0.000108225	0.0149074	-0.189984	2.18405	1.95543e+09	0.544961	7.47321e+10	9.35624e+10
2011-02-18	5.66829	18	151090	435532150	106965	341166932	0.018565	0.212539	0.120499	0.995015	1	1	0.000108071	0.0148872	-0.190261	2.1797	1.95876e+09	0.545031	7.47904e+10	9.36209e+10
2011-02-19	5.66988	18	151042	435302814	106919	340946764	0.0185765	0.212475	0.120666	0.995049	1	1	0.0001081	0.0148871	-0.190273	2.18171	1.96003e+09	0.544838	7.52447e+10	9.40629e+10
2011-02-20	5.66961	18	151043	435633525	106896	341121742	0.0184738	0.212359	0.120623	0.994902	1	1	0.000108058	0.014892	-0.19023	2.18068	1.9615e+09	0.544894	7.52771e+10	9.40982e+10
2011-02-21	5.67216	18	151248	436884628	106947	342423948	0.0185092	0.212357	0.120657	0.994954	1	1	0.00010794	0.0150362	-0.190252	2.17971	1.96622e+09	0.544729	7.53348e+10	9.41592e+10
2011-02-22	5.67131	18	151517	438439634	107137	343641598	0.0184438	0.212172	0.120604	0.994966	1	1	0.000107729	0.0150717	-0.19039	2.1796	1.97294e+09	0.54473	7.53528e+10	9.41765e+10
2011-02-23	5.67196	18	151648	439195341	107226	344201502	0.0183517	0.212114	0.121033	0.994796	1	1	0.000107665	0.0150176	-0.190338	2.17979	1.97665e+09	0.544815	7.5378e+10	9.42102e+10
2011-02-24	5.66679	18	151756	439783119	107297	344439729	0.0182919	0.212152	0.121447	0.994715	1	1	0.000107546	0.0149336	-0.190536	2.17091	1.97012e+09	0.545244	7.53823e+10	9.42143e+10
2011-02-25	5.67094	18	152151	442297965	107538	346451790	0.0182873	0.21226	0.121003	0.994762	1	1	0.00010725	0.0149149	-0.190463	2.17111	1.98274e+09	0.544742	7.54956e+10	9.43301e+10
2011-02-26	5.66954	18	151935	440985938	107386	345358470	0.0182839	0.212254	0.12129	0.994825	1	1	0.00010742	0.014882	-0.190527	2.17082	1.97512e+09	0.545005	7.54854e+10	9.432e+10
2011-02-27	5.66977	18	151876	440650238	107343	345101668	0.0182957	0.212249	0.121874	0.994186	1	1	0.000107474	0.0148875	-0.190547	2.17086	1.97374e+09	0.545039	7.54822e+10	9.43168e+10
2011-02-28	5.66574	18	152271	442742214	107645	346573216	0.0183003	0.212278	0.122208	0.994187	1	1	0.000107217	0.0148563	-0.190623	2.16979	1.98289e+09	0.545622	7.55596e+10	9.43919e+10
2011-03-01	5.63941	18	151916	447336664	107310	350941796	0.0182642	0.213571	0.122224	0.994044	1	1	0.000106524	0.0151036	-0.191082	2.156	1.99862e+09	0.548597	7.59567e+10	9.47744e+10
2011-03-02	5.64983	18	152299	448590201	107496	352030484	0.018244	0.213426	0.122866	0.994106	1	1	0.000106366	0.0147758	-0.191112	2.14264	2.00201e+09	0.54706	7.53865e+10	9.4193e+10
2011-03-03	5.64758	18	152405	449052131	107664	353334284	0.0182349	0.214152	0.12225	0.994042	1	1	0.000106315	0.0147621	-0.19099	2.14303	2.00585e+09	0.547468	7.54113e+10	9.42171e+10
2011-03-04	5.65013	18	152417	449255099	107642	353412334	0.0181131	0.214051	0.122195	0.993798	1	1	0.000106308	0.0147632	-0.191118	2.14423	2.00832e+09	0.547224	7.54267e+10	9.42325e+10
2011-03-05	5.6454	18	152403	449021581	107648	353022819	0.018187	0.214094	0.121633	0.993997	1	1	0.000106319	0.0147607	-0.191165	2.14	2.00163e+09	0.547759	7.54616e+10	9.42692e+10
2011-03-06	5.64551	18	152400	449030166	107647	353014763	0.0181083	0.213985	0.122055	0.993782	1	1	0.000106306	0.0147617	-0.191041	2.14	2.00185e+09	0.547683	7.54692e+10	9.42768e+10
2011-03-07	5.64654	18	152501	449610630	107717	353481980	0.0181299	0.213967	0.12171	0.993815	1	1	0.000106264	0.0148463	-0.190987	2.14031	2.00403e+09	0.5477	7.55387e+10	9.43463e+10
2011-03-08	5.64271	18	152699	450445573	107864	353878706	0.0179707	0.213841	0.122148	0.993579	1	1	0.000106132	0.0148526	-0.190522	2.14016	2.0078e+09	0.548237	7.55644e+10	9.43745e+10
2011-03-09	5.6432	18	152840	451269882	107958	354456725	0.018006	0.2138	0.117167	0.99383	1	1	0.000106048	0.0148325	-0.190457	2.14089	2.0143e+09	0.54825	7.55715e+10	9.43816e+10
2011-03-10	5.63715	18	153196	452926912	108274	356001626	0.018006	0.214732	0.117002	0.993753	1	1	0.000105864	0.0147837	-0.190327	2.14049	2.02029e+09	0.549316	7.56919e+10	9.45029e+10
2011-03-11	5.63736	18	153165	452872681	108271	356304142	0.0180037	0.215061	0.116966	0.993718	1	1	0.000105862	0.0148517	-0.190804	2.13912	2.05324e+09	0.54904	7.61484e+10	9.4958e+10
2011-03-12	5.63822	18	153136	452727540	108237	356080530	0.0179305	0.215088	0.117	0.993686	1	1	0.000105875	0.0148567	-0.190775	2.13958	2.05246e+09	0.548873	7.61615e+10	9.49684e+10
2011-03-13	5.63724	18	153036	452291293	108129	355716150	0.0181267	0.215095	0.118963	0.99438	1	1	0.000105915	0.0148525	-0.190874	2.13684	2.04707e+09	0.548963	7.61548e+10	9.49342e+10
2011-03-14	5.63431	18	153306	453770698	108334	356873592	0.0183349	0.215036	0.11799	0.994298	1	1	0.000105732	0.0148231	-0.191668	2.13482	2.05145e+09	0.549279	7.61683e+10	9.49411e+10
2011-03-15	5.63186	18	153596	455361998	108538	357839704	0.0183755	0.214827	0.118591	0.994435	1	1	0.000105613	0.0150392	-0.191322	2.13456	2.05742e+09	0.550128	7.63044e+10	9.50819e+10
2011-03-16	5.6325	18	153722	456058794	108595	357938466	0.0182404	0.214398	0.118973	0.994057	1	1	0.00010552	0.0150224	-0.1913	2.13545	2.06151e+09	0.549954	7.62174e+10	9.4997e+10
2011-03-17	5.63008	18	153778	456149623	108643	357856826	0.0181173	0.214394	0.119035	0.9938	1	1	0.000105496	0.0150118	-0.191474	2.1371	2.06203e+09	0.550261	7.62356e+10	9.50147e+10
2011-03-18	5.62979	18	153898	456843217	108726	358298874	0.0181082	0.214318	0.119158	0.993826	1	1	0.000105436	0.0151088	-0.191472	2.13651	2.06487e+09	0.55039	7.63121e+10	9.50949e+10
2011-03-19	5.63183	18	153831	456363117	108679	358023833	0.0180643	0.214399	0.119197	0.993673	1	1	0.000105492	0.0151472	-0.19142	2.13858	2.0636e+09	0.550092	7.62931e+10	9.50744e+10
2011-03-20	5.63256	18	153977	457282745	108617	356689693	0.0180685	0.212252	0.119166	0.993682	1	1	0.000105392	0.0151706	-0.191349	2.13954	2.06793e+09	0.55	7.68811e+10	9.56627e+10
2011-03-21	5.62576	18	153905	457233147	108538	356360544	0.0179688	0.212247	0.119407	0.993705	1	1	0.000105338	0.0152328	-0.19129	2.13492	2.06688e+09	0.550729	7.68944e+10	9.56785e+10
2011-03-22	5.62948	18	154206	459187805	108736	358011327	0.0178028	0.212245	0.119688	0.993821	1	1	0.000105143	0.0151928	-0.191015	2.13746	2.08008e+09	0.550395	7.69774e+10	9.57484e+10
2011-03-23	5.63245	18	154390	460437810	108854	359053201	0.0177048	0.212293	0.119915	0.993991	1	1	0.000105023	0.0149624	-0.191125	2.13769	2.08683e+09	0.55007	7.70079e+10	9.57795e+10
2011-03-24	5.63156	18	154433	460581191	108893	359156992	0.0177527	0.212264	0.122092	0.993997	1	1	0.000105016	0.0149344	-0.191075	2.13759	2.08713e+09	0.550272	7.70292e+10	9.58008e+10
2011-03-25	5.62668	18	154615	461405878	109036	359534282	0.0177494	0.21217	0.122027	0.994022	1	1	0.000104975	0.0151559	-0.190583	2.13556	2.08853e+09	0.551328	7.74894e+10	9.62683e+10
2011-03-26	5.62693	18	154566	461138203	108986	359136451	0.0177326	0.211976	0.122807	0.994032	1	1	0.000104974	0.0151708	-0.190522	2.13571	2.08894e+09	0.551127	7.75598e+10	9.63382e+10
2011-03-27	5.62781	18	154535	460993830	108959	359030860	0.017752	0.21198	0.121594	0.993982	1	1	0.00010498	0.0151767	-0.190536	2.13641	2.08882e+09	0.550964	7.75563e+10	9.63347e+10
2011-03-28	5.62449	18	154799	462451678	109157	360070276	0.0178818	0.212062	0.12135	0.99391	1	1	0.000104825	0.0150967	-0.190908	2.13571	2.09453e+09	0.551496	7.7656e+10	9.64293e+10
2011-03-29	5.62198	18	154929	461956882	109139	359564544	0.0178249	0.212043	0.116113	0.993897	1	1	0.000104909	0.0151301	-0.190792	2.12839	2.09367e+09	0.55203	7.77444e+10	9.65231e+10
2011-03-30	5.61756	18	155123	462962785	109262	359687153	0.0177456	0.21171	0.116935	0.993793	1	1	0.00010478	0.0151654	-0.190722	2.12654	2.0855e+09	0.552599	7.77545e+10	9.65265e+10
2011-03-31	5.61899	18	155245	463153171	109374	359767022	0.0177421	0.211695	0.116485	0.993824	1	1	0.000104782	0.0150993	-0.190353	2.13483	2.09094e+09	0.552448	7.79159e+10	9.66922e+10
2011-04-01	5.61661	18	155617	464906208	109671	361155351	0.017859	0.211644	0.116671	0.99374	1	1	0.000104337	0.0152037	-0.190799	2.13647	2.09893e+09	0.551362	7.80897e+10	9.68791e+10
2011-04-02	5.62545	18	155600	464697628	109628	361582660	0.0177592	0.211925	0.12108	0.993808	1	1	0.000104439	0.0152663	-0.1911	2.13784	2.09644e+09	0.550357	7.80226e+10	9.68121e+10
2011-04-03	5.62549	18	155590	464628322	109623	361539634	0.017687	0.211923	0.120841	0.993853	1	1	0.000104437	0.0152675	-0.191078	2.13766	2.09609e+09	0.550295	7.80183e+10	9.68056e+10
2011-04-04	5.6245	18	155571	464474491	109614	361404662	0.0178891	0.211941	0.121535	0.99375	1	1	0.000104447	0.0152683	-0.19104	2.13706	2.09498e+09	0.550393	7.80138e+10	9.68011e+10
2011-04-05	5.62357	18	155599	464614523	109634	361449406	0.0179571	0.211944	0.12169	0.993708	1	1	0.000104459	0.0152394	-0.191137	2.13689	2.09507e+09	0.550683	7.81822e+10	9.69695e+10
2011-04-06	5.62349	18	155838	466127180	109796	362697376	0.0179437	0.211877	0.1247	0.993811	1	1	0.000104312	0.015147	-0.19106	2.13528	2.10186e+09	0.550837	7.82329e+10	9.702e+10
2011-04-07	5.61903	18	155950	466770500	109873	362913590	0.0179472	0.211754	0.125595	0.99401	1	1	0.00010423	0.0151364	-0.190684	2.12973	2.09768e+09	0.551392	7.82787e+10	9.70676e+10
2011-04-08	5.61755	18	156022	467154389	109919	363049060	0.0179449	0.211683	0.125405	0.994011	1	1	0.000104183	0.01509	-0.190162	2.12976	2.09929e+09	0.551662	7.83259e+10	9.71122e+10
2011-04-09	5.61769	18	155911	466514509	109843	362593250	0.0179402	0.211611	0.125417	0.994012	1	1	0.000104256	0.0151008	-0.190129	2.13002	2.0977e+09	0.551655	7.83001e+10	9.70828e+10
2011-04-10	5.61502	18	155852	466003736	109779	361684328	0.0179391	0.211219	0.125417	0.994009	1	1	0.000104327	0.0150838	-0.190119	2.12981	2.09108e+09	0.552102	7.81221e+10	9.69029e+10
2011-04-11	5.60891	18	155864	465929960	109820	361632100	0.0179991	0.211387	0.125618	0.993974	1	1	0.000104308	0.0150703	-0.190442	2.12318	2.09106e+09	0.552871	7.81321e+10	9.69166e+10
2011-04-12	5.65735	18	158093	481250304	111163	373864020	0.0179642	0.210796	0.125165	0.993922	1	1	0.000102823	0.0149492	-0.193973	2.16116	2.18541e+09	0.547104	7.8174e+10	9.69592e+10
2011-04-13	5.65637	18	158160	481536648	111232	374237171	0.0183591	0.210961	0.130059	0.994472	1	1	0.000102786	0.0149532	-0.194226	2.15999	2.18615e+09	0.547217	7.81588e+10	9.69314e+10
2011-04-14	5.65496	18	158175	481564119	111251	374175761	0.0183256	0.210883	0.130405	0.994547	1	1	0.000102795	0.0150919	-0.193897	2.16065	2.18648e+09	0.547517	7.81795e+10	9.69521e+10
2011-04-15	5.65486	18	158521	483549677	111430	374979826	0.0182846	0.21009	0.129953	0.994291	1	1	0.000102646	0.0152571	-0.193892	2.16065	2.1949e+09	0.547819	7.82566e+10	9.70311e+10
2011-04-16	5.65324	18	158336	482229160	111316	373899176	0.0182732	0.210204	0.131615	0.99458	1	1	0.000102769	0.0151534	-0.194049	2.16127	2.18821e+09	0.547865	7.81681e+10	9.69259e+10
2011-04-17	5.65498	18	158312	482156422	111296	373941572	0.0182792	0.210234	0.128943	0.994835	1	1	0.000102787	0.0151575	-0.194152	2.16138	2.18838e+09	0.547652	7.81689e+10	9.69267e+10
2011-04-18	5.64895	18	158456	482749349	111417	374240122	0.018165	0.211848	0.129054	0.994585	1	1	0.000102691	0.0152203	-0.194255	2.15621	2.1896e+09	0.548402	7.82178e+10	9.6975e+10
2011-04-19	5.64803	18	158500	482966225	111455	374427588	0.0181379	0.211863	0.129289	0.99463	1	1	0.000102646	0.0152126	-0.194476	2.15596	2.18967e+09	0.548403	7.8254e+10	9.70089e+10
2011-04-20	5.65023	18	158903	485669742	111746	376736508	0.0180895	0.211701	0.130168	0.994327	1	1	0.000102405	0.0152383	-0.194584	2.15547	2.20315e+09	0.548277	7.83683e+10	9.71222e+10
2011-04-21	5.65035	18	158861	485309778	111707	376400604	0.0180871	0.211664	0.132658	0.994266	1	1	0.000102472	0.0153055	-0.194541	2.15765	2.20161e+09	0.548433	7.83936e+10	9.7149e+10
2011-04-22	5.65066	18	158985	486077330	111794	377023253	0.0180741	0.211705	0.132749	0.99423	1	1	0.000102403	0.015245	-0.194383	2.15734	2.20485e+09	0.548492	7.84126e+10	9.71686e+10
2011-04-23	5.65034	18	158903	485604558	111739	376703932	0.0180612	0.211755	0.132919	0.994126	1	1	0.000102438	0.0152307	-0.194326	2.15733	2.20238e+09	0.548446	7.84088e+10	9.71624e+10
2011-04-24	5.65025	18	158804	485004767	111674	376299501	0.0180609	0.21177	0.129228	0.994559	1	1	0.000102523	0.0152272	-0.194311	2.15774	2.19998e+09	0.548578	7.84049e+10	9.71583e+10
2011-04-25	5.64719	18	159080	486519626	111887	377427881	0.0180703	0.211961	0.129369	0.994543	1	1	0.000102375	0.0152339	-0.194494	2.15712	2.20589e+09	0.549137	7.84638e+10	9.72242e+10
2011-04-26	5.64343	18	159073	486417467	111887	377192484	0.018107	0.211979	0.129741	0.994613	1	1	0.000102363	0.0154293	-0.194312	2.15551	2.20539e+09	0.549571	7.85121e+10	9.72702e+10
2011-04-27	5.64022	18	159159	486808030	111951	377315684	0.0181284	0.211939	0.129618	0.994791	1	1	0.000102315	0.0154106	-0.194204	2.15397	2.20519e+09	0.550035	7.8544e+10	9.73023e+10
2011-04-28	5.64787	18	159869	489622178	112219	379573636	0.0180348	0.212637	0.129859	0.994652	1	1	0.000102061	0.0153543	-0.193745	2.16124	2.22536e+09	0.54933	7.86262e+10	9.74271e+10
2011-04-29	5.64596	18	159915	489828931	112254	379588193	0.0180513	0.21251	0.130103	0.994838	1	1	0.000102041	0.0153896	-0.193651	2.15994	2.22574e+09	0.549578	7.86437e+10	9.73987e+10
2011-04-30	5.64356	18	159852	489397626	112216	379191492	0.0180502	0.212541	0.131001	0.994826	1	1	0.000102099	0.01544	-0.193546	2.16	2.22365e+09	0.550033	7.87877e+10	9.7522e+10
2011-05-01	5.65464	18	159668	488795575	111997	377799515	0.0180526	0.210152	0.131554	0.994896	1	1	0.000102131	0.0151809	-0.193606	2.17144	2.22374e+09	0.548372	7.85126e+10	9.72758e+10
2011-05-02	5.66372	18	159707	489133704	111955	378381459	0.0179537	0.209563	0.131163	0.994823	1	1	0.000102183	0.0153233	-0.193279	2.17462	2.23102e+09	0.547621	7.81761e+10	9.69251e+10
2011-05-03	5.66247	18	159861	489993870	112105	379429496	0.017989	0.209502	0.130852	0.994707	1	1	0.000102138	0.015291	-0.193307	2.17472	2.23536e+09	0.548105	7.82e+10	9.695e+10
2011-05-04	5.66068	18	159898	490807248	112238	380331125	0.0179404	0.209794	0.131377	0.995378	1	1	0.000102103	0.0153387	-0.193427	2.17497	2.23733e+09	0.548634	7.8266e+10	9.70161e+10
2011-05-05	5.65826	18	160032	491641581	112321	380622317	0.0179286	0.209585	0.131668	0.995329	1	1	0.000102013	0.0152974	-0.193457	2.17511	2.23741e+09	0.549023	7.83041e+10	9.70568e+10
2011-05-06	5.65885	18	160188	492738029	112451	381647323	0.0178569	0.209652	0.131562	0.99523	1	1	0.000101889	0.0153889	-0.193126	2.17547	2.24161e+09	0.548886	7.82719e+10	9.7032e+10
2011-05-07	5.66031	18	160085	492118391	112363	381274394	0.017864	0.20967	0.131545	0.995236	1	1	0.000101957	0.0153883	-0.192966	2.17867	2.23931e+09	0.548709	7.82494e+10	9.70075e+10
2011-05-08	5.66073	18	159965	491408133	112116	378690347	0.0179406	0.208795	0.132586	0.995503	1	1	0.00010206	0.0155052	-0.192933	2.17975	2.23665e+09	0.548783	7.83049e+10	9.70646e+10
2011-05-09	5.66167	18	160122	492385573	112222	379409235	0.017843	0.208056	0.129825	0.995514	1	1	0.000101949	0.0154493	-0.192743	2.1803	2.24142e+09	0.548562	7.83514e+10	9.71104e+10
2011-05-10	5.65495	18	160571	494564139	112531	381036476	0.0177911	0.20761	0.129935	0.995388	1	1	0.000101745	0.0154242	-0.192884	2.17622	2.24419e+09	0.549573	7.85203e+10	9.73243e+10
2011-05-11	5.65648	18	160514	494100109	112510	380833118	0.0177083	0.20757	0.130216	0.995188	1	1	0.0001018	0.0154765	-0.192405	2.18041	2.24564e+09	0.549433	7.85407e+10	9.73356e+10
2011-05-12	5.65419	18	160359	493003535	112400	379904494	0.0177526	0.207546	0.12983	0.995344	1	1	0.000101979	0.0155735	-0.192485	2.1803	2.23863e+09	0.550131	7.8311e+10	9.71063e+10
2011-05-13	5.63974	18	160310	492414375	112467	379991415	0.0178966	0.207445	0.126777	0.996061	1	1	0.000101909	0.0155643	-0.193001	2.1601	2.23447e+09	0.551282	7.83137e+10	9.7107e+10
2011-05-14	5.63892	18	160208	491746582	112402	379484226	0.0178576	0.207457	0.126191	0.995914	1	1	0.000101981	0.015573	-0.192884	2.16011	2.23122e+09	0.551409	7.83074e+10	9.70937e+10
2011-05-15	5.63338	18	160352	492380172	112498	379681958	0.0178246	0.207725	0.126424	0.995933	1	1	0.000101898	0.015549	-0.192978	2.1569	2.23249e+09	0.552115	7.83274e+10	9.71141e+10
2011-05-16	5.63366	18	160440	493075120	112564	380104285	0.0178411	0.20753	0.127047	0.995896	1	1	0.00010184	0.0155406	-0.192719	2.15637	2.23507e+09	0.552117	7.83538e+10	9.71401e+10
2011-05-17	5.63314	18	160368	492806436	112508	379876296	0.0177499	0.207587	0.127303	0.995718	1	1	0.000101886	0.0155148	-0.192839	2.15287	2.2296e+09	0.552288	7.83617e+10	9.71439e+10
2011-05-18	5.62811	18	160275	493707275	112566	380297386	0.0177759	0.207557	0.127418	0.995723	1	1	0.000101786	0.01559	-0.192997	2.13726	2.22806e+09	0.552963	7.84959e+10	9.72829e+10
2011-05-19	5.6284	18	160331	494105215	112613	380758088	0.017827	0.207536	0.129027	0.995713	1	1	0.000101743	0.015568	-0.193354	2.13749	2.22905e+09	0.552883	7.8534e+10	9.73355e+10
2011-05-20	5.62982	18	160615	496470161	112711	381669016	0.0178341	0.208139	0.129996	0.995722	1	1	0.000101573	0.0156124	-0.193118	2.13274	2.23775e+09	0.553032	7.86196e+10	9.75231e+10
2011-05-21	5.63433	18	160521	496045582	112632	381472114	0.0177107	0.208398	0.130237	0.995475	1	1	0.000101577	0.0155932	-0.193022	2.13651	2.23856e+09	0.552118	7.86195e+10	9.75214e+10
2011-05-22	5.63147	18	160414	495270764	112547	380549632	0.017732	0.208453	0.131876	0.995445	1	1	0.00010161	0.0155902	-0.193141	2.13423	2.23147e+09	0.552206	7.85728e+10	9.74659e+10
2011-05-23	5.62925	18	160712	497093488	112777	382049576	0.0176866	0.208419	0.130111	0.99542	1	1	0.000101407	0.0156109	-0.19336	2.13583	2.24002e+09	0.552455	7.86351e+10	9.75243e+10
2011-05-24	5.62697	18	160837	497715183	112880	382493684	0.0174855	0.208437	0.130398	0.995078	1	1	0.000101319	0.0156105	-0.193443	2.13518	2.24182e+09	0.552645	7.8643e+10	9.75331e+10
2011-05-25	5.6324	18	161053	499544674	112845	381993440	0.0174162	0.207987	0.130349	0.994983	1	1	0.000101158	0.0156685	-0.193503	2.13491	2.24986e+09	0.55192	7.86728e+10	9.75749e+10
2011-05-26	5.63149	18	161213	500514761	112962	382538318	0.0174714	0.209767	0.130453	0.995132	1	1	0.000101064	0.0156611	-0.193036	2.1346	2.25465e+09	0.552159	7.87403e+10	9.76859e+10
2011-05-27	5.63476	18	161397	500879766	112983	383381948	0.0174644	0.208364	0.130611	0.995136	1	1	0.000101077	0.0157528	-0.193201	2.11291	2.22169e+09	0.551717	7.9025e+10	9.79725e+10
2011-05-28	5.63583	18	161295	500223626	112884	382759936	0.0173953	0.208518	0.130798	0.994991	1	1	0.000101133	0.0157322	-0.193118	2.11245	2.2181e+09	0.551487	7.90266e+10	9.79734e+10
2011-05-29	5.63908	18	161103	499160956	112743	382121052	0.0173791	0.208455	0.129192	0.995036	1	1	0.000101254	0.015744	-0.193012	2.1156	2.21641e+09	0.551088	7.90115e+10	9.79408e+10
2011-05-30	5.63743	18	161459	501268014	112993	383545588	0.0172526	0.208489	0.127921	0.994673	1	1	0.00010108	0.0157767	-0.193192	2.11599	2.22582e+09	0.551525	7.90122e+10	9.80208e+10
2011-05-31	5.63581	18	163154	499396974	114723	381443512	0.0172133	0.208484	0.128197	0.99451	1	1	0.000101198	0.0156606	-0.193313	2.12411	2.28529e+09	0.551264	7.89522e+10	9.7952e+10
2011-06-01	5.6272	18	163566	500958994	114592	379460420	0.0172457	0.208153	0.128476	0.994492	1	1	0.000101026	0.0157544	-0.193716	2.10821	2.28496e+09	0.552258	7.91203e+10	9.81648e+10
2011-06-02	5.62875	18	163197	498846377	114313	377926054	0.0173107	0.205727	0.128734	0.994678	1	1	0.000101245	0.0159434	-0.193969	2.10855	2.27548e+09	0.551941	7.85227e+10	9.75664e+10
2011-06-03	5.6278	18	163232	499061298	114333	377956608	0.0172909	0.205633	0.128848	0.994698	1	1	0.00010128	0.0160131	-0.193815	2.10746	2.27667e+09	0.552425	7.85456e+10	9.75897e+10
2011-06-04	5.62753	18	163135	498512748	114274	377664666	0.0174355	0.205672	0.13029	0.994948	1	1	0.000101336	0.0160265	-0.193741	2.10653	2.27398e+09	0.552447	7.85411e+10	9.75852e+10
2011-06-05	5.62859	18	163137	498532209	114278	377763428	0.0175148	0.205674	0.130678	0.995013	1	1	0.00010134	0.0160263	-0.193539	2.1077	2.27437e+09	0.552329	7.85313e+10	9.75696e+10
2011-06-06	5.62547	18	163155	498331010	114317	377567410	0.0174139	0.205926	0.129601	0.994668	1	1	0.00010133	0.0159695	-0.193476	2.10617	2.26759e+09	0.552493	7.85504e+10	9.75753e+10
2011-06-07	5.62458	18	163308	499300031	114367	377495162	0.0174863	0.205984	0.129681	0.994786	1	1	0.000101236	0.0159465	-0.193588	2.10516	2.2698e+09	0.552596	7.85765e+10	9.75987e+10
2011-06-08	5.62494	18	163633	501433464	114636	379682418	0.0175874	0.205875	0.12891	0.995072	1	1	0.000100997	0.0159207	-0.19397	2.10717	2.27869e+09	0.552429	7.86464e+10	9.76526e+10
2011-06-09	5.6223	18	163648	501498068	114681	379518090	0.0175862	0.205886	0.129344	0.995082	1	1	0.000101009	0.0160164	-0.193884	2.10705	2.27909e+09	0.552959	7.86988e+10	9.77103e+10
2011-06-10	5.62274	18	163981	503492218	114923	381061526	0.0175803	0.205793	0.129219	0.995083	1	1	0.00010084	0.0159996	-0.194057	2.10972	2.28924e+09	0.553068	7.88147e+10	9.78269e+10
2011-06-11	5.625	18	163800	502490206	114794	380474172	0.017666	0.205605	0.129617	0.995302	1	1	0.00010092	0.016034	-0.194007	2.11121	2.28538e+09	0.552657	7.87541e+10	9.77641e+10
2011-06-12	5.60426	18	162515	493323234	114071	373034832	0.017636	0.205045	0.129361	0.995235	1	1	0.000101831	0.0161681	-0.192843	2.11122	2.24296e+09	0.555533	7.87099e+10	9.77194e+10
2011-06-13	5.60716	18	162766	494993937	114208	374248530	0.0176247	0.205079	0.127112	0.994889	1	1	0.000101676	0.0161304	-0.192777	2.11326	2.25384e+09	0.555199	7.87759e+10	9.78377e+10
2011-06-14	5.60678	18	162851	495481571	114261	374473992	0.0183283	0.205043	0.143185	0.995825	1	1	0.000101637	0.0161015	-0.192629	2.11342	2.25639e+09	0.55537	7.87824e+10	9.78449e+10
2011-06-15	5.60216	17	163157	497608745	114555	376205401	0.0181694	0.204916	0.143349	0.995568	1	1	0.000101423	0.0160221	-0.192908	2.10187	2.26404e+09	0.556184	7.887e+10	9.79388e+10
2011-06-16	5.59905	17	163167	497332236	114604	376118898	0.0182941	0.204521	0.143215	0.995792	1	1	0.000101428	0.015988	-0.192725	2.10321	2.26807e+09	0.556617	7.89704e+10	9.80394e+10
2011-06-17	5.59766	17	163173	497283896	114619	376095782	0.0183015	0.204722	0.143168	0.99581	1	1	0.000101458	0.015984	-0.19272	2.10246	2.26711e+09	0.556972	7.90524e+10	9.81374e+10
2011-06-18	5.59351	17	163181	497511500	114639	376299856	0.0183041	0.205048	0.143257	0.995842	1	1	0.000101449	0.015974	-0.193468	2.10604	2.27063e+09	0.55771	7.90764e+10	9.81612e+10
2011-06-19	5.59417	17	163084	496899410	114556	375893038	0.0183016	0.2051	0.143506	0.995872	1	1	0.000101502	0.0159889	-0.193376	2.10648	2.26786e+09	0.557569	7.90693e+10	9.8152e+10
2011-06-20	5.58752	17	163469	498993345	114908	377676945	0.0182648	0.205369	0.143839	0.995901	1	1	0.000101381	0.0161155	-0.193239	2.10482	2.27842e+09	0.559156	7.9198e+10	9.82933e+10
2011-06-21	5.59021	17	163517	499532341	114925	378128108	0.0182822	0.205458	0.144119	0.995914	1	1	0.000101309	0.0160679	-0.193193	2.10514	2.28129e+09	0.558661	7.92059e+10	9.8301e+10
2011-06-22	5.59067	17	163692	500620213	115042	378944309	0.0183221	0.205479	0.1441	0.995945	1	1	0.000101192	0.0161632	-0.193208	2.10453	2.28582e+09	0.558539	7.92631e+10	9.83603e+10
2011-06-23	5.58884	18	163705	500755181	115175	379215667	0.0183134	0.204836	0.14412	0.995938	1	1	0.000101176	0.0161584	-0.193561	2.11445	2.28601e+09	0.558726	7.93383e+10	9.84414e+10
2011-06-24	5.58936	18	163907	501999619	115241	379151378	0.018276	0.20455	0.144196	0.99584	1	1	0.000101024	0.0161716	-0.193547	2.11555	2.29021e+09	0.558442	7.93344e+10	9.84166e+10
2011-06-25	5.5877	18	163820	501401286	115194	378743518	0.0183159	0.204611	0.143493	0.996024	1	1	0.000101098	0.0161013	-0.193619	2.11471	2.28668e+09	0.558748	7.93295e+10	9.84114e+10
2011-06-26	5.58839	18	163815	501389077	115198	378779078	0.0182577	0.204462	0.145151	0.996001	1	1	0.000101091	0.0160997	-0.193515	2.11462	2.286e+09	0.558549	7.93173e+10	9.83943e+10
2011-06-27	5.58654	18	164066	502795470	115378	379647639	0.0182978	0.204933	0.13603	0.996075	1	1	0.000100969	0.0160989	-0.193752	2.11506	2.29342e+09	0.558984	7.95435e+10	9.86293e+10
2011-06-28	5.58439	18	164191	503426489	115488	380141362	0.0183128	0.205025	0.136636	0.996182	1	1	0.000100903	0.0160864	-0.193648	2.11534	2.29751e+09	0.559303	7.96124e+10	9.87412e+10
2011-06-29	5.58386	18	164176	503303510	115493	380210616	0.0182657	0.204845	0.133716	0.996003	1	1	0.000100907	0.0161069	-0.19376	2.11452	2.29635e+09	0.559332	7.96232e+10	9.87257e+10
2011-06-30	5.57994	18	164587	505575901	115797	381709068	0.0182996	0.204686	0.133533	0.996173	1	1	0.000100758	0.0164078	-0.193691	2.11533	2.30388e+09	0.560441	7.9616e+10	9.87372e+10
2011-07-01	5.59415	18	164490	501081162	115892	380616464	0.0182971	0.205902	0.133314	0.996137	1	1	0.000101151	0.015517	-0.193838	2.12046	2.27668e+09	0.557405	7.94142e+10	9.85278e+10
2011-07-02	5.59608	18	164196	499458113	115661	379286490	0.0183134	0.205602	0.132905	0.996265	1	1	0.000101302	0.0154278	-0.193799	2.12051	2.26919e+09	0.557072	7.93349e+10	9.84454e+10
2011-07-03	5.59479	18	163763	499268286	115679	379287212	0.0181947	0.20572	0.1323	0.996072	1	1	0.000101294	0.0154265	-0.193921	2.16444	2.23142e+09	0.557043	7.93324e+10	9.84427e+10
2011-07-04	5.59146	18	163691	499942711	115830	379873023	0.018201	0.205912	0.131402	0.996012	1	1	0.000101254	0.015402	-0.194167	2.17389	2.2335e+09	0.557689	7.94046e+10	9.85167e+10
2011-07-05	5.58973	18	163869	500910443	115976	380684626	0.0181259	0.205983	0.132235	0.996277	1	1	0.000101145	0.0154551	-0.194356	2.1736	2.23767e+09	0.557975	7.94622e+10	9.8575e+10
2011-07-06	5.58942	18	164036	501855784	116096	381382529	0.0179683	0.205889	0.133253	0.996047	1	1	0.000101049	0.015429	-0.194757	2.17427	2.24244e+09	0.558031	7.94608e+10	9.8577e+10
2011-07-07	5.59099	18	164149	502595834	116168	381927939	0.0179152	0.205944	0.133911	0.995883	1	1	0.000100984	0.0153668	-0.194543	2.17354	2.25103e+09	0.557837	7.94839e+10	9.86008e+10
2011-07-08	5.59021	18	164338	503876466	116310	382954341	0.017977	0.205857	0.132848	0.995971	1	1	0.000100846	0.0153826	-0.194701	2.17302	2.25627e+09	0.557926	7.96473e+10	9.87643e+10
2011-07-09	5.59307	18	164271	503683100	116258	383088385	0.0177109	0.206096	0.132394	0.995818	1	1	0.00010087	0.0153919	-0.194681	2.17286	2.25603e+09	0.55748	7.95386e+10	9.86557e+10
2011-07-10	5.59132	18	164460	504877850	116375	383659568	0.0177479	0.205911	0.13227	0.995881	1	1	0.000100783	0.0153134	-0.194521	2.17417	2.26322e+09	0.558042	7.95946e+10	9.87093e+10
2011-07-11	5.5793	18	164613	504691921	116535	382863164	0.0177677	0.205789	0.131624	0.9959	1	1	0.000100708	0.0153628	-0.194285	2.17375	2.26253e+09	0.559322	7.96053e+10	9.87259e+10
2011-07-12	5.57957	18	164894	506293447	116692	383983374	0.0177752	0.205785	0.131702	0.995876	1	1	0.000100554	0.015045	-0.194272	2.17591	2.27098e+09	0.559289	7.96571e+10	9.87854e+10
2011-07-13	5.57927	18	164973	507093649	116732	384517715	0.0177118	0.205787	0.130867	0.995582	1	1	0.0001005	0.0149459	-0.19421	2.17338	2.27368e+09	0.559469	7.97061e+10	9.88418e+10
2011-07-14	5.57525	18	164908	506427792	116699	383750217	0.0193008	0.205646	0.138609	0.996905	1	1	0.000100549	0.014845	-0.194135	2.17336	2.27084e+09	0.560071	7.95523e+10	9.86873e+10
2011-07-15	5.57655	18	165411	509557246	117042	386087317	0.0193275	0.20578	0.139505	0.996963	1	1	0.000100233	0.0148711	-0.194232	2.17383	2.28584e+09	0.559941	7.96335e+10	9.87676e+10
2011-07-16	5.57876	18	165268	508854234	116925	385594375	0.0193315	0.205616	0.139136	0.996963	1	1	0.000100291	0.0147944	-0.194281	2.17461	2.28333e+09	0.559513	7.93433e+10	9.83621e+10
2011-07-17	5.57908	18	165222	508581568	116887	385330760	0.019377	0.205603	0.142513	0.997032	1	1	0.000100318	0.0148011	-0.194231	2.17472	2.28198e+09	0.559446	7.93367e+10	9.83544e+10
2011-07-18	5.57728	18	165321	509171529	116950	385556294	0.0194931	0.205703	0.142929	0.997083	1	1	0.000100301	0.0148976	-0.194312	2.17426	2.28399e+09	0.559919	7.9413e+10	9.84321e+10
2011-07-19	5.57607	18	165394	509512692	117007	385808943	0.0194455	0.205726	0.144923	0.996945	1	1	0.000100272	0.0148654	-0.194112	2.17433	2.28571e+09	0.560154	7.94469e+10	9.84706e+10
2011-07-20	5.57559	18	165667	511204199	117215	387261514	0.0194247	0.205723	0.145494	0.996895	1	1	0.000100144	0.014817	-0.194226	2.17367	2.29207e+09	0.560449	7.94097e+10	9.84352e+10
2011-07-21	5.57693	18	165476	510119406	117063	386342822	0.019422	0.205855	0.145521	0.996894	1	1	0.000100266	0.0148174	-0.19409	2.17384	2.28656e+09	0.560323	7.93957e+10	9.84196e+10
2011-07-22	5.57861	18	165754	511481301	117273	387355290	0.0195555	0.205833	0.144988	0.996997	1	1	0.000100084	0.0147722	-0.193969	2.17664	2.29099e+09	0.559776	7.94215e+10	9.84461e+10
2011-07-23	5.57749	18	165608	510547779	117173	386626968	0.019655	0.205801	0.144806	0.997039	1	1	0.000100181	0.0148344	-0.194081	2.17614	2.28661e+09	0.559977	7.94289e+10	9.84534e+10
2011-07-24	5.5778	18	165548	510198587	117132	386392976	0.0197735	0.205804	0.144478	0.997153	1	1	0.000100212	0.0148452	-0.194095	2.17638	2.2853e+09	0.559898	7.94143e+10	9.84167e+10
2011-07-25	5.57587	18	165665	510852008	117200	386588587	0.0195609	0.20572	0.145059	0.997011	1	1	0.000100207	0.0149657	-0.193924	2.17618	2.28872e+09	0.560474	7.9441e+10	9.84605e+10
2011-07-26	5.5753	18	165703	511026664	117217	386512808	0.019532	0.205925	0.144792	0.996944	1	1	0.000100223	0.0148097	-0.193919	2.17612	2.28539e+09	0.560752	7.9516e+10	9.85372e+10
2011-07-27	5.57577	18	165808	511371859	117295	386703934	0.0195345	0.20583	0.147111	0.996907	1	1	0.000100207	0.0148124	-0.194017	2.17759	2.28729e+09	0.560767	7.95201e+10	9.85409e+10
2011-07-28	5.5744	18	165913	511925727	117364	386955325	0.0195099	0.205815	0.147565	0.996894	1	1	0.000100145	0.0148323	-0.193833	2.17724	2.2916e+09	0.560949	7.95425e+10	9.85678e+10
2011-07-29	5.57511	18	166025	512520196	117350	386499992	0.0196238	0.205931	0.14714	0.996964	1	1	0.000100058	0.0148003	-0.194097	2.17654	2.29447e+09	0.560652	7.96863e+10	9.87101e+10
2011-07-30	5.57348	18	166037	512445820	117360	386304150	0.0194931	0.206031	0.14146	0.997099	1	1	0.000100054	0.0148544	-0.194322	2.17638	2.29412e+09	0.560852	7.97142e+10	9.8754e+10
2011-07-31	5.57691	18	165842	511475947	117212	385760870	0.0194502	0.204271	0.141801	0.997055	1	1	0.000100164	0.0149622	-0.1943	2.1769	2.29045e+09	0.560335	7.97132e+10	9.87639e+10
2011-08-01	5.56133	18	166240	513140383	117539	386046886	0.0196489	0.203901	0.140723	0.997189	1	1	9.99609e-05	0.015427	-0.19449	2.17133	2.28269e+09	0.562242	7.50107e+10	9.19483e+10
2011-08-02	5.5712	18	166593	513218747	117865	386396246	0.0196863	0.203749	0.135707	0.997247	1	1	9.99764e-05	0.0152968	-0.193944	2.1765	2.28853e+09	0.56091	7.4043e+10	9.0401e+10
2011-08-03	5.57352	18	166738	514189643	117867	386222854	0.0198112	0.20315	0.134535	0.997289	1	1	9.98997e-05	0.01511	-0.193998	2.17824	2.29444e+09	0.560643	7.40523e+10	9.04106e+10
2011-08-04	5.5729	18	166798	514434661	117913	386360742	0.0197797	0.203117	0.129013	0.997332	1	1	9.98896e-05	0.0150831	-0.194054	2.17869	2.29018e+09	0.560881	7.40762e+10	9.04298e+10
2011-08-05	5.5724	18	167112	516282876	118120	387513747	0.0197434	0.202896	0.128894	0.997335	1	1	9.97228e-05	0.0151289	-0.193804	2.17821	2.29898e+09	0.561062	7.41167e+10	9.04623e+10
2011-08-06	5.57337	18	167024	515842080	118048	387372030	0.0197967	0.203008	0.128547	0.997373	1	1	9.97822e-05	0.0150909	-0.193754	2.17821	2.29699e+09	0.560979	7.41092e+10	9.04545e+10
2011-08-07	5.57383	18	166954	515429692	118002	387144184	0.0198122	0.203021	0.130593	0.997409	1	1	9.98432e-05	0.0150984	-0.193693	2.17812	2.2952e+09	0.561012	7.40982e+10	9.04399e+10
2011-08-08	5.57453	18	164827	517467345	115284	381908640	0.0195495	0.201572	0.130527	0.997281	1	1	9.96726e-05	0.0150477	-0.193611	2.1237	2.30396e+09	0.560953	7.41402e+10	9.04891e+10
2011-08-09	5.57382	18	164878	517705391	115370	382670082	0.0193835	0.201638	0.130842	0.997187	1	1	9.96626e-05	0.0149876	-0.193712	2.12265	2.30395e+09	0.561126	7.41533e+10	9.05015e+10
2011-08-10	5.57476	18	165164	519846803	115508	383543041	0.0194796	0.200969	0.131443	0.99723	1	1	9.9478e-05	0.0151148	-0.193892	2.11855	2.31309e+09	0.561085	7.41987e+10	9.05479e+10
2011-08-11	5.57402	18	165113	519472716	115534	384011022	0.0195453	0.200754	0.131553	0.997271	1	1	9.94987e-05	0.0152035	-0.193763	2.1181	2.31124e+09	0.561141	7.41549e+10	9.05089e+10
2011-08-12	5.57175	18	165074	519337760	115538	383843334	0.0194497	0.200663	0.131695	0.997173	1	1	9.94841e-05	0.0152905	-0.193874	2.11622	2.30655e+09	0.561277	7.41583e+10	9.05108e+10
2011-08-13	5.57213	18	165025	519068185	115501	383659820	0.019572	0.200689	0.131251	0.997309	1	1	9.94995e-05	0.0152908	-0.193672	2.11622	2.30515e+09	0.561141	7.42005e+10	9.05508e+10
2011-08-14	5.57204	18	165013	518984207	115495	383594407	0.0193905	0.200697	0.13353	0.997205	1	1	9.95248e-05	0.0152967	-0.193703	2.11647	2.30507e+09	0.561245	7.41989e+10	9.05493e+10
2011-08-15	5.57231	18	165404	521369842	115762	385333604	0.0194737	0.200578	0.133187	0.997201	1	1	9.93308e-05	0.015281	-0.193772	2.11613	2.31511e+09	0.561385	7.42968e+10	9.06679e+10
2011-08-16	5.574	18	165498	522137781	115797	385773258	0.0194974	0.2006	0.13349	0.997223	1	1	9.92574e-05	0.0152524	-0.193778	2.1159	2.31865e+09	0.561145	7.44006e+10	9.07671e+10
2011-08-17	5.56994	18	165464	521757961	115865	386519298	0.0194733	0.20071	0.133697	0.99717	1	1	9.93161e-05	0.0152932	-0.194058	2.11242	2.31435e+09	0.561833	7.438e+10	9.07348e+10
2011-08-18	5.56705	18	165614	522477919	115984	386924210	0.0194733	0.201156	0.13377	0.997156	1	1	9.92716e-05	0.0153346	-0.194133	2.11133	2.31649e+09	0.562429	7.4406e+10	9.07656e+10
2011-08-19	5.57777	18	166050	525013716	116149	389210351	0.0194524	0.201086	0.128894	0.997137	1	1	9.90992e-05	0.0152616	-0.19402	2.10903	2.33614e+09	0.561183	7.44189e+10	9.07745e+10
2011-08-20	5.57756	18	165957	526678999	115930	390313220	0.0192776	0.20096	0.12886	0.997133	1	1	9.8941e-05	0.0152403	-0.194158	2.11296	2.34271e+09	0.561228	7.44752e+10	9.08321e+10
2011-08-21	5.58031	18	165898	526478086	115872	390214607	0.0191312	0.200941	0.129392	0.997019	1	1	9.89268e-05	0.0152404	-0.194041	2.11347	2.34301e+09	0.560644	7.43964e+10	9.07528e+10
2011-08-22	5.57562	18	166113	527491953	116035	390665398	0.0191395	0.200598	0.129494	0.997053	1	1	9.88123e-05	0.0152166	-0.194291	2.11123	2.34072e+09	0.561237	7.44379e+10	9.07935e+10
2011-08-23	5.57497	18	166136	527583636	116049	390655872	0.0191561	0.200546	0.130038	0.997059	1	1	9.88152e-05	0.0152306	-0.194356	2.11163	2.34105e+09	0.561387	7.44415e+10	9.08071e+10
2011-08-24	5.5757	18	166241	528266996	116114	391154382	0.0191022	0.200539	0.130178	0.997103	1	1	9.87585e-05	0.0152258	-0.194506	2.11224	2.34401e+09	0.561318	7.4461e+10	90826523484
2011-08-25	5.57427	18	166245	528438345	116083	391152270	0.0191256	0.20047	0.131678	0.997163	1	1	9.87802e-05	0.0152415	-0.194631	2.1077	2.34557e+09	0.561757	7.45162e+10	9.08838e+10
2011-08-26	5.57485	18	166500	530106407	116255	392287102	0.019109	0.201106	0.131442	0.997158	1	1	9.85742e-05	0.0152554	-0.194624	2.10631	2.35274e+09	0.561338	7.45565e+10	9.09228e+10
2011-08-27	5.57489	18	166415	529572829	116195	391903570	0.0189395	0.20116	0.131113	0.99702	1	1	9.86112e-05	0.0153103	-0.194753	2.10654	2.35049e+09	0.561268	7.45223e+10	9.08884e+10
2011-08-28	5.57436	18	166285	528676916	116101	391112503	0.0189545	0.201128	0.130579	0.997011	1	1	9.87055e-05	0.0153098	-0.194743	2.10789	2.34697e+09	0.561454	7.45193e+10	9.0886e+10
2011-08-29	5.57915	18	166590	530669181	116303	392736480	0.0188743	0.200398	0.131258	0.997013	1	1	9.85509e-05	0.0153042	-0.194507	2.11585	2.36376e+09	0.560953	7.45403e+10	9.09094e+10
2011-08-30	5.57982	18	167217	532273155	116473	393800843	0.018716	0.200557	0.133912	0.996965	1	1	9.84334e-05	0.0151994	-0.194451	2.10217	2.41345e+09	0.56111	7.45797e+10	9.09514e+10
2011-08-31	5.58162	18	167082	531674518	116385	393682688	0.0186734	0.200577	0.134451	0.996926	1	1	9.84554e-05	0.0150671	-0.194447	2.09857	2.40934e+09	0.560592	7.44942e+10	9.08577e+10
2011-09-01	5.58548	18	168255	539081132	117156	399106908	0.0187323	0.200598	0.134145	0.996982	1	1	9.78434e-05	0.0148484	-0.19372	2.10505	2.45792e+09	0.56046	7.48081e+10	9.11648e+10
2011-09-02	5.5862	18	168220	538762079	117091	398379836	0.0186585	0.20047	0.134469	0.996919	1	1	9.78672e-05	0.0149446	-0.193434	2.10678	2.45792e+09	0.56042	7.4802e+10	9.11583e+10
2011-09-03	5.58604	18	168173	538436585	117064	398160485	0.0186531	0.200462	0.134567	0.996899	1	1	9.78873e-05	0.0149508	-0.193352	2.10683	2.45683e+09	0.560384	7.48159e+10	9.11725e+10
2011-09-04	5.58607	18	168115	538051823	117023	397857446	0.0185946	0.200476	0.134679	0.996818	1	1	9.79267e-05	0.0149562	-0.193206	2.10688	2.45522e+09	0.560405	7.47951e+10	9.11515e+10
2011-09-05	5.5844	18	168370	539596938	117204	398913408	0.0186122	0.200442	0.134333	0.996819	1	1	9.77825e-05	0.0150245	-0.193416	2.1059	2.46151e+09	0.560627	7.48374e+10	9.11933e+10
2011-09-06	5.58494	18	168490	540426649	117298	399693954	0.0183389	0.200679	0.136246	0.996427	1	1	9.77195e-05	0.0150331	-0.193397	2.10623	2.46521e+09	0.560602	7.49585e+10	9.13335e+10
2011-09-07	5.58485	18	168641	541350032	117409	400396216	0.0183336	0.200664	0.136739	0.996461	1	1	9.76285e-05	0.0150237	-0.193393	2.10594	2.46894e+09	0.560583	7.49759e+10	9.13494e+10
2011-09-08	5.58617	18	168829	542567509	117541	401406428	0.0183336	0.200643	0.136692	0.996462	1	1	9.752e-05	0.0151008	-0.193515	2.10703	2.47548e+09	0.560382	7.49923e+10	9.13717e+10
2011-09-09	5.58324	18	168542	542282728	117148	400808990	0.0183376	0.200517	0.136713	0.996455	1	1	9.75766e-05	0.0151946	-0.193723	2.0973	2.47354e+09	0.561048	7.48779e+10	9.12484e+10
2011-09-10	5.58031	18	168577	542464797	117296	402342906	0.0183483	0.201924	0.13693	0.996453	1	1	9.75647e-05	0.0151009	-0.193486	2.09357	2.47e+09	0.561506	7.48788e+10	9.12557e+10
2011-09-11	5.57993	18	168377	541183956	117160	401427992	0.0183429	0.201878	0.136862	0.99645	1	1	9.76807e-05	0.0151161	-0.193525	2.09374	2.46697e+09	0.561529	7.48791e+10	9.12512e+10
2011-09-12	5.5797	18	168480	541939683	117222	401906964	0.0182933	0.201917	0.138288	0.996257	1	1	9.76127e-05	0.0152077	-0.193698	2.09184	2.47022e+09	0.561547	7.49073e+10	9.12795e+10
2011-09-13	5.5783	18	168600	542581229	117303	402198638	0.0183566	0.201817	0.138491	0.996313	1	1	9.76167e-05	0.01537	-0.19379	2.09225	2.47363e+09	0.562169	7.47343e+10	9.11112e+10
2011-09-14	5.57934	18	174917	542604853	124553	402057752	0.0183159	0.201955	0.136738	0.996511	1	1	9.76358e-05	0.0154825	-0.193933	2.13741	2.47342e+09	0.562146	7.46738e+10	9.10603e+10
2011-09-15	5.5816	18	175378	544303898	125149	406634050	0.018163	0.202074	0.136533	0.996372	1	1	9.7601e-05	0.0156339	-0.194409	2.13881	2.48088e+09	0.56244	7.48463e+10	9.12536e+10
2011-09-16	5.58218	18	175541	545608383	125264	407790588	0.0178485	0.202111	0.135027	0.996015	1	1	9.74392e-05	0.0154762	-0.194722	2.13962	2.48593e+09	0.562062	7.48443e+10	9.12308e+10
2011-09-17	5.58015	18	175566	545566908	125283	407511992	0.0177909	0.202085	0.134928	0.995914	1	1	9.74062e-05	0.0154745	-0.194881	2.13954	2.48563e+09	0.562152	7.48378e+10	9.12231e+10
2011-09-18	5.57966	18	175485	545050693	125222	407052438	0.0179376	0.202037	0.136017	0.995882	1	1	9.74591e-05	0.0154693	-0.194979	2.13967	2.48357e+09	0.562269	7.48362e+10	9.12215e+10
2011-09-19	5.57793	18	175597	545583460	125297	407188633	0.0177789	0.201708	0.132669	0.995817	1	1	9.74513e-05	0.0155025	-0.194949	2.14025	2.48649e+09	0.562768	7.50862e+10	9.14715e+10
2011-09-20	5.57757	18	176171	548986064	125731	410032198	0.0176434	0.201803	0.133577	0.995547	1	1	9.71611e-05	0.0154632	-0.194598	2.14278	2.50198e+09	0.562846	7.52357e+10	9.16951e+10
2011-09-21	5.57852	18	176116	549001070	125654	409760490	0.0175412	0.201517	0.131469	0.995529	1	1	9.71648e-05	0.0155553	-0.19449	2.14042	2.50159e+09	0.562777	7.52139e+10	9.16706e+10
2011-09-22	5.57913	18	176373	550627657	125846	411006914	0.0175335	0.201619	0.130775	0.995522	1	1	9.7015e-05	0.0155521	-0.194179	2.14094	2.50931e+09	0.562635	7.52666e+10	9.17241e+10
2011-09-23	5.57865	18	176534	551521642	125964	411628806	0.0175037	0.20157	0.129828	0.995519	1	1	9.69456e-05	0.0155411	-0.194067	2.14116	2.51374e+09	0.562782	7.52954e+10	9.17532e+10
2011-09-24	5.5784	18	176502	551339642	125936	411447504	0.0174348	0.201563	0.130025	0.995666	1	1	9.6963e-05	0.0155425	-0.194213	2.14077	2.51274e+09	0.562832	7.53023e+10	9.17588e+10
2011-09-25	5.57749	18	176458	551014720	125908	411156004	0.0174323	0.201544	0.131548	0.995697	1	1	9.6969e-05	0.0156041	-0.194208	2.14059	2.51138e+09	0.562837	7.52663e+10	9.16604e+10
2011-09-26	5.5754	18	176716	552455009	126131	412539900	0.0172448	0.201827	0.13224	0.995387	1	1	9.68515e-05	0.0156325	-0.19435	2.13996	2.51732e+09	0.56321	7.52998e+10	9.16988e+10
2011-09-27	5.57563	18	176764	552792148	126159	412749896	0.0172462	0.201753	0.132505	0.995363	1	1	9.68166e-05	0.015691	-0.194605	2.14061	2.5195e+09	0.563171	7.53105e+10	9.16688e+10
2011-09-28	5.57223	18	176846	553003895	126261	413124859	0.0173719	0.202208	0.132356	0.995643	1	1	9.6791e-05	0.0155637	-0.194737	2.1395	2.51919e+09	0.563676	7.53687e+10	9.17375e+10
2011-09-29	5.57249	18	177032	554129594	126392	413912086	0.0173556	0.202172	0.133049	0.995568	1	1	9.67045e-05	0.015546	-0.194541	2.13992	2.52439e+09	0.563728	7.54277e+10	9.17969e+10
2011-09-30	5.56832	18	177216	555208650	126568	414753458	0.0173362	0.202869	0.132942	0.995519	1	1	9.664e-05	0.0155143	-0.194706	2.13513	2.52439e+09	0.564473	7.55383e+10	9.19253e+10
2011-10-01	5.55524	18	175648	547801505	125375	408093034	0.01734	0.20264	0.132983	0.995511	1	1	9.71537e-05	0.015544	-0.194664	2.11319	2.4782e+09	0.565593	7.53598e+10	9.16375e+10
2011-10-02	5.55848	18	175429	546560853	125212	407277986	0.0172836	0.202729	0.134283	0.995369	1	1	9.72479e-05	0.0155359	-0.19444	2.11526	2.47475e+09	0.565009	7.53279e+10	9.16055e+10
2011-10-03	5.5584	18	175455	546709013	125232	407392340	0.0173633	0.202735	0.13339	0.995507	1	1	9.72304e-05	0.0155336	-0.194402	2.11504	2.47521e+09	0.564991	7.53302e+10	9.16078e+10
2011-10-04	5.55841	18	175442	546632604	125222	407330508	0.017377	0.202739	0.132438	0.995709	1	1	9.72341e-05	0.0155331	-0.194391	2.11506	2.47492e+09	0.564958	7.53232e+10	9.16008e+10
2011-10-05	5.55898	18	175432	546610362	125214	407362980	0.0172632	0.202779	0.132175	0.995503	1	1	9.72428e-05	0.0155351	-0.194327	2.11525	2.47496e+09	0.564914	7.53246e+10	9.15996e+10
2011-10-06	5.55951	18	175420	546584368	125199	407345875	0.0171815	0.202763	0.130797	0.995364	1	1	9.72516e-05	0.0155603	-0.19427	2.1153	2.47488e+09	0.564866	7.53172e+10	9.15893e+10
2011-10-07	5.55886	18	175418	546520893	125203	407289040	0.0172489	0.202897	0.130819	0.995514	1	1	9.72567e-05	0.0156319	-0.194339	2.11507	2.47418e+09	0.564956	7.53114e+10	9.15835e+10
2011-10-08	5.55669	18	175806	548647630	125487	408656101	0.0170631	0.202861	0.131596	0.995003	1	1	9.71002e-05	0.0158488	-0.194153	2.11531	2.48442e+09	0.565547	7.54405e+10	9.17125e+10
2011-10-09	5.55665	18	175851	548877296	125526	408870032	0.0171238	0.202791	0.130713	0.995015	1	1	9.70891e-05	0.0158156	-0.194033	2.11617	2.48556e+09	0.565605	7.548e+10	9.17505e+10
2011-10-10	5.55496	18	176413	552151391	125943	411301882	0.0171432	0.20287	0.130412	0.994974	1	1	9.68362e-05	0.0157046	-0.19424	2.11573	2.49823e+09	0.566165	7.56668e+10	9.19257e+10
2011-10-11	5.55573	18	176472	552227753	125989	411229006	0.0169406	0.203519	0.129795	0.994456	1	1	9.68362e-05	0.0157033	-0.194054	2.11496	2.49617e+09	0.566092	7.57037e+10	9.19566e+10
2011-10-12	5.55636	18	176743	554015388	126176	412536398	0.016563	0.203435	0.130103	0.994652	1	1	9.66751e-05	0.0157338	-0.194126	2.11422	2.50273e+09	0.565968	7.59312e+10	9.22023e+10
2011-10-13	5.55597	18	176860	554683086	126260	413018754	0.0165427	0.203443	0.128133	0.994734	1	1	9.66221e-05	0.0157721	-0.19425	2.11456	2.50574e+09	0.566057	7.59564e+10	92228538649
2011-10-14	5.55637	18	176978	555351774	126372	413961906	0.0169057	0.203715	0.12637	0.994364	1	1	9.65728e-05	0.0159847	-0.194502	2.11498	2.50908e+09	0.566029	7.60026e+10	92300080354
2011-10-15	5.55674	18	177408	557196841	126593	415541468	0.0168991	0.203948	0.126614	0.994335	1	1	9.6409e-05	0.0159936	-0.194512	2.09957	2.51776e+09	0.566	7.60879e+10	9.23892e+10
2011-10-16	5.55594	18	177032	554836753	126330	413764586	0.0167447	0.203992	0.126855	0.994404	1	1	9.66098e-05	0.0160462	-0.194282	2.09884	2.50646e+09	0.566054	7.60571e+10	9.23559e+10
2011-10-17	5.55606	18	177246	556184866	126486	414803032	0.0165296	0.204003	0.126864	0.99466	1	1	9.64827e-05	0.0160265	-0.194272	2.09884	2.51255e+09	0.565956	7.60753e+10	9.23733e+10
2011-10-18	5.55413	18	177442	557249562	126623	415364526	0.0165472	0.203857	0.127758	0.994696	1	1	9.63695e-05	0.0161235	-0.194463	2.09875	2.5178e+09	0.566138	7.61873e+10	9.24907e+10
2011-10-19	5.55243	18	177528	557630367	126673	415256264	0.0164951	0.20371	0.127443	0.994591	1	1	9.63191e-05	0.0161236	-0.1946	2.09768	2.51889e+09	0.566286	7.62269e+10	9.25322e+10
2011-10-20	5.55167	18	177912	559916898	126976	417197183	0.0165039	0.203632	0.127022	0.994233	1	1	9.61407e-05	0.0160951	-0.194254	2.09777	2.52768e+09	0.566655	7.6364e+10	9.26736e+10
2011-10-21	5.54914	18	177711	558401323	126850	415979033	0.0164926	0.20392	0.127093	0.994143	1	1	9.62086e-05	0.0158715	-0.194372	2.09396	2.51615e+09	0.56668	7.63492e+10	9.2659e+10
2011-10-22	5.55153	18	177655	558168860	126821	416193388	0.0163564	0.204092	0.126586	0.994248	1	1	9.62453e-05	0.015866	-0.19429	2.09532	2.51556e+09	0.566384	7.63418e+10	9.26492e+10
2011-10-23	5.55191	18	177606	557892379	126781	415965507	0.0162889	0.20409	0.12705	0.994291	1	1	9.62548e-05	0.0158708	-0.194302	2.09516	2.51453e+09	0.566237	7.6338e+10	9.2645e+10
2011-10-24	5.55152	18	177693	558404665	126826	416077178	0.0162826	0.203944	0.127343	0.994477	1	1	9.62245e-05	0.0158791	-0.194469	2.09504	2.51691e+09	0.566347	7.63533e+10	9.2666e+10
2011-10-25	5.54808	18	177996	560026939	127147	418342413	0.01635	0.203723	0.128305	0.994367	1	1	9.6109e-05	0.0162032	-0.194445	2.0957	2.52292e+09	0.567164	7.65164e+10	9.29206e+10
2011-10-26	5.55062	18	178043	560283840	127181	418657289	0.0163663	0.203669	0.128247	0.994295	1	1	9.6109e-05	0.0160816	-0.194365	2.10032	2.53027e+09	0.567024	7.65203e+10	9.29267e+10
2011-10-27	5.54964	18	178122	560579300	127248	418830646	0.0162168	0.203605	0.127439	0.994431	1	1	9.6081e-05	0.0160779	-0.194122	2.1013	2.53181e+09	0.5672	7.65151e+10	9.29155e+10
2011-10-28	5.55384	18	178401	562583006	127313	419700504	0.0162168	0.203583	0.127657	0.99442	1	1	9.59395e-05	0.0161542	-0.194516	2.1039	2.54061e+09	0.566745	7.65506e+10	9.29527e+10
2011-10-29	5.55514	18	178325	562240320	127251	419511696	0.0162255	0.20367	0.124687	0.994318	1	1	9.59612e-05	0.0161285	-0.19441	2.10377	2.53999e+09	0.566483	7.65165e+10	9.29098e+10
2011-10-30	5.55746	18	178428	563345727	127351	420294664	0.0163195	0.203649	0.123573	0.99398	1	1	9.59067e-05	0.016074	-0.19439	2.11493	2.54854e+09	0.566467	7.66045e+10	9.29864e+10
2011-10-31	5.55753	18	178199	561850254	127208	419511888	0.0160431	0.203903	0.12439	0.994207	1	1	9.60148e-05	0.0161531	-0.19409	2.11392	2.54153e+09	0.566365	7.65546e+10	9.29287e+10
2011-11-01	5.54112	18	177785	558931635	127305	416583382	0.0159807	0.204376	0.125319	0.994146	1	1	9.62659e-05	0.0161329	-0.194473	2.11932	2.5268e+09	0.568846	7.67087e+10	9.30555e+10
2011-11-02	5.54634	18	177621	559773267	126749	416918310	0.0159478	0.204379	0.125655	0.994312	1	1	9.61771e-05	0.0161029	-0.194397	2.1194	2.53564e+09	0.567977	7.67168e+10	9.30564e+10
2011-11-03	5.54453	18	177735	560299090	126878	417723917	0.0160067	0.204502	0.125194	0.994331	1	1	9.60999e-05	0.0160615	-0.194255	2.11957	2.53776e+09	0.56814	7.6727e+10	9.30691e+10
2011-11-04	5.54683	18	177802	560926478	126937	418617722	0.0160267	0.200853	0.115212	0.993318	1	1	9.6062e-05	0.015966	-0.194094	2.11946	2.54023e+09	0.567846	7.67544e+10	9.31246e+10
2011-11-05	5.54766	18	177854	560930724	127001	418860534	0.0160454	0.200914	0.115936	0.993348	1	1	9.60656e-05	0.0162251	-0.194078	2.12147	2.53863e+09	0.567726	7.67628e+10	9.31398e+10
2011-11-06	5.54597	18	177674	559656928	126879	417829024	0.0161747	0.200745	0.116242	0.993329	1	1	9.62005e-05	0.0162879	-0.193846	2.12165	2.53281e+09	0.568141	7.67535e+10	9.31302e+10
2011-11-07	5.54573	18	177761	560104794	126951	418215305	0.0162037	0.200697	0.11714	0.992604	1	1	9.61589e-05	0.0162549	-0.194065	2.12171	2.53438e+09	0.56817	7.67936e+10	9.31625e+10
2011-11-08	5.54336	18	177993	561600638	127120	419223586	0.016243	0.200667	0.116755	0.992783	1	1	9.60248e-05	0.0162536	-0.194068	2.11905	2.53853e+09	0.568481	7.68986e+10	9.3264e+10
2011-11-09	5.5372	18	177850	560188158	127081	418372566	0.0162853	0.200926	0.11783	0.993068	1	1	9.61944e-05	0.016236	-0.193892	2.11719	2.52883e+09	0.569691	7.69421e+10	9.33263e+10
2011-11-10	5.53315	18	178051	561590613	127233	419387018	0.0164139	0.201002	0.117633	0.992754	1	1	9.61205e-05	0.016235	-0.193617	2.11626	2.53389e+09	0.570587	7.70498e+10	9.34368e+10
2011-11-11	5.5323	18	178035	561346634	127231	419140312	0.0164139	0.200969	0.118505	0.992726	1	1	9.61672e-05	0.0162862	-0.193119	2.11664	2.53208e+09	0.570933	7.71138e+10	9.34962e+10
2011-11-12	5.53156	18	177858	560169350	127106	418160284	0.0163535	0.200329	0.119068	0.992712	1	1	9.62529e-05	0.0162158	-0.193038	2.11663	2.52722e+09	0.570971	7.71027e+10	9.34791e+10
[truncated: 780 more rows]
